# Supplementary material for: Cooperative photocatalysis and l-/d-proline catalysis enables enantioselective oxidative cross-dehydrogenative coupling of acyclic benzylic secondary amines with ketones
Source: Royal Society of Chemistry journal article supplement (doi:10.1039/d2qo01956f), 2023-01-01
Supplement: d2qo01956f1.pdf [file d2qo01956f1.pdf]

## Supporting Information

### **Cooperative Photocatalysis and *L-/D*-Proline Catalysis Enables Enantioselective Oxidative Cross-Dehydrogenative Coupling of Acyclic Benzylic Secondary Amines with Ketones**

Chao-Jiu Long,<sup>[a]</sup> Hong-Ping Pu,<sup>[a]</sup> Ya-Nan Zhao,<sup>[b]</sup> Yan-Hong He\*<sup>[a]</sup> and Zhi Guan\*<sup>[a]</sup>

[a] Key Laboratory of Applied Chemistry of Chongqing Municipality, School of Chemistry and  
Chemical Engineering, Southwest University, Chongqing 400715, China  
Emails: heyh@swu.edu.cn (for Y.-H. He); guanzhi@swu.edu.cn (for Z. Guan)

[b] Analytical and Testing Center, Southwest University, Chongqing 400715, China

## Table of Contents

|                                                                                                                                                                      |      |
|----------------------------------------------------------------------------------------------------------------------------------------------------------------------|------|
| 1. General considerations .....                                                                                                                                      | S1   |
| 2. General procedure for the visible-light-induced enantioselective oxidative cross-dehydrogenative coupling of acyclic benzylic secondary amines with ketones ..... | S2   |
| 3. Preparation and characterization of substrates <b>1</b> .....                                                                                                     | S2   |
| 4. General procedure for preparing racemic products as chiral HPLC controls.....                                                                                     | S8   |
| 5. Optimization details .....                                                                                                                                        | S9   |
| 6. Scale-up experiments .....                                                                                                                                        | S16  |
| 7. Crystallographic data of compound <b>3a</b> .....                                                                                                                 | S17  |
| 8. Stern-Volmer luminescence quenching experiments.....                                                                                                              | S24  |
| 9. Cyclic voltammetry studies .....                                                                                                                                  | S25  |
| 10. Unsuccessful substrates.....                                                                                                                                     | S29  |
| 11. Possible mechanism for the reaction without $\text{KHCO}_3$ .....                                                                                                | S29  |
| 12. Characterization data of the products <b>3</b> and <b>4</b> .....                                                                                                | S30  |
| 13. References.....                                                                                                                                                  | S62  |
| 14. NMR spectra .....                                                                                                                                                | S65  |
| 15. HRMS spectra .....                                                                                                                                               | S128 |
| 16. Chiral HPLC spectra .....                                                                                                                                        | S139 |

## 1. General considerations

Unless otherwise noted, all chemicals and reagents were purchased from commercial suppliers and were used without further purification. All glassware was oven-dried at 120 °C. All photoreactions were conducted in single neck round bottom flask unless otherwise noted. The light source was a 9 W blue LED lamp (450 nm, placed approximately 5 cm from the reaction flask) without any filters. All reactions were monitored by thin-layer chromatography (TLC) with GF 254 silica gel pre-coated plates (0.25 mm, Qingdao Haiyang chemical industry Co. Ltd., Qingdao, China) using UV light and vanillic aldehyde as visualizing agents. Flash chromatography was performed using silica gel (200-300 mesh) at increased pressure. NMR spectra were recorded on Bruker AVANCE III (400 MHz) and Bruker AVANCE DMX600 (600 MHz) spectrometers. Chemical shifts for <sup>1</sup>H NMR and <sup>13</sup>C NMR were referenced to TMS (0.00 ppm) or residual undeuterated solvent signals (7.26 ppm for <sup>1</sup>H NMR in CDCl<sub>3</sub>, 77.16 ppm for <sup>13</sup>C NMR in CDCl<sub>3</sub>) respectively. <sup>19</sup>F NMR data were calibrated using CFC<sub>3</sub> as an external reference (0.0 ppm). Data for NMR are reported as follows: chemical shift (ppm), integration, multiplicity (s = singlet, d = doublet, t = triplet, q = quartet, p = pentet, dd = doublet of doublets, br = broad and m = multiplet), and coupling constant (Hz). High-resolution mass spectra (HRMS) were acquired on Bruker Impact II TOF mass spectrometer using ESI ionization sources. Optical rotations were measured on a Perkin Elmer 341 Polarimeter at λ = 589 nm. The diastereomeric ratio (dr) and enantiomeric excess (ee) of products were determined by chiral HPLC analysis carried out on a Shimadzu LC-20A instrument using Chiralpak AD-H, Chiralpak OD-H, Chiralpak AS-H, Chiralpak IC and Chiralpak OJ-H (0.46 cm Φ × 25 cm, 5 μm, Daicel Chiral Technologies CO., LTD.). Cyclic voltammograms were obtained on a CHI 700E potentiostat (CH Instruments, Inc.). Single-crystal X-ray diffraction measurements were carried out on an Agilent SuperNova, Dual, Cu at home/near EosS2 diffractometer.

## 2. General procedure for the visible-light-induced enantioselective oxidative cross-dehydrogenative coupling of acyclic benzylic secondary amines with ketones

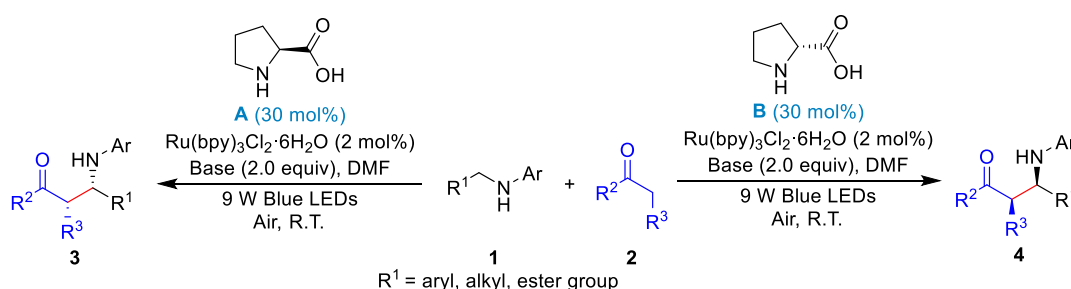

To a 10 mL round-bottom flask equipped with a magnetic stirring bar was added **1** (0.3 mmol, 1.0 equiv), Ru(bpy)<sub>3</sub>Cl<sub>2</sub>·6H<sub>2</sub>O (4 mg, 0.006 mmol, 2 mol%), and DMF (dried over 3 Å molecular sieves, 2 mL). The mixture was irradiated with a 9 W blue LED lamp under the air atmosphere at room temperature. After full conversion of **1** as monitored by TLC, the light was turned off. **2** (1.5–6.0 mmol, 5.0–20.0 equiv, as indicated), the chiral catalyst (0.009 mmol, 30 mol% **A** or **B**, as indicated) and the base (0.6 mmol, 2.0 equiv KHCO<sub>3</sub> or KOH, as indicated) were added, then the mixture was stirred without light. The reaction was monitored by TLC. After completion of the reaction, the mixture was diluted with 20 mL EtOAc, and washed with brine (10 mL × 2). The organic phase was dried over anhydrous Na<sub>2</sub>SO<sub>4</sub> and filtered. The filtrate was collected and concentrated in vacuum to remove the solvent. The residue was purified by flash column chromatography on silica gel using petroleum ether/EtOAc (v/v, 25:1 to 5:1) as eluent to obtain the corresponding product **3** or **4**.

## 3. Preparation and characterization of substrates **1**

The following substrates **1** were purchased from commercial sources (Figure S1).

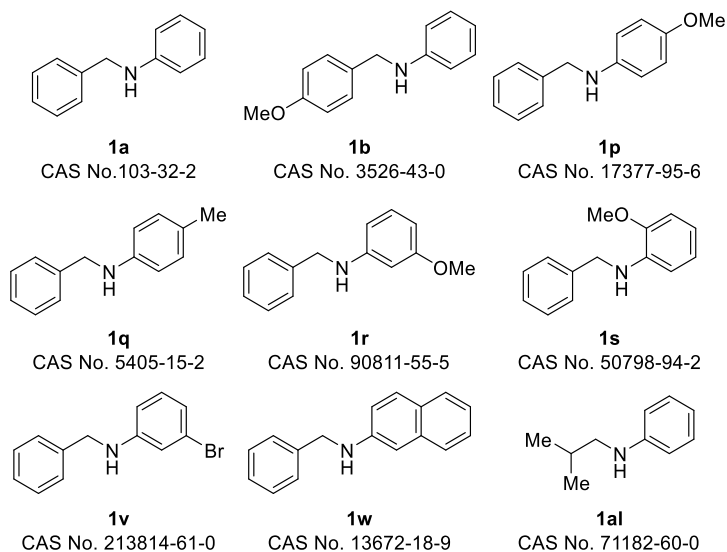

**Figure S1.** Substrates **1** purchased from commercial sources.

The other substrates **1** were synthesized according to literature:

### General procedure<sup>[1]</sup>

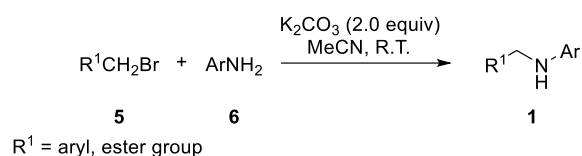

A 100 mL round-bottomed flask equipped with a magnetic stirring bar was charged with **5** (5.0 mmol, 1.0 equiv), **6** (7.5 mmol, 1.5 equiv), K<sub>2</sub>CO<sub>3</sub> (1.38 g, 10.0 mmol, 2.0 equiv) and MeCN (70 mL). The reaction mixture was vigorously stirred at room temperature. The reaction was monitored by TLC. Upon completion, the reaction mixture was filtered by Celite and washed with EtOAc. The filtrate was collected and concentrated in vacuum to remove the solvent. The residue was directly submitted to flash column chromatography on silica gel using petroleum ether/EtOAc (300:1 to 20:1) to obtain the corresponding compound **1**.

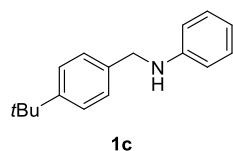

### *N*-(4-(*tert*-butyl)benzyl)aniline (**1c**)<sup>[1]</sup>

White solid.

<sup>1</sup>H NMR (600 MHz, CDCl<sub>3</sub>): δ 7.36 (d, *J* = 8.1 Hz, 2H), 7.30 (d, *J* = 8.0 Hz, 2H), 7.17 (t, *J* = 7.7 Hz, 2H), 6.71 (t, *J* = 7.3 Hz, 1H), 6.64 (d, *J* = 7.8 Hz, 2H), 4.28 (s, 2H), 4.10 (br s, 1H), 1.32 (s, 9H).

$^{13}\text{C}$  NMR (151 MHz,  $\text{CDCl}_3$ ):  $\delta$  150.3, 148.2, 136.3, 129.3, 127.4, 125.6, 117.6, 113.0, 34.5, 31.4.

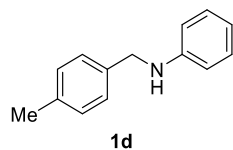

***N*-(4-methylbenzyl)aniline (1d)<sup>[2]</sup>**

Yellow oil.

$^1\text{H}$  NMR (600 MHz,  $\text{CDCl}_3$ ):  $\delta$  7.24 (d,  $J = 7.6$  Hz, 2H), 7.14 (q,  $J = 7.6$  Hz, 4H), 6.69 (t,  $J = 7.1$  Hz, 1H), 6.61 (d,  $J = 7.9$  Hz, 2H), 4.25 (s, 2H), 3.92 (br s, 1H), 2.33 (s, 3H).

$^{13}\text{C}$  NMR (151 MHz,  $\text{CDCl}_3$ ):  $\delta$  148.3, 136.9, 136.5, 129.4, 129.3, 127.6, 117.6, 113.0, 48.2, 21.1.

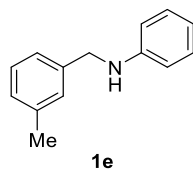

***N*-(3-methylbenzyl)aniline (1e)<sup>[3]</sup>**

Yellow oil.

$^1\text{H}$  NMR (600 MHz,  $\text{CDCl}_3$ ):  $\delta$  7.24 – 7.19 (m, 1H), 7.19 – 7.11 (m, 4H), 7.07 (d,  $J = 7.2$  Hz, 1H), 6.70 (t,  $J = 7.3$  Hz, 1H), 6.62 (d,  $J = 7.9$  Hz, 2H), 4.26 (s, 2H), 3.99 (br s, 1H), 2.33 (s, 3H).

$^{13}\text{C}$  NMR (151 MHz,  $\text{CDCl}_3$ ):  $\delta$  148.3, 139.4, 138.3, 129.2, 128.5, 128.3, 128.0, 124.6, 117.6, 112.9, 48.4, 21.4.

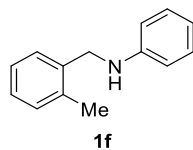

***N*-(2-methylbenzyl)aniline (1f)<sup>[4]</sup>**

Yellow oil.

$^1\text{H}$  NMR (600 MHz,  $\text{CDCl}_3$ ):  $\delta$  7.32 (d,  $J = 7.1$  Hz, 1H), 7.20 – 7.16 (m, 5H), 6.71 (t,  $J = 7.2$  Hz, 1H), 6.62 (d,  $J = 7.9$  Hz, 2H), 4.25 (s, 2H), 3.82 (br s, 1H), 2.36 (s, 3H).

$^{13}\text{C}$  NMR (151 MHz,  $\text{CDCl}_3$ ):  $\delta$  148.4, 137.1, 136.3, 130.4, 129.3, 128.3, 127.4, 126.2, 117.6, 112.8, 46.5, 18.9.

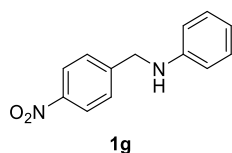

***N*-(4-nitrobenzyl)aniline (1g)<sup>[4]</sup>**

Red oil.

**<sup>1</sup>H NMR (600 MHz, CDCl<sub>3</sub>):** δ 8.16 (d, *J* = 8.5 Hz, 2H), 7.51 (d, *J* = 8.5 Hz, 2H), 7.16 (t, *J* = 7.9 Hz, 2H), 6.73 (t, *J* = 7.3 Hz, 1H), 6.57 (d, *J* = 8.0 Hz, 2H), 4.45 (s, 2H), 4.01 (br s, 1H).

**<sup>13</sup>C NMR (151 MHz, CDCl<sub>3</sub>):** δ 147.6, 147.4, 147.3, 129.4, 127.7, 123.9, 118.2, 113.0, 47.7.

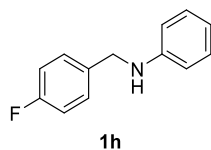

***N*-(4-fluorobenzyl)aniline (1h)<sup>[1]</sup>**

Yellow oil.

**<sup>1</sup>H NMR (600 MHz, CDCl<sub>3</sub>):** δ 7.33 – 7.31 (m, 2H), 7.16 (t, *J* = 7.9 Hz, 2H), 7.01 (t, *J* = 8.6 Hz, 2H), 6.72 (t, *J* = 7.3 Hz, 1H), 6.62 (d, *J* = 7.7 Hz, 2H), 4.29 (s, 2H), 4.04 (br s, 1H).

**<sup>13</sup>C NMR (151 MHz, CDCl<sub>3</sub>):** δ 162.1 (d, *J* = 245.2 Hz), 147.9, 135.1 (d, *J* = 3.0 Hz), 129.3, 129.0 (d, *J* = 8.0 Hz), 117.9, 115.4 (d, *J* = 21.4 Hz), 113.0, 47.7.

**<sup>19</sup>F NMR (376 MHz, CDCl<sub>3</sub>):** δ -115.6.

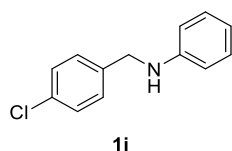

***N*-(4-chlorobenzyl)aniline (1i)<sup>[4]</sup>**

Yellow oil.

**<sup>1</sup>H NMR (600 MHz, CDCl<sub>3</sub>):** δ 7.29 – 7.26 (m, 4H), 7.16 – 7.14 (m, 2H), 6.71 (t, *J* = 7.3 Hz, 1H), 6.59 (d, *J* = 8.3 Hz, 2H), 4.28 (s, 2H), 4.02 (br s, 1H).

**<sup>13</sup>C NMR (151 MHz, CDCl<sub>3</sub>):** δ 147.9, 138.1, 132.9, 129.3, 128.8, 128.7, 117.9, 113.0, 47.7.

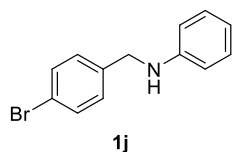

***N*-(4-bromobenzyl)aniline (1j)<sup>[4]</sup>**

Yellow oil.

**<sup>1</sup>H NMR (600 MHz, CDCl<sub>3</sub>):** δ 7.44 (d, *J* = 8.2 Hz, 2H), 7.23 (d, *J* = 7.9 Hz, 2H), 7.16 (t, *J* = 7.6 Hz, 2H), 6.72 (t, *J* = 7.1 Hz, 1H), 6.59 (d, *J* = 8.0 Hz, 2H), 4.27 (s, 2H), 4.04 (br s, 1H).

**<sup>13</sup>C NMR (151 MHz, CDCl<sub>3</sub>):** δ 147.8, 138.6, 131.7, 129.3, 129.1, 121.0, 117.9, 113.0, 47.8.

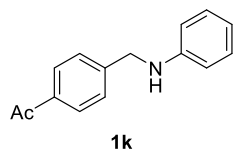

**1-(4-((Phenylamino)methyl)phenyl)ethan-1-one (1k)<sup>[1]</sup>**

White solid.

**<sup>1</sup>H NMR (600 MHz, CDCl<sub>3</sub>):** δ 7.92 (d, *J* = 8.1 Hz, 2H), 7.46 (d, *J* = 8.0 Hz, 2H), 7.16 (t, *J* = 7.8 Hz, 2H), 6.73 (t, *J* = 7.2 Hz, 1H), 6.61 (d, *J* = 8.2 Hz, 2H), 4.41 (s, 2H), 4.30 (br s, 1H), 2.58 (s, 3H).

**<sup>13</sup>C NMR (151 MHz, CDCl<sub>3</sub>):** δ 197.6, 147.7, 145.1, 136.3, 129.3, 128.7, 127.3, 118.0, 113.0, 48.1, 26.5.

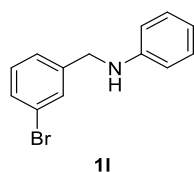

***N*-(3-bromobenzyl)aniline (1l)<sup>[3]</sup>**

Yellow oil.

**<sup>1</sup>H NMR (600 MHz, CDCl<sub>3</sub>):** δ 7.50 (s, 1H), 7.37 (d, *J* = 7.9 Hz, 1H), 7.26 (d, *J* = 7.6 Hz, 1H), 7.16 (q, *J* = 8.2 Hz, 3H), 6.71 (t, *J* = 7.3 Hz, 1H), 6.58 (d, *J* = 8.0 Hz, 2H), 4.27 (s, 2H), 4.01 (br s, 1H).

**<sup>13</sup>C NMR (151 MHz, CDCl<sub>3</sub>):** δ 147.8, 142.1, 130.4, 130.3, 130.2, 129.4, 125.9, 122.8, 117.9, 113.0, 47.8.

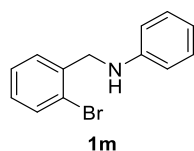

***N*-(2-bromobenzyl)aniline (1m)<sup>[1]</sup>**

Yellow oil.



**<sup>1</sup>H NMR (600 MHz, CDCl<sub>3</sub>):** δ 7.56 (d, *J* = 7.9 Hz, 1H), 7.40 (d, *J* = 7.5 Hz, 1H), 7.25 – 7.22 (m, 1H), 7.19 – 7.14 (m, 2H), 7.14 – 7.10 (m, 1H), 6.72 (t, *J* = 7.3 Hz, 1H), 6.62 (d, *J* = 7.7 Hz, 2H), 4.40 (s, 2H), 4.06 (br s, 1H).

**<sup>13</sup>C NMR (151 MHz, CDCl<sub>3</sub>):** δ 147.6, 138.2, 132.8, 129.3 × 2 (129.29, 129.26), 128.7, 127.6, 123.3, 117.9, 113.1, 48.5.

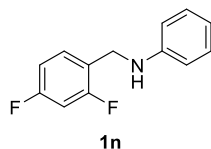

***N*-(2,4-difluorobenzyl)aniline (1n)<sup>[1]</sup>**

Yellow oil.

**<sup>1</sup>H NMR (600 MHz, CDCl<sub>3</sub>):** δ 7.35 – 7.31 (m, 1H), 7.18 – 7.15 (m, 2H), 6.82 – 6.79 (m, 2H), 6.72 (t, *J* = 7.3 Hz, 1H), 6.62 (d, *J* = 7.8 Hz, 2H), 4.35 (s, 2H), 4.02 (br s, 1H).

**<sup>13</sup>C NMR (151 MHz, CDCl<sub>3</sub>):** δ 162.3 (dd, *J* = 248.2, 12.0 Hz), 160.8 (dd, *J* = 248.8, 11.9 Hz), 147.6, 130.2 (dd, *J* = 9.6, 6.1 Hz), 129.3, 122.3 (dd, *J* = 14.8, 3.5 Hz), 118.0, 113.0, 111.2 (dd, *J* = 21.0, 3.7 Hz), 103.8 (t, *J* = 25.4 Hz), 41.5 (d, *J* = 3.5 Hz).

**<sup>19</sup>F NMR (565 MHz, CDCl<sub>3</sub>):** δ -115.2 (d, *J* = 7.1 Hz), -114.9 (d, *J* = 7.1 Hz).

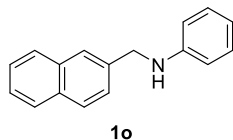

***N*-(naphthalen-2-ylmethyl)aniline (1o)<sup>[1]</sup>**

Yellow oil.

**<sup>1</sup>H NMR (600 MHz, CDCl<sub>3</sub>):** δ 7.84 – 7.75 (m, 4H), 7.49 – 7.41 (m, 3H), 7.20 – 7.12 (m, 2H), 6.71 (t, *J* = 7.3 Hz, 1H), 6.65 (d, *J* = 7.9 Hz, 2H), 4.46 (s, 2H), 4.08 (br s, 1H).

**<sup>13</sup>C NMR (151 MHz, CDCl<sub>3</sub>):** δ 148.2, 137.0, 133.6, 132.8, 129.3, 128.4, 127.8, 127.7, 126.2, 126.0, 125.8 × 2 (125.78, 125.76), 117.7, 113.0, 48.6.

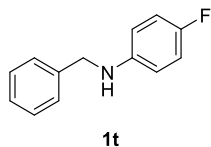

***N*-benzyl-4-fluoroaniline (1t)<sup>[4]</sup>**

Yellow oil.

**<sup>1</sup>H NMR (400 MHz, CDCl<sub>3</sub>):** δ 7.40 – 7.31 (m, 4H), 7.30 – 7.24 (m, 1H), 6.86 (t, *J* = 8.6 Hz, 2H), 6.59 – 6.51 (m, 2H), 4.26 (s, 2H), 3.76 (br s, 1H).

**<sup>13</sup>C NMR (101 MHz, CDCl<sub>3</sub>):** δ 155.9 (d, *J* = 235.9 Hz), 144.5 (d, *J* = 1.6 Hz), 139.3, 128.7, 127.5, 127.3, 115.7 (d, *J* = 22.4 Hz), 113.7 (d, *J* = 7.4 Hz), 49.0.

**<sup>19</sup>F NMR (376 MHz, CDCl<sub>3</sub>):** δ -127.8.

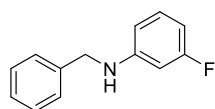

**1u**

#### ***N*-benzyl-3-fluoroaniline (1u)<sup>[5]</sup>**

Yellow oil.

**<sup>1</sup>H NMR (600 MHz, CDCl<sub>3</sub>):** δ 7.33 (d, *J* = 4.1 Hz, 4H), 7.30 – 7.24 (m, 1H), 7.10 – 7.03 (m, 1H), 6.42 – 6.34 (m, 2H), 6.33 – 6.28 (m, 1H), 4.28 (s, 2H), 4.13 (br s, 1H).

**<sup>13</sup>C NMR (151 MHz, CDCl<sub>3</sub>):** δ 164.2 (d, *J* = 243.0 Hz), 150.0 (d, *J* = 10.7 Hz), 138.9, 130.3 (d, *J* = 10.2 Hz), 128.7, 127.5, 127.4, 108.8, 104.0 (d, *J* = 21.7 Hz), 99.6 (d, *J* = 25.4 Hz), 48.3.

**<sup>19</sup>F NMR (565 MHz, CDCl<sub>3</sub>):** δ -112.8.

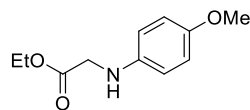

**1am**

#### **Ethyl (4-methoxyphenyl)glycinate (1am)<sup>[6]</sup>**

Yellow solid.

**<sup>1</sup>H NMR (600 MHz, CDCl<sub>3</sub>):** δ 6.77 (d, *J* = 8.9 Hz, 2H), 6.57 (d, *J* = 8.9 Hz, 2H), 4.21 (q, *J* = 7.1 Hz, 2H), 4.05 (br s, 1H), 3.83 (s, 2H), 3.72 (s, 3H), 1.27 (t, *J* = 7.2 Hz, 3H).

**<sup>13</sup>C NMR (151 MHz, CDCl<sub>3</sub>):** δ 171.4, 152.7, 141.4, 114.9, 114.4, 61.2, 55.7, 46.8, 14.2.

### **4. General procedure for preparing racemic products as chiral HPLC controls<sup>[7]</sup>**

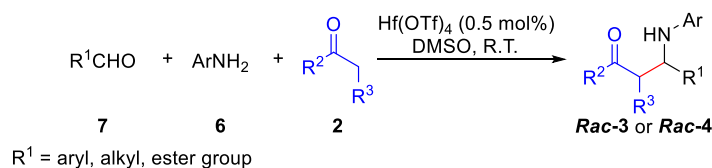

A round-bottomed flask equipped with a magnetic stirring bar was charged with **7** (0.3 mmol, 1.0 equiv), **6** (0.3 mmol, 1.0 equiv), **2** (6.0 mmol, 20.0 equiv), Hf(OTf)<sub>4</sub> (1.2 mg, 0.0015 mmol, 0.5 S8

mol%) and DMSO (3.0 mL). The reaction mixture was stirred at room temperature and monitored by TLC. After completion of the reaction, CH<sub>2</sub>Cl<sub>2</sub> (5 mL) was added to the reaction to dissolve the residue. the crude material was purified by preparative thin layer chromatography (silica gel, petroleum ether/EtOAc = 5:1 to 1:1) to give the desired racemic product (*Rac-3* or *Rac-4*).

## 5. Optimization details

**Table S1.** Screening of catalysts.<sup>[a]</sup>

| Entry | Catalyst | Yield [%] <sup>[b]</sup> | ee [%] <sup>[c]</sup> |
|-------|----------|--------------------------|-----------------------|
| 1     | <b>A</b> | 50                       | 90                    |
| 2     | <b>B</b> | 49                       | -90                   |
| 3     | <b>C</b> | 47                       | 56                    |
| 4     | <b>D</b> | 45                       | 90                    |
| 5     | <b>E</b> | 20                       | 22                    |

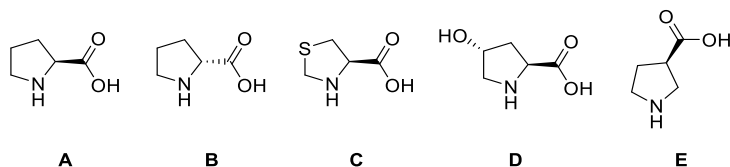

[a] Reaction conditions: **1a** (55 mg, 0.3 mmol, 1.0 equiv), **2a** (dried over 3Å molecular sieves, 666 μL, 9.0 mmol, 30.0 equiv), Ru(bpy)<sub>3</sub>Cl<sub>2</sub>·6H<sub>2</sub>O (6 mg, 0.009 mmol, 3 mol%) and Catalyst (0.09 mmol, 30 mol%) in DMF (dried over 3Å molecular sieves, 3.0 mL) irradiated with 9 W blue LEDs under air at room temperature. [b] Isolated yield. [c] Determined by HPLC analysis using a chiralpak AD-H column.

**Table S2.** Screening of the amounts of **A**.<sup>[a]</sup>

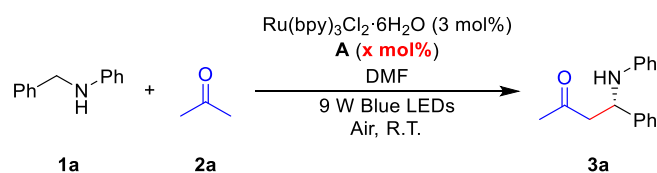

| Entry | A [mol%] | Yield [%] <sup>[b]</sup> | ee [%] <sup>[c]</sup> |
|-------|----------|--------------------------|-----------------------|
| 1     | 10       | 38                       | 90                    |
| 2     | 20       | 46                       | 90                    |
| 3     | 30       | 50                       | 90                    |
| 4     | 40       | 50                       | 90                    |
| 5     | 50       | 50                       | 90                    |

[a] Reaction conditions: **1a** (55 mg, 0.3 mmol, 1.0 equiv), **2a** (dried over 3Å molecular sieves, 666 μL, 9.0 mmol, 30.0 equiv), Ru(bpy)<sub>3</sub>Cl<sub>2</sub>·6H<sub>2</sub>O (6 mg, 0.009 mmol, 3 mol%) and **A** in DMF (dried over 3Å molecular sieves, 3.0 mL) irradiated with 9 W blue LEDs under air at room temperature.

[b] Isolated yield. [c] Determined by HPLC analysis using a chiralpak AD-H column.

**Table S3.** Screening of photocatalysts.<sup>[a]</sup>

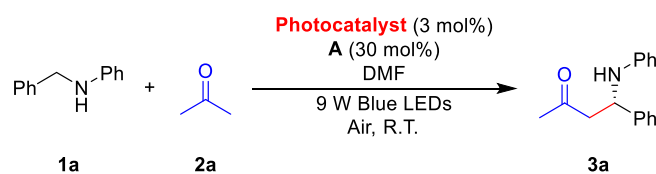

| Entry | Photocatalyst                                                     | Yield [%] <sup>[b]</sup> | ee [%] <sup>[c]</sup> |
|-------|-------------------------------------------------------------------|--------------------------|-----------------------|
| 1     | Ru(bpy) <sub>3</sub> Cl <sub>2</sub> ·6H <sub>2</sub> O           | 50                       | 90                    |
| 2     | Eosin Y                                                           | Trace                    | —                     |
| 3     | Rose Bengal                                                       | Trace                    | —                     |
| 4     | Rhodamine 6G                                                      | 38                       | 90                    |
| 5     | Mes-Acr-Me <sup>+</sup> ClO <sub>4</sub> <sup>-</sup>             | 43                       | 76                    |
| 6     | <i>fac</i> -Ir(ppy) <sub>3</sub>                                  | 35                       | 89                    |
| 7     | Ru(bpy) <sub>3</sub> PF <sub>6</sub>                              | 26                       | 82                    |
| 8     | Methylene blue                                                    | 18                       | 90                    |
| 9     | Fluorescein                                                       | 7                        | 88                    |
| 10    | [Ir(dF(CF <sub>3</sub> )ppy) <sub>2</sub> (dtbbpy)PF <sub>6</sub> | 35                       | 88                    |
| 11    | Ir(ppy) <sub>2</sub> (dtbbpy)PF <sub>6</sub>                      | 49                       | 87                    |
| 12    | None                                                              | N.R. <sup>[d]</sup>      | —                     |

[a] Reaction conditions: **1a** (55 mg, 0.3 mmol, 1.0 equiv), **2a** (dried over 3Å molecular sieves, 666

$\mu\text{L}$ , 9.0 mmol, 30.0 equiv), Photocatalyst (0.009 mmol, 3 mol%) and **A** (11 mg, 0.09 mmol, 30 mol%) in DMF (dried over 3Å molecular sieves, 3.0 mL) irradiated with 9 W blue LEDs under air at room temperature. [b] Isolated yield. [c] Determined by HPLC analysis using a chiralpak AD-H column. [d] No reaction.

**Table S4.** Screening of the amounts of  $\text{Ru}(\text{bpy})_3\text{Cl}_2 \cdot 6\text{H}_2\text{O}$ .<sup>[a]</sup>

$\text{Ru}(\text{bpy})_3\text{Cl}_2 \cdot 6\text{H}_2\text{O}$  (**x mol%**)  
**A** (30 mol%)  
 DMF  
 9 W Blue LEDs  
 Air, R.T.

| Entry    | $\text{Ru}(\text{bpy})_3\text{Cl}_2 \cdot 6\text{H}_2\text{O}$ (mol%) | Yield [%] <sup>[b]</sup> | ee [%] <sup>[c]</sup> |
|----------|-----------------------------------------------------------------------|--------------------------|-----------------------|
| 1        | 1                                                                     | 31                       | 90                    |
| <b>2</b> | <b>2</b>                                                              | <b>50</b>                | <b>90</b>             |
| 3        | 3                                                                     | 50                       | 90                    |
| 4        | 4                                                                     | 47                       | 91                    |
| 5        | 5                                                                     | 46                       | 88                    |

[a] Reaction conditions: **1a** (55 mg, 0.3 mmol, 1.0 equiv), **2a** (dried over 3Å molecular sieves, 666  $\mu\text{L}$ , 9.0 mmol, 30.0 equiv),  $\text{Ru}(\text{bpy})_3\text{Cl}_2 \cdot 6\text{H}_2\text{O}$  and **A** (11 mg, 0.09 mmol, 30 mol%) in DMF (dried over 3Å molecular sieves, 3.0 mL) irradiated with 9 W blue LEDs under air at room temperature.

[b] Isolated yield. [c] Determined by HPLC analysis using a chiralpak AD-H column.

**Table S5.** Screening of solvents.<sup>[a]</sup>

$\text{Ru}(\text{bpy})_3\text{Cl}_2 \cdot 6\text{H}_2\text{O}$  (2 mol%)  
**A** (30 mol%)  
**Solvent**  
 9 W Blue LEDs  
 Air, R.T.

| Entry    | Solvent    | Yield [%] <sup>[b]</sup> | ee [%] <sup>[c]</sup> |
|----------|------------|--------------------------|-----------------------|
| <b>1</b> | <b>DMF</b> | <b>50</b>                | <b>90</b>             |
| 2        | MeCN       | N.D. <sup>[d]</sup>      | —                     |
| 3        | MeOH       | 14                       | 90                    |
| 4        | EtOH       | 15                       | 88                    |





[a] Reaction conditions: **1a** (55 mg, 0.3 mmol, 1.0 equiv) and Ru(bpy)<sub>3</sub>Cl<sub>2</sub>·6H<sub>2</sub>O (4 mg, 0.006 mmol, 2 mol%) in DMF (dried over 3Å molecular sieves, 2.0 mL) irradiated with 9 W blue LEDs under air at room temperature. After full conversion of **1a**, the light was turned off. **2a** (dried over 3Å molecular sieves, 666 μL, 9.0 mmol, 30.0 equiv), **A** (11 mg, 0.09 mmol, 30 mol%) and KHCO<sub>3</sub> were added. [b] Isolated yield. [c] Determined by HPLC analysis using a chiralpak AD-H column.

**Table S9.** Screening of the amounts of **2a**.<sup>[a]</sup>

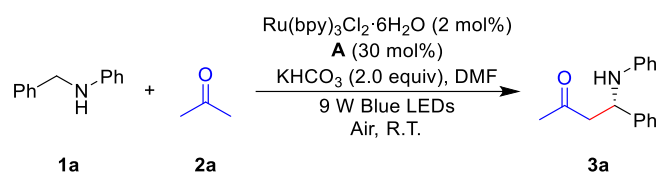

| Entry            | <b>2a</b> [equiv] | Yield [%] <sup>[b]</sup> | ee [%] <sup>[c]</sup> |
|------------------|-------------------|--------------------------|-----------------------|
| 1                | 5.0               | 50                       | 96                    |
| 2                | 10.0              | 56                       | 95                    |
| 3                | 15.0              | 60                       | 97                    |
| <b>4</b>         | <b>20.0</b>       | <b>65</b>                | <b>97</b>             |
| 5 <sup>[d]</sup> | 20.0              | 57                       | 97                    |
| 6                | 25.0              | 65                       | 97                    |
| 7                | 30.0              | 65                       | 97                    |
| 8                | 40.0              | 61                       | 97                    |
| 9                | 50.0              | 56                       | 94                    |

[a] Reaction conditions: **1a** (55 mg, 0.3 mmol, 1.0 equiv) and Ru(bpy)<sub>3</sub>Cl<sub>2</sub>·6H<sub>2</sub>O (4 mg, 0.006 mmol, 2 mol%) in DMF (dried over 3Å molecular sieves, 2.0 mL) irradiated with 9 W blue LEDs under air at room temperature. After full conversion of **1a**, the light was turned off. **2a** (dried over 3Å molecular sieves), **A** (11 mg, 0.09 mmol, 30 mol%) and KHCO<sub>3</sub> (60 mg, 0.6 mmol, 2.0 equiv) were added. [b] Isolated yield. [c] Determined by HPLC analysis using a chiralpak AD-H column. [d] All components were added at one time and irradiation.

**Table S10.** Screening of additives (for the reaction using cyclohexanone).<sup>[a]</sup>



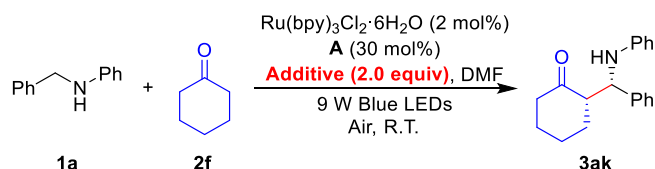

| Entry    | Additive                        | Yield [%] <sup>[b]</sup> | dr [ <i>syn/anti</i> ] <sup>[c]</sup> | ee [% [ <i>syn</i> ]/% [ <i>anti</i> ]] <sup>[c]</sup> |
|----------|---------------------------------|--------------------------|---------------------------------------|--------------------------------------------------------|
| 1        | None                            | 45                       | 37/63                                 | 50/19                                                  |
| 2        | K <sub>2</sub> CO <sub>3</sub>  | 63                       | 58/42                                 | 75/35                                                  |
| 3        | Na <sub>2</sub> CO <sub>3</sub> | 69                       | 51/49                                 | 72/29                                                  |
| 4        | Cs <sub>2</sub> CO <sub>3</sub> | 51                       | 54/46                                 | 85/79                                                  |
| 5        | KHCO <sub>3</sub>               | 74                       | 55/45                                 | 80/43                                                  |
| <b>6</b> | <b>KOH</b>                      | <b>74</b>                | <b>62/38</b>                          | <b>87/58</b>                                           |

[a] Reaction conditions: **1a** (55 mg, 0.3 mmol, 1.0 equiv) and Ru(bpy)<sub>3</sub>Cl<sub>2</sub>·6H<sub>2</sub>O (4 mg, 0.006 mmol, 2 mol%) in DMF (dried over 3Å molecular sieves, 2.0 mL) irradiated with 9 W blue LEDs under air at room temperature. After full conversion of **1a**, the light was turned off. **2f** (156 μL, 1.5 mmol, 5.0 equiv), **A** (11 mg, 0.09 mmol, 30 mol%) and additive (0.6 mmol, 2.0 equiv) were added. [b] Isolated yield. [c] Determined by HPLC analysis using a chiralpak OJ-H column.

**Table S11.** Screening of the amounts of KOH (for the reaction using cyclohexanone).<sup>[a]</sup>

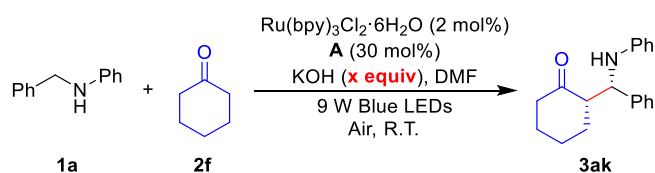

| Entry    | KOH (equiv) | Yield [%] <sup>[b]</sup> | dr [ <i>syn/anti</i> ] <sup>[c]</sup> | ee [% [ <i>syn</i> ]/% [ <i>anti</i> ]] <sup>[c]</sup> |
|----------|-------------|--------------------------|---------------------------------------|--------------------------------------------------------|
| 1        | 0.3         | 68                       | 48/52                                 | 60/27                                                  |
| 2        | 0.6         | 73                       | 56/44                                 | 60/27                                                  |
| 3        | 0.9         | 72                       | 42/58                                 | 65/33                                                  |
| 4        | 1.5         | 73                       | 56/44                                 | 76/26                                                  |
| <b>5</b> | <b>2.0</b>  | <b>74</b>                | <b>62/38</b>                          | <b>87/58</b>                                           |
| 6        | 2.5         | 73                       | 54/46                                 | 81/48                                                  |

[a] Reaction conditions: **1a** (55 mg, 0.3 mmol, 1.0 equiv) and Ru(bpy)<sub>3</sub>Cl<sub>2</sub>·6H<sub>2</sub>O (4 mg, 0.006 mmol, 2 mol%) in DMF (dried over 3Å molecular sieves, 2.0 mL) irradiated with 9 W blue LEDs

under air at room temperature. After full conversion of **1a**, the light was turned off. **2f** (156  $\mu$ L, 1.5 mmol, 5.0 equiv), **A** (11 mg, 0.09 mmol, 30 mol%) and KOH were added. [b] Isolated yield. [c] Determined by HPLC analysis using a chiralpak OJ-H column.

## 6. Scale-up experiments

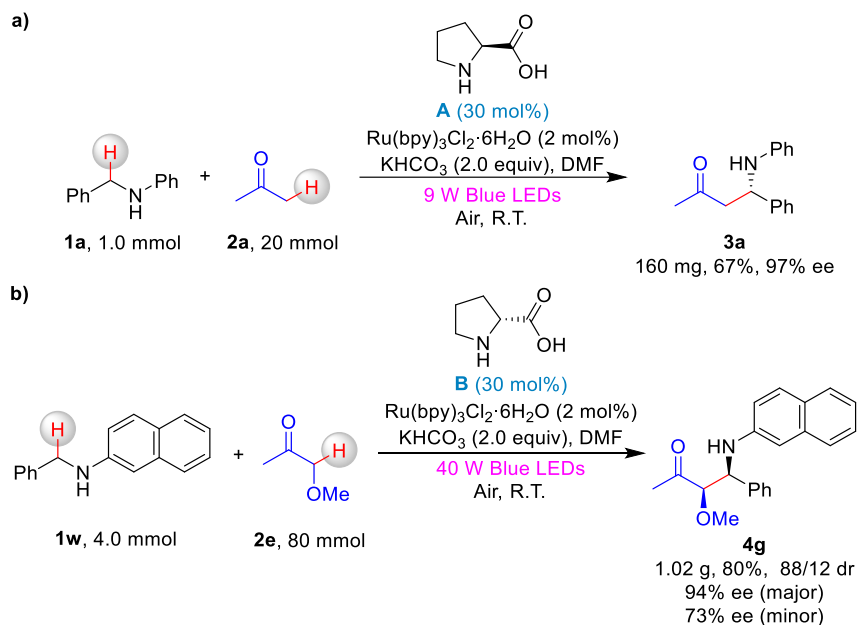

**Figure S2.** Scale-up experiments.

Reaction conditions:

a) **1a** (183 mg, 1.0 mmol, 1.0 equiv) and Ru(bpy)<sub>3</sub>Cl<sub>2</sub>·6H<sub>2</sub>O (13 mg, 0.02 mmol, 2 mol%) in DMF (dried over 3Å molecular sieves, 7 mL) irradiated with 9 W blue LEDs under air at room temperature for 17 h. Then, the light was turned off. **2a** (1.5 mL, 20 mmol, 20.0 equiv), **A** (34 mg, 0.3 mmol, 30 mol%) and KHCO<sub>3</sub> (200 mg, 2.0 mmol, 2.0 equiv) were added at room temperature for 24 h.

b) **1w** (933 mg, 4.0 mmol, 1.0 equiv) and Ru(bpy)<sub>3</sub>Cl<sub>2</sub>·6H<sub>2</sub>O (51 mg, 0.08 mmol, 2 mol%) in DMF (dried over 3Å molecular sieves, 27 mL) irradiated with 40 W blue LEDs under air at room temperature for 16 h. Then, the light was turned off. **2e** (7.4 mL, 80 mmol, 20.0 equiv), **B** (138 mg, 1.2 mmol, 30 mol%) and KHCO<sub>3</sub> (801 mg, 8.0 mmol, 2.0 equiv) were added at room temperature for 19 h.

Isolated yield, ee and dr of products were determined by chiral HPLC analysis

## 7. Crystallographic data of compound 3a

Crystallographic data (excluding structure factors) for the structure reported in this work has been deposited with the Cambridge Crystallographic Data Centre as supplementary publication no. **CCDC 2217984**. Copy of the data can be obtained free of charge on application to The director, CCDC, 12 Union Road, Cambridge DB21EZ, UK (fax: + 44 (1223) 336033; e-mail: deposit@ccdc.cam.ac.uk).

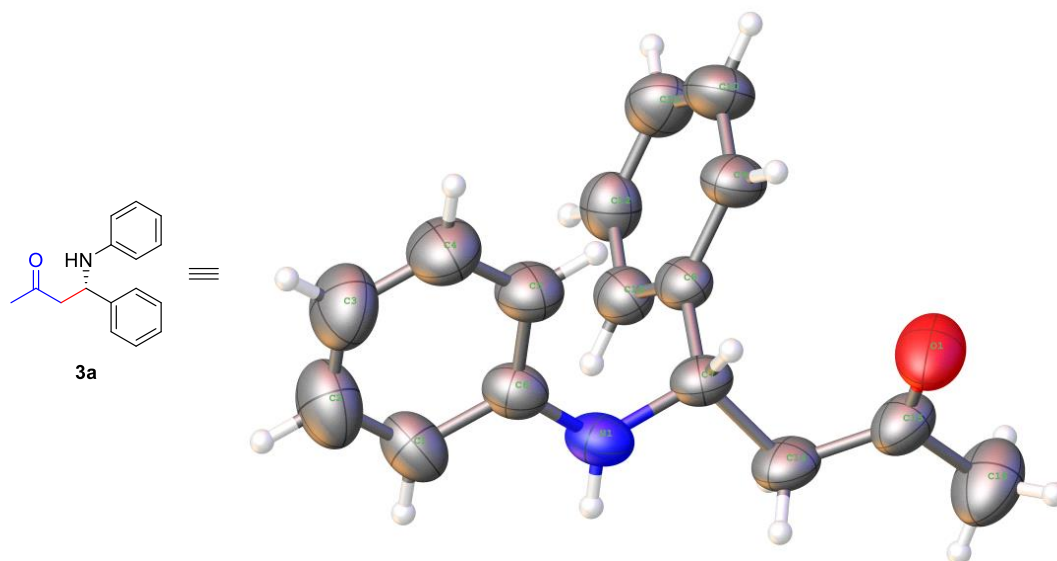

**Table S12.** Crystal data and structure refinement for **3a**.

|                     |                                    |
|---------------------|------------------------------------|
| Identification code | gz-6-14                            |
| Empirical formula   | C <sub>16</sub> H <sub>17</sub> NO |
| Formula weight      | 239.30                             |
| Temperature/K       | 289 (1)                            |
| Crystal system      | monoclinic                         |
| Space group         | P2 <sub>1</sub>                    |
| a/Å                 | 6.1534 (5)                         |
| b/Å                 | 14.2426 (10)                       |
| c/Å                 | 7.9499 (6)                         |
| $\alpha$ /°         | 90                                 |
| $\beta$ /°          | 93.172 (7)                         |

|                                               |                                                               |
|-----------------------------------------------|---------------------------------------------------------------|
| $\gamma/^\circ$                               | 90                                                            |
| Volume/ $\text{\AA}^3$                        | 695.66 (9)                                                    |
| Z                                             | 2                                                             |
| $\rho_{\text{calc}}/\text{cm}^3$              | 1.142                                                         |
| $\mu/\text{mm}^{-1}$                          | 0.554                                                         |
| F(000)                                        | 256.0                                                         |
| Crystal size/ $\text{mm}^3$                   | $0.44 \times 0.43 \times 0.21$                                |
| Radiation                                     | CuK $\alpha$ ( $\lambda = 1.54184$ )                          |
| $2\Theta$ range for data collection/ $^\circ$ | 11.146 to 143.44                                              |
| Index ranges                                  | $-7 \leq h \leq 6, -17 \leq k \leq 16, -9 \leq l \leq 9$      |
| Reflections collected                         | 6709                                                          |
| Independent reflections                       | 2605 [ $R_{\text{int}} = 0.0768, R_{\text{sigma}} = 0.0578$ ] |
| Data/restraints/parameters                    | 2605/1/164                                                    |
| Goodness-of-fit on $F^2$                      | 1.058                                                         |
| Final R indexes [ $I \geq 2\sigma(I)$ ]       | $R_1 = 0.0763, wR_2 = 0.2125$                                 |
| Final R indexes [all data]                    | $R_1 = 0.0827, wR_2 = 0.2356$                                 |
| Largest diff. peak/hole / $e \text{\AA}^{-3}$ | 0.21/-0.35                                                    |
| Flack parameter                               | -0.1 (8)                                                      |

**Table S13.** Fractional atomic coordinates ( $\times 10^4$ ) and equivalent isotropic displacement parameters ( $\text{\AA}^2 \times 10^3$ ) for **3a**.  $U_{\text{eq}}$  is defined as 1/3 of the trace of the orthogonalised  $U_{\text{IJ}}$  tensor.

| Atom | $x$         | $y$       | $z$        | U (eq)    |
|------|-------------|-----------|------------|-----------|
| O1   | -1010 (7)   | -2981 (3) | -1991 (8)  | 95.1 (15) |
| N1   | -7142 (7)   | -4154 (3) | -2719 (5)  | 60.3 (10) |
| C1   | -9761 (9)   | -5344 (5) | -3497 (7)  | 72.8 (14) |
| C2   | -10316 (12) | -6277 (6) | -3778 (11) | 96 (2)    |
| C3   | -8797 (12)  | -6974 (6) | -3494 (11) | 100 (2)   |
| C4   | -6702 (12)  | -6745 (4) | -2916 (9)  | 86.0 (17) |

|     |            |           |            |           |
|-----|------------|-----------|------------|-----------|
| C5  | -6121 (10) | -5815 (4) | -2610 (7)  | 70.4 (12) |
| C6  | -7655 (8)  | -5099 (4) | -2905 (5)  | 57.1 (10) |
| C7  | -5111 (7)  | -3834 (3) | -1881 (5)  | 54.1 (9)  |
| C8  | -4952 (7)  | -4052 (3) | -1 (5)     | 52.5 (9)  |
| C9  | -3038 (8)  | -4443 (4) | 723 (6)    | 61.8 (11) |
| C10 | -2878 (9)  | -4626 (4) | 2440 (7)   | 74.6 (14) |
| C11 | -4539 (9)  | -4407 (4) | 3437 (6)   | 72.1 (13) |
| C12 | -6432 (8)  | -4014 (4) | 2733 (6)   | 65.9 (12) |
| C13 | -6622 (8)  | -3834 (3) | 1012 (6)   | 58.6 (10) |
| C14 | -4818 (9)  | -2788 (3) | -2235 (7)  | 65.2 (12) |
| C15 | -2525 (9)  | -2452 (4) | -1968 (7)  | 66.9 (12) |
| C16 | -2157 (14) | -1411 (5) | -1775 (13) | 104 (2)   |

**Table S14.** Anisotropic displacement parameters ( $\text{\AA}^2 \times 10^3$ ) for **3a**. The anisotropic displacement factor exponent takes the form:  $-2\pi^2[h^2a^*2U_{11}+2hka^*b^*U_{12}+\dots]$ .

| Atom | $U_{11}$ | $U_{22}$  | $U_{33}$  | $U_{23}$  | $U_{13}$  | $U_{12}$  |
|------|----------|-----------|-----------|-----------|-----------|-----------|
| O1   | 69 (2)   | 61 (2)    | 156 (4)   | 11 (3)    | 20 (3)    | 15.5 (18) |
| N1   | 61 (2)   | 54 (2)    | 64.0 (18) | -0.3 (17) | -7.1 (16) | 16.0 (17) |
| C1   | 59 (2)   | 81 (3)    | 77 (3)    | -15 (3)   | -6 (2)    | 5 (2)     |
| C2   | 78 (4)   | 93 (5)    | 116 (5)   | -25 (4)   | 2 (3)     | -16 (3)   |
| C3   | 98 (5)   | 72 (4)    | 129 (6)   | -13 (4)   | 4 (4)     | -17 (4)   |
| C4   | 89 (4)   | 59 (3)    | 109 (4)   | 2 (3)     | -4 (3)    | 9 (3)     |
| C5   | 69 (3)   | 57 (3)    | 84 (3)    | 3 (2)     | -3 (2)    | 11 (2)    |
| C6   | 61 (2)   | 56 (2)    | 53.6 (18) | -4.3 (18) | -2.9 (17) | 10.0 (19) |
| C7   | 59 (2)   | 43.9 (19) | 58.8 (19) | 6.6 (17)  | 0.4 (16)  | 9.4 (17)  |
| C8   | 57 (2)   | 40.0 (18) | 60.1 (19) | 1.2 (17)  | -4.6 (16) | 1.9 (16)  |
| C9   | 57 (2)   | 61 (3)    | 67 (2)    | 10 (2)    | -3.0 (17) | 12.2 (19) |
| C10  | 75 (3)   | 75 (3)    | 72 (3)    | 13 (3)    | -17 (2)   | 5 (3)     |

|     |         |        |         |        |           |          |
|-----|---------|--------|---------|--------|-----------|----------|
| C11 | 83 (3)  | 74 (3) | 58 (2)  | 5 (2)  | -5 (2)    | -5 (3)   |
| C12 | 66 (2)  | 66 (3) | 65 (2)  | -6 (2) | 4.7 (19)  | -7 (2)   |
| C13 | 59 (2)  | 48 (2) | 68 (2)  | 0 (2)  | -2.9 (18) | 1.9 (19) |
| C14 | 69 (3)  | 46 (2) | 81 (3)  | 11 (2) | 4 (2)     | 16 (2)   |
| C15 | 72 (3)  | 48 (2) | 81 (3)  | 10 (2) | 14 (2)    | 5 (2)    |
| C16 | 104 (5) | 58 (3) | 152 (7) | -2 (4) | 30 (5)    | 0 (3)    |

**Table S15.** Bond lengths for **3a**.

| Atom | Atom | Length/Å   |
|------|------|------------|
| O1   | C15  | 1.200 (6)  |
| N1   | C6   | 1.388 (7)  |
| N1   | C7   | 1.456 (6)  |
| C1   | C2   | 1.387 (10) |
| C1   | C6   | 1.399 (7)  |
| C2   | C3   | 1.374 (12) |
| C3   | C4   | 1.384 (10) |
| C4   | C5   | 1.389 (9)  |
| C5   | C6   | 1.401 (7)  |
| C7   | C8   | 1.524 (6)  |
| C7   | C14  | 1.529 (6)  |
| C8   | C9   | 1.398 (6)  |
| C8   | C13  | 1.376 (7)  |
| C9   | C10  | 1.388 (7)  |
| C10  | C11  | 1.364 (9)  |
| C11  | C12  | 1.383 (8)  |
| C12  | C13  | 1.391 (7)  |
| C14  | C15  | 1.494 (8)  |
| C15  | C16  | 1.506 (8)  |

**Table S16.** Bond angles for **3a**.

| Atom | Atom | Atom | Angle/°   |
|------|------|------|-----------|
| C6   | N1   | C7   | 122.4 (3) |
| C2   | C1   | C6   | 120.6 (6) |
| C3   | C2   | C1   | 120.5 (6) |
| C2   | C3   | C4   | 119.8 (7) |
| C3   | C4   | C5   | 120.7 (6) |
| C4   | C5   | C6   | 120.0 (6) |
| N1   | C6   | C1   | 118.6 (4) |
| N1   | C6   | C5   | 122.8 (5) |
| C1   | C6   | C5   | 118.5 (5) |
| N1   | C7   | C8   | 113.1 (4) |
| N1   | C7   | C14  | 109.1 (4) |
| C8   | C7   | C14  | 112.1 (4) |
| C9   | C8   | C7   | 119.5 (4) |
| C13  | C8   | C7   | 121.2 (4) |
| C13  | C8   | C9   | 119.3 (4) |
| C10  | C9   | C8   | 119.5 (5) |
| C11  | C10  | C9   | 120.9 (5) |
| C10  | C11  | C12  | 119.9 (5) |
| C11  | C12  | C13  | 119.7 (5) |
| C8   | C13  | C12  | 120.6 (4) |
| C15  | C14  | C7   | 114.0 (4) |
| O1   | C15  | C14  | 121.7 (5) |
| O1   | C15  | C16  | 120.5 (6) |
| C14  | C15  | C16  | 117.8 (5) |

**Table S17.** Hydrogen Atom Coordinates ( $\text{\AA}\times 10^4$ ) and Isotropic Displacement Parameters ( $\text{\AA}^2\times 10^3$ ) for **3a**.

| Atom | <i>x</i> | <i>y</i> | <i>z</i> | U (eq) |
|------|----------|----------|----------|--------|
| H1   | -8057    | -3742    | -3112    | 72     |
| H1A  | -10799   | -4877    | -3705    | 87     |
| H2   | -11725   | -6432    | -4162    | 115    |
| H3   | -9176    | -7599    | -3688    | 120    |
| H4   | -5673    | -7217    | -2731    | 103    |
| H5   | -4713    | -5669    | -2209    | 84     |
| H7   | -3923    | -4169    | -2393    | 65     |
| H9   | -1880    | -4579    | 59       | 74     |
| H10  | -1621    | -4903    | 2917     | 90     |
| H11  | -4398    | -4521    | 4590     | 87     |
| H12  | -7574    | -3871    | 3408     | 79     |
| H13  | -7890    | -3563    | 541      | 70     |
| H14A | -5317    | -2661    | -3391    | 78     |
| H14B | -5731    | -2432    | -1509    | 78     |
| H16A | -1848    | -1264    | -608     | 155    |
| H16B | -3439    | -1080    | -2182    | 155    |
| H16C | -948     | -1226    | -2413    | 155    |

### Experimental

Single crystals of  $\text{C}_{16}\text{H}_{17}\text{NO}$  [**3a**] were obtained by slow evaporation of the solvent from a petroleum ether and EtOAc (v/v, 25/1) solution of **3a**. A suitable crystal was selected and [] on a SuperNova, Dual, Cu at home/near, EosS2 diffractometer. The crystal was kept at 289 (1) K during data collection. Using Olex2 [1], the structure was solved with the Superflip [2] structure solution program using Charge Flipping and refined with the ShelXL [3] refinement package using Least Squares minimisation.



1. Dolomanov, O.V., Bourhis, L.J., Gildea, R.J., Howard, J.A.K. & Puschmann, H. (2009), *J. Appl. Cryst.* 42, 339-341.
2. Palatinus, L. & Chapuis, G. (2007). *J. Appl. Cryst.*, 40, 786-790; Palatinus, L. & van der Lee, A. (2008). *J. Appl. Cryst.* 41, 975-984; Palatinus, L., Prathapa, S. J. & van Smaalen, S. (2012). *J. Appl. Cryst.* 45, 575-580.
3. Sheldrick, G.M. (2015). *Acta Cryst.* C71, 3-8.

### Crystal structure determination of 3a

**Crystal Data** for  $C_{16}H_{17}NO$  ( $M = 239.30$  g/mol): monoclinic, space group  $P2_1$  (no. 4),  $a = 6.1534$  (5) Å,  $b = 14.2426$  (10) Å,  $c = 7.9499$  (6) Å,  $\beta = 93.172$  (7)°,  $V = 695.66$  (9) Å<sup>3</sup>,  $Z = 2$ ,  $T = 289$  (1) K,  $\mu$  (CuK $\alpha$ ) = 0.554 mm<sup>-1</sup>,  $D_{calc} = 1.142$  g/cm<sup>3</sup>, 6709 reflections measured ( $11.146^\circ \leq 2\theta \leq 143.44^\circ$ ), 2605 unique ( $R_{int} = 0.0768$ ,  $R_{sigma} = 0.0578$ ) which were used in all calculations. The final  $R_1$  was 0.0763 ( $I > 2\sigma(I)$ ) and  $wR_2$  was 0.2356 (all data).

### Refinement model description

Number of restraints - 1, number of constraints - unknown.

Details:

1. Fixed Uiso

At 1.2 times of:

All C (H) groups, All C (H, H) groups, All N (H) groups

At 1.5 times of:

All C (H, H, H) groups

2.a Ternary CH refined with riding coordinates:

C7 (H7)

2.b Secondary CH2 refined with riding coordinates:

C14 (H14A, H14B)

2.c Aromatic/amide H refined with riding coordinates:

N1 (H1), C1 (H1A), C2 (H2), C3 (H3), C4 (H4), C5 (H5), C9 (H9), C10 (H10), C11 (H11), C12 (H12), C13 (H13)

2.d Idealised Me refined as rotating group:

C16 (H16A, H16B, H16C)

## 8. Stern-Volmer luminescence quenching experiments

The measurements were performed using a 0.05 mM solution of Ru(bpy)<sub>3</sub>Cl<sub>2</sub>·6H<sub>2</sub>O in DMF with varying concentration of a quencher. The samples were excited at 450 nm and emission intensity was recorded at 622 nm. The results revealed that **1a** could significantly quench Ru(bpy)<sub>3</sub><sup>2+</sup> (Figure S3, Figure S4).

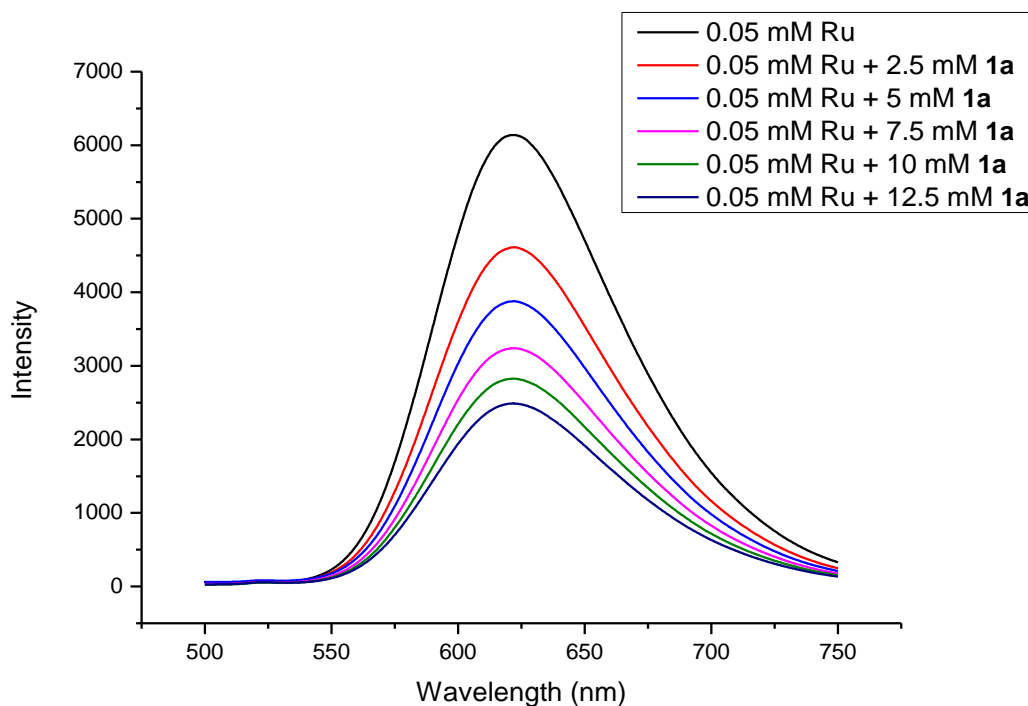

**Figure S3.** Fluorescence quenching of 0.05 mM Ru(bpy)<sub>3</sub>Cl<sub>2</sub>·6H<sub>2</sub>O (in DMF) by increasing concentration of **1a**.

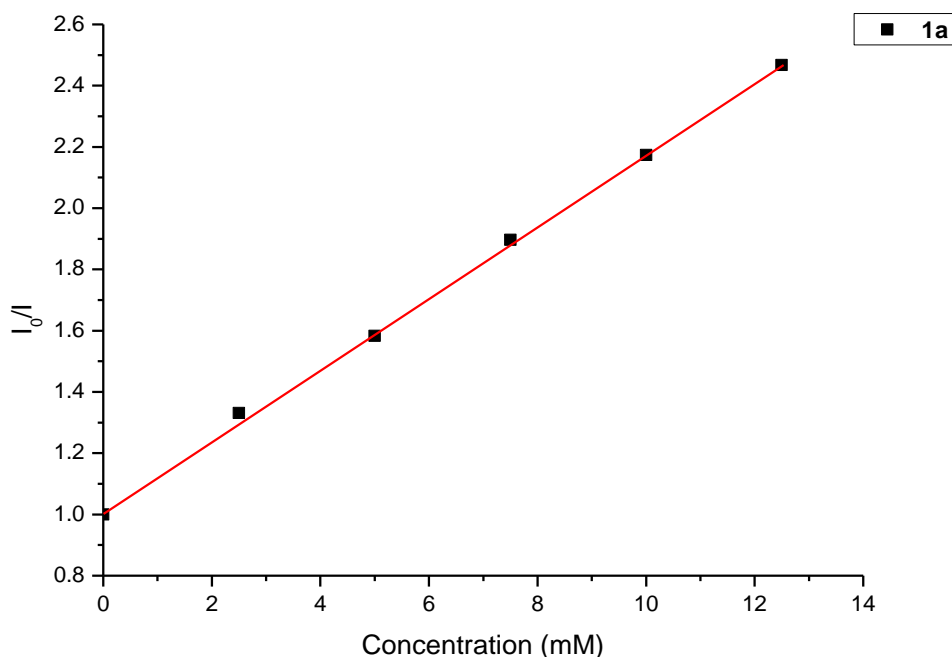

**Figure S4.** Stern-Volmer plots of fluorescence quenching 0.05 mM Ru(bpy)<sub>3</sub>Cl<sub>2</sub>·6H<sub>2</sub>O (in DMF) by **1a**.

## 9. Cyclic voltammetry studies

The cyclic voltammetry experiments were performed in a three-electrode undivided cell, and were recorded with a CHI 700E potentiostat (CH Instruments, Inc.) at room temperature in DMF or MeCN (15 mL). *n*-Bu<sub>4</sub>NPF<sub>6</sub> (0.05 M) was used as the supporting electrolyte, and the concentration of the tested compound was 2.0 mM. The scan rate was 100 mV/s. The potential ranges investigated for oxidations were 0 to +4.5 V vs. SCE (saturated aqueous KCl). CV plotting convention is IUPAC.

**Working electrode:** The working electrode is a 3 mm diameter glassy carbon working electrode. Polished with 0.05 μm aluminum oxide and then sonicated in distilled water and ethanol before measurements.

**Reference electrode:** The reference electrode is SCE (saturated aqueous KCl) that was washed with water and ethanol before measurements.

**Counter electrode:** The counter electrode is a platinum wire that was polished with 0.05 μm aluminum oxide and then sonicated in distilled water and ethanol before measurements.

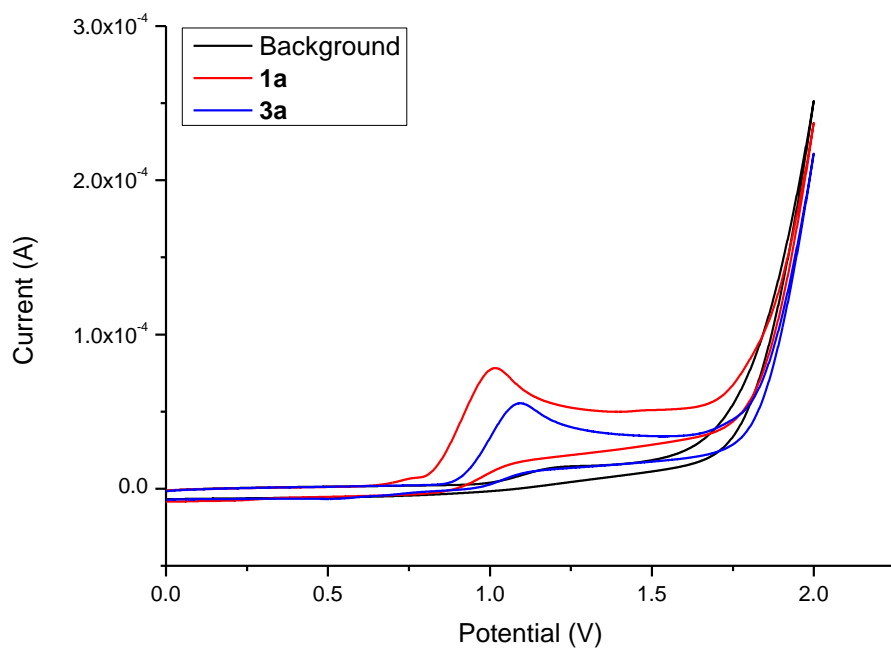

**Figure S5.** Cyclic voltammograms of background, **1a** (2 mM) and **3a** (2 mM) in an electrolyte of *n*-Bu<sub>4</sub>NPF<sub>6</sub> (0.05 mM) in DMF from 0 to +2.0 V. The onset potential for the oxidation of **1a** is around +0.70 V and the  $E_{ox}$  is approximately +1.02 V. The onset potential for the oxidation of **3a** is around +0.86 V and the  $E_{ox}$  is approximately +1.09 V.

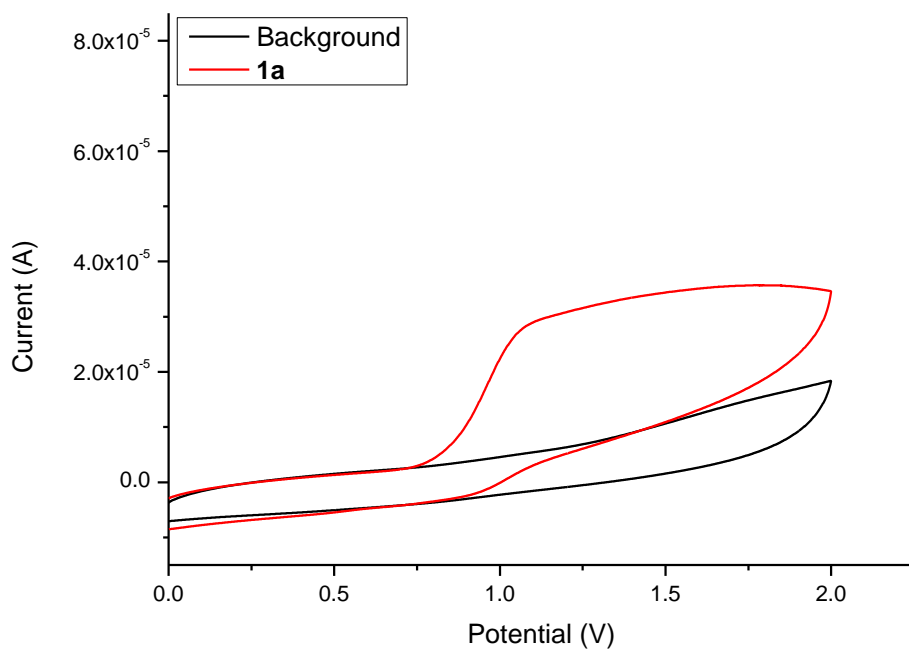

**Figure S6.** Cyclic voltammograms of background and **1a** (2 mM) in an electrolyte of *n*-Bu<sub>4</sub>NPF<sub>6</sub> (0.05 mM) in MeCN from 0 to +2.0 V. The onset potential for the oxidation of **1a** is around +0.72 V and the E<sub>ox</sub> is approximately +1.07 V.

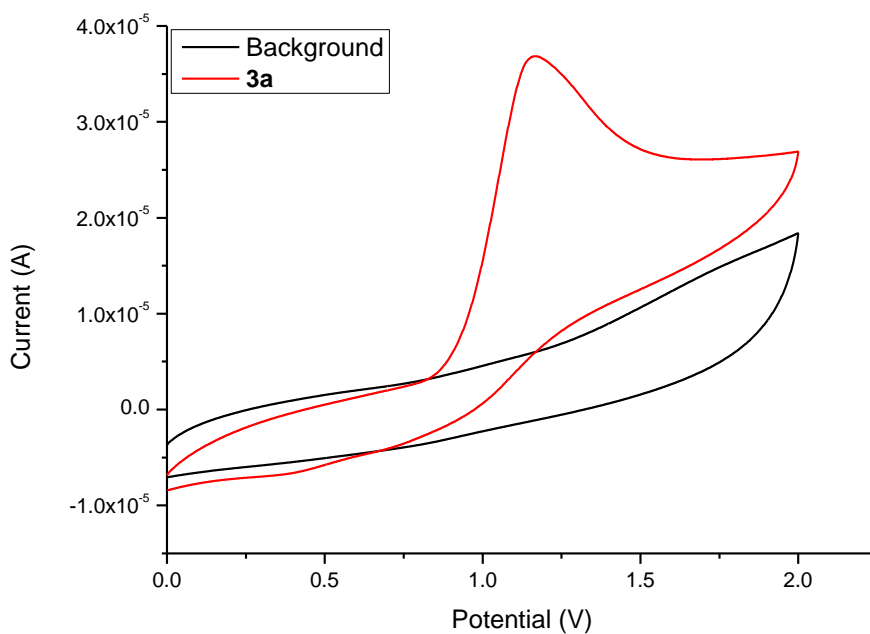

**Figure S7.** Cyclic voltammograms of background and **3a** (2 mM) in an electrolyte of *n*-Bu<sub>4</sub>NPF<sub>6</sub> (0.05 mM) in MeCN from 0 to +2.0 V. The onset potential for the oxidation of **3a** is around +0.86 V and the E<sub>ox</sub> is approximately +1.15 V.

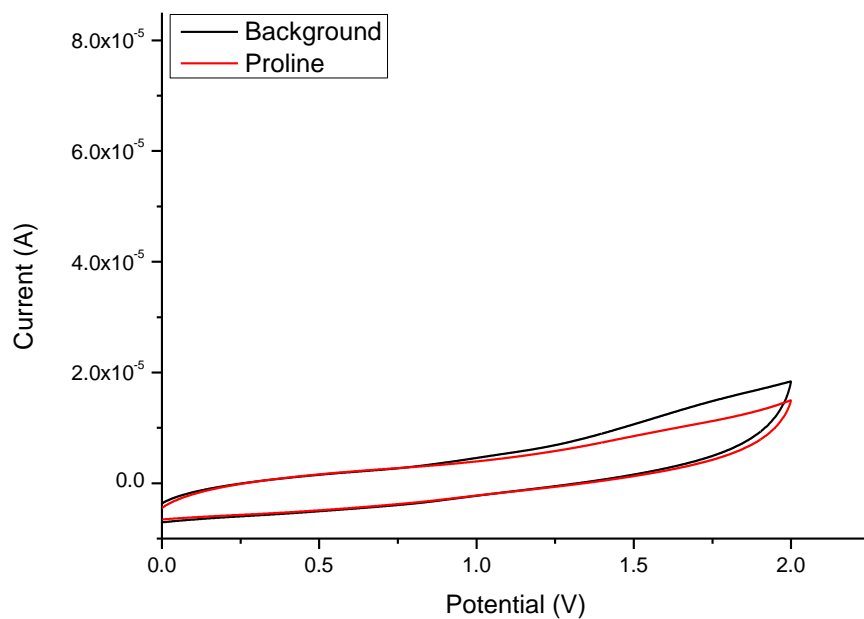

**Figure S8.** Cyclic voltammograms of background and proline (2 mM) in an electrolyte of *n*-Bu<sub>4</sub>NPF<sub>6</sub> (0.05 mM) in MeCN from 0 to +2.0 V. Proline has no oxidation peak in this range.

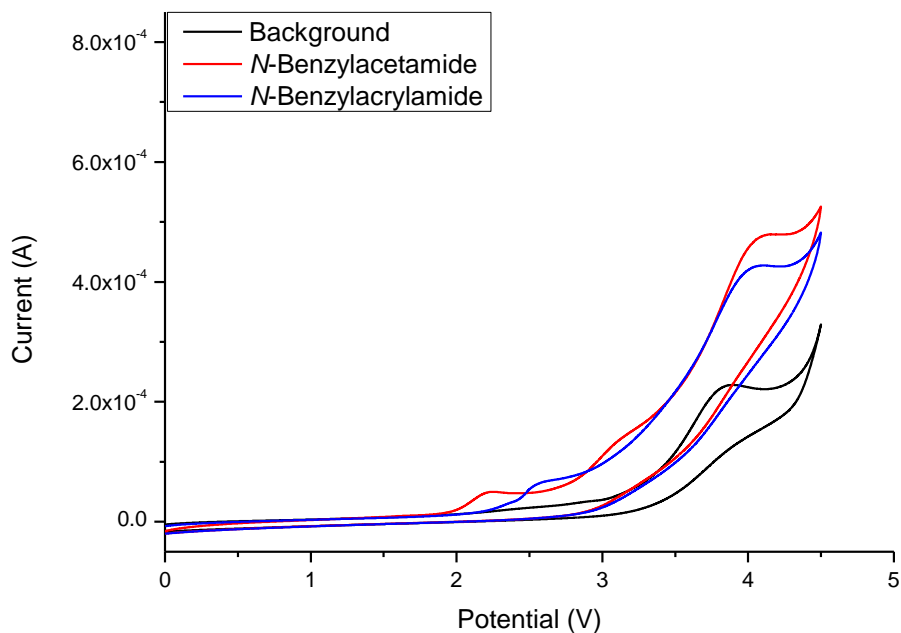

**Figure S9.** Cyclic voltammograms of background, *N*-benzylacetamide (2 mM) and *N*-benzylacrylamide (2 mM) in an electrolyte of *n*-Bu<sub>4</sub>NPF<sub>6</sub> (0.05 mM) in MeCN from 0 to +4.5 V. The onset potential for the oxidation of *N*-benzylacetamide is around +1.89 V and the E<sub>ox</sub> is

approximately +2.20 V. The onset potential for the oxidation of *N*-benzylacrylamide is around +2.23 V and the  $E_{\text{ox}}$  is approximately +2.56 V.

## 10. Unsuccessful substrates

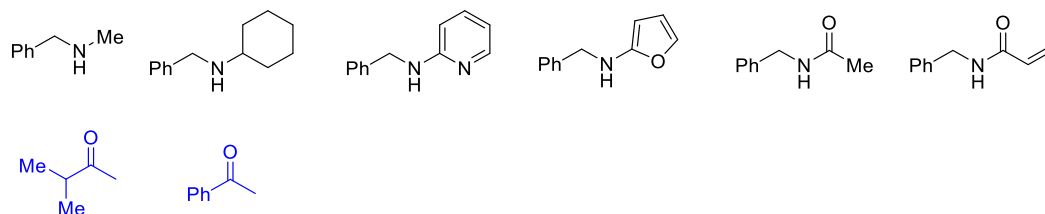

**Figure S10.** Unsuccessful substrates.

## 11. Possible mechanism for the reaction without $\text{KHCO}_3$

A possible mechanism for the reaction without  $\text{KHCO}_3$  was proposed, as illustrated in Figure S11. Initially, the visible light irradiation of Ru(II) generates the excited state  $^*\text{Ru}(\text{II})$ . A subsequent SET between  $^*\text{Ru}(\text{II})$  and **1a** produces Ru(I) and the N-centered radical cation **I**. Ru(I) is oxidized by  $\text{O}_2$  to regenerate Ru(II), and the active species superoxide anion  $\text{O}_2^{\cdot-}$  is produced at the same time. Next,  $\text{O}_2^{\cdot-}$  abstracts a hydrogen atom from **I** to generate the iminium ion **II**, which deprotonates to afford the imine **III**. Meanwhile, in the *L*-proline catalysis cycle, **2a** is converted to enamine **VII** in the presence of catalyst **A**. The acidic proton of *L*-proline can activate intermediate **III** through a hydrogen bond.<sup>[8]</sup> Subsequently, the nucleophilic attack of **VII** to the imine **III** via **VIII-a** from the *Si* face may be more favorable due to the more suitable position for the C-C bond formation (**VIII-a**),<sup>[9,10]</sup> thus leading to the target product **3a** with the *S*-configuration in good stereoselectivity.

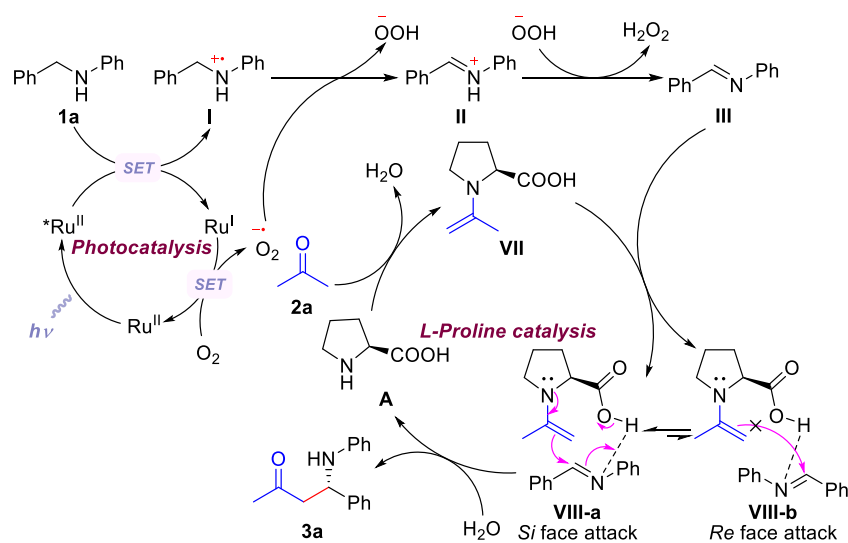

**Figure S11** Possible mechanism for the reaction without  $\text{KHCO}_3$ .

## 12. Characterization data of the products 3 and 4

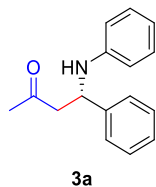

### (S)-4-phenyl-4-(phenylamino)butan-2-one (3a)<sup>[1]</sup>

Followed the general procedure (Irradiation was conducted for 17 h, followed by the asymmetric catalytic reaction for 24 h).

47 mg, 65% yield, white solid.

**Enantiomeric excess (ee):** 97%.

$[\alpha]_D^{20} = +20.0^\circ$  ( $c = 0.20$ ,  $\text{CHCl}_3$ ).

$R_f = 0.40$  (Petroleum ether/EtOAc, v/v, 5:1).

**<sup>1</sup>H NMR (600 MHz, CDCl<sub>3</sub>):**  $\delta$  7.36 (d,  $J = 7.3$  Hz, 2H), 7.31 (t,  $J = 7.6$  Hz, 2H), 7.23 (t,  $J = 7.3$  Hz, 1H), 7.11 – 7.07 (m, 2H), 6.66 (t,  $J = 7.3$  Hz, 1H), 6.54 (d,  $J = 7.7$  Hz, 2H), 4.84 (t,  $J = 6.5$  Hz, 1H), 4.43 (br s, 1H), 2.92 (d,  $J = 6.5$  Hz, 2H), 2.09 (s, 3H).

**<sup>13</sup>C NMR (151 MHz, CDCl<sub>3</sub>):**  $\delta$  207.1, 146.8, 142.5, 129.1, 128.8, 127.4, 126.3, 117.9, 113.8, 54.4, 51.2, 30.7.

**HPLC:** Daicel Chiralpak AD-H, hexane/isopropanol = 97:3, flow rate 1.0 mL/min,  $\lambda = 254$  nm), retention time: 20.194 min (major), 14.566 min (minor).

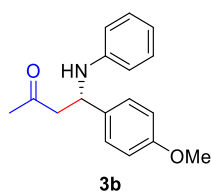

### (S)-4-(4-methoxyphenyl)-4-(phenylamino)butan-2-one (3b)<sup>[1]</sup>

Followed the general procedure (Irradiation was conducted for 17 h, followed by the asymmetric catalytic reaction for 24 h).

58 mg, 72% yield, yellow oil.

**Enantiomeric excess (ee):** 90%.

$[\alpha]_D^{20} = +11.2^\circ$  ( $c = 0.80$ ,  $\text{CHCl}_3$ ).

$R_f = 0.40$  (Petroleum ether/EtOAc, v/v, 5:1).



**<sup>1</sup>H NMR (400 MHz, CDCl<sub>3</sub>):** δ 7.27 (d, *J* = 8.5 Hz, 2H), 7.09 (t, *J* = 7.8 Hz, 2H), 6.84 (d, *J* = 8.4 Hz, 2H), 6.66 (t, *J* = 7.2 Hz, 1H), 6.54 (d, *J* = 7.8 Hz, 2H), 4.79 (t, *J* = 6.3 Hz, 1H), 4.43 (br s, 1H), 3.77 (s, 3H), 2.90 (d, *J* = 5.4 Hz, 2H), 2.08 (s, 3H).

**<sup>13</sup>C NMR (101 MHz, CDCl<sub>3</sub>):** δ 207.1, 158.9, 146.8, 134.5, 129.1, 127.4, 117.9, 114.2, 113.9, 55.2, 54.0, 51.2, 30.7.

**HRMS (ESI):** Calculated for C<sub>17</sub>H<sub>20</sub>NO<sub>2</sub> ([M+H]<sup>+</sup>): 270.1489. Found: 270.1488; Calculated for C<sub>17</sub>H<sub>19</sub>NNaO<sub>2</sub> ([M+Na]<sup>+</sup>): 292.1308, Found: 292.1308; Calculated for C<sub>17</sub>H<sub>19</sub>KNO<sub>2</sub> ([M+K]<sup>+</sup>): 308.1047, Found: 308.1046.

**HPLC:** Daicel Chiralpak AD-H, hexane/isopropanol = 97:3, flow rate 1.0 mL/min, λ = 254 nm, retention time: 28.909 min (major), 23.131 min (minor).

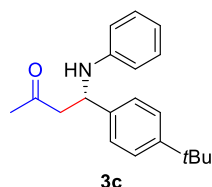

**(S)-4-(4-(*tert*-butyl)phenyl)-4-(phenylamino)butan-2-one (3c)**

Followed the general procedure (Irradiation was conducted for 17 h, followed by the asymmetric catalytic reaction for 24 h).

51 mg, 58% yield, yellow oil.

**Enantiomeric excess (ee):** 84%.

$[\alpha]_D^{20} = +25.2^\circ$  (*c* = 0.33, CHCl<sub>3</sub>).

*R<sub>f</sub>* = 0.60 (Petroleum ether/EtOAc, v/v, 5:1).

**<sup>1</sup>H NMR (600 MHz, CDCl<sub>3</sub>):** δ 7.32 (d, *J* = 8.0 Hz, 2H), 7.27 (d, *J* = 8.2 Hz, 2H), 7.10 (t, *J* = 7.6 Hz, 2H), 6.66 (t, *J* = 7.0 Hz, 1H), 6.56 (d, *J* = 8.1 Hz, 2H), 4.83 (t, *J* = 6.4 Hz, 1H), 4.41 (br s, 1H), 2.92 (d, *J* = 6.4 Hz, 2H), 2.09 (s, 3H), 1.29 (s, 9H).

**<sup>13</sup>C NMR (151 MHz, CDCl<sub>3</sub>):** δ 207.1, 150.2, 146.9, 139.4, 129.1, 125.9, 125.6, 117.8, 113.8, 54.0, 51.1, 34.4, 31.3, 30.6.

**HRMS (ESI):** Calculated for C<sub>20</sub>H<sub>26</sub>NO ([M+H]<sup>+</sup>): 296.2009. Found: 296.2009; Calculated for C<sub>20</sub>H<sub>25</sub>NNaO ([M+Na]<sup>+</sup>): 318.1828, Found: 318.1829; Calculated for C<sub>20</sub>H<sub>25</sub>KNO ([M+K]<sup>+</sup>): 334.1568, Found: 334.1569.

**HPLC:** Daicel Chiralpak AD-H, hexane/isopropanol = 99:1, flow rate 1.0 mL/min,  $\lambda = 254$  nm, retention time: 44.807 min (major), 20.985 min (minor).

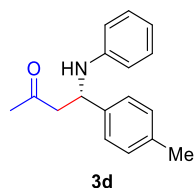

**(S)-4-(phenylamino)-4-(p-tolyl)butan-2-one (3d)**<sup>[11]</sup>

Followed the general procedure (Irradiation was conducted for 19 h, followed by the asymmetric catalytic reaction for 25 h).

41 mg, 54% yield, yellow oil.

**Enantiomeric excess (ee):** 84%.

$[\alpha]_D^{20} = +12.0^\circ$  ( $c = 0.50$ ,  $\text{CHCl}_3$ ).

$R_f = 0.50$  (Petroleum ether/EtOAc, v/v, 5:1).

**<sup>1</sup>H NMR (600 MHz,  $\text{CDCl}_3$ ):**  $\delta$  7.23 (d,  $J = 8.0$  Hz, 2H), 7.11 (d,  $J = 7.8$  Hz, 2H), 7.09 – 7.06 (m, 2H), 6.65 (t,  $J = 7.3$  Hz, 1H), 6.54 (d,  $J = 8.4$  Hz, 2H), 4.80 (t,  $J = 6.5$  Hz, 1H), 4.35 (br s, 1H), 2.89 (d,  $J = 6.5$  Hz, 2H), 2.30 (s, 3H), 2.07 (s, 3H).

**<sup>13</sup>C NMR (151 MHz,  $\text{CDCl}_3$ ):**  $\delta$  207.1, 146.9, 139.5, 137.0, 129.5, 129.1, 126.2, 117.8, 113.8, 54.2, 51.3, 30.7, 21.0.

**HPLC:** Daicel Chiralpak AD-H, hexane/isopropanol = 97:3, flow rate 1.0 mL/min,  $\lambda = 254$  nm, retention time: 16.794 min (major), 13.114 min (minor).

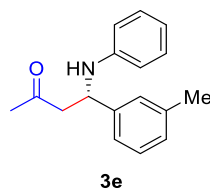

**(S)-4-(phenylamino)-4-(m-tolyl)butan-2-one (3e)**

Followed the general procedure (Irradiation was conducted for 19 h, followed by the asymmetric catalytic reaction for 25 h).

38 mg, 54% yield, yellow oil.

**Enantiomeric excess (ee):** 86%.

$[\alpha]_D^{20} = -6.0^\circ$  ( $c = 0.50$ ,  $\text{CHCl}_3$ ).

$R_f = 0.50$  (Petroleum ether/EtOAc, v/v, 5:1).

**$^1\text{H NMR}$  (600 MHz,  $\text{CDCl}_3$ ):**  $\delta$  7.19 (t,  $J = 7.4$  Hz, 1H), 7.16 – 7.13 (m, 2H), 7.10 – 7.06 (m, 2H), 7.03 (d,  $J = 7.4$  Hz, 1H), 6.65 (t,  $J = 7.3$  Hz, 1H), 6.54 (d,  $J = 7.8$  Hz, 2H), 4.79 (t,  $J = 6.5$  Hz, 1H), 4.36 (br s, 1H), 2.89 (d,  $J = 6.5$  Hz, 2H), 2.31 (s, 3H), 2.07 (s, 3H).

**$^{13}\text{C NMR}$  (101 MHz,  $\text{CDCl}_3$ ):**  $\delta$  207.1, 147.0, 142.6, 138.4, 129.2, 128.7, 128.2, 127.0, 123.3, 117.8, 113.8, 54.5, 51.3, 30.7, 21.5.

**HRMS (ESI):** Calculated for  $\text{C}_{17}\text{H}_{20}\text{NO}$  ( $[\text{M}+\text{H}]^+$ ): 254.1538. Found: 254.1538; Calculated for  $\text{C}_{17}\text{H}_{19}\text{NNaO}$  ( $[\text{M}+\text{Na}]^+$ ): 276.1359, Found: 276.1358; Calculated for  $\text{C}_{17}\text{H}_{19}\text{KNO}$  ( $[\text{M}+\text{K}]^+$ ): 292.1098, Found: 292.1097.

**HPLC:** Daicel Chiralpak AD-H, hexane/isopropanol = 97:3, flow rate 1.0 mL/min,  $\lambda = 254$  nm, retention time: 13.454 min (major), 11.026 min (minor).

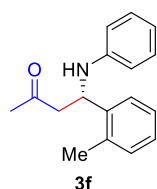

**(S)-4-(phenylamino)-4-(o-tolyl)butan-2-one (3f)**

Followed the general procedure (Irradiation was conducted for 19 h, followed by the asymmetric catalytic reaction for 25 h).

46 mg, 61% yield, yellow oil.

**Enantiomeric excess (ee):** 90%.

$[\alpha]_D^{20} = +14.0^\circ$  ( $c = 0.50$ ,  $\text{CHCl}_3$ ).

$R_f = 0.50$  (Petroleum ether/EtOAc, v/v, 5:1).

**$^1\text{H NMR}$  (600 MHz,  $\text{CDCl}_3$ ):**  $\delta$  7.37 – 7.34 (m, 1H), 7.18 – 7.13 (m, 3H), 7.10 – 7.06 (m, 2H), 6.65 (t,  $J = 7.3$  Hz, 1H), 6.48 (d,  $J = 7.8$  Hz, 2H), 5.03 (dd,  $J = 7.9, 5.2$  Hz, 1H), 4.34 (br s, 1H), 2.90 – 2.80 (m, 2H), 2.45 (s, 3H), 2.11 (s, 3H).

**$^{13}\text{C NMR}$  (151 MHz,  $\text{CDCl}_3$ ):**  $\delta$  207.1, 146.8, 140.2, 134.8, 130.9, 129.2, 127.2, 126.7, 125.6, 117.9, 113.6, 50.9, 49.6, 30.5, 19.1.

**HRMS (ESI):** Calculated for  $\text{C}_{17}\text{H}_{20}\text{NO}$  ( $[\text{M}+\text{H}]^+$ ): 254.1539. Found: 254.1538; Calculated for  $\text{C}_{17}\text{H}_{19}\text{NNaO}$  ( $[\text{M}+\text{Na}]^+$ ): 276.1359, Found: 276.1358; Calculated for  $\text{C}_{17}\text{H}_{19}\text{KNO}$  ( $[\text{M}+\text{K}]^+$ ): 292.1098, Found: 292.1100.

**HPLC:** Daicel Chiralpak AD-H, hexane/isopropanol = 97:3, flow rate 1.0 mL/min,  $\lambda = 254$  nm, retention time: 14.990 min (major), 11.345 min (minor).

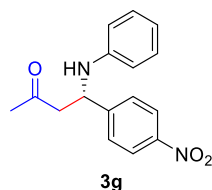

**(S)-4-(4-nitrophenyl)-4-(phenylamino)butan-2-one (3g)<sup>[12]</sup>**

Followed the general procedure (Irradiation was conducted for 17 h, followed by the asymmetric catalytic reaction for 23 h).

33 mg, 39% yield, yellow oil.

**Enantiomeric excess (ee):** 84%.

$[\alpha]_D^{20} = +13.3$  ( $c = 0.50$ ,  $\text{CHCl}_3$ ).

$R_f = 0.30$  (Petroleum ether/EtOAc, v/v, 3:1).

**<sup>1</sup>H NMR (600 MHz, CDCl<sub>3</sub>):**  $\delta$  8.17 (d,  $J = 8.5$  Hz, 2H), 7.56 (d,  $J = 8.5$  Hz, 2H), 7.12 – 7.07 (m, 2H), 6.70 (t,  $J = 7.1$  Hz, 1H), 6.49 (d,  $J = 8.0$  Hz, 2H), 4.93 (t,  $J = 6.1$  Hz, 1H), 4.47 (s, 1H), 2.97 (d,  $J = 6.1$  Hz, 2H), 2.14 (s, 3H).

**<sup>13</sup>C NMR (101 MHz, CDCl<sub>3</sub>):**  $\delta$  205.8, 150.4, 146.1, 129.3, 127.4, 124.2, 124.0, 118.6, 113.9, 53.9, 50.6, 30.6.

**HRMS (ESI):** Calculated for  $\text{C}_{16}\text{H}_{17}\text{N}_2\text{O}_3$  ( $[\text{M}+\text{H}]^+$ ): 285.1234. Found: 285.1232; Calculated for  $\text{C}_{16}\text{H}_{16}\text{N}_2\text{NaO}_3$  ( $[\text{M}+\text{Na}]^+$ ): 307.1053, Found: 307.1052.

**HPLC:** Daicel Chiralpak AD-H, hexane/isopropanol = 90:10, flow rate 1.0 mL/min,  $\lambda = 254$  nm, retention time: 24.755 min (major), 19.082 min (minor).

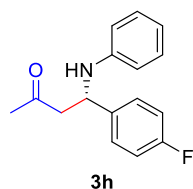

**(S)-4-(4-fluorophenyl)-4-(phenylamino)butan-2-one (3h)**

Followed the general procedure (Irradiation was conducted for 17 h, followed by the asymmetric catalytic reaction for 24 h).

55 mg, 71% yield, yellow oil.

**Enantiomeric excess (ee):** 66%.

$[\alpha]_D^{20} = +14.0^\circ$  ( $c = 0.50$ ,  $\text{CHCl}_3$ ).

$R_f = 0.50$  (Petroleum ether/EtOAc, v/v, 5:1).

**$^1\text{H NMR}$  (400 MHz,  $\text{CDCl}_3$ ):**  $\delta$  7.32 (dd,  $J = 8.6, 5.4$  Hz, 2H), 7.11 – 7.06 (m, 2H), 6.99 (t,  $J = 8.6$  Hz, 2H), 6.67 (t,  $J = 7.3$  Hz, 1H), 6.52 (d,  $J = 8.3$  Hz, 2H), 4.82 (t,  $J = 6.4$  Hz, 1H), 4.40 (br s, 1H), 2.90 (d,  $J = 6.4$  Hz, 2H), 2.09 (s, 3H).

**$^{13}\text{C NMR}$  (101 MHz,  $\text{CDCl}_3$ ):**  $\delta$  206.9, 162.0 (d,  $J = 246.5$  Hz), 146.6, 138.3 (d,  $J = 3.1$  Hz), 129.2, 127.9 (d,  $J = 8.1$  Hz), 118.1, 115.6 (d,  $J = 21.5$  Hz), 113.8, 53.7, 51.2, 30.7.

**$^{19}\text{F NMR}$  (376 MHz,  $\text{CDCl}_3$ ):**  $\delta$  -115.3.

**HRMS (ESI):** Calculated for  $\text{C}_{16}\text{H}_{17}\text{FNO}$  ( $[\text{M}+\text{H}]^+$ ): 258.1289, Found: 258.1287; Calculated for  $\text{C}_{16}\text{H}_{16}\text{FNNaO}$  ( $[\text{M}+\text{Na}]^+$ ): 280.1108, Found: 280.1107.

**HPLC:** Daicel Chiralpak AD-H, hexane/isopropanol = 97:3, flow rate 1.0 mL/min,  $\lambda = 254$  nm, retention time: 21.894 min (major), 15.443 min (minor).

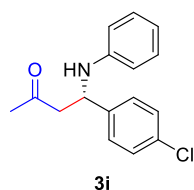

**(S)-4-(4-chlorophenyl)-4-(phenylamino)butan-2-one (3i)**<sup>[12]</sup>

Followed the general procedure (Irradiation was conducted for 17 h, followed by the asymmetric catalytic reaction for 24 h).

56 mg, 68% yield, yellow oil.

**Enantiomeric excess (ee):** 96%.

$[\alpha]_D^{20} = +13.3^\circ$  ( $c = 0.50$ ,  $\text{CHCl}_3$ ).

$R_f = 0.30$  (Petroleum ether/EtOAc, v/v, 5:1).

**$^1\text{H NMR}$  (600 MHz,  $\text{CDCl}_3$ ):**  $\delta$  7.24 – 7.18 (m, 4H), 7.04 – 6.98 (m, 2H), 6.62 – 6.58 (m, 1H), 6.43 (d,  $J = 8.4$  Hz, 2H), 4.73 (t,  $J = 6.4$  Hz, 1H), 4.36 (br s, 1H), 2.81 (d,  $J = 6.4$  Hz, 2H), 2.02 (s, 3H).

**$^{13}\text{C NMR}$  (151 MHz,  $\text{CDCl}_3$ ):**  $\delta$  206.6, 146.6, 141.2, 133.0, 129.2, 129.0, 127.8, 118.2, 113.9, 53.8, 51.0, 30.7.

**HPLC:** Daicel Chiralpak AD-H, hexane/isopropanol = 97:3, flow rate 1.0 mL/min,  $\lambda = 254$  nm, retention time: 22.484 min (major), 19.843 min (minor).

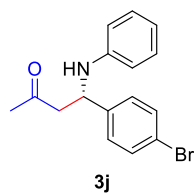

**(S)-4-(4-bromophenyl)-4-(phenylamino)butan-2-one (3j)**

Followed the general procedure (Irradiation was conducted for 17 h, followed by the asymmetric catalytic reaction for 24 h).

67 mg, 70% yield, yellow oil.

**Enantiomeric excess (ee):** 36%.

$[\alpha]_D^{20} = +9.3^\circ (c = 0.50, \text{CHCl}_3)$ .

$R_f = 0.30$  (Petroleum ether/EtOAc, v/v, 5:1).

**$^1\text{H NMR}$  (600 MHz,  $\text{CDCl}_3$ ):**  $\delta$  7.42 (d,  $J = 8.4$  Hz, 2H), 7.23 (d,  $J = 8.3$  Hz, 2H), 7.10 – 7.06 (m, 2H), 6.67 (t,  $J = 7.4$  Hz, 1H), 6.50 (d,  $J = 7.8$  Hz, 2H), 4.79 (t,  $J = 6.4$  Hz, 1H), 4.41 (br s, 1H), 2.88 (d,  $J = 6.4$  Hz, 2H), 2.09 (s, 3H).

**$^{13}\text{C NMR}$  (151 MHz,  $\text{CDCl}_3$ ):**  $\delta$  206.6, 146.6, 141.8, 131.9, 129.2, 128.2, 121.1, 118.2, 113.9, 53.9, 51.0, 30.7.

**HRMS (ESI):** Calculated for  $\text{C}_{16}\text{H}_{17}\text{BrNO}$  ( $[\text{M}+\text{H}]^+$ ): 318.0488, Found: 318.0487; Calculated for  $\text{C}_{16}\text{H}_{16}\text{BrNNaO}$  ( $[\text{M}+\text{Na}]^+$ ): 340.0307, Found: 340.0306.

**HPLC:** Daicel Chiralpak AD-H, hexane/isopropanol = 97:3, flow rate 1.0 mL/min,  $\lambda = 254$  nm, retention time: 23.849 min (major), 17.741 min (minor).

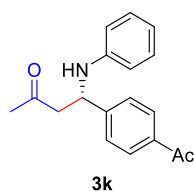

**(S)-4-(4-acetylphenyl)-4-(phenylamino)butan-2-one (3k)**

Followed the general procedure (Irradiation was conducted for 19 h, followed by the asymmetric catalytic reaction for 25 h).

38 mg, 45% yield, yellow oil.

**Enantiomeric excess (ee):** 82%.

$[\alpha]_D^{20} = +14.0^\circ (c = 0.50, \text{CHCl}_3)$ .

$R_f = 0.15$  (Petroleum ether/EtOAc, v/v, 5:1).

**<sup>1</sup>H NMR (400 MHz, CDCl<sub>3</sub>):** δ 7.90 (d, *J* = 8.1 Hz, 2H), 7.47 (d, *J* = 8.1 Hz, 2H), 7.12 – 7.04 (m, 2H), 6.67 (t, *J* = 7.3 Hz, 1H), 6.51 (d, *J* = 8.3 Hz, 2H), 4.89 (t, *J* = 6.3 Hz, 1H), 4.58 (br s, 1H), 2.94 (d, *J* = 6.3 Hz, 2H), 2.56 (s, 3H), 2.11 (s, 3H).

**<sup>13</sup>C NMR (101 MHz, CDCl<sub>3</sub>):** δ 206.5, 197.6, 148.2, 146.5, 136.4, 129.2, 128.9, 126.6, 118.2, 113.8, 54.1, 50.8, 30.7, 26.6.

**HRMS (ESI):** Calculated for C<sub>18</sub>H<sub>20</sub>NO<sub>2</sub> ([M+H]<sup>+</sup>): 282.1489, Found: 282.1487; Calculated for C<sub>18</sub>H<sub>19</sub>NNaO<sub>2</sub> ([M+Na]<sup>+</sup>): 304.1308, Found: 304.1307; Calculated for C<sub>18</sub>H<sub>19</sub>KNO<sub>2</sub> ([M+K]<sup>+</sup>): 320.1047, Found: 320.1047.

**HPLC:** Daicel Chiralpak AD-H, hexane/isopropanol = 97:3, flow rate 1.0 mL/min, λ = 254 nm, retention time: 80.081 min (major), 73.352 min (minor).

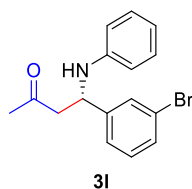

**(S)-4-(3-bromophenyl)-4-(phenylamino)butan-2-one (31)**

Followed the general procedure (Irradiation was conducted for 17 h, followed by the asymmetric catalytic reaction for 24 h).

45 mg, 47% yield, yellow oil.

**Enantiomeric excess (ee):** 54%.

$[\alpha]_D^{20} = +11.7^\circ$  (*c* = 0.50, CHCl<sub>3</sub>).

*R<sub>f</sub>* = 0.20 (Petroleum ether/EtOAc, v/v, 5:1).

**<sup>1</sup>H NMR (600 MHz, CDCl<sub>3</sub>):** δ 7.52 (s, 1H), 7.36 (d, *J* = 7.8 Hz, 1H), 7.30 (d, *J* = 7.6 Hz, 1H), 7.17 (t, *J* = 7.8 Hz, 1H), 7.10 (t, *J* = 7.8 Hz, 2H), 6.69 (t, *J* = 7.3 Hz, 1H), 6.52 (d, *J* = 8.0 Hz, 2H), 4.79 (t, *J* = 6.4 Hz, 1H), 4.48 (br s, 1H), 2.90 (d, *J* = 6.3 Hz, 2H), 2.11 (s, 3H).

**<sup>13</sup>C NMR (151 MHz, CDCl<sub>3</sub>):** δ 206.4, 146.5, 145.2, 130.5, 130.4, 129.4, 129.2, 125.0, 123.0, 118.2, 113.9, 54.0, 51.0, 30.6.

**HRMS (ESI):** Calculated for C<sub>16</sub>H<sub>17</sub>BrNO ([M+H]<sup>+</sup>): 318.0488, Found: 318.0486; Calculated for C<sub>16</sub>H<sub>16</sub>BrNNaO ([M+Na]<sup>+</sup>): 340.0307, Found: 340.0306.

**HPLC:** Daicel Chiralpak AD-H, hexane/isopropanol = 97:3, flow rate 1.0 mL/min, λ = 254 nm, retention time: 17.909 min (major), 14.631 min (minor).

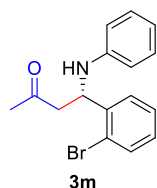

**(S)-4-(2-bromophenyl)-4-(phenylamino)butan-2-one (3m)<sup>[1]</sup>**

Followed the general procedure (Irradiation was conducted for 17 h, followed by the asymmetric catalytic reaction for 24 h).

41 mg, 43% yield, yellow oil.

**Enantiomeric excess (ee):** 84%.

$[\alpha]_D^{20} = +10.7^\circ (c = 0.50, \text{CHCl}_3)$ .

$R_f = 0.20$  (Petroleum ether/EtOAc, v/v, 5:1).

**<sup>1</sup>H NMR (600 MHz, CDCl<sub>3</sub>):**  $\delta$  7.56 (d,  $J = 7.9$  Hz, 1H), 7.43 (dd,  $J = 7.7, 1.2$  Hz, 1H), 7.24 – 7.20 (m, 1H), 7.12 – 7.05 (m, 3H), 6.68 – 6.64 (m, 1H), 6.45 (d,  $J = 7.8$  Hz, 2H), 5.13 (dd,  $J = 9.1, 3.4$  Hz, 1H), 4.64 (br s, 1H), 3.01 (dd,  $J = 15.5, 3.5$  Hz, 1H), 2.72 (dd,  $J = 15.5, 9.1$  Hz, 1H), 2.18 (s, 3H).

**<sup>13</sup>C NMR (151 MHz, CDCl<sub>3</sub>):**  $\delta$  207.2, 146.3, 140.6, 133.2, 129.2, 128.9, 128.1, 128.0, 122.6, 118.1, 113.6, 54.0, 49.2, 30.1.

**HRMS (ESI):** Calculated for C<sub>16</sub>H<sub>17</sub>BrNO ([M+H]<sup>+</sup>): 318.0488, Found: 318.0486; Calculated for C<sub>16</sub>H<sub>16</sub>BrNNaO ([M+Na]<sup>+</sup>): 340.0307, Found: 340.0306.

**HPLC:** Daicel Chiralpak AD-H, hexane/isopropanol = 99:1, flow rate 1.0 mL/min,  $\lambda = 254$  nm, retention time: 30.511 min (major), 26.070 min (minor).

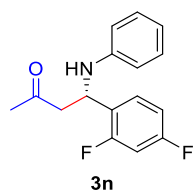

**(S)-4-(2,4-difluorophenyl)-4-(phenylamino)butan-2-one (3n)**

Followed the general procedure (Irradiation was conducted for 19 h, followed by the asymmetric catalytic reaction for 25 h).

45 mg, 54% yield, yellow solid.

**Enantiomeric excess (ee):** 84%.

$[\alpha]_D^{20} = +14.6^\circ (c = 0.50, \text{CHCl}_3)$ .



$R_f$  = 0.20 (Petroleum ether/EtOAc, v/v, 5:1).

$^1\text{H NMR}$  (400 MHz,  $\text{CDCl}_3$ ):  $\delta$  7.37 – 7.30 (m, 1H), 7.12 – 7.07 (m, 2H), 6.83 – 6.73 (m, 2H), 6.70 – 6.65 (m, 1H), 6.54 (d,  $J$  = 8.3 Hz, 2H), 5.07 (t,  $J$  = 6.2 Hz, 1H), 4.50 (br s, 1H), 3.00 – 2.88 (m, 2H), 2.12 (s, 3H).

$^{13}\text{C NMR}$  (101 MHz,  $\text{CDCl}_3$ ):  $\delta$  206.8, 162.1 (dd,  $J$  = 249.3, 12.2 Hz), 160.4 (dd,  $J$  = 248.2, 11.9 Hz), 146.3, 134.6, 129.3, 124.9 (dd,  $J$  = 13.4, 3.7 Hz), 118.3, 113.7, 111.5 (dd,  $J$  = 21.1, 3.5 Hz), 104.0 (t,  $J$  = 25.8 Hz), 49.2, 48.5, 30.4.

$^{19}\text{F NMR}$  (565 MHz,  $\text{CDCl}_3$ ):  $\delta$  -111.6 (d,  $J$  = 6.1 Hz), -115.6 (d,  $J$  = 6.1 Hz).

**HRMS (ESI)**: Calculated for  $\text{C}_{16}\text{H}_{16}\text{F}_2\text{NO}$  ( $[\text{M}+\text{H}]^+$ ): 276.1194, Found: 276.1192; Calculated for  $\text{C}_{16}\text{H}_{15}\text{F}_2\text{NNaO}$  ( $[\text{M}+\text{Na}]^+$ ): 298.1014, Found: 298.1013; Calculated for  $\text{C}_{16}\text{H}_{15}\text{F}_2\text{KNO}$  ( $[\text{M}+\text{K}]^+$ ): 314.0753, Found: 314.0753.

**HPLC**: Daicel Chiralpak AD-H, hexane/isopropanol = 97:3, flow rate 1.0 mL/min,  $\lambda$  = 254 nm, retention time: 15.396min (major), 10.056 min (minor).

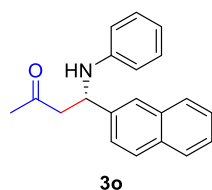

**(S)-4-(naphthalen-2-yl)-4-(phenylamino)butan-2-one (3o)<sup>[1]</sup>**

Followed the general procedure (Irradiation was conducted for 24 h, followed by the asymmetric catalytic reaction for 24 h).

56 mg, 64% yield, yellow oil.

**Enantiomeric excess (ee)**: 90%.

$[\alpha]_D^{20}$  = +7.5 ° ( $c$  = 0.50,  $\text{CHCl}_3$ ).

$R_f$  = 0.50 (Petroleum ether/EtOAc, v/v, 5:1).

$^1\text{H NMR}$  (600 MHz,  $\text{CDCl}_3$ ):  $\delta$  7.82 – 7.77 (m, 4H), 7.48 (d,  $J$  = 8.4 Hz, 1H), 7.46 – 7.42 (m, 2H), 7.07 (t,  $J$  = 7.6 Hz, 2H), 6.65 (t,  $J$  = 7.2 Hz, 1H), 6.58 (d,  $J$  = 7.8 Hz, 2H), 5.00 (t,  $J$  = 6.3 Hz, 1H), 4.54 (br s, 1H), 3.02 – 2.97 (m, 2H), 2.10 (s, 3H).

$^{13}\text{C NMR}$  (151 MHz,  $\text{CDCl}_3$ ):  $\delta$  206.8, 146.9, 140.1, 133.5, 132.9, 129.2, 128.7, 127.9, 127.7, 126.2, 125.8, 125.1, 124.4, 118.0, 113.9, 54.7, 51.2, 30.7.

**HRMS (ESI):** Calculated for C<sub>20</sub>H<sub>20</sub>NO ([M+H]<sup>+</sup>): 290.1539, Found: 290.1537; Calculated for C<sub>20</sub>H<sub>19</sub>NNaO ([M+Na]<sup>+</sup>): 312.1359, Found: 312.1358; Calculated for C<sub>20</sub>H<sub>19</sub>KNO ([M+K]<sup>+</sup>): 328.1098, Found: 328.1099.

**HPLC:** Daicel Chiralpak AD-H, hexane/isopropanol = 97:3, flow rate 1.0 mL/min, λ = 254 nm, retention time: 24.756 min (major), 21.974 min (minor).

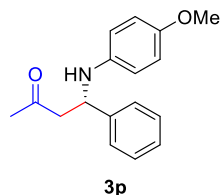

**(S)-4-((4-methoxyphenyl)amino)-4-phenylbutan-2-one (3p)<sup>[13]</sup>**

Followed the general procedure (Irradiation was conducted for 17 h, followed by the asymmetric catalytic reaction for 31 h).

37 mg, 46% yield, yellow oil.

**Enantiomeric excess (ee):** 91%.

$[\alpha]_D^{20} = +55.5^\circ$  (*c* = 0.50, CHCl<sub>3</sub>).

*R<sub>f</sub>* = 0.20 (Petroleum ether/EtOAc, v/v, 5:1).

**<sup>1</sup>H NMR (400 MHz, CDCl<sub>3</sub>):** δ 7.36 – 7.30 (m, 4H), 7.25 – 7.20 (m, 1H), 6.70 – 6.66 (m, 2H), 6.53 – 6.49 (m, 2H), 4.76 (t, *J* = 6.5 Hz, 1H), 3.68 (s, 3H), 2.89 (d, *J* = 6.5 Hz, 2H), 2.09 (s, 3H).

**<sup>13</sup>C NMR (101 MHz, CDCl<sub>3</sub>):** δ 207.2, 152.4, 142.7, 141.0, 128.8, 127.3, 126.3, 115.4, 114.8, 55.7, 55.4, 51.4, 30.7.

**HPLC:** Daicel Chiralpak AD-H, hexane/isopropanol = 97:3, flow rate 1.0 mL/min, λ = 254 nm, retention time: 66.631 min (major), 53.004 min (minor).

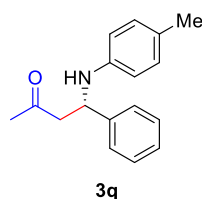

**(S)-4-phenyl-4-(p-tolylamino)butan-2-one (3q)<sup>[11]</sup>**

Followed the general procedure (Irradiation was conducted for 17 h, followed by the asymmetric catalytic reaction for 23 h).

49 mg, 64% yield, white solid.

**Enantiomeric excess (ee):** 96%.

$[\alpha]_D^{20} = -15.6^\circ (c = 0.50, \text{CHCl}_3)$ .

$R_f = 0.30$  (Petroleum ether/EtOAc, v/v, 3:1).

**$^1\text{H NMR}$  (600 MHz,  $\text{CDCl}_3$ ):**  $\delta$  7.27 (d,  $J = 7.1$  Hz, 2H), 7.25 – 7.21 (m, 2H), 7.17 – 7.14 (m, 1H), 6.82 (d,  $J = 8.0$  Hz, 2H), 6.39 (d,  $J = 8.2$  Hz, 2H), 4.73 (t,  $J = 6.4$  Hz, 1H), 4.15 (br s, 1H), 2.82 (d,  $J = 6.4$  Hz, 2H), 2.10 (s, 3H), 2.01 (s, 3H).

**$^{13}\text{C NMR}$  (101 MHz,  $\text{CDCl}_3$ ):**  $\delta$  207.1, 144.5, 142.7, 129.6, 128.8, 127.3, 127.1, 126.3, 114.0, 54.8, 51.3, 30.6, 20.3.

**HPLC:** Daicel Chiralpak AD-H, hexane/isopropanol = 97:3, flow rate 1.0 mL/min,  $\lambda = 254$  nm, retention time: 24.049 min (major), 17.663 min (minor).

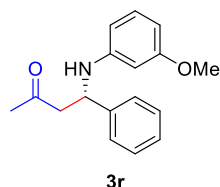

**(S)-4-((3-methoxyphenyl)amino)-4-phenylbutan-2-one (3r)**

Followed the general procedure (Irradiation was conducted for 13 h, followed by the asymmetric catalytic reaction for 34 h).

62 mg, 77% yield, yellow oil.

**Enantiomeric excess (ee):** 94%.

$[\alpha]_D^{20} = +66.2^\circ (c = 0.50, \text{CHCl}_3)$ .

$R_f = 0.20$  (Petroleum ether/EtOAc, v/v, 5:1).

**$^1\text{H NMR}$  (400 MHz,  $\text{CDCl}_3$ ):**  $\delta$  7.37 – 7.27 (m, 4H), 7.24 – 7.20 (m, 1H), 6.99 (t,  $J = 8.1$  Hz, 1H), 6.23 (dd,  $J = 8.1, 2.0$  Hz, 1H), 6.17 (dd,  $J = 8.1, 1.6$  Hz, 1H), 6.10 (s, 1H), 4.82 (t,  $J = 6.5$  Hz, 1H), 4.47 (br s, 1H), 3.67 (s, 3H), 2.91 (d,  $J = 6.5$  Hz, 2H), 2.08 (s, 3H).

**$^{13}\text{C NMR}$  (101 MHz,  $\text{CDCl}_3$ ):**  $\delta$  207.1, 160.7, 148.2, 142.5, 129.9, 128.8, 127.4, 126.2, 106.8, 103.2, 99.8, 55.0, 54.4, 51.2, 30.7.

**HRMS (ESI):** Calculated for  $\text{C}_{17}\text{H}_{20}\text{NO}_2$  ( $[\text{M}+\text{H}]^+$ ): 270.1489, Found: 270.1489.

**HPLC:** Daicel Chiralpak AS-H, hexane/isopropanol = 88:12, flow rate 1.0 mL/min,  $\lambda = 254$  nm, retention time: 11.470 min (major), 15.769 min (minor).

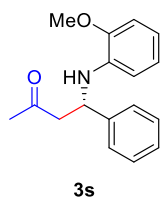

**(S)-4-((2-methoxyphenyl)amino)-4-phenylbutan-2-one (3s)<sup>[14]</sup>**

Followed the general procedure (Irradiation was conducted for 13 h, followed by the asymmetric catalytic reaction for 35 h).

50 mg, 62% yield, yellow oil.

**Enantiomeric excess (ee):** 21%.

$[\alpha]_D^{20} = +43.3^\circ (c = 0.50, \text{CHCl}_3)$ .

$R_f = 0.20$  (Petroleum ether/Acetone, v/v, 10:1).

**<sup>1</sup>H NMR (400 MHz, CDCl<sub>3</sub>):**  $\delta$  7.38 – 7.18 (m, 5H), 6.76 – 6.68 (m, 2H), 6.65 – 6.59 (m, 1H), 6.43 (d,  $J = 7.7$  Hz, 1H), 4.97 – 4.76 (m, 2H), 3.85 (d,  $J = 2.2$  Hz, 3H), 3.01 – 2.89 (m, 2H), 2.10 (d,  $J = 2.2$  Hz, 3H).

**<sup>13</sup>C NMR (101 MHz, CDCl<sub>3</sub>):**  $\delta$  206.7, 147.0, 142.7, 136.6, 128.8, 127.3, 126.3, 121.1, 117.0, 111.4, 109.5, 55.5, 54.2, 51.7, 30.6.

**HPLC:** Daicel Chiralpak AS-H, hexane/isopropanol = 90:10, flow rate 1.0 mL/min,  $\lambda = 254$  nm, retention time: 13.699 min (major), 10.262 min (minor).

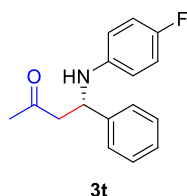

**(S)-4-((4-fluorophenyl)amino)-4-phenylbutan-2-one (3t)**

Followed the general procedure (Irradiation was conducted for 13 h, followed by the asymmetric catalytic reaction for 36 h).

45 mg, 58% yield, yellow solid.

**Enantiomeric excess (ee):** 95%.

$[\alpha]_D^{20} = +16.4^\circ (c = 0.50, \text{CHCl}_3)$ .

$R_f = 0.20$  (Petroleum ether/EtOAc, v/v, 10:1).

**<sup>1</sup>H NMR (400 MHz, CDCl<sub>3</sub>):**  $\delta$  7.35 – 7.29 (m, 4H), 7.27 – 7.20 (m, 1H), 6.82 – 6.65 (m, 2H), 6.50 – 6.44 (m, 2H), 4.75 (t,  $J = 6.5$  Hz, 1H), 4.35 (br s, 1H), 2.90 (d,  $J = 6.5$  Hz, 2H), 2.09 (s, 3H).

**<sup>13</sup>C NMR (101 MHz, CDCl<sub>3</sub>):** δ 207.1, 156.1 (d, *J* = 236.5 Hz), 143.2 (d, *J* = 1.9 Hz), 142.3, 128.8, 127.5, 126.3, 115.6 (d, *J* = 19.6 Hz), 114.8 (d, *J* = 7.5 Hz), 55.1, 51.2, 30.8.

**<sup>19</sup>F NMR (376 MHz, CDCl<sub>3</sub>):** δ -127.4.

**HRMS (ESI):** Calculated for C<sub>16</sub>H<sub>17</sub>FNO ([M+H]<sup>+</sup>): 258.1289, Found: 258.1287; Calculated for C<sub>16</sub>H<sub>16</sub>FNNaO ([M+Na]<sup>+</sup>): 280.1108, Found: 280.1108.

**HPLC:** Daicel Chiralpak IC, hexane/isopropanol = 97:3, flow rate 1.0 mL/min, λ = 254 nm, retention time: 11.805 min (major), 14.095 min (minor).

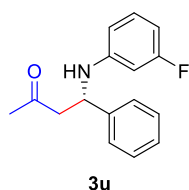

**(S)-4-((3-fluorophenyl)amino)-4-phenylbutan-2-one (3u)<sup>[15]</sup>**

Followed the general procedure (Irradiation was conducted for 18 h, followed by the asymmetric catalytic reaction for 22 h).

47 mg, 61% yield, white solid.

**Enantiomeric excess (ee):** 81%.

**[α]<sub>D</sub><sup>20</sup>** = +23.3 ° (*c* = 0.50, CHCl<sub>3</sub>).

**R<sub>f</sub>** = 0.35 (Petroleum ether/EtOAc, v/v, 5:1).

**<sup>1</sup>H NMR (400 MHz, CDCl<sub>3</sub>):** δ 7.36 – 7.29 (m, 4H), 7.26 – 7.22 (m, 1H), 7.04 – 6.96 (m, 1H), 6.36 – 6.30 (m, 2H), 6.21 (d, *J* = 11.6 Hz, 1H), 4.79 (t, *J* = 6.3 Hz, 1H), 4.66 (br s, 1H), 2.92 (d, *J* = 6.3 Hz, 2H), 2.09 (s, 3H).

**<sup>13</sup>C NMR (101 MHz, CDCl<sub>3</sub>):** δ 207.0, 163.9 (d, *J* = 243.8 Hz), 148.6 (d, *J* = 10.7 Hz), 142.0, 130.2 (d, *J* = 10.2 Hz), 128.9, 127.5, 126.2, 109.6, 104.3 (d, *J* = 21.6 Hz), 100.5 (d, *J* = 25.5 Hz), 54.4, 50.9, 30.8.

**<sup>19</sup>F NMR (376 MHz, CDCl<sub>3</sub>):** δ -112.8.

**HPLC:** Daicel Chiralpak AD-H, hexane/isopropanol = 97:3, flow rate 1.0 mL/min, λ = 254 nm, retention time: 17.645 min (major), 13.648 min (minor).

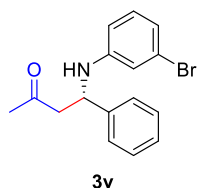

**(S)-4-((3-bromophenyl)amino)-4-phenylbutan-2-one (3v)**

Followed the general procedure (Irradiation was conducted for 13 h, followed by the asymmetric catalytic reaction for 35 h).

71 mg, 74% yield, yellow solid.

**Enantiomeric excess (ee):** 93%.

$[\alpha]_D^{20} = +29.5^\circ$  ( $c = 0.50$ ,  $\text{CHCl}_3$ ).

$R_f = 0.20$  (Petroleum ether/EtOAc, v/v, 10:1).

**$^1\text{H NMR}$  (400 MHz,  $\text{CDCl}_3$ ):**  $\delta$  7.34 – 7.28 (m, 4H), 7.27 – 7.20 (m, 1H), 6.91 (t,  $J = 8.0$  Hz, 1H), 6.78 – 6.73 (m, 1H), 6.68 (t,  $J = 2.0$  Hz, 1H), 6.46 – 6.40 (m, 1H), 4.79 (t,  $J = 6.4$  Hz, 1H), 4.60 (br s, 1H), 2.90 (d,  $J = 6.4$  Hz, 2H), 2.07 (s, 3H).

**$^{13}\text{C NMR}$  (101 MHz,  $\text{CDCl}_3$ ):**  $\delta$  207.0, 148.2, 141.9, 130.5, 128.9, 127.6, 126.2, 123.1, 120.6, 116.5, 112.3, 54.2, 50.9, 30.8.

**HRMS (ESI):** Calculated for  $\text{C}_{16}\text{H}_{17}\text{BrNO}$  ( $[\text{M}+\text{H}]^+$ ): 318.0488, Found: 318.0487; Calculated for  $\text{C}_{16}\text{H}_{16}\text{BrNNaO}$  ( $[\text{M}+\text{Na}]^+$ ): 340.0307, Found: 340.0308.

**HPLC:** Daicel Chiralpak AS-H, hexane/isopropanol = 90:10, flow rate 1.0 mL/min,  $\lambda = 254$  nm, retention time: 12.098 min (major), 16.541 min (minor).

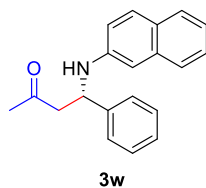

**(S)-4-(naphthalen-2-ylamino)-4-phenylbutan-2-one (3w)**

Followed the general procedure (Irradiation was conducted for 16 h, followed by the asymmetric catalytic reaction for 19 h).

73 mg, 84% yield, white solid.

**Enantiomeric excess (ee):** 90%.

$[\alpha]_D^{20} = +33.8^\circ$  ( $c = 0.50$ ,  $\text{CHCl}_3$ ).

$R_f = 0.20$  (Petroleum ether/EtOAc, v/v, 5:1).

**<sup>1</sup>H NMR (600 MHz, CDCl<sub>3</sub>):** δ 7.61 (d, *J* = 8.1 Hz, 1H), 7.58 (d, *J* = 8.8 Hz, 1H), 7.47 (d, *J* = 8.2 Hz, 1H), 7.39 (d, *J* = 7.5 Hz, 2H), 7.33 – 7.26 (m, 3H), 7.24 – 7.20 (m, 1H), 7.17 – 7.12 (m, 1H), 6.91 – 6.87 (m, 1H), 6.68 (s, 1H), 4.97 (t, *J* = 6.4 Hz, 1H), 4.62 (br s, 1H), 2.98 – 2.94 (m, 2H), 2.08 (s, 3H).

**<sup>13</sup>C NMR (151 MHz, CDCl<sub>3</sub>):** δ 207.0, 144.4, 142.2, 135.0, 128.9, 128.8, 127.8, 127.6, 127.5, 126.3, 126.2, 126.1, 122.2, 118.2, 106.4, 54.5, 51.0, 30.7.

**HRMS (ESI):** Calculated for C<sub>20</sub>H<sub>20</sub>NO ([M+H]<sup>+</sup>): 290.1539, Found: 290.1535; Calculated for C<sub>20</sub>H<sub>19</sub>NNaO ([M+Na]<sup>+</sup>): 312.1359, Found: 312.1358; Calculated for C<sub>20</sub>H<sub>19</sub>KNO ([M+K]<sup>+</sup>): 328.1098, Found: 328.1098.

**HPLC:** Daicel Chiralpak AD-H, hexane/isopropanol = 97:3, flow rate 1.0 mL/min, λ = 254 nm, retention time: 30.621 min (major), 37.347 min (minor).

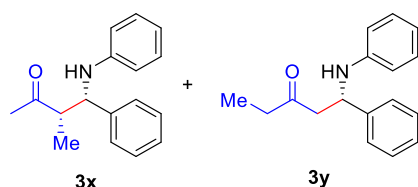

**(3*S*,4*S*)-3-methyl-4-phenyl-4-(phenylamino)butan-2-one (3x) and (S)-1-phenyl-1-(phenylamino)pentan-3-one (3y)**<sup>[11]</sup> (inseparable mixture of regioisomers, 3x:3y = 63:37)

Followed the general procedure (Irradiation was conducted for 18 h, followed by the asymmetric catalytic reaction for 40 h).

54 mg, 71% yield, white solid.

**Diastereomeric ratio (dr):** > 99:1 (3x).

**Enantiomeric excess (ee):** 99% (3x), 90% (3y).

*R<sub>f</sub>* = 0.40 (Petroleum ether/EtOAc, v/v, 5:1).

**<sup>1</sup>H NMR (600 MHz, CDCl<sub>3</sub>):** δ 7.34 (d, *J* = 7.5 Hz, 1.18H), 7.31 – 7.28 (m, 5.18H), 7.23 – 7.20 (m, 1.59H), 7.09 – 7.04 (m, 3.18H), 6.66 – 6.62 (m, 1.59H), 6.54 (d, *J* = 7.8 Hz, 1.18H), 6.49 (d, *J* = 7.8 Hz, 2H), 4.83 (t, *J* = 6.4 Hz, 0.59H), 4.74 (d, *J* = 5.4 Hz, 1H), 4.27 (br s, 1.59H), 3.01 (p, *J* = 6.8 Hz, 1H), 2.88 (d, *J* = 6.4 Hz, 1.18H), 2.38 – 2.26 (m, 1.18H), 2.07 (s, 3H), 1.08 (d, *J* = 7.0 Hz, 3H), 0.96 (t, *J* = 7.3 Hz, 1.77H).

**<sup>13</sup>C NMR (151 MHz, CDCl<sub>3</sub>):** δ 210.5, 209.8, 147.0, 146.9, 142.7, 141.1, 129.1 × 2 (129.13, 129.10), 128.8, 128.6, 127.3 × 2 (127.325, 127.316), 126.9, 126.3, 117.8 × 2 (117.82, 117.77), 113.8, 113.7, 59.0, 54.6, 53.1, 50.0, 36.9, 29.3, 11.1, 7.4.

**HRMS (ESI):** Calculated for C<sub>17</sub>H<sub>20</sub>NO ([M+H]<sup>+</sup>): 254.1539, Found: 254.1540; Calculated for C<sub>17</sub>H<sub>19</sub>NNaO ([M+Na]<sup>+</sup>): 276.1359, Found: 276.1359; Calculated for C<sub>17</sub>H<sub>19</sub>KNO ([M+K]<sup>+</sup>): 292.1098, Found: 292.1098.

**HPLC:** Daicel Chiralpak AD-H, hexane/isopropanol = 99:1, flow rate 1.0 mL/min, λ = 254 nm, retention time of **3x**: 19.735 min (major), 13.867 min (minor); retention time of **3y**: 28.980 min (major), 20.763 min (minor).

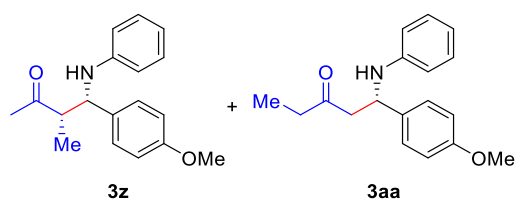

**(3*S*,4*S*)-4-(4-methoxyphenyl)-3-methyl-4-(phenylamino)butan-2-one (3z)<sup>[16]</sup> and (S)-1-(4-methoxyphenyl)-1-(phenylamino)pentan-3-one (3aa)<sup>[16]</sup> (inseparable mixture of regioisomers, 3z:3aa = 57:43)**

Followed the general procedure (Irradiation was conducted for 15 h, followed by the asymmetric catalytic reaction for 26 h).

58 mg, 68% yield, yellow oil.

**Diastereomeric ratio (dr):** > 99:1 (**3z**).

**Enantiomeric excess (ee):** 96% (**3z**), 95% (**3aa**).

**R<sub>f</sub>** = 0.25 (Petroleum ether/EtOAc, v/v, 5:1).

**<sup>1</sup>H NMR (400 MHz, CDCl<sub>3</sub>):** δ 7.30 – 7.18 (m, 3.50H), 7.11 – 7.03 (m, 3.50H), 6.84 (d, *J* = 8.0 Hz, 3.5H), 6.68 – 6.61 (m, 1.50H), 6.54 (d, *J* = 7.8 Hz, 1.50H), 6.50 (d, *J* = 7.8 Hz, 2H), 4.79 (t, *J* = 6.3 Hz, 0.75H), 4.67 (d, *J* = 5.4 Hz, 1H), 4.63 – 3.93 (m, 1.75H), 3.77 (s, 5.25H), 3.02 – 2.95 (m, 1H), 2.92 – 2.83 (m, 1.50H), 2.40 – 2.27 (m, 1.50H), 2.07 (s, 3H), 1.09 (d, *J* = 7.0 Hz, 3H), 0.97 (t, *J* = 7.2 Hz, 2.25H).

**<sup>13</sup>C NMR (101 MHz, CDCl<sub>3</sub>):** δ 210.8, 210.0, 158.8 × 2 (158.80, 158.77), 147.0, 146.8, 134.5, 132.9, 129.1 × 2 (129.12, 129.07), 127.9, 127.4, 117.8, 117.7, 114.2, 114.0, 113.9, 113.6, 58.4, 55.2 × 2 (55.24, 55.22), 54.1, 53.2, 50.0, 36.9, 29.5, 11.3, 7.4.



**HRMS (ESI):** Calculated for C<sub>18</sub>H<sub>22</sub>NO<sub>2</sub> ([M+H]<sup>+</sup>): 284.1645, Found: 284.1644; Calculated for C<sub>18</sub>H<sub>21</sub>NNaO<sub>2</sub> ([M+Na]<sup>+</sup>): 306.1464, Found: 306.1463.

**HPLC:** Daicel Chiralpak AD-H, hexane/isopropanol = 97:3, flow rate 1.0 mL/min, λ = 254 nm, retention time of **3z**: 16.518 min (major), 14.325 min (minor); retention time of **3aa**: 23.656 min (major), 19.386 min (minor).

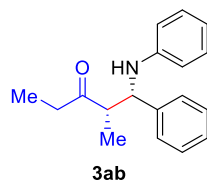

**(1S,2S)-2-methyl-1-phenyl-1-(phenylamino)pentan-3-one (3ab)**<sup>[17]</sup>

Followed the general procedure (Irradiation was conducted for 17 h, followed by the asymmetric catalytic reaction for 32 h).

11 mg, 14% yield, white solid.

**Diastereomeric ratio (dr):** 56:44.

**Enantiomeric excess (ee):** 18% (*syn*), 4% (*anti*).

$[\alpha]_D^{20} = +5.8^\circ$  (*c* = 0.50, CHCl<sub>3</sub>).

*R<sub>f</sub>* = 0.65 (Petroleum ether/EtOAc, v/v, 5:1).

**<sup>1</sup>H NMR (400 MHz, CDCl<sub>3</sub>):** δ 7.32 – 7.24 (m, 4H), 7.23 – 7.16 (m, 1H), 7.05 (t, *J* = 7.7 Hz, 2H), 6.65 – 6.57 (m, 1H), 6.54 – 6.46 (m, 2H), 4.66 (d, *J* = 5.8 Hz, 0.56H), 4.49 (d, *J* = 6.3 Hz, 0.44H), 3.07 – 2.94 (m, 1H), 2.40 – 1.93 (m, 2H), 1.15 (d, *J* = 7.0 Hz, 1.32H), 1.09 (d, *J* = 7.0 Hz, 1.68H), 0.91 (t, *J* = 7.2 Hz, 1.68H), 0.87 (t, *J* = 7.2 Hz, 1.32H).

**<sup>13</sup>C NMR (151 MHz, CDCl<sub>3</sub>):** δ 215.3, 213.3, 147.1, 147.0, 141.7, 141.3, 129.1 × 2 (129.14, 129.11), 128.7, 128.6, 127.4, 127.3, 126.9, 126.6, 117.7, 117.3, 113.7, 113.4, 60.7, 59.3, 52.3, 52.2, 36.3, 35.6, 15.6, 11.7, 7.6, 7.3.

**HPLC:** Daicel Chiralpak IC, hexane/isopropanol = 97:3, flow rate 1.0 mL/min, λ = 254 nm, retention time: 7.698 min (*syn* major enantiomer), 5.978 min (*syn* minor enantiomer), 10.406 min (*anti* major enantiomer), 9.114 min (*anti* minor enantiomer).

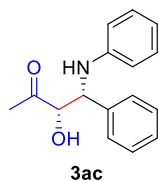

**(3*S*,4*R*)-3-hydroxy-4-phenyl-4-(phenylamino)butan-2-one (3ac)<sup>[18]</sup>**

Followed the general procedure (Irradiation was conducted for 17 h, followed by the asymmetric catalytic reaction for 24 h).

55 mg, 72% yield, yellow solid.

**Diastereomeric ratio (dr):** 96:4.

**Enantiomeric excess (ee):** 76%.

$[\alpha]_D^{20} = -13.0^\circ (c = 0.33, \text{CHCl}_3)$ .

$R_f = 0.25$  (Petroleum ether/EtOAc, v/v, 3:1).

**<sup>1</sup>H NMR (600 MHz, CDCl<sub>3</sub>):**  $\delta$  7.37 (d,  $J = 7.3$  Hz, 2H), 7.35 – 7.31 (m, 2H), 7.27 – 7.23 (m, 1H), 7.10 – 7.05 (m, 2H), 6.66 (t,  $J = 7.3$  Hz, 1H), 6.53 (d,  $J = 8.1$  Hz, 2H), 4.95 (d,  $J = 1.9$  Hz, 1H), 4.42 (d,  $J = 2.3$  Hz, 1H), 3.74 (br s, 1H), 2.29 (s, 3H).

**<sup>13</sup>C NMR (151 MHz, CDCl<sub>3</sub>):**  $\delta$  207.3, 146.2, 139.3, 129.2, 128.7, 127.6, 127.0, 118.2, 113.9, 80.8, 58.4, 25.2.

**HPLC:** Daicel Chiralpak AD-H, hexane/isopropanol = 95:5, flow rate 1.0 mL/min,  $\lambda = 254$  nm, retention time: 28.110 min (*syn* major enantiomer), 17.779 min (*syn* minor enantiomer).

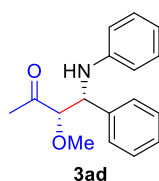

**(3*S*,4*R*)-3-methoxy-4-phenyl-4-(phenylamino)butan-2-one (3ad)**

Followed the general procedure (Irradiation was conducted for 17 h, followed by the asymmetric catalytic reaction for 26 h).

67 mg, 83% yield, yellow oil.

**Diastereomeric ratio (dr):** 91:9.

**Enantiomeric excess (ee):** 94% (*syn*), 97% (*anti*).

$[\alpha]_D^{20} = +62.6^\circ (c = 0.33, \text{CHCl}_3)$ .

$R_f = 0.30$  (Petroleum ether/EtOAc, v/v, 5:1).

Mixture of two diastereomers:

**<sup>1</sup>H NMR (400 MHz, CDCl<sub>3</sub>):** δ 7.35 (d, *J* = 7.4 Hz, 2H), 7.32 – 7.27 (m, 2H), 7.25 – 7.20 (m, 1H), 7.11 – 7.03 (m, 2H), 6.68 – 6.66 (m, 0.09H), 6.63 (t, *J* = 7.2 Hz, 0.09H), 6.58 (d, *J* = 8.3 Hz, 0.18H), 6.52 (d, *J* = 8.2 Hz, 1.82H), 4.82 (d, *J* = 2.5 Hz, 0.91H), 4.69 (d, *J* = 5.4 Hz, 0.91H), 3.92 (d, *J* = 5.2 Hz, 0.09H), 3.84 (d, *J* = 2.5 Hz, 0.91H), 3.37 (s, 0.27H), 3.28 (s, 2.73H), 2.16 (s, 2.73H), 1.82 (s, 0.27H).

**<sup>13</sup>C NMR (101 MHz, CDCl<sub>3</sub>):** δ 210.7, 210.0, 146.4, 146.2, 139.7, 138.5, 129.2 × 2 (129.20, 129.16), 128.6, 128.5, 127.8 × 2 (127.85, 127.77), 127.5, 127.0, 118.1, 117.9, 114.0, 113.8, 90.6, 89.7, 59.7, 59.4, 59.1, 58.7, 27.3, 26.6.

**HRMS (ESI):** Calculated for C<sub>17</sub>H<sub>20</sub>NO<sub>2</sub> ([M+H]<sup>+</sup>): 270.1489, Found: 270.1490; Calculated for C<sub>17</sub>H<sub>19</sub>NNaO<sub>2</sub> ([M+Na]<sup>+</sup>): 292.1308, Found: 292.1310; Calculated for C<sub>17</sub>H<sub>19</sub>KNO<sub>2</sub> ([M+K]<sup>+</sup>): 308.1047, Found: 308.1049.

**HPLC:** Daicel Chiralpak AD-H, hexane/isopropanol = 99:1, flow rate 0.7 mL/min, λ = 254 nm, retention time: 23.324 min (*syn* major enantiomer), 20.982 min (*syn* minor enantiomer), 43.307 min (*anti* major enantiomer), 27.774 min (*anti* minor enantiomer).

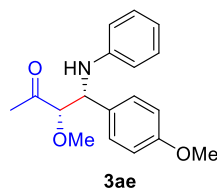

**(3*S*,4*R*)-3-methoxy-4-(4-methoxyphenyl)-4-(phenylamino)butan-2-one (3ae)**

Followed the general procedure (Irradiation was conducted for 15 h, followed by the asymmetric catalytic reaction for 26 h).

77 mg, 86% yield, yellow oil.

**Diastereomeric ratio (dr):** 83:17.

**Enantiomeric excess (ee):** 96% (*syn*), 98% (*anti*).

**[α]<sub>D</sub><sup>20</sup>** = -46.0 ° (*c* = 0.50, CHCl<sub>3</sub>).

**R<sub>f</sub>** = 0.20 (Petroleum ether/EtOAc, v/v, 5:1).

Mixture of two diastereomers:

**<sup>1</sup>H NMR (400 MHz, CDCl<sub>3</sub>):** δ 7.30 – 7.22 (m, 2H), 7.09 – 7.03 (m, 2H), 6.86 – 6.80 (m, 2H), 6.63 (t, *J* = 7.3, 1H), 6.58 (d, *J* = 7.8 Hz, 0.34H), 6.52 (d, *J* = 7.8 Hz, 1.66H), 4.83 – 4.69 (m, 1.83H),

4.64 (d,  $J = 5.2$  Hz, 0.17H), 3.90 (d,  $J = 5.2$  Hz, 0.17H), 3.80 (d,  $J = 3.1$  Hz, 0.83H), 3.75 (s, 3H), 3.37 (s, 0.51H), 3.31 (s, 2.49H), 2.14 (s, 2.49H), 1.83 (s, 0.51H).

$^{13}\text{C}$  NMR (101 MHz,  $\text{CDCl}_3$ ):  $\delta$  210.8, 210.2, 159.2, 159.0, 146.5, 146.2, 131.6, 130.4, 129.2, 129.1, 128.8, 128.1  $\times 2$  (128.11, 128.08), 117.8, 114.1, 114.0, 113.9, 113.8, 90.6, 89.8, 59.6, 59.4, 58.5, 58.2, 55.2, 27.3, 26.6.

**HRMS (ESI):** Calculated for  $\text{C}_{18}\text{H}_{22}\text{NO}_3$  ( $[\text{M}+\text{H}]^+$ ): 300.1594, Found: 300.1592; Calculated for  $\text{C}_{18}\text{H}_{21}\text{NNaO}_3$  ( $[\text{M}+\text{Na}]^+$ ): 322.1414, Found: 322.1412; Calculated for  $\text{C}_{18}\text{H}_{21}\text{KNO}_3$  ( $[\text{M}+\text{K}]^+$ ): 338.1153, Found: 338.1151.

**HPLC:** Daicel Chiralpak OJ-H, hexane/isopropanol = 80:20, flow rate 0.75 mL/min,  $\lambda = 254$  nm, retention time: 12.846 min (*syn* major enantiomer), 20.152 min (*syn* minor enantiomer), 21.892 min (*anti* major enantiomer), 16.583 min (*anti* minor enantiomer).

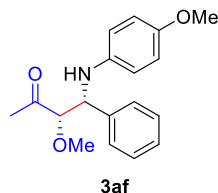

**(3*S*,4*R*)-3-methoxy-4-((4-methoxyphenyl)amino)-4-phenylbutan-2-one (3af)**

Followed the general procedure (Irradiation was conducted for 17 h, followed by the asymmetric catalytic reaction for 27 h).

71 mg, 79% yield, yellow oil.

**Diastereomeric ratio (dr):** 90:10.

**Enantiomeric excess (ee):** 98% (*syn*), 83% (*anti*).

$[\alpha]_{\text{D}}^{20} = +57.2^\circ$  ( $c = 0.50$ ,  $\text{CHCl}_3$ ).

$R_f = 0.20$  (Petroleum ether/EtOAc, v/v, 10:1).

Mixture of two diastereomers:

$^1\text{H}$  NMR (400 MHz,  $\text{CDCl}_3$ ):  $\delta$  7.35 – 7.32 (m, 2H), 7.30 – 7.25 (m, 2H), 7.23 – 7.20 (m, 1H), 6.65 – 6.62 (m, 2H), 6.49 – 6.45 (m, 2H), 4.74 (d,  $J = 3.1$  Hz, 0.90H), 4.68 – 4.47 (m, 1.1H), 3.90 (d,  $J = 5.3$  Hz, 1H), 3.80 (d,  $J = 3.2$  Hz, 0.90H), 3.64 (s, 0.30H), 3.62 (s, 2.70H), 3.33 (s, 0.30H), 3.25 (s, 2.70H), 2.14 (s, 2.70H), 1.81 (s, 0.30H).

**<sup>13</sup>C NMR (101 MHz, CDCl<sub>3</sub>):** δ 210.6, 210.1, 152.6, 152.4, 140.6, 140.3, 139.9, 138.7, 128.5, 128.4, 127.8 × 2 (127.83, 127.79), 127.4, 127.1, 115.6, 115.2, 114.8 × 2 (114.84, 114.81), 90.7, 89.8, 60.2, 59.7, 59.6, 59.3, 55.7, 55.6, 27.3, 26.5.

**HRMS (ESI):** Calculated for C<sub>18</sub>H<sub>22</sub>NO<sub>3</sub> ([M+H]<sup>+</sup>): 300.1594, Found: 300.1593; Calculated for C<sub>18</sub>H<sub>21</sub>NNaO<sub>3</sub> ([M+Na]<sup>+</sup>): 322.1414, Found: 322.1413; Calculated for C<sub>18</sub>H<sub>21</sub>KNO<sub>3</sub> ([M+K]<sup>+</sup>): 338.1153, Found: 338.1154.

**HPLC:** Daicel Chiralpak OD-H, hexane/isopropanol = 97:3, flow rate 1.0 mL/min, λ = 254 nm, retention time: 12.688 min (*syn* major enantiomer), 11.280 min (*syn* minor enantiomer), 14.065 min (*anti* major enantiomer), 16.083 min (*anti* minor enantiomer).

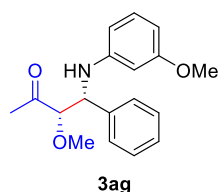

**(3*S*,4*R*)-3-methoxy-4-((3-methoxyphenyl)amino)-4-phenylbutan-2-one (3ag)**

Followed the general procedure (Irradiation was conducted for 17 h, followed by the asymmetric catalytic reaction for 27 h).

72 mg, 80% yield, yellow oil.

**Diastereomeric ratio (dr):** 87:13.

**Enantiomeric excess (ee):** 97% (*syn*), 91% (*anti*).

$[\alpha]_D^{20} = +34.8^\circ$  ( $c = 0.50$ , CHCl<sub>3</sub>).

$R_f = 0.30$  (Petroleum ether/EtOAc, v/v, 10:1).

Mixture of two diastereomers:

**<sup>1</sup>H NMR (400 MHz, CDCl<sub>3</sub>):** δ 7.36 – 7.33 (m, 2H), 7.31 – 7.25 (m, 3H), 7.23 – 7.20 (m, 1H), 6.97 – 6.92 (m, 1H), 6.21 – 6.18 (m, 1H), 6.16 – 6.12 (m, 1H), 6.07 (t,  $J = 2.2$  Hz, 1H), 4.86 – 4.77 (m, 1.87H), 4.67 (d,  $J = 5.2$  Hz, 0.13H), 3.91 (d,  $J = 4.8$  Hz, 0.13H), 3.82 (d,  $J = 1.4$  Hz, 0.87H), 3.65 (s, 0.39H), 3.63 (s, 2.61H), 3.33 (s, 0.39H), 3.26 (s, 2.61H), 2.13 (s, 2.61H), 1.80 (s, 0.39H).

**<sup>13</sup>C NMR (101 MHz, CDCl<sub>3</sub>):** δ 210.5, 209.8, 160.7 × 2 (160.75, 160.73), 147.9, 147.7, 139.8, 138.5, 130.0, 129.9, 128.6, 128.5, 127.9, 127.8, 127.5, 127.0, 107.0, 106.8, 103.4, 103.2, 100.1, 99.9, 90.4, 89.7, 59.7, 59.4, 59.1, 58.7, 55.0 × 2 (54.99, 54.97), 27.3, 26.6.

**HRMS (ESI):** Calculated for C<sub>18</sub>H<sub>22</sub>NO<sub>3</sub> ([M+H]<sup>+</sup>): 300.1594, Found: 300.1593; Calculated for C<sub>18</sub>H<sub>21</sub>NNaO<sub>3</sub> ([M+Na]<sup>+</sup>): 322.1414, Found: 322.1412.

**HPLC:** Daicel Chiralpak AS-H, hexane/isopropanol = 97:3, flow rate 1.0 mL/min, λ = 254 nm, retention time: 22.080 min (*syn* major enantiomer), 13.843 min (*syn* minor enantiomer), 21.425 min (*anti* major enantiomer), 16.762 min (*anti* minor enantiomer).

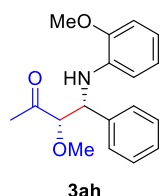

**(3*S*,4*R*)-3-methoxy-4-((2-methoxyphenyl)amino)-4-phenylbutan-2-one (3ah)**

Followed the general procedure (Irradiation was conducted for 17 h, followed by the asymmetric catalytic reaction for 27 h).

48 mg, 53% yield, yellow oil.

**Diastereomeric ratio (dr):** 79:21.

**Enantiomeric excess (ee):** 70% (*syn*), 51% (*anti*).

$[\alpha]_D^{20} = +61.3^\circ$  ( $c = 0.50$ , CHCl<sub>3</sub>).

$R_f = 0.20$  (Petroleum ether/EtOAc, v/v, 10:1).

Mixture of two diastereomers:

**<sup>1</sup>H NMR (400 MHz, CDCl<sub>3</sub>):** δ 7.35 – 7.31 (m, 2H), 7.30 – 7.25 (m, 2H), 7.23 – 7.17 (m, 1H), 6.75 – 6.71 (m, 1H), 6.69 – 6.56 (m, 2H), 6.47 (dd,  $J = 7.7, 1.5$  Hz, 0.21H), 6.32 (dd,  $J = 7.7, 1.6$  Hz, 0.79H), 5.26 (br s, 1H), 4.82 (d,  $J = 2.9$  Hz, 0.79H), 4.70 (d,  $J = 5.4$  Hz, 0.21H), 3.92 (d,  $J = 5.4$  Hz, 0.21H), 3.86 (s, 2.37H), 3.84 (s, 0.63H), 3.82 (d,  $J = 8.7$  Hz, 0.79H), 3.35 (s, 0.21H), 3.26 (s, 2.37H), 2.17 (s, 2.37H), 1.84 (s, 0.63H).

**<sup>13</sup>C NMR (101 MHz, CDCl<sub>3</sub>):** δ 210.7, 210.4, 147.3, 147.2, 139.9, 138.7, 136.4, 136.1, 128.5, 128.4, 127.8, 127.7, 127.4, 127.0, 121.2, 118.5, 117.4, 117.0, 111.6, 111.4, 109.8, 109.7, 90.9, 90.0, 59.8, 59.5, 59.0, 58.8, 55.6 × 2 (55.61, 55.60), 27.4, 26.4.

**HRMS (ESI):** Calculated for C<sub>18</sub>H<sub>22</sub>NO<sub>3</sub> ([M+H]<sup>+</sup>): 300.1594, Found: 300.1594; Calculated for C<sub>18</sub>H<sub>21</sub>NNaO<sub>3</sub> ([M+Na]<sup>+</sup>): 322.1414, Found: 322.1412; Calculated for C<sub>18</sub>H<sub>21</sub>KNO<sub>3</sub> ([M+K]<sup>+</sup>): 338.1153, Found: 338.1153.

**HPLC:** Daicel Chiralpak OD-H, hexane/isopropanol = 97:3, flow rate 1.0 mL/min, λ = 254 nm,

retention time: 11.633 min (*syn* major enantiomer), 12.532 min (*syn* minor enantiomer), 10.623 min (*anti* major enantiomer), 11.217 min (*anti* minor enantiomer).

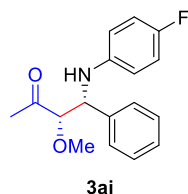

**(3*S*,4*R*)-4-((4-fluorophenyl)amino)-3-methoxy-4-phenylbutan-2-one (3ai)**

Followed the general procedure (Irradiation was conducted for 17 h, followed by the asymmetric catalytic reaction for 27 h).

64 mg, 74% yield, yellow oil.

**Diastereomeric ratio (dr):** 90:10.

**Enantiomeric excess (ee):** 99% (*syn*), 83% (*anti*).

$[\alpha]_D^{20} = +43.5^\circ$  ( $c = 0.50$ ,  $\text{CHCl}_3$ ).

$R_f = 0.40$  (Petroleum ether/EtOAc, v/v, 5:1).

Mixture of two diastereomers:

**$^1\text{H NMR}$  (400 MHz,  $\text{CDCl}_3$ ):**  $\delta$  7.34 – 7.26 (m, 4H), 7.23 – 7.19 (m, 1H), 6.77 – 6.71 (m, 2H), 6.52 – 6.48 (m, 0.20H), 6.46 – 6.42 (m, 1.80H), 4.82 – 4.64 (m, 1.90H), 4.61 (d,  $J = 5.3$  Hz, 0.20H), 3.91 (d,  $J = 5.3$  Hz, 0.10H), 3.81 (d,  $J = 3.1$  Hz, 0.90H), 3.34 (s, 0.30H), 3.25 (s, 2.70H), 2.14 (s, 2.70H), 1.80 (s, 0.30H).

**$^{13}\text{C NMR}$  (101 MHz,  $\text{CDCl}_3$ ):**  $\delta$  210.7, 209.9, 156.1 (d,  $J = 236.7$  Hz), 156.0 (d,  $J = 236.4$  Hz), 142.8 (d,  $J = 1.8$  Hz), 142.6 (d,  $J = 1.9$  Hz), 139.5, 138.3, 128.8, 128.6, 127.9, 127.8, 127.6, 127.1, 115.6  $\times$  2 [115.63 (d,  $J = 22.4$  Hz), 115.57 (d,  $J = 22.4$  Hz)], 115.1 (d,  $J = 7.5$  Hz), 114.7 (d,  $J = 7.5$  Hz), 90.5, 89.6, 59.8, 59.7, 59.4, 59.3, 27.3, 26.6.

**$^{19}\text{F NMR}$  (376 MHz,  $\text{CDCl}_3$ ):**  $\delta$  -127.0, -127.4.

**HRMS (ESI):** Calculated for  $\text{C}_{17}\text{H}_{19}\text{FNO}_2$  ( $[\text{M}+\text{H}]^+$ ): 288.1394, Found: 288.1393; Calculated for  $\text{C}_{17}\text{H}_{18}\text{FNNaO}_2$  ( $[\text{M}+\text{Na}]^+$ ): 310.1214, Found: 310.1213.

**HPLC:** Daicel Chiralpak AD-H, hexane/isopropanol = 97:3, flow rate 1.0 mL/min,  $\lambda = 254$  nm, retention time: 89.488 min (*syn* major enantiomer), 9.511 min (*syn* minor enantiomer), 16.912 min (*anti* major enantiomer), 11.515 min (*anti* minor enantiomer).

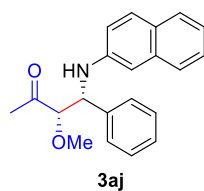

**(3*S*,4*R*)-3-methoxy-4-(naphthalen-2-ylamino)-4-phenylbutan-2-one (3aj)**

Followed the general procedure (Irradiation was conducted for 16 h, followed by the asymmetric catalytic reaction for 19 h).

79 mg, 82% yield, white solid.

**Diastereomeric ratio (dr):** 85:15.

**Enantiomeric excess (ee):** 92% (*syn*), 74% (*anti*).

$[\alpha]_D^{20} = +63.6^\circ (c = 0.33, \text{CHCl}_3)$ .

$R_f = 0.35$  (Petroleum ether/EtOAc, v/v, 5:1).

Mixture of two diastereomers:

**$^1\text{H NMR}$  (400 MHz,  $\text{CDCl}_3$ ):**  $\delta$  7.61 – 7.54 (m, 2H), 7.44 (d,  $J = 8.2$  Hz, 1H), 7.39 (dd,  $J = 6.9, 1.5$  Hz, 2H), 7.32 – 7.25 (m, 3H), 7.24 – 7.20 (m, 1H), 7.16 – 7.10 (m, 1H), 6.93 – 6.88 (m, 1H), 6.73 (d,  $J = 2.2$  Hz, 0.15H), 6.64 – 6.61 (m, 0.85H), 5.06 – 4.85 (m, 1.85H), 4.84 – 4.82 (m, 0.15H), 4.01 – 3.98 (m, 0.15H), 3.88 (s, 0.85H), 3.36 (s, 0.45H), 3.29 (s, 2.55H), 2.16 (s, 2.55H), 1.82 (s, 0.45H).

**$^{13}\text{C NMR}$  (101 MHz,  $\text{CDCl}_3$ ):**  $\delta$  210.7, 209.91, 144.2, 143.9, 139.50, 138.3, 135.0  $\times$  2 (135.00, 134.95), 129.4, 129.2, 129.1, 129.0, 128.6  $\times$  2 (128.63, 128.59), 128.0  $\times$  2 (128.01, 127.97), 127.8, 127.7, 127.6, 127.0, 126.3, 126.2, 126.0, 125.8, 122.4, 122.2, 118.3, 118.0, 108.6, 106.5, 90.5, 89.5, 59.7, 59.4, 59.1, 58.7, 27.3, 26.7.

**HRMS (ESI):** Calculated for  $\text{C}_{21}\text{H}_{22}\text{NO}_2$  ( $[\text{M}+\text{H}]^+$ ): 320.1645, Found: 320.1645; Calculated for  $\text{C}_{21}\text{H}_{21}\text{NNaO}_2$  ( $[\text{M}+\text{Na}]^+$ ): 342.1464, Found: 342.1465; Calculated for  $\text{C}_{21}\text{H}_{21}\text{KNO}_2$  ( $[\text{M}+\text{K}]^+$ ): 358.1204, Found: 358.1207.

**HPLC:** Daicel Chiralpak AD-H, hexane/isopropanol = 97:3, flow rate 1.0 mL/min,  $\lambda = 254$  nm, retention time: 15.559 min (*syn* major enantiomer), 14.849 min (*syn* minor enantiomer), 24.594 min (*anti* major enantiomer), 17.174 min (*anti* minor enantiomer).



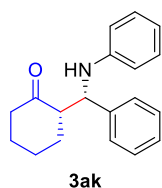

**(S)-2-((S)-phenyl(phenylamino)methyl)cyclohexan-1-one (3ak)<sup>[19]</sup>**

Followed the general procedure (Irradiation was conducted for 16 h, followed by the asymmetric catalytic reaction for 25 h).

62 mg, 74% yield, white solid.

**Diastereomeric ratio (dr):** 62:38.

**Enantiomeric excess (ee):** 87% (*syn*), 58% (*anti*).

$[\alpha]_D^{20} = -33.0^\circ$  ( $c = 0.33$ ,  $\text{CHCl}_3$ ). {*Ref. 18*,  $[\alpha]_D^{25} = -44.2^\circ$  ( $c = 0.98$ ,  $\text{CHCl}_3$ , > 99% ee)}.

$R_f = 0.35$  (Petroleum ether/EtOAc, v/v, 5:1).

Mixture of two diastereomers:

**<sup>1</sup>H NMR (600 MHz, CDCl<sub>3</sub>):**  $\delta$  7.38 – 7.32 (m, 2H), 7.31 – 7.26 (m, 2H), 7.22 – 7.18 (m, 1H), 7.10 – 7.02 (m, 2H), 6.66 – 6.60 (m, 1H), 6.57 – 6.51 (m, 2H), 4.80 (d,  $J = 4.3$  Hz, 0.62H), 4.76 – 4.28 (m, 1.38H), 2.82 – 2.77 (m, 0.62H), 2.77 – 2.73 (m, 0.38H), 2.45 – 2.38 (m, 1H), 2.35 – 2.26 (m, 1H), 2.08 – 1.99 (m, 1H), 1.93 – 1.81 (m, 2H), 1.72 – 1.63 (m, 2H), 1.62 – 1.58 (m, 1H).

**<sup>13</sup>C NMR (151 MHz, CDCl<sub>3</sub>):**  $\delta$  212.6, 211.2, 147.5, 147.2, 141.7, 141.6, 129.0  $\times$  2 (129.04, 129.00), 128.5, 128.4, 127.5, 127.3, 127.2, 127.0, 117.7, 117.6, 114.1, 113.8, 58.2, 57.4  $\times$  2 (57.45, 57.41), 56.6, 42.4, 41.8, 31.2, 28.8, 27.8, 26.9, 24.8, 23.7.

**HRMS (ESI):** Calculated for C<sub>19</sub>H<sub>22</sub>NO ( $[\text{M}+\text{H}]^+$ ): 280.1696, Found: 280.1696; Calculated for C<sub>19</sub>H<sub>21</sub>NNaO ( $[\text{M}+\text{Na}]^+$ ): 302.1515, Found: 302.1515; Calculated for C<sub>19</sub>H<sub>21</sub>KNO ( $[\text{M}+\text{K}]^+$ ): 318.1255, Found: 318.1255.

**HPLC:** Daicel Chiralpak OJ-H, hexane/isopropanol = 80:20, flow rate 0.75 mL/min,  $\lambda = 254$  nm, retention time: 25.390 min (*syn* major enantiomer), 19.037 min (*syn* minor enantiomer), 16.664 min (*anti* major enantiomer), 12.149 min (*anti* minor enantiomer).

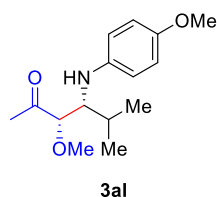

**(3S,4R)-3-methoxy-4-((4-methoxyphenyl)amino)-5-methylhexan-2-one (3al)**

Followed the general procedure (Irradiation was conducted for 16 h, followed by the asymmetric catalytic reaction for 28 h).

57 mg, 72% yield, yellow oil.

**Diastereomeric ratio (dr):** > 99:1.

**Enantiomeric excess (ee):** 83%.

$[\alpha]_D^{20} = +14.7^\circ (c = 0.50, \text{CHCl}_3)$ .

$R_f = 0.30$  (Petroleum ether/EtOAc, v/v, 3:1).

**$^1\text{H NMR}$  (400 MHz,  $\text{CDCl}_3$ ):**  $\delta$  6.80 – 6.73 (m, 2H), 6.66 – 6.54 (m, 2H), 3.96 (s, 3H), 3.75 – 3.67 (m, 4H), 3.37 (s, 3H), 2.62 – 2.54 (m, 2H), 1.97 – 1.87 (m, 1H), 0.96 (d,  $J = 6.8$  Hz, 3H), 0.91 (d,  $J = 6.8$  Hz, 3H).

**$^{13}\text{C NMR}$  (101 MHz,  $\text{CDCl}_3$ ):**  $\delta$  203.8, 147.4, 136.9, 110.3, 110.2, 73.3, 54.5, 51.6, 51.0, 35.9, 26.9, 14.0, 13.6.

**HRMS (ESI):** Calculated for  $\text{C}_{15}\text{H}_{24}\text{NO}_3$  ( $[\text{M}+\text{H}]^+$ ): 266.1751, Found: 266.1751; Calculated for  $\text{C}_{15}\text{H}_{23}\text{NNaO}_3$  ( $[\text{M}+\text{Na}]^+$ ): 288.1570, Found: 288.1572.

**HPLC:** Daicel Chiralpak AS-H, hexane/isopropanol = 97:3, flow rate 1.0 mL/min,  $\lambda = 254$  nm, retention time: 23.463 min (*syn* major enantiomer), 31.452 min (*syn* minor enantiomer).

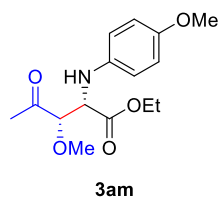

**Ethyl (2*S*,3*S*)-3-methoxy-2-((4-methoxyphenyl)amino)-4-oxopentanoate (3am)<sup>[20]</sup>**

Followed the general procedure (Irradiation was conducted for 16 h, followed by the asymmetric catalytic reaction for 28 h).

67 mg, 76% yield, yellow oil.

**Diastereomeric ratio (dr):** 96:4.

**Enantiomeric excess (ee):** 98%.

$[\alpha]_D^{20} = +65.5^\circ (c = 0.50, \text{CHCl}_3)$ .

$R_f = 0.30$  (Petroleum ether/EtOAc, v/v, 3:1).

**<sup>1</sup>H NMR (400 MHz, CDCl<sub>3</sub>):** δ 6.74 (d, *J* = 8.9 Hz, 2H), 6.60 (d, *J* = 8.9 Hz, 2H), 4.40 (s, 1H), 4.28 – 4.12 (m, 3H), 4.10 (d, *J* = 2.6 Hz, 1H), 3.72 (s, 3H), 3.47 (s, 3H), 2.25 (s, 3H), 1.25 (t, *J* = 7.1 Hz, 3H).

**<sup>13</sup>C NMR (101 MHz, CDCl<sub>3</sub>):** δ 204.6, 166.5, 148.6, 136.1, 111.4, 110.0, 82.7, 56.7, 55.9, 55.1, 50.9, 22.4, 9.4.

**HPLC:** Daicel Chiralpak AD-H, hexane/isopropanol = 97:3, flow rate 1.0 mL/min, λ = 214 nm, retention time: 27.804 min (*syn* major enantiomer), 30.092 min (*syn* minor enantiomer).

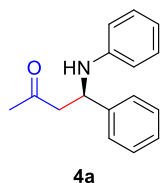

**(*R*)-4-phenyl-4-(phenylamino)butan-2-one (4a)<sup>[1]</sup>**

Followed the general procedure (Irradiation was conducted for 16 h, followed by the asymmetric catalytic reaction for 24 h).

46 mg, 64% yield, white solid.

**Enantiomeric excess (ee):** 95%.

$[\alpha]_D^{20} = -18.9^\circ$  (*c* = 0.20, CHCl<sub>3</sub>).

*R<sub>f</sub>* = 0.40 (Petroleum ether/EtOAc, v/v, 5:1).

**<sup>1</sup>H NMR (600 MHz, CDCl<sub>3</sub>):** δ 7.35 (d, *J* = 7.3 Hz, 2H), 7.30 (t, *J* = 7.5 Hz, 2H), 7.22 (t, *J* = 7.1 Hz, 1H), 7.10 – 7.06 (m, 2H), 6.66 (t, *J* = 7.3 Hz, 1H), 6.54 (d, *J* = 7.8 Hz, 2H), 4.84 (t, *J* = 6.4 Hz, 1H), 4.41 (br s, 1H), 2.91 (d, *J* = 6.4 Hz, 2H), 2.08 (s, 3H).

**<sup>13</sup>C NMR (151 MHz, CDCl<sub>3</sub>):** δ 207.0, 146.9, 142.6, 129.2, 128.8, 127.4, 126.3, 117.9, 113.8, 54.5, 51.2, 30.7.

**HPLC:** Daicel Chiralpak AD-H, hexane/isopropanol = 97:3, flow rate 1.0 mL/min, λ = 254 nm, retention time: 12.943 min (major), 16.832 min (minor).

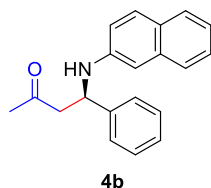

**(*R*)-4-(naphthalen-2-ylamino)-4-phenylbutan-2-one (4b)**

Followed the general procedure (Irradiation was conducted for 16 h, followed by the asymmetric catalytic reaction for 19 h).

69 mg, 79% yield, white solid.

**Enantiomeric excess (ee):** 90%.

$[\alpha]_D^{20} = -30.1$  ( $c = 0.50$ ,  $\text{CHCl}_3$ ).

$R_f = 0.20$  (Petroleum ether/EtOAc, v/v, 5:1).

**$^1\text{H NMR}$  (600 MHz,  $\text{CDCl}_3$ ):**  $\delta$  7.55 (d,  $J = 8.1$  Hz, 1H), 7.52 (d,  $J = 8.8$  Hz, 1H), 7.41 (d,  $J = 8.2$  Hz, 1H), 7.33 (d,  $J = 7.5$  Hz, 2H), 7.25 (t,  $J = 7.6$  Hz, 2H), 7.23 – 7.20 (m, 1H), 7.16 (t,  $J = 7.4$  Hz, 1H), 7.10 – 7.07 (m, 1H), 6.83 (dd,  $J = 8.8, 2.1$  Hz, 1H), 6.61 (s, 1H), 4.91 (t,  $J = 6.4$  Hz, 1H), 4.62 (br s, 1H), 2.92 (d,  $J = 6.9$  Hz, 2H), 2.04 (s, 3H).

**$^{13}\text{C NMR}$  (151 MHz,  $\text{CDCl}_3$ ):**  $\delta$  206.0, 143.4, 141.2, 133.9, 127.9, 127.8, 126.7, 126.5, 126.4, 125.3, 125.2, 125.1, 121.2, 117.2, 105.3, 53.4, 50.0, 29.7.

**HRMS (ESI):** Calculated for  $\text{C}_{20}\text{H}_{20}\text{NO}$  ( $[\text{M}+\text{H}]^+$ ): 290.1539, Found: 290.1536; Calculated for  $\text{C}_{20}\text{H}_{19}\text{NNaO}$  ( $[\text{M}+\text{Na}]^+$ ): 312.1359, Found: 312.1357; Calculated for  $\text{C}_{20}\text{H}_{19}\text{KNO}$  ( $[\text{M}+\text{K}]^+$ ): 328.1098, Found: 328.1097.

**HPLC:** Daicel Chiralpak AD-H, hexane/isopropanol = 97:3, flow rate 1.0 mL/min,  $\lambda = 254$  nm, retention time: 37.366 min (major), 30.320 min (minor).

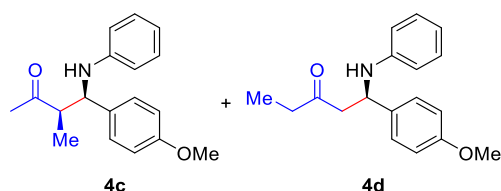

**(3*R*,4*R*)-4-(4-methoxyphenyl)-3-methyl-4-(phenylamino)butan-2-one (4c)<sup>[6]</sup> and (*S*)-1-(4-methoxyphenyl)-1-(phenylamino)pentan-3-one (4d)<sup>[6]</sup> (inseparable mixture of regioisomers, 4c:4d = 52:48)**

Followed the general procedure (Irradiation was conducted for 15 h, followed by the asymmetric catalytic reaction for 26 h).

55 mg, 65% yield, yellow oil.

**Diastereomeric ratio (dr):** > 99:1 (4c).

**Enantiomeric excess (ee):** 89% (4c), 94% (4d).

$R_f = 0.25$  (Petroleum ether/EtOAc, v/v, 5:1).

**<sup>1</sup>H NMR (600 MHz, CDCl<sub>3</sub>):** δ 7.27 – 7.24 (m, 2H), 7.21 (d, *J* = 8.4 Hz, 1.84H), 7.10 – 7.04 (m, 3.84H), 6.84 (d, *J* = 7.9 Hz, 3.84H), 6.67 – 6.62 (m, 1.84H), 6.54 (d, *J* = 7.9 Hz, 1.84H), 6.49 (d, *J* = 7.9 Hz, 2H), 4.79 (t, *J* = 6.4 Hz, 0.92H), 4.67 (d, *J* = 5.6 Hz, 1H), 4.59 – 4.12 (m, 1.92H), 3.76 (s, 5.76H), 3.00 – 2.96 (m, 1H), 2.90 – 2.86 (m, 1.84H), 2.36 – 2.29 (m, 1.84H), 2.06 (s, 3H), 1.09 (d, *J* = 7.0 Hz, 3H), 0.96 (t, *J* = 7.3 Hz, 2.76H).

**<sup>13</sup>C NMR (151 MHz, CDCl<sub>3</sub>):** δ 210.6, 209.9, 158.8 × 2 (158.86, 158.83), 147.0, 146.9, 134.6, 133.0, 129.1 × 2 (129.10, 129.06), 127.9, 127.4, 117.8, 117.7, 114.2, 114.1, 113.9, 113.7, 58.5, 55.2 × 2 (55.23, 55.21), 54.1, 53.2, 49.9, 36.9, 29.4, 11.4, 7.4.

**HRMS (ESI):** Calculated for C<sub>18</sub>H<sub>22</sub>NO<sub>2</sub> ([M+H]<sup>+</sup>): 284.1645, Found: 284.1644; Calculated for C<sub>18</sub>H<sub>21</sub>NNaO<sub>2</sub> ([M+Na]<sup>+</sup>): 306.1464, Found: 306.1463; Calculated for C<sub>18</sub>H<sub>21</sub>KNO<sub>2</sub> ([M+K]<sup>+</sup>): 322.1204, Found: 322.1205.

**HPLC:** Daicel Chiralpak AD-H, hexane/isopropanol = 97:3, flow rate 1.0 mL/min, λ = 254 nm, retention time of **4c**: 14.038 min (major), 16.241 min (minor); retention time of **4d**: 19.007 min (major), 23.184 min (minor).

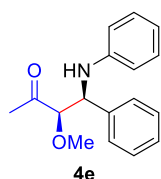

**(3*R*,4*S*)-3-methoxy-4-phenyl-4-(phenylamino)butan-2-one (4e)**

Followed the general procedure (Irradiation was conducted for 16 h, followed by the asymmetric catalytic reaction for 24 h).

66 mg, 82% yield, yellow oil.

**Diastereomeric ratio (dr):** 86:14.

**Enantiomeric excess (ee):** 98% (*syn*), 91% (*anti*).

$[\alpha]_D^{20} = -62.4^\circ$  (*c* = 0.33, CHCl<sub>3</sub>).

*R<sub>f</sub>* = 0.30 (Petroleum ether/EtOAc, v/v, 5:1).

Mixture of two diastereomers:

**<sup>1</sup>H NMR (400 MHz, CDCl<sub>3</sub>):** δ 7.35 (d, *J* = 7.2 Hz, 2H), 7.30 (t, *J* = 7.6 Hz, 2H), 7.24 – 7.20 (m, 1H), 7.08 – 7.03 (m, 2H), 6.66 – 6.61 (m, 1H), 6.60 – 6.56 (m, 0.28H), 6.54 – 6.50 (m, 1.72H), 4.85

– 4.74 (m, 1.86H), 4.69 (d,  $J = 5.4$  Hz, 0.14H), 3.92 (d,  $J = 5.3$  Hz, 0.14H), 3.83 (d,  $J = 2.8$  Hz, 0.86H), 3.36 (s, 0.42H), 3.28 (s, 2.58H), 2.15 (s, 2.58H), 1.82 (s, 0.42H).

$^{13}\text{C}$  NMR (101 MHz,  $\text{CDCl}_3$ ):  $\delta$  210.6, 210.0, 146.4, 146.2, 139.7, 138.5, 129.2  $\times$  2 (129.21, 129.16), 128.6, 128.5, 127.8  $\times$  2 (127.86, 127.78), 127.5, 127.0, 118.2, 117.9, 114.1, 113.8, 90.6, 89.7, 59.7, 59.4, 59.1, 58.7, 27.3, 26.6.

**HRMS (ESI):** Calculated for  $\text{C}_{17}\text{H}_{20}\text{NO}_2$  ( $[\text{M}+\text{H}]^+$ ): 270.1489, Found: 270.1488; Calculated for  $\text{C}_{17}\text{H}_{19}\text{NNaO}_2$  ( $[\text{M}+\text{Na}]^+$ ): 292.1308, Found: 292.1307; Calculated for  $\text{C}_{17}\text{H}_{19}\text{KNO}_2$  ( $[\text{M}+\text{K}]^+$ ): 308.1047, Found: 308.1048.

**HPLC:** Daicel Chiralpak AD-H, hexane/isopropanol = 99:1, flow rate 0.7 mL/min,  $\lambda = 254$  nm, retention time: 21.007 min (*syn* major enantiomer), 22.543 min (*syn* minor enantiomer), 26.512 min (*anti* major enantiomer), 42.136 min (*anti* minor enantiomer).

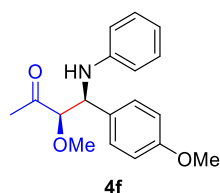

**(3R,4S)-3-methoxy-4-(4-methoxyphenyl)-4-(phenylamino)butan-2-one (4f)**

Followed the general procedure (Irradiation was conducted for 15 h, followed by the asymmetric catalytic reaction for 26 h).

74 mg, 82% yield, yellow oil.

**Diastereomeric ratio (dr):** 85:15.

**Enantiomeric excess (ee):** 96% (*syn*), 86% (*anti*).

$[\alpha]_{\text{D}}^{20} = +49.7^\circ$  ( $c = 0.50$ ,  $\text{CHCl}_3$ ).

$R_f = 0.20$  (Petroleum ether/EtOAc, v/v, 5:1).

Mixture of two diastereomers:

$^1\text{H}$  NMR (600 MHz,  $\text{CDCl}_3$ ):  $\delta$  7.27 – 7.22 (m, 2H), 7.10 – 7.03 (m, 2H), 6.85 – 6.80 (m, 2H), 6.67 – 6.61 (m, 1H), 6.58 (d,  $J = 7.7$  Hz, 0.30H), 6.51 (d,  $J = 7.8$  Hz, 1.70H), 4.84 – 4.55 (m, 2H), 3.90 (d,  $J = 5.2$  Hz, 0.15H), 3.79 (d,  $J = 2.9$  Hz, 0.85H), 3.75 (s, 3H), 3.36 (s, 0.45H), 3.30 (s, 2.55H), 2.13 (s, 2.55H), 1.83 (s, 0.45H).

**<sup>13</sup>C NMR (151 MHz, CDCl<sub>3</sub>):** δ 210.6, 210.0, 159.2, 159.0, 146.6, 146.3, 131.6, 130.5, 129.2, 129.1, 128.9, 128.1 × 2 (128.12, 128.08), 118.1, 117.8, 114.1, 114.0, 113.9, 90.6, 89.8, 59.6, 59.4, 58.6, 58.2, 55.2 × 2 (55.19, 55.18), 27.3, 26.6.

**HRMS (ESI):** Calculated for C<sub>18</sub>H<sub>22</sub>NO<sub>3</sub> ([M+H]<sup>+</sup>): 300.1594, Found: 300.1592; Calculated for C<sub>18</sub>H<sub>21</sub>NNaO<sub>3</sub> ([M+Na]<sup>+</sup>): 322.1414, Found: 322.1412; Calculated for C<sub>18</sub>H<sub>21</sub>KNO<sub>3</sub> ([M+K]<sup>+</sup>): 338.1153, Found: 338.1152.

**HPLC:** Daicel Chiralpak OJ-H, hexane/isopropanol = 80:20, flow rate 0.75 mL/min, λ = 254 nm, retention time: 19.951 min (*syn* major enantiomer), 13.448 min (*syn* minor enantiomer), 16.756 min (*anti* major enantiomer), 22.922 min (*anti* minor enantiomer).

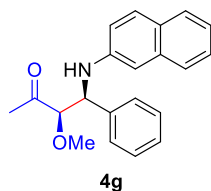

**(3R,4S)-3-methoxy-4-(naphthalen-2-ylamino)-4-phenylbutan-2-one (4g)**

Followed the general procedure (Irradiation was conducted for 16 h, followed by the asymmetric catalytic reaction for 19 h).

74 mg, 77% yield, white solid.

**Diastereomeric ratio (dr):** 89:11.

**Enantiomeric excess (ee):** 94% (*syn*), 79% (*anti*).

$[\alpha]_D^{20} = -67.6^\circ$  ( $c = 0.33$ , CHCl<sub>3</sub>).

$R_f = 0.35$  (Petroleum ether/EtOAc, v/v, 5:1).

Mixture of two diastereomers:

**<sup>1</sup>H NMR (400 MHz, CDCl<sub>3</sub>):** δ 7.61 – 7.54 (m, 2H), 7.44 (d,  $J = 8.2$  Hz, 1H), 7.41 – 7.37 (m, 2H), 7.31 – 7.25 (m, 3H), 7.24 – 7.20 (m, 1H), 7.15 – 7.10 (m, 1H), 6.90 (dd,  $J = 8.8, 2.3$  Hz, 1H), 6.73 (d,  $J = 1.8$  Hz, 0.11H), 6.62 (d,  $J = 2.1$  Hz, 0.89H), 5.02 – 4.89 (m, 1.89H), 4.82 (d,  $J = 5.4$  Hz, 0.11H), 3.99 (d,  $J = 5.2$  Hz, 0.11H), 3.88 (d,  $J = 2.4$  Hz, 0.89H), 3.36 (s, 0.33H), 3.29 (s, 2.67H), 2.16 (s, 2.67H), 1.82 (s, 0.33H).

**<sup>13</sup>C NMR (101 MHz, CDCl<sub>3</sub>):** δ 210.7, 209.9, 144.1, 143.9, 139.5, 138.3, 135.0 × 2 (135.02, 134.95), 129.0 × 2 (129.06, 129.00), 128.6 × 2 (128.62, 128.58), 128.0, 127.8 × 2 (127.84, 127.81),

127.7, 127.6, 127.0, 126.3, 126.2, 126.1, 126.0, 122.4, 122.2, 118.3, 118.0, 106.7, 106.5, 90.5, 89.5, 59.7, 59.4, 59.1, 58.7, 27.3, 26.7.

**HRMS (ESI):** Calculated for C<sub>21</sub>H<sub>22</sub>NO<sub>2</sub> ([M+H]<sup>+</sup>): 320.1645, Found: 320.1643; Calculated for C<sub>21</sub>H<sub>21</sub>NNaO<sub>2</sub> ([M+Na]<sup>+</sup>): 342.1464, Found: 342.1463; Calculated for C<sub>21</sub>H<sub>21</sub>KNO<sub>2</sub> ([M+K]<sup>+</sup>): 358.1204, Found: 358.1200.

**HPLC:** Daicel Chiralpak AD-H, hexane/isopropanol = 97:3, flow rate 1.0 mL/min, λ = 254 nm, retention time: 14.000 min (*syn* major enantiomer), 14.438 min (*syn* minor enantiomer), 16.069 min (*anti* major enantiomer), 23.398 min (*anti* minor enantiomer).

### 13. References

- [1] Leng, L. and J. M. Ready, Photocatalytic  $\alpha$ -alkylation of amines with alkyl halides, *ACS Catal.*, 2020, **10**, 13196–13201.
- [2] X. Yu, C. Liu, L. Jiang and Q. Xu, Manganese dioxide catalyzed *N*-alkylation of sulfonamides and amines with alcohols under air, *Org. Lett.*, 2011, **13**, 6184–6187.
- [3] Y. Zhao, S. W. Foo and S. Saito, Iron/amino acid catalyzed direct *N*-alkylation of amines with alcohols, *Angew. Chem. Int. Ed.*, 2011, **50**, 3006–3009.
- [4] M. Zhang, H. Yang, Y. Zhang, C. Zhu, W. Li, Y. Cheng, and H. Hu, Direct reductive amination of aromatic aldehydes catalyzed by gold(I) complex under transfer hydrogenation conditions, *Chem. Commun.*, 2011, **47**, 6605–6607.
- [5] L. Ou, J. Shao, G. Zhang and Y. Yu, Metal-free carbon-nitrogen bond-forming coupling reaction between arylboronic acids and organic azides, *Tetrahedron Lett.*, 2011, **52**, 1430–1431.
- [6] Z.-H. Wang, P.-S. Gao, X. Wang, J.-Q. Gao, X.-T. Xu, Z. He, C. Ma and T.-S. Mei, TEMPO-enabled electrochemical enantioselective oxidative coupling of secondary acyclic amines with ketones, *J. Am. Chem. Soc.*, 2021, **143**, 15599–15605
- [7] S.-B. Han, J.Y. Wei, X.-C. Peng, R. Liu, S.-S. Gong, Q. Sun, Hf(OTf)<sub>4</sub> as a highly potent catalyst for the synthesis of Mannich base under solvent-free conditions, *Molecules*, 2020, **25**, 388.
- [8] C.-L. Dong, X. Ding, L.-Q. Huang, Y.-H. He, and Z. Guan, Merging visible light photocatalysis and L-/D-proline catalysis: direct asymmetric oxidative dearomatization of 2-arylindoles to



- access C2-quaternary indolin-3-ones, *Org. Lett.*, 2020, **22**, 1076–1080.
- [9] G. Kang, Z. Luo, C. Liu, H. Gao, Q. Wu, H. Wu, and J. Jiang, Amino acid salts catalyzed asymmetric aldol reaction of Tryptanthrin: a straightforward synthesis of Phaitanthrin A and its derivatives, *Org. Lett.*, 2013, **15**, 4738–4741.
- [10] B. List, The direct catalytic asymmetric three-component Mannich reaction, *J. Am. Chem. Soc.*, 2000, **122**, 9336–9337.
- [11] X.-D. Jia, X.-E. Wang, C.-X. Yang, C.-D. Huo, W.-J. Wang, Y. Ren and X.-C. Wang, Synthesis of  $\beta$ -aminoketones and construction of highly substituted 4-piperidones by Mannich reaction induced by persistent radical cation salts, *Org. Lett.*, 2010, **12**, 732–735.
- [12] K. Li, T. He, C. Li, X.-W. Feng, N. Wang and X.-Q. Yu, Lipase-catalysed direct Mannich reaction in water: utilization of biocatalytic promiscuity for C-C bond formation in a “one-pot” synthesis, *Green Chem.*, 2009, **11**, 777–779.
- [13] W. Notz, S.-I. Watanabe, N. S. Chowdari, G. Zhong, J. M. Betancort, F. Tanaka and C. F. Barbas III, The scope of the direct proline-catalyzed asymmetric addition of ketone to imines, *Adv. Synth. Catal.*, 2004, **346**, 1131–1140.
- [14] N. S. Josephsohn, M. L. Snapper and A. H. Hoveyda, Ag-catalyzed asymmetric Mannich reactions of enol ethers with aryl, alkyl, alkenyl, and alkynyl imines, *J. Am. Chem. Soc.*, 2004, **126**, 3734–3735.
- [15] V. Kumar, U. Sharma, P. K. Verma, N. Kumar, and B. Singh, Silica-supported boric acid with ionic liquid: a novel recyclable catalytic system for one-pot three-component Mannich reaction, *Chem. Pharm. Bull.*, 2011, **59**, 639–645.
- [16] M. Xia, and Y.-D. Lu, A novel direct and one-pot Mannich synthesis of fluorinated  $\beta$ -aminobutanones with sulfamic acid as a green catalyst, *J. Fluorine Chem.*, 2006, **127**, 1119–1124.
- [17] J. Lei, L. Peng, R. Qiu, Y. Liu, Y. Chen, C.-T. Au and S.-T. Yin, Establishing the correlation between catalytic performance and N $\rightarrow$ Sb donor-acceptor interaction: systematic assessment of azastivocine halide derivatives as water tolerant Lewis acids, *Dalton Trans.*, 2019, **48**, 8478–8487.
- [18] Y. An, Q. Qin, C. Wang and J. Tao, Isosteviol-amino acid conjugates as highly efficient organocatalysts for the asymmetric one-pot three-component Mannich reactions, *Chin. J.*

*Chem.*, 2011, **29**, 1511–1517.

[19] A. Yanagisawa, Y. Lin, R. Miyake and K. Yoshida, Catalytic Enantioselective Mannich-Type Reaction via a Chiral Silver Enolate, *Org. Lett.*, 2014, **16**, 86–89.

[20] H. Zhang, S. Mitsumori, N. Utsumi, M. Imai, N. Garcia-Delgado, M. Mifud, K. Albertshofer, P. H. -Y. Cheong, K. N. Houk, F. Tanaka and C. F. Barbas, Catalysis of 3-pyrrolidinecarboxylic acid and related pyrrolidine derivatives in enantioselective *anti*-Mannich-type reactions: importance of the 3-acid group on pyrrolidine for stereocontrol, *J. Am. Chem. Soc.*, 2008, **130**, 875–886.

## 14. NMR spectra

### <sup>1</sup>H NMR Spectrum (600 MHz, CDCl<sub>3</sub>) of 1c

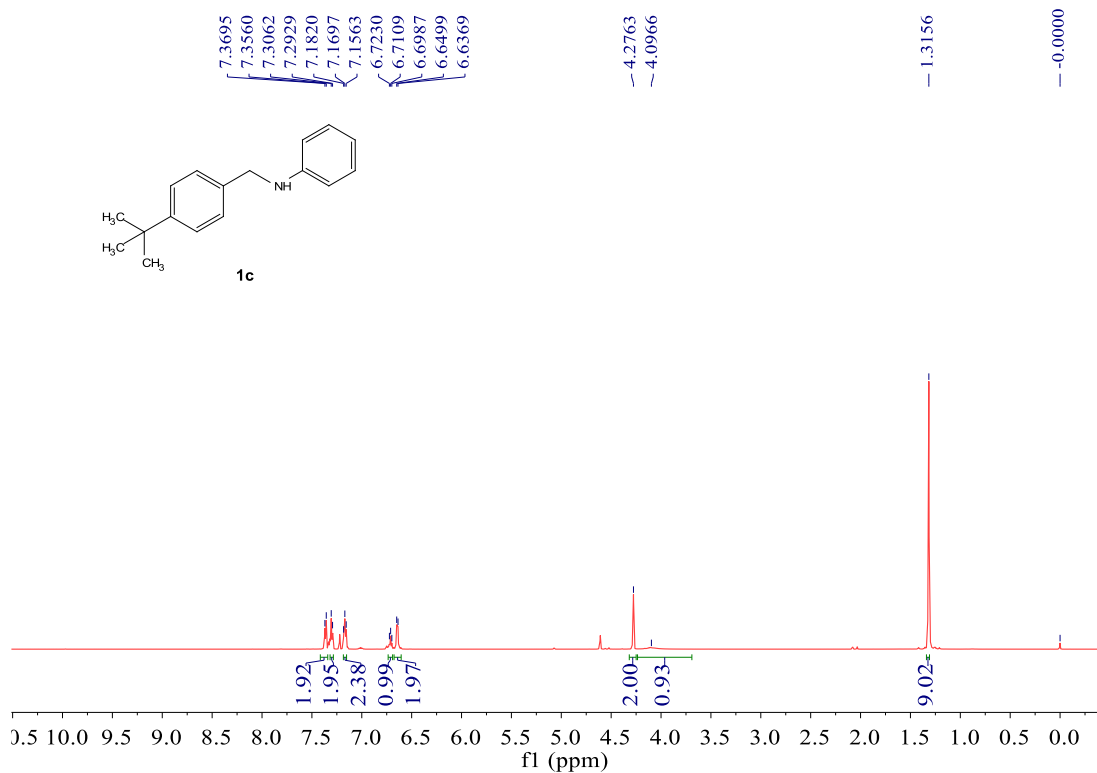

### <sup>13</sup>C NMR Spectrum (151 MHz, CDCl<sub>3</sub>) of 1c

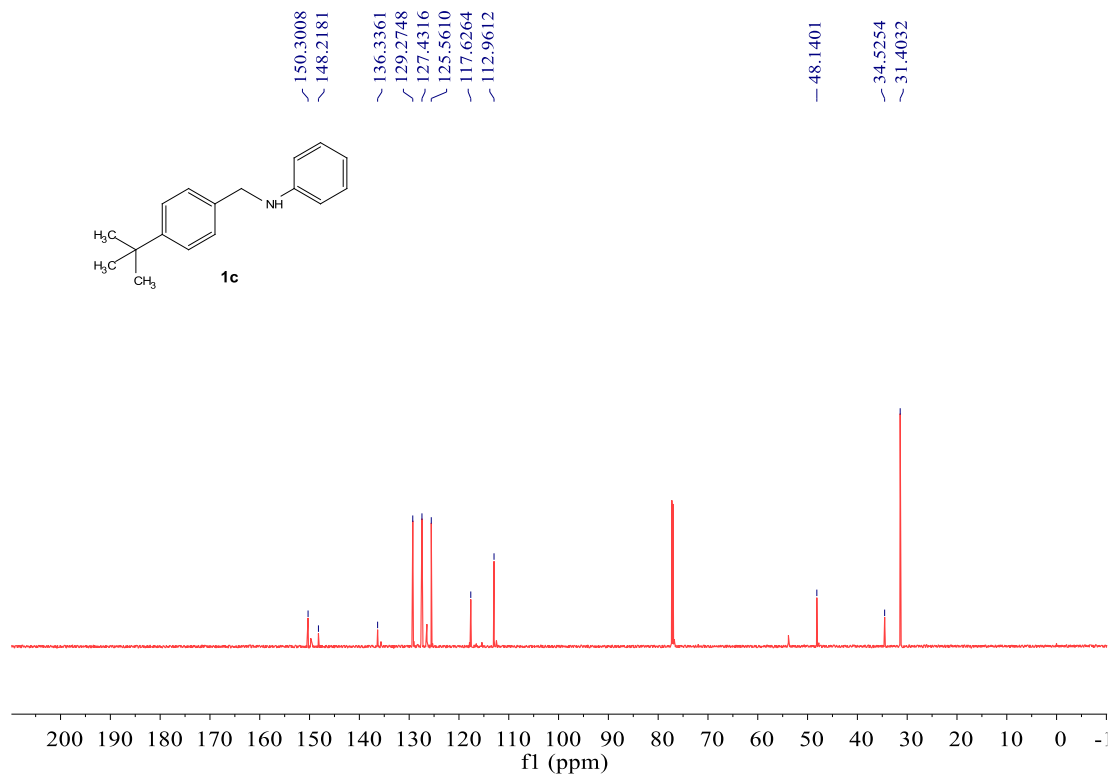

### <sup>1</sup>H NMR Spectrum (600 MHz, CDCl<sub>3</sub>) of 1d

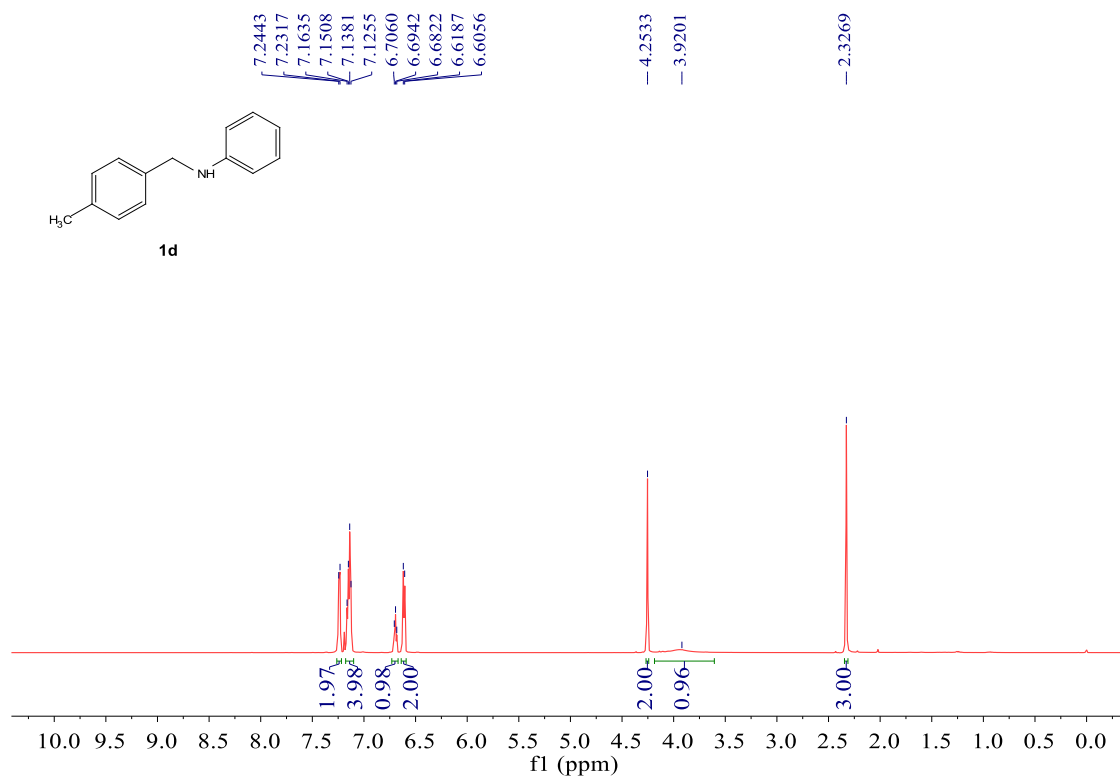

### <sup>13</sup>C NMR Spectrum (151 MHz, CDCl<sub>3</sub>) of 1d

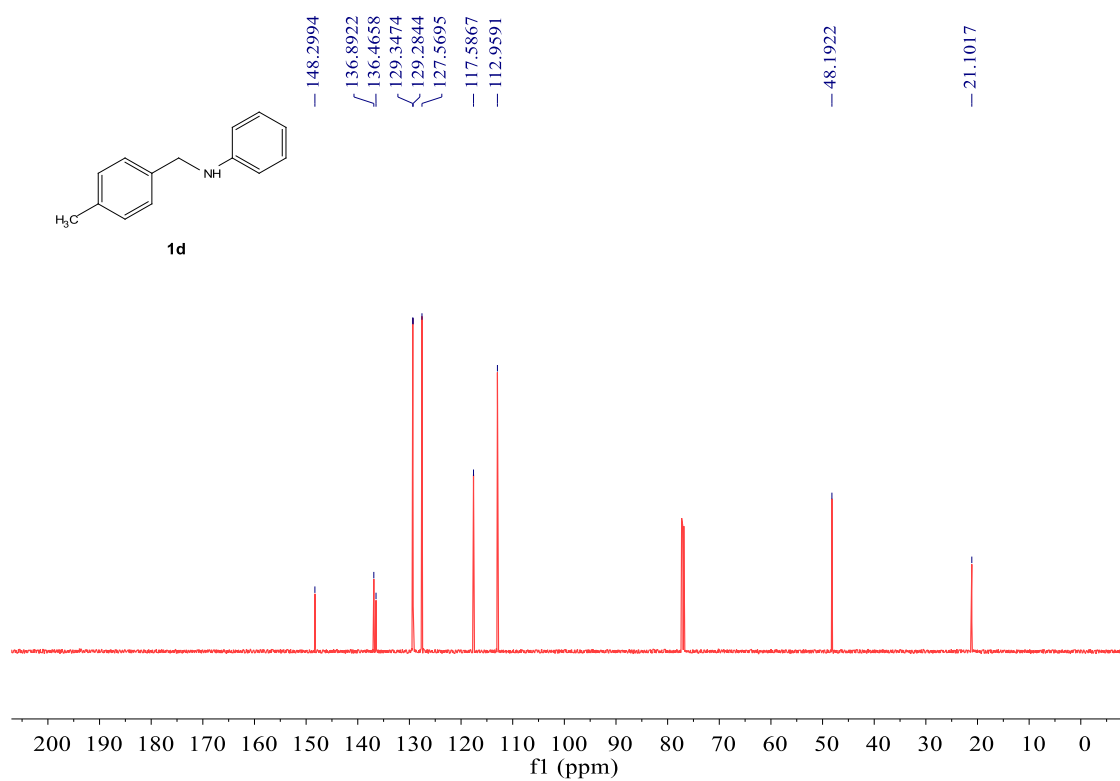

### <sup>1</sup>H NMR Spectrum (600 MHz, CDCl<sub>3</sub>) of 1e

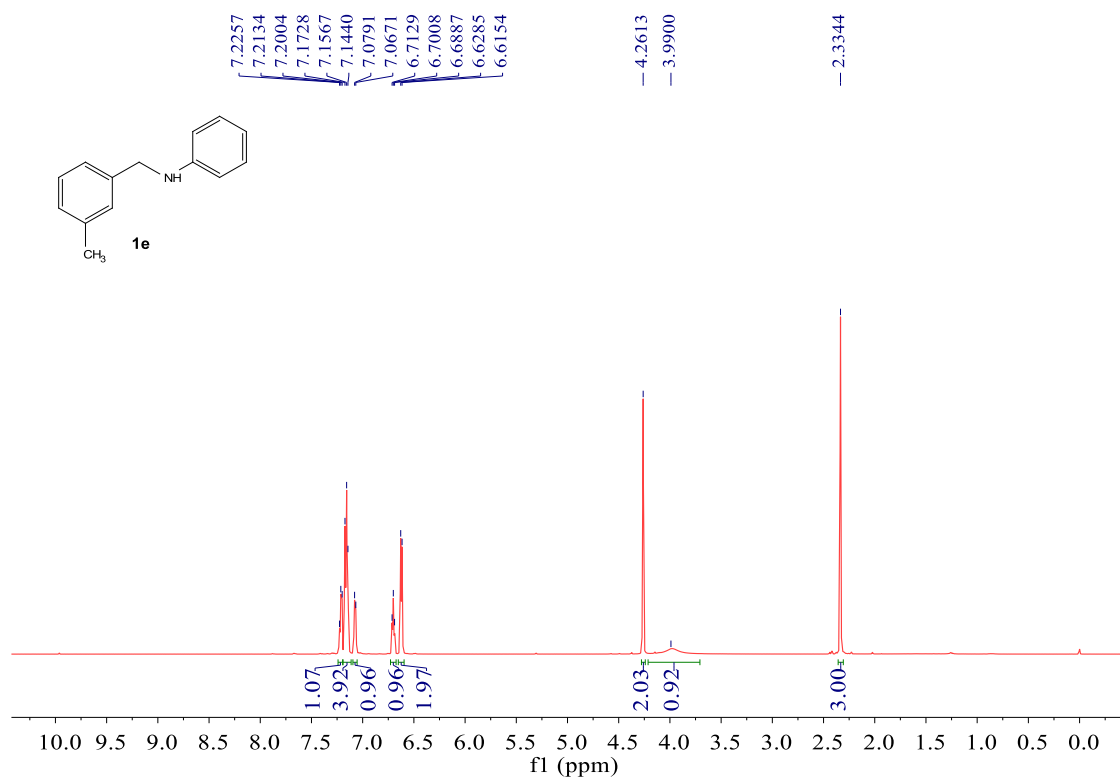

### <sup>13</sup>C NMR Spectrum (151 MHz, CDCl<sub>3</sub>) of 1e

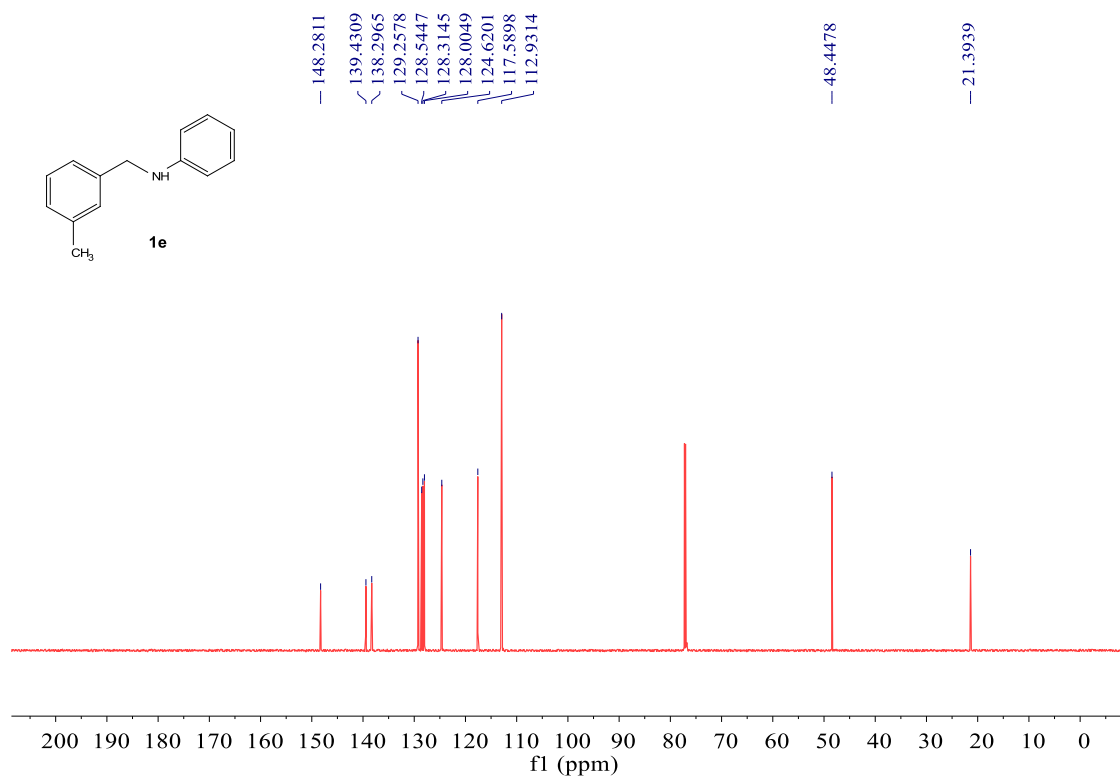

### <sup>1</sup>H NMR Spectrum (600 MHz, CDCl<sub>3</sub>) of **1f**

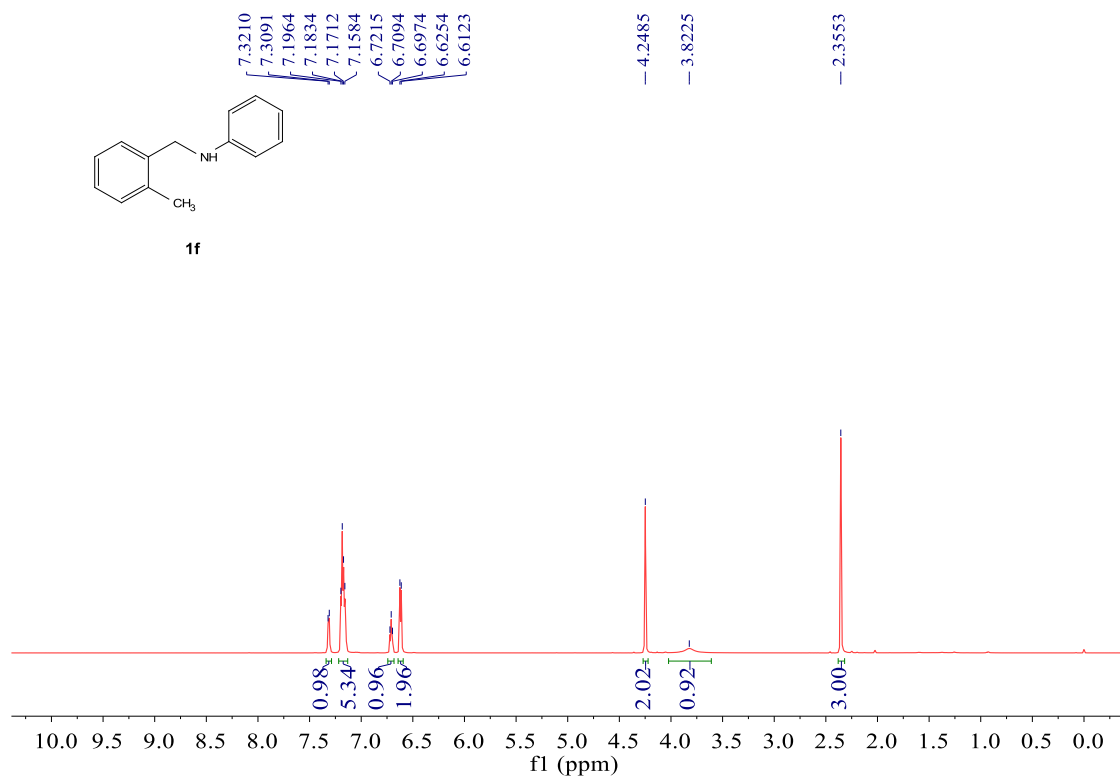

### <sup>13</sup>C NMR Spectrum (151 MHz, CDCl<sub>3</sub>) of **1f**

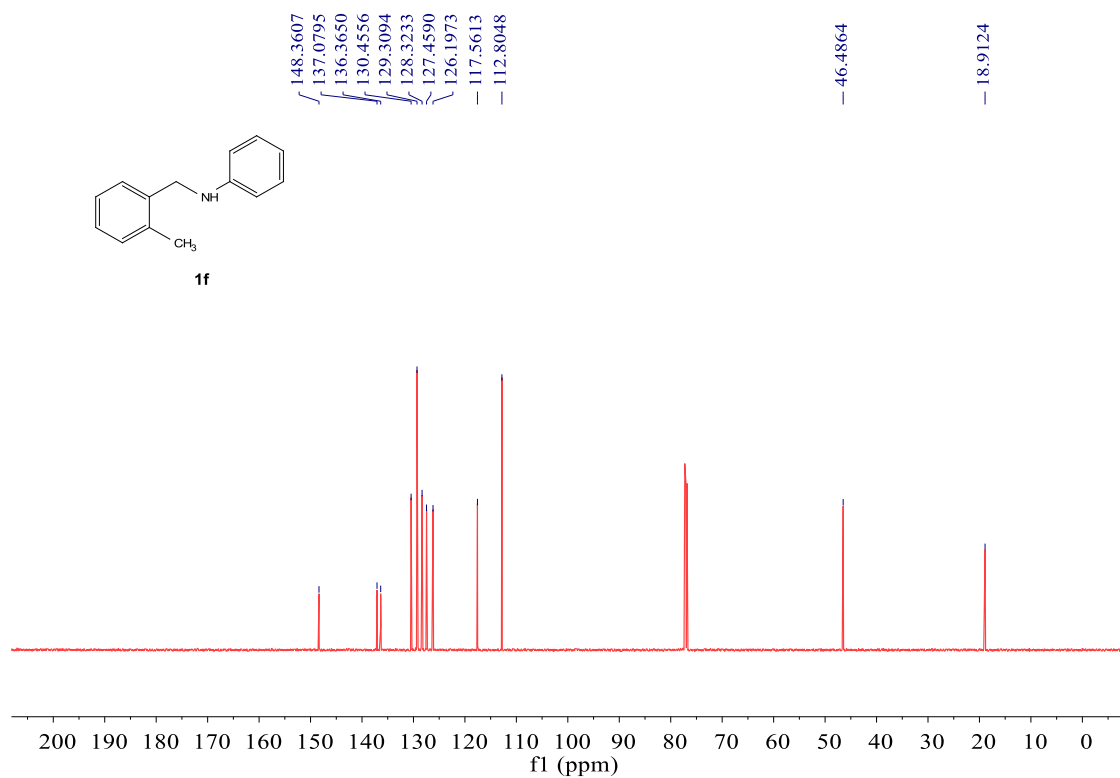

### <sup>1</sup>H NMR Spectrum (600 MHz, CDCl<sub>3</sub>) of 1g

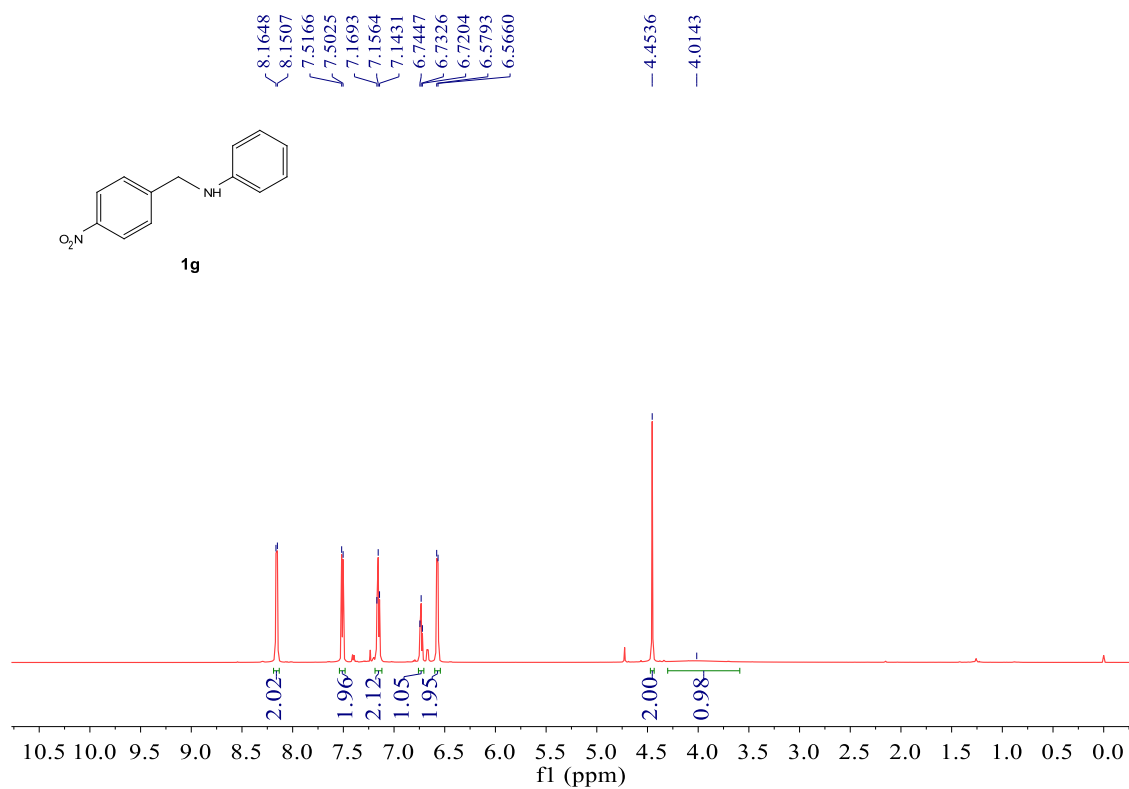

### <sup>13</sup>C NMR Spectrum (151 MHz, CDCl<sub>3</sub>) of 1g

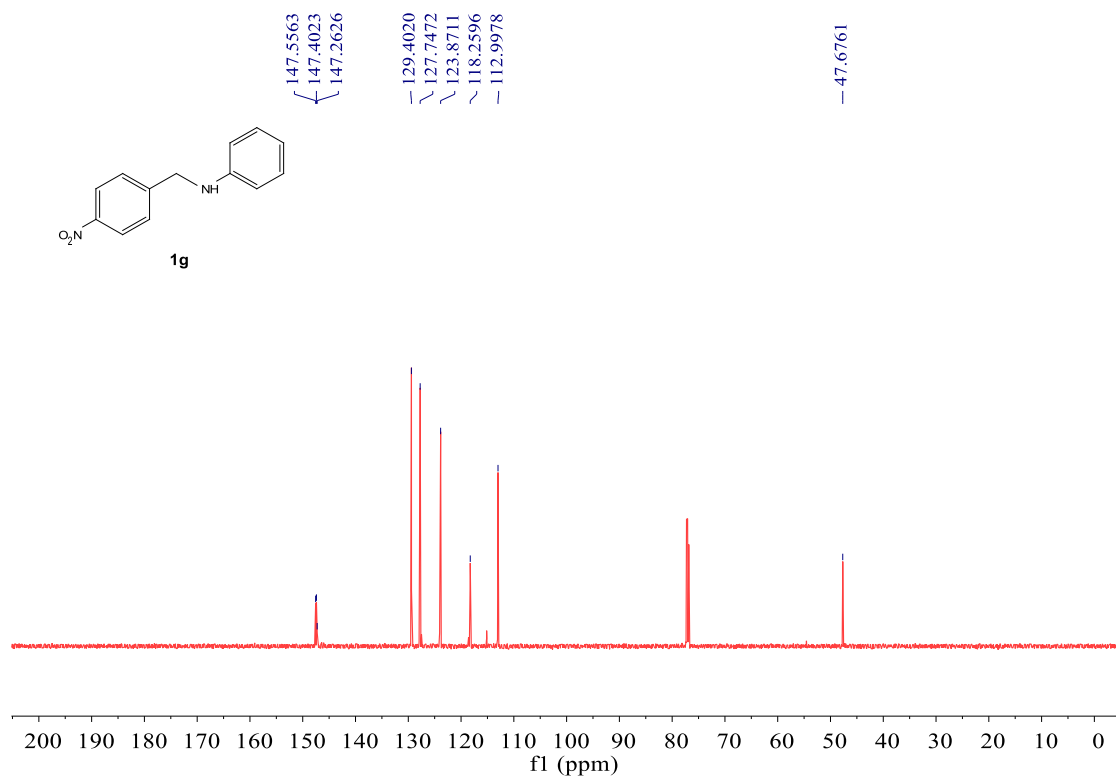

### <sup>1</sup>H NMR Spectrum (600 MHz, CDCl<sub>3</sub>) of 1h

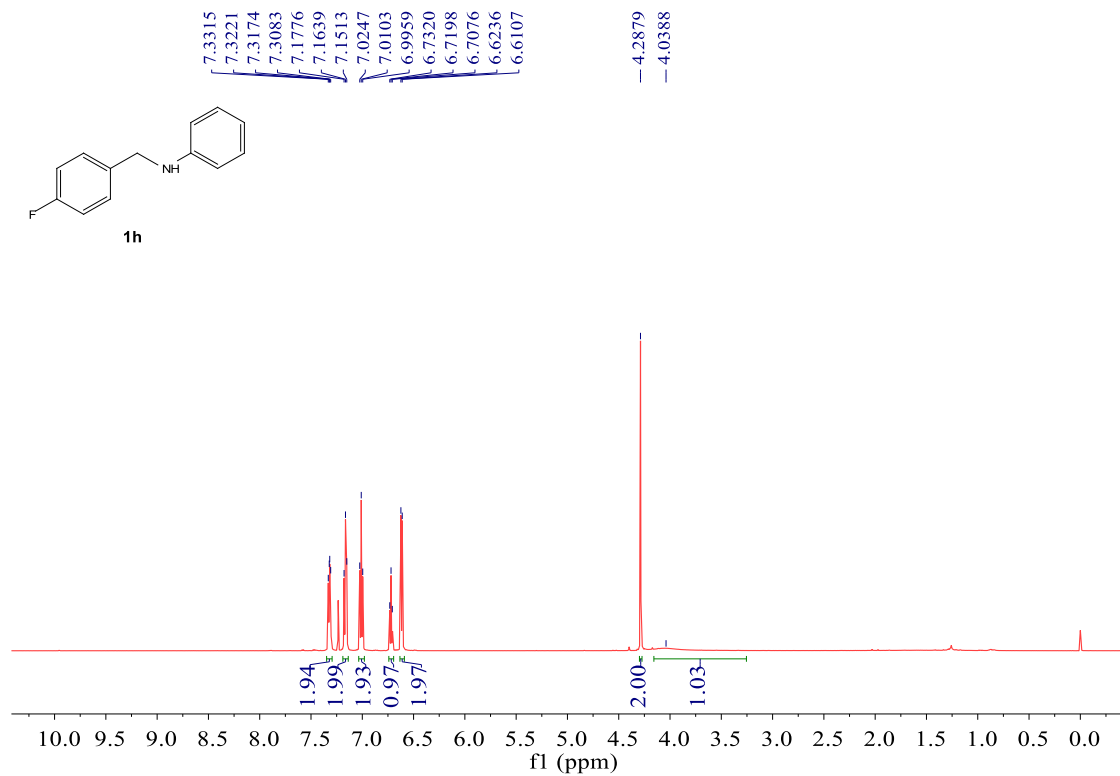

### <sup>13</sup>C NMR Spectrum (151 MHz, CDCl<sub>3</sub>) of 1h

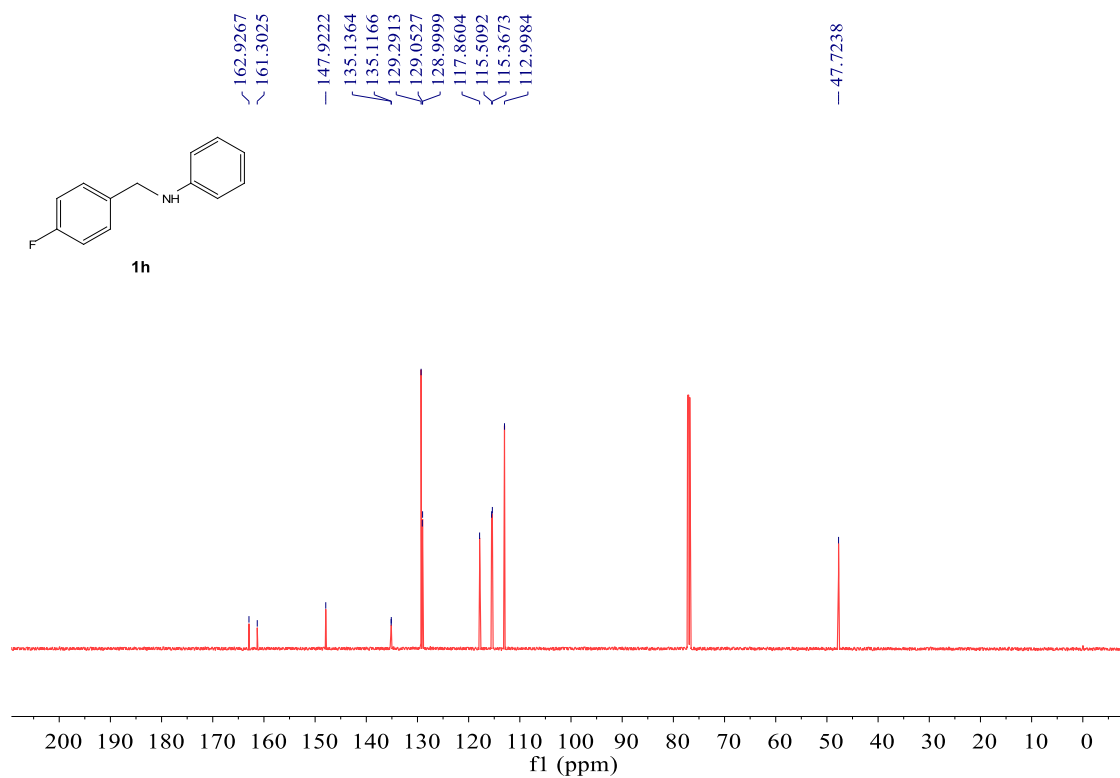



**<sup>19</sup>F NMR Spectrum (376 MHz, CDCl<sub>3</sub>) of 1h**

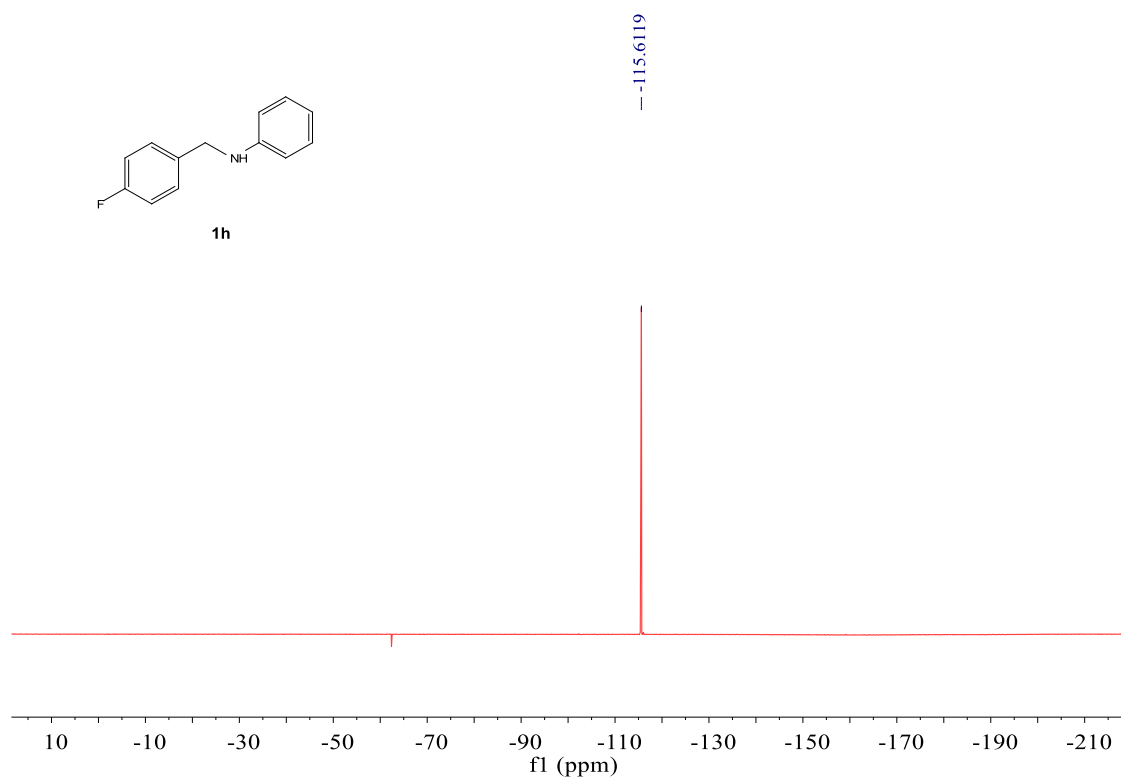

**<sup>1</sup>H NMR Spectrum (600 MHz, CDCl<sub>3</sub>) of 1i**

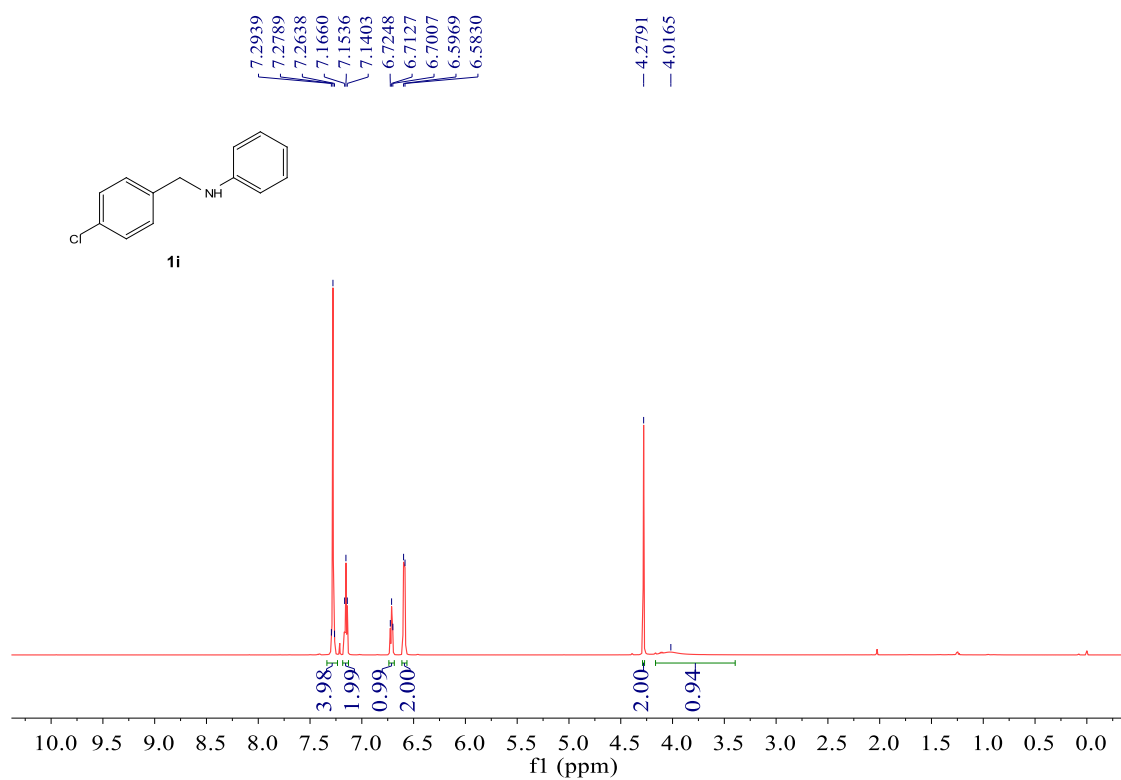

**<sup>13</sup>C NMR Spectrum (151 MHz, CDCl<sub>3</sub>) of 1i**

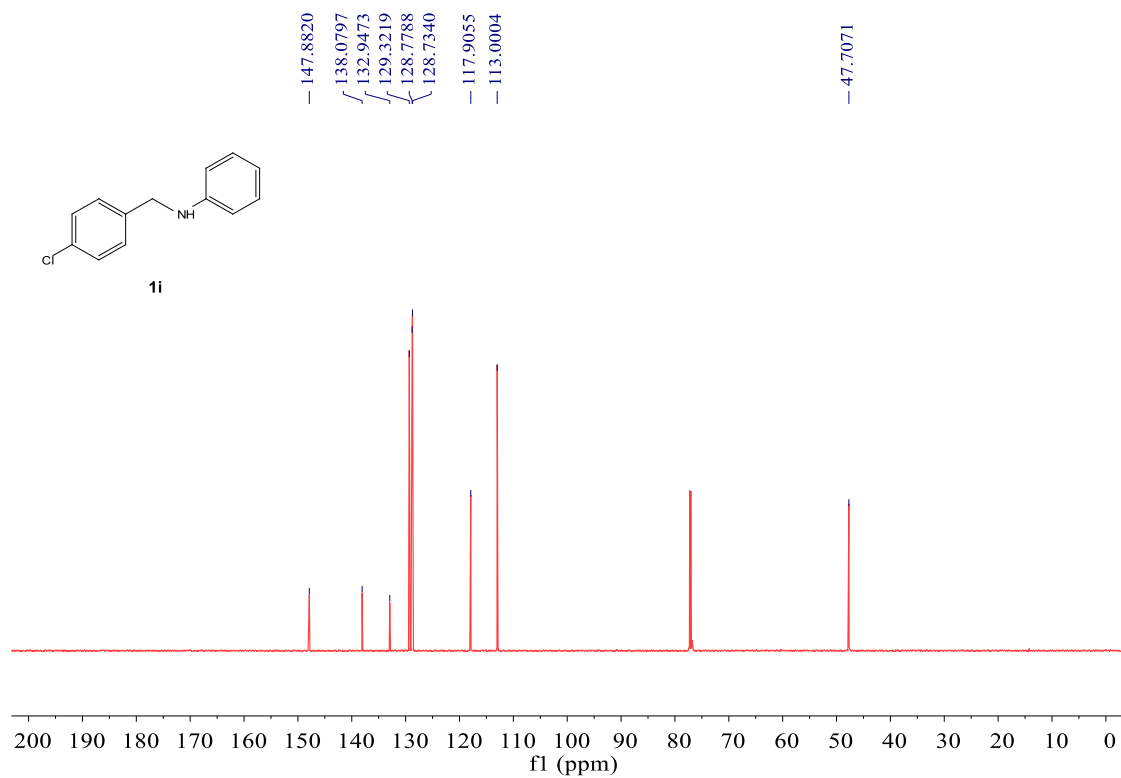

**<sup>1</sup>H NMR Spectrum (600 MHz, CDCl<sub>3</sub>) of 1j**

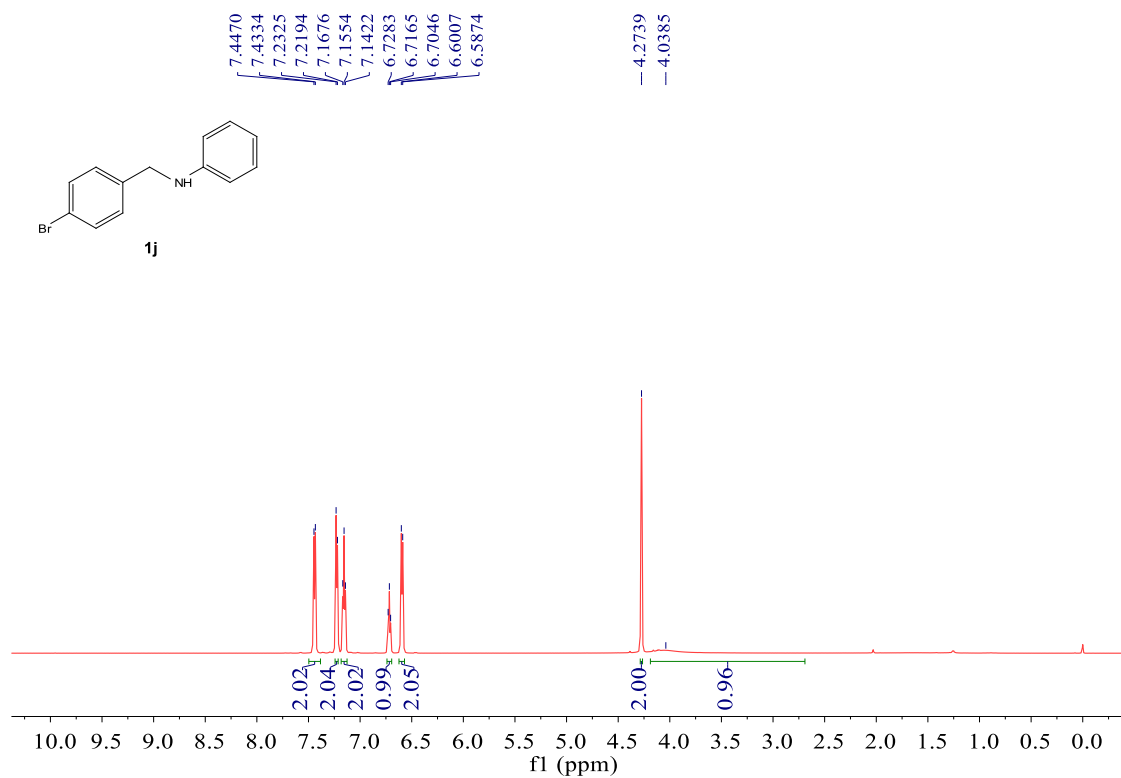

**<sup>13</sup>C NMR Spectrum (151 MHz, CDCl<sub>3</sub>) of 1j**

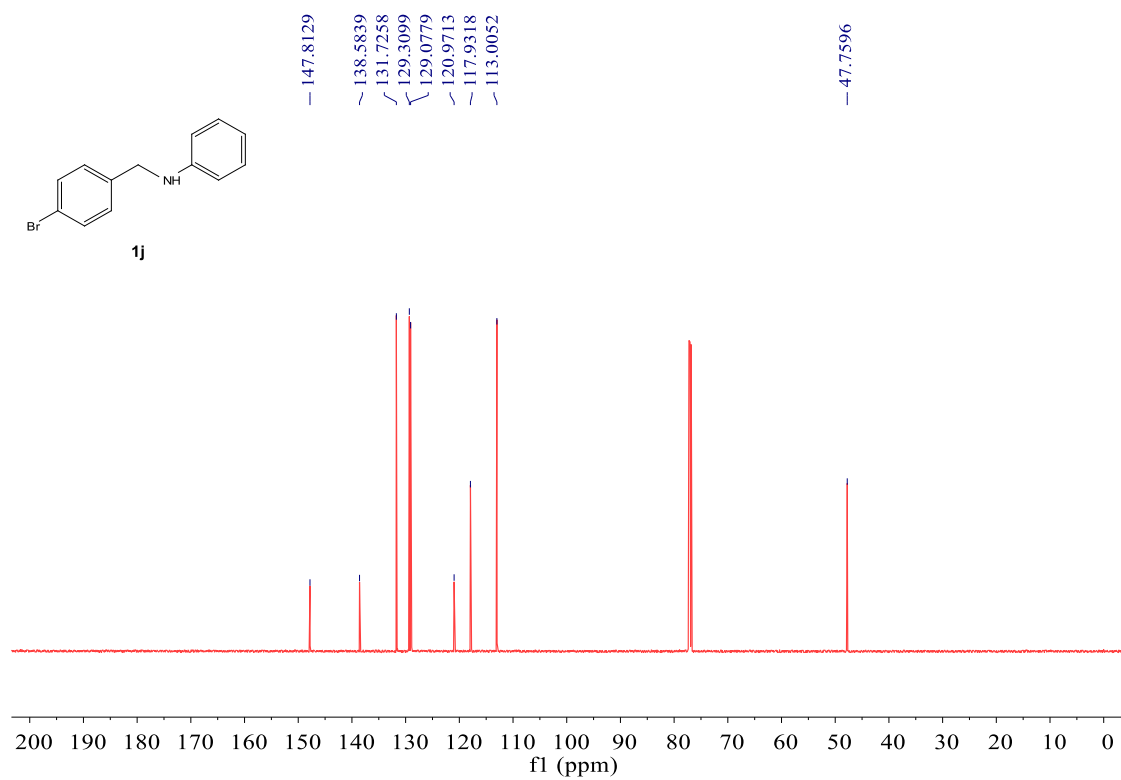

**<sup>1</sup>H NMR Spectrum (600 MHz, CDCl<sub>3</sub>) of 1k**

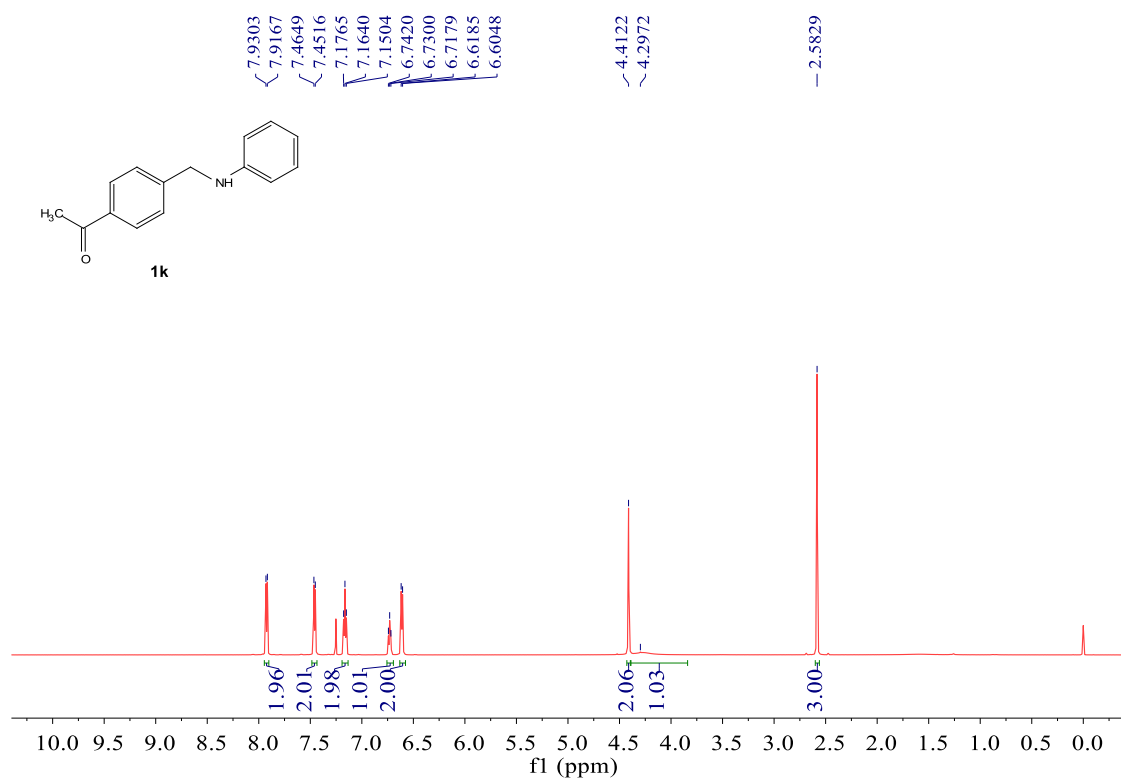

### <sup>13</sup>C NMR Spectrum (151 MHz, CDCl<sub>3</sub>) of 1k

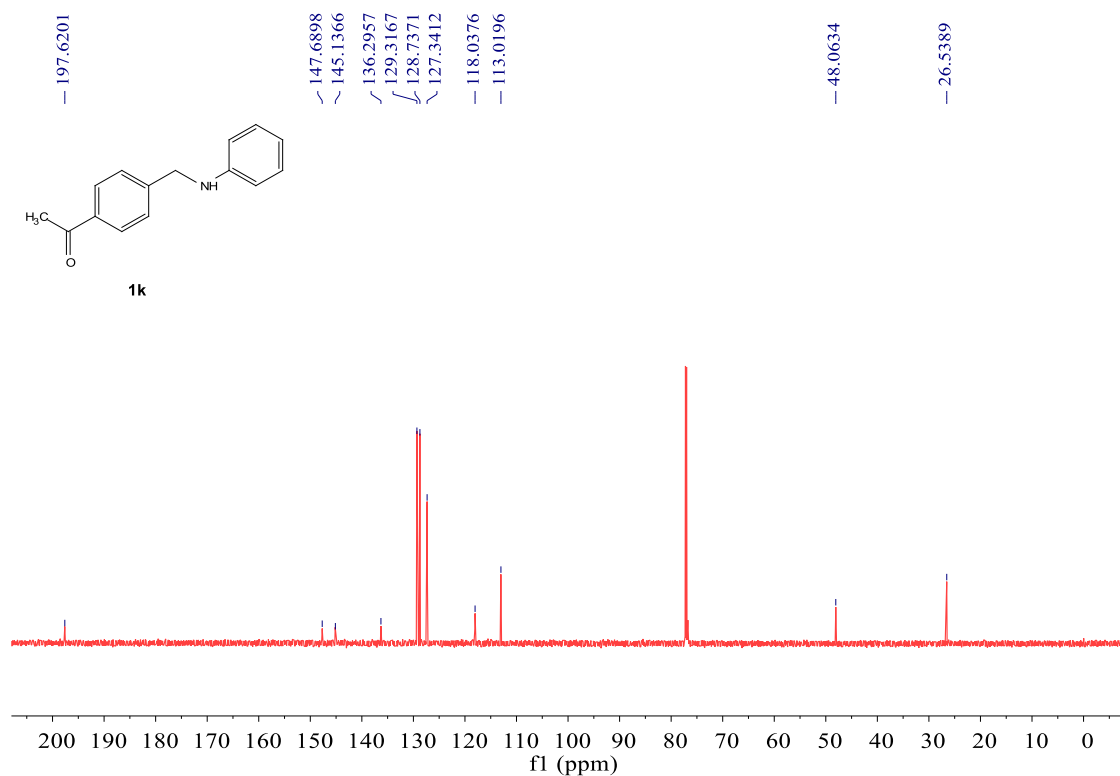

### <sup>1</sup>H NMR Spectrum (600 MHz, CDCl<sub>3</sub>) of 1l

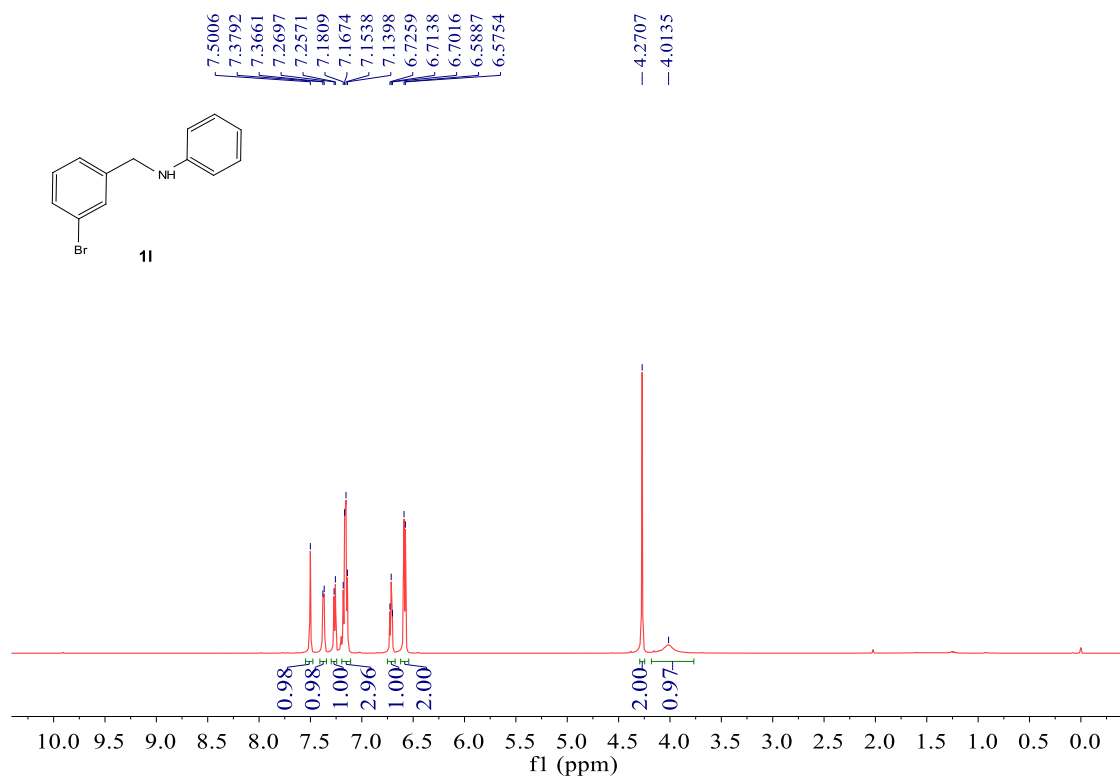

### <sup>13</sup>C NMR Spectrum (151 MHz, CDCl<sub>3</sub>) of **1l**

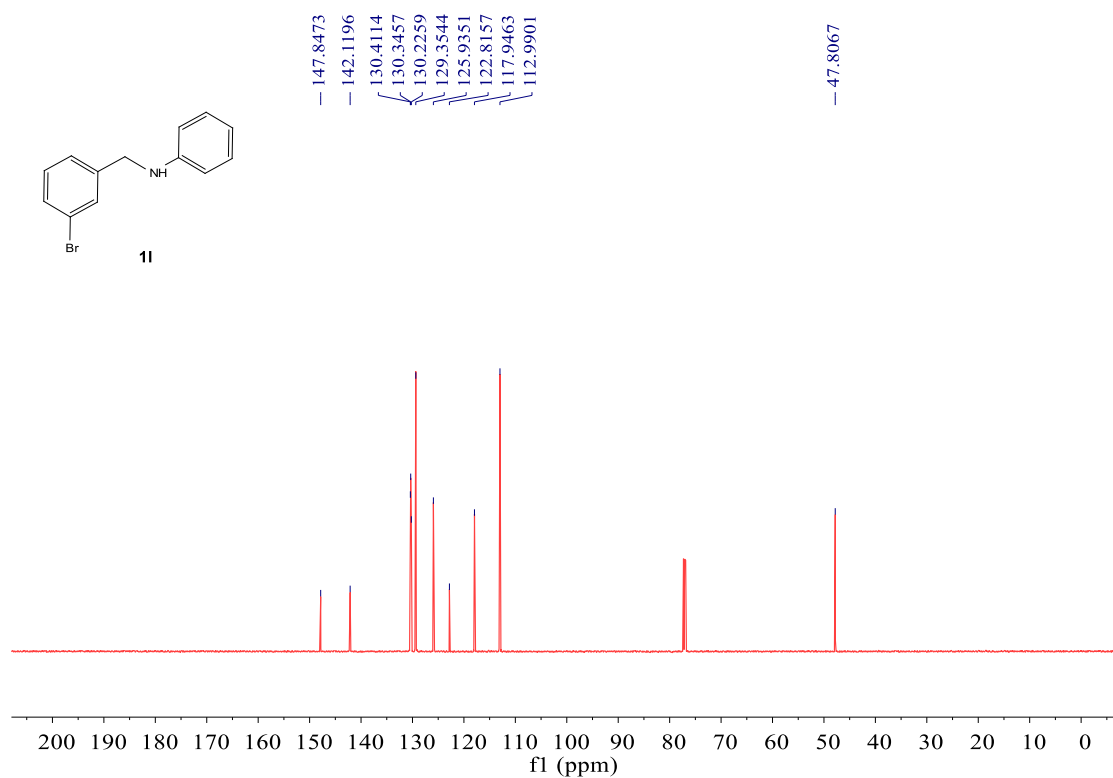

### <sup>1</sup>H NMR Spectrum (600 MHz, CDCl<sub>3</sub>) of **1m**

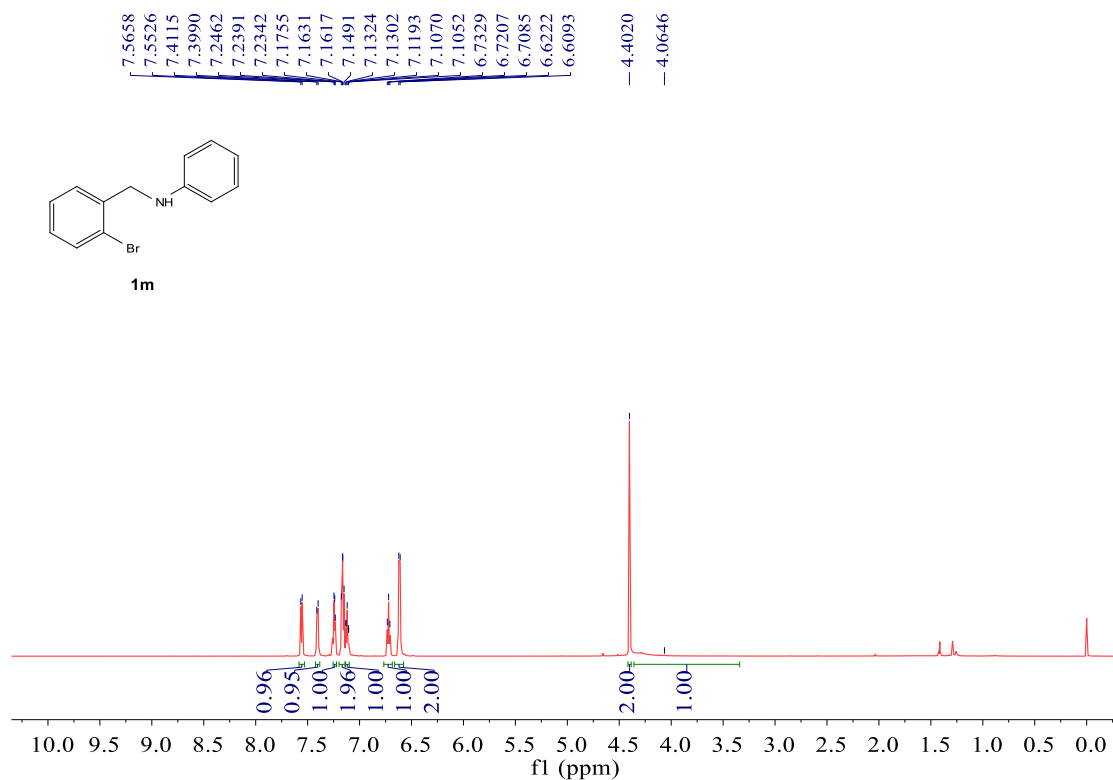

**<sup>13</sup>C NMR Spectrum (151 MHz, CDCl<sub>3</sub>) of 1m**

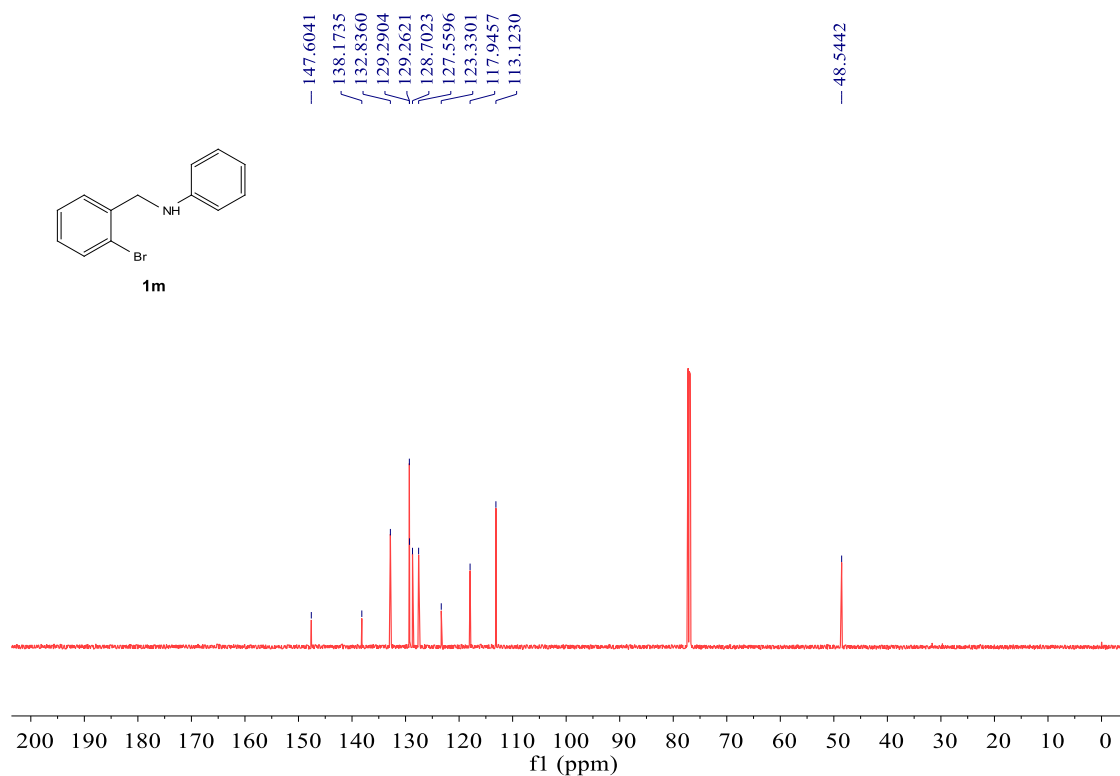

**<sup>1</sup>H NMR Spectrum (600 MHz, CDCl<sub>3</sub>) of 1n**

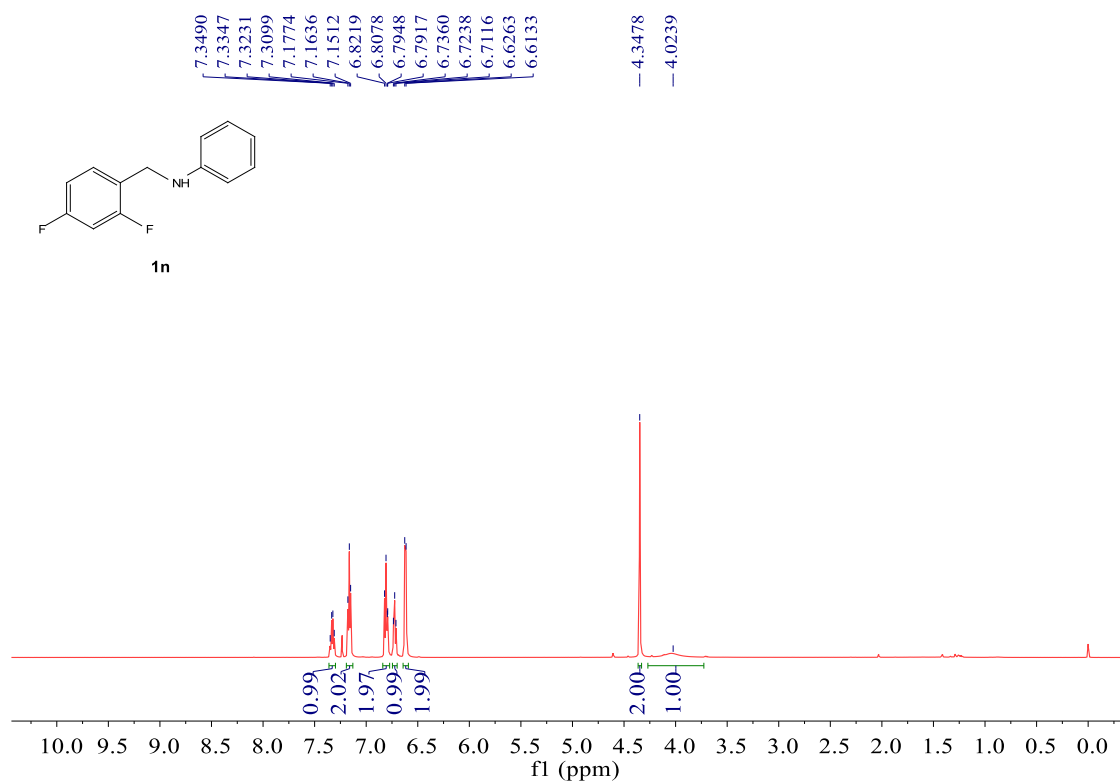

### <sup>13</sup>C NMR Spectrum (151 MHz, CDCl<sub>3</sub>) of **1n**

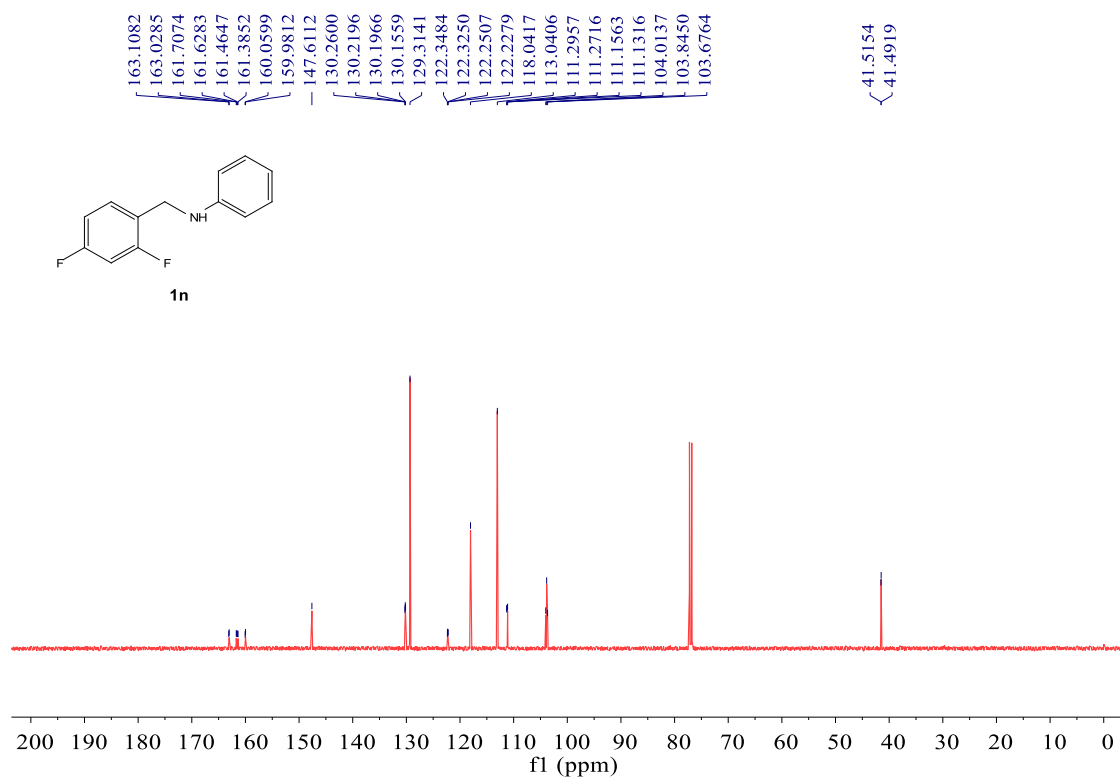

### <sup>19</sup>F NMR Spectrum (565 MHz, CDCl<sub>3</sub>) of **1n**

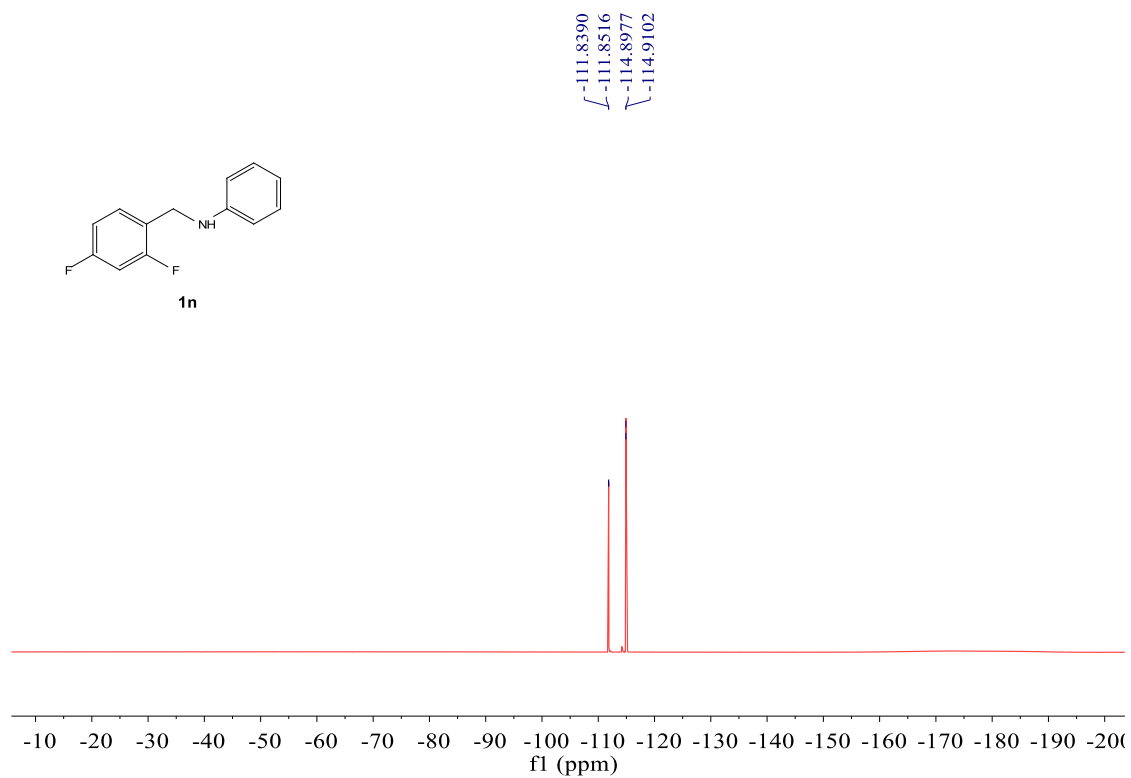

### <sup>1</sup>H NMR Spectrum (600 MHz, CDCl<sub>3</sub>) of 1o

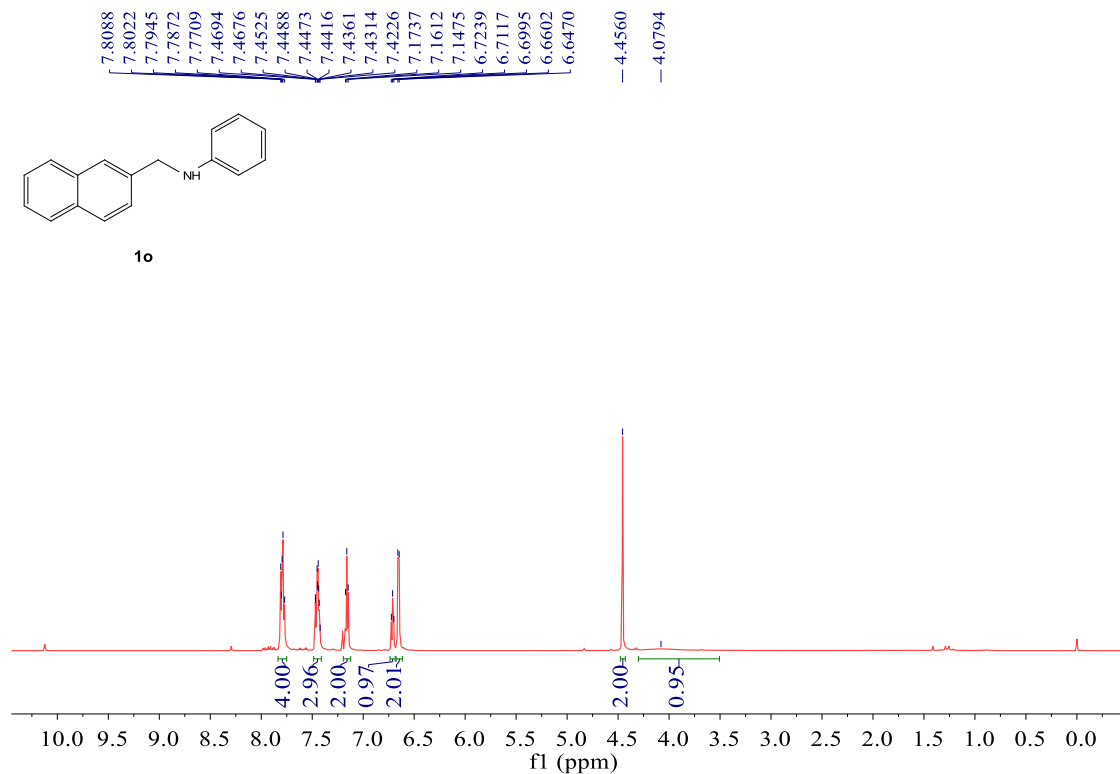

### <sup>13</sup>C NMR Spectrum (151 MHz, CDCl<sub>3</sub>) of 1o

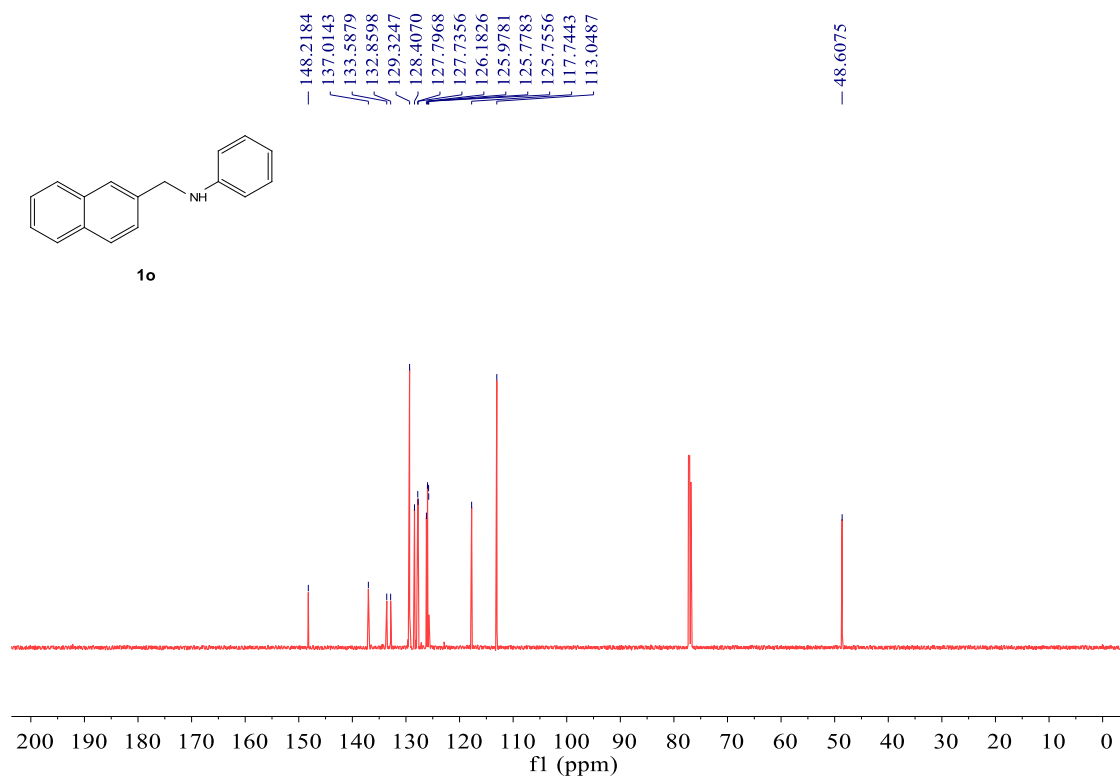



### <sup>1</sup>H NMR Spectrum (400 MHz, CDCl<sub>3</sub>) of 1t

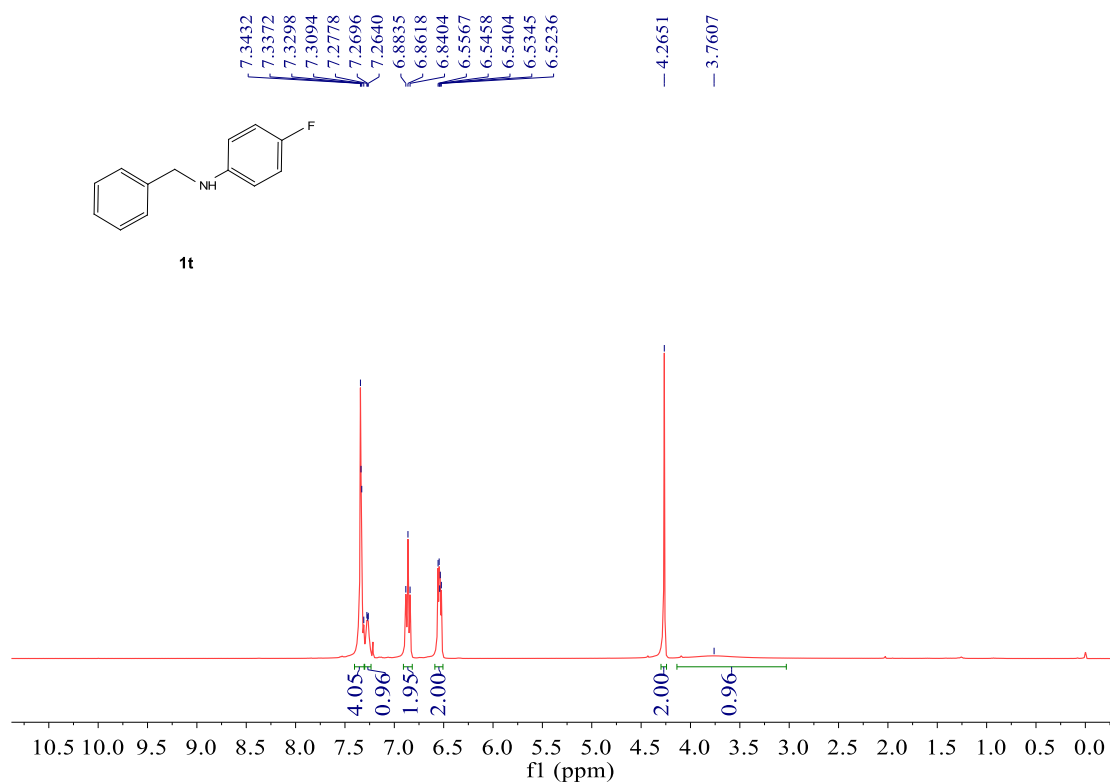

### <sup>13</sup>C NMR Spectrum (101 MHz, CDCl<sub>3</sub>) of 1t

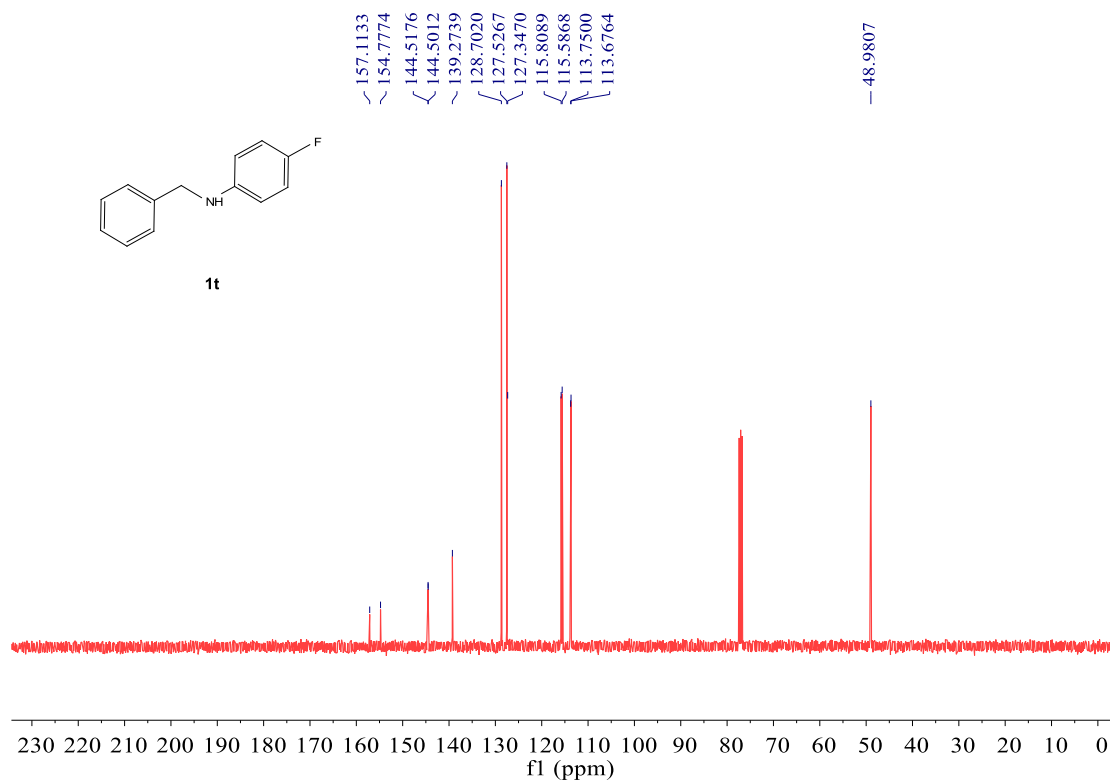

**<sup>19</sup>F NMR Spectrum (376 MHz, CDCl<sub>3</sub>) of 1t**

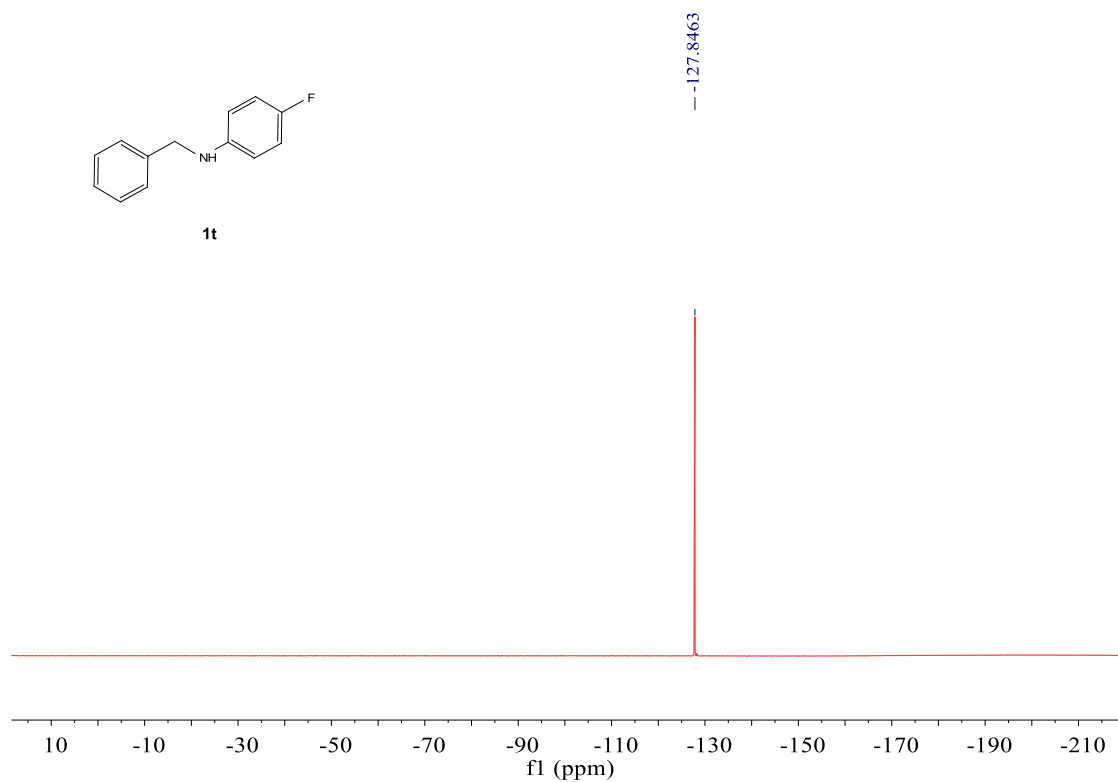

**<sup>1</sup>H NMR Spectrum (600 MHz, CDCl<sub>3</sub>) of 1u**

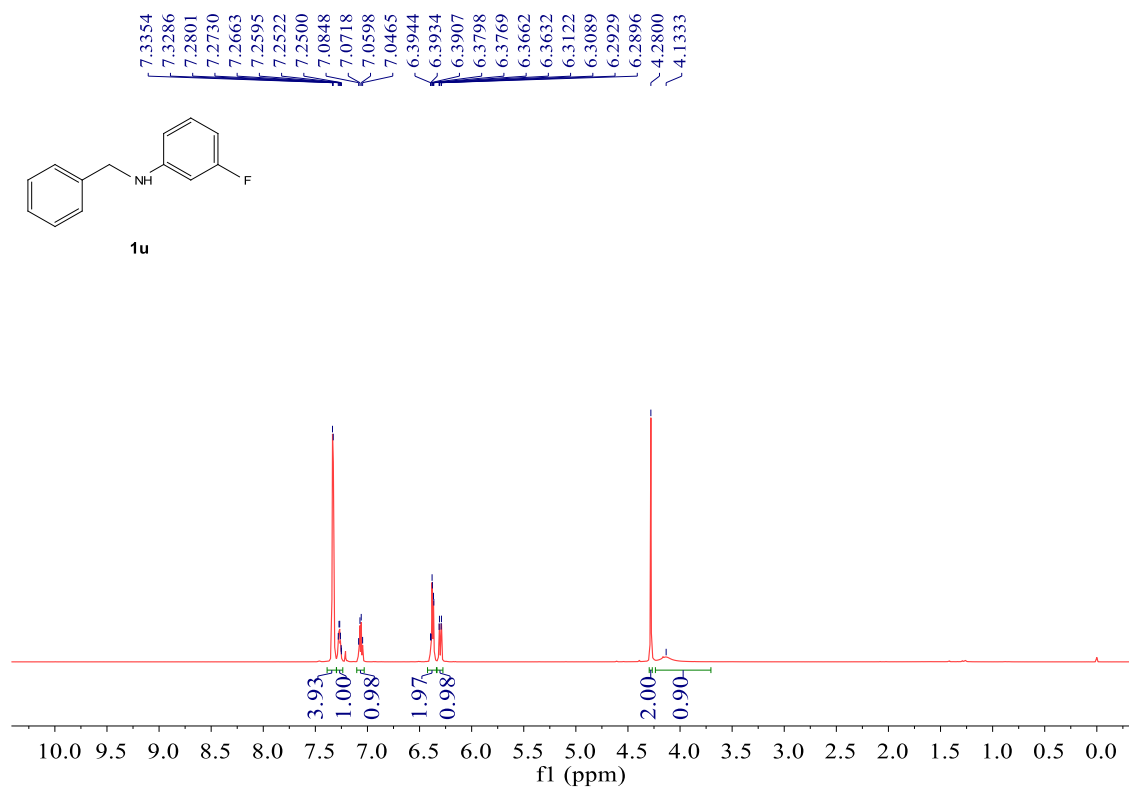

**<sup>13</sup>C NMR Spectrum (151 MHz, CDCl<sub>3</sub>) of 1u**

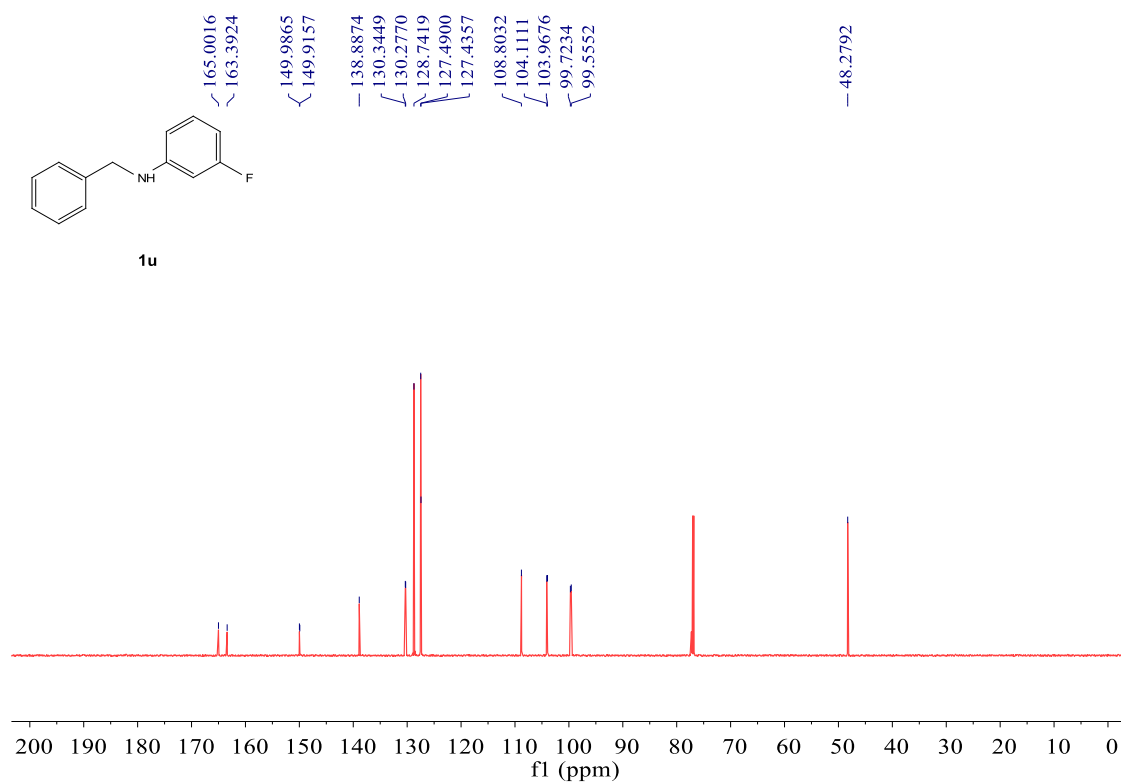

**<sup>19</sup>F NMR Spectrum (565 MHz, CDCl<sub>3</sub>) of 1u**

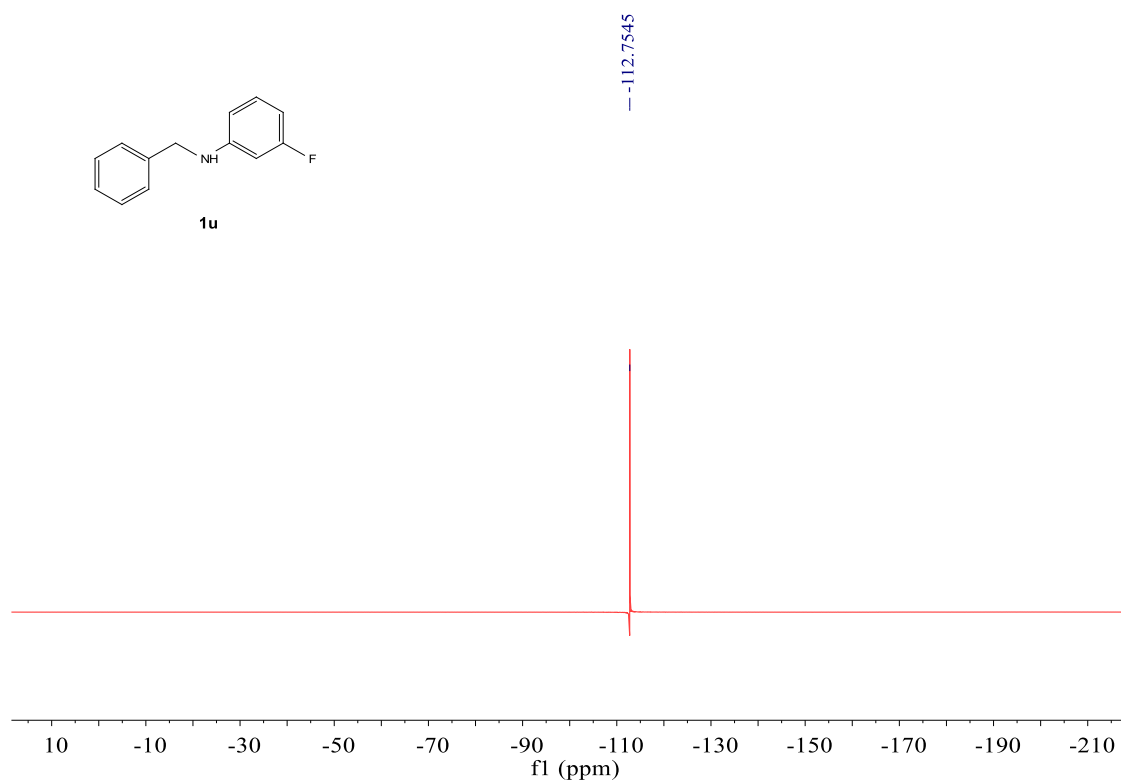

### <sup>1</sup>H NMR Spectrum (600 MHz, CDCl<sub>3</sub>) of 1am

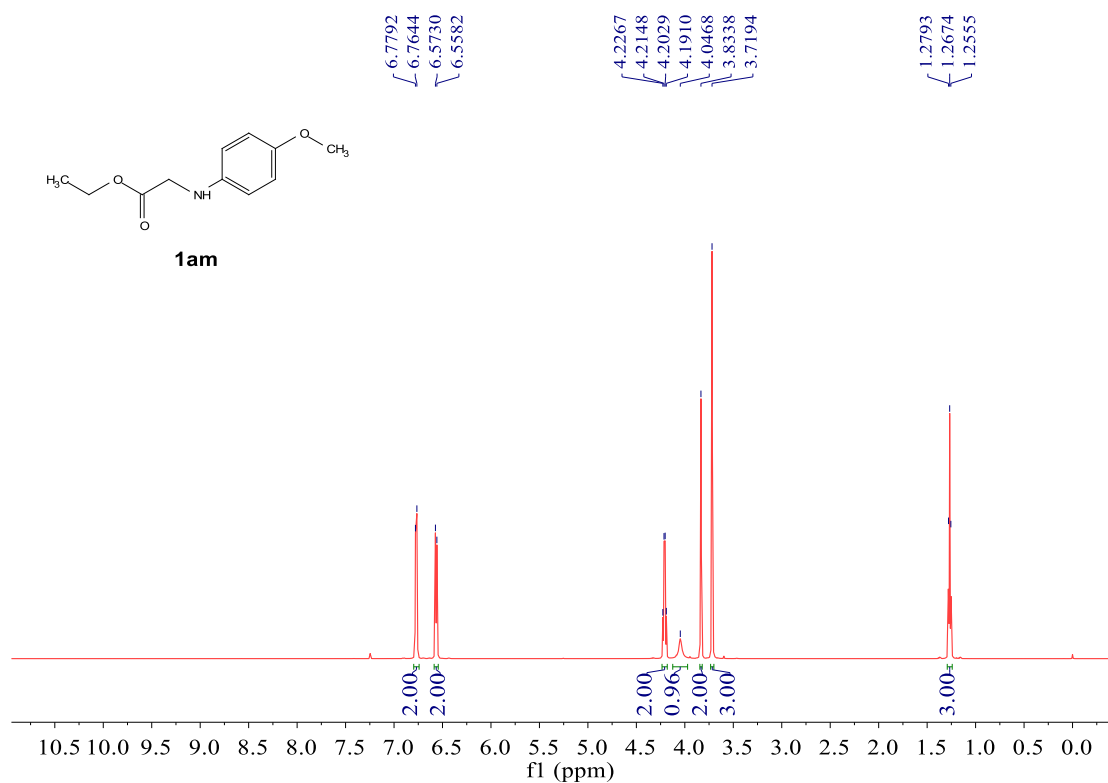

### <sup>13</sup>C NMR Spectrum (151 MHz, CDCl<sub>3</sub>) of 1am

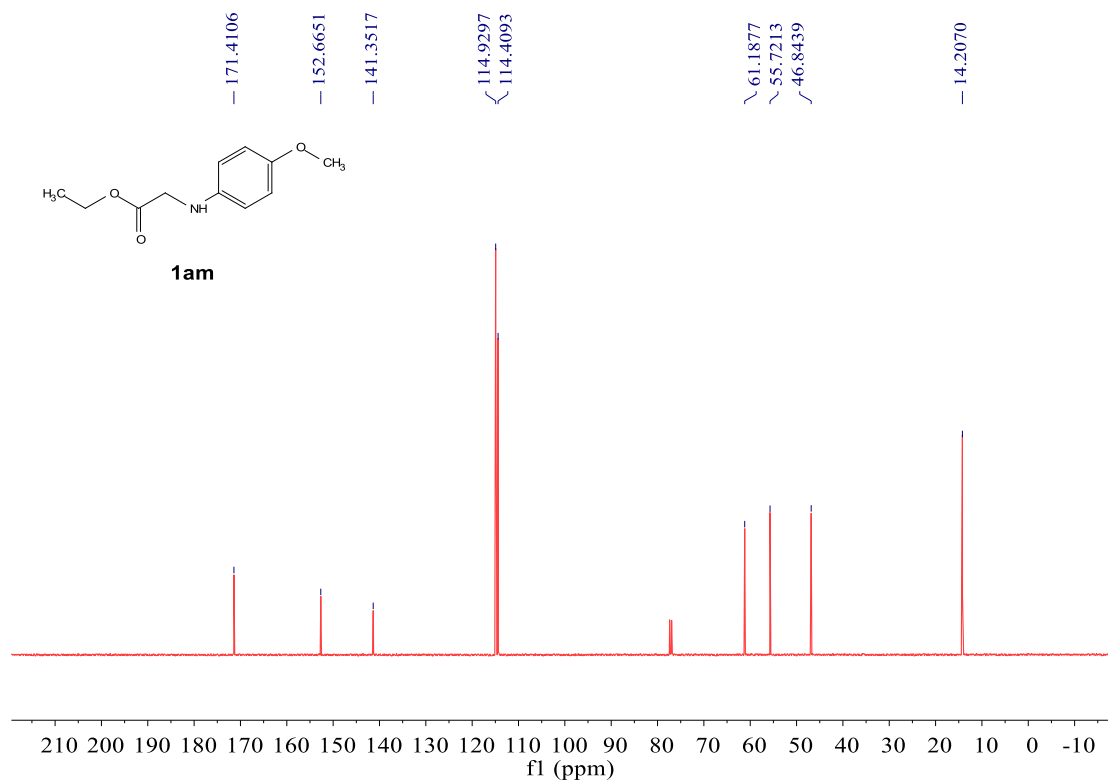

### <sup>1</sup>H NMR Spectrum (600 MHz, CDCl<sub>3</sub>) of 3a

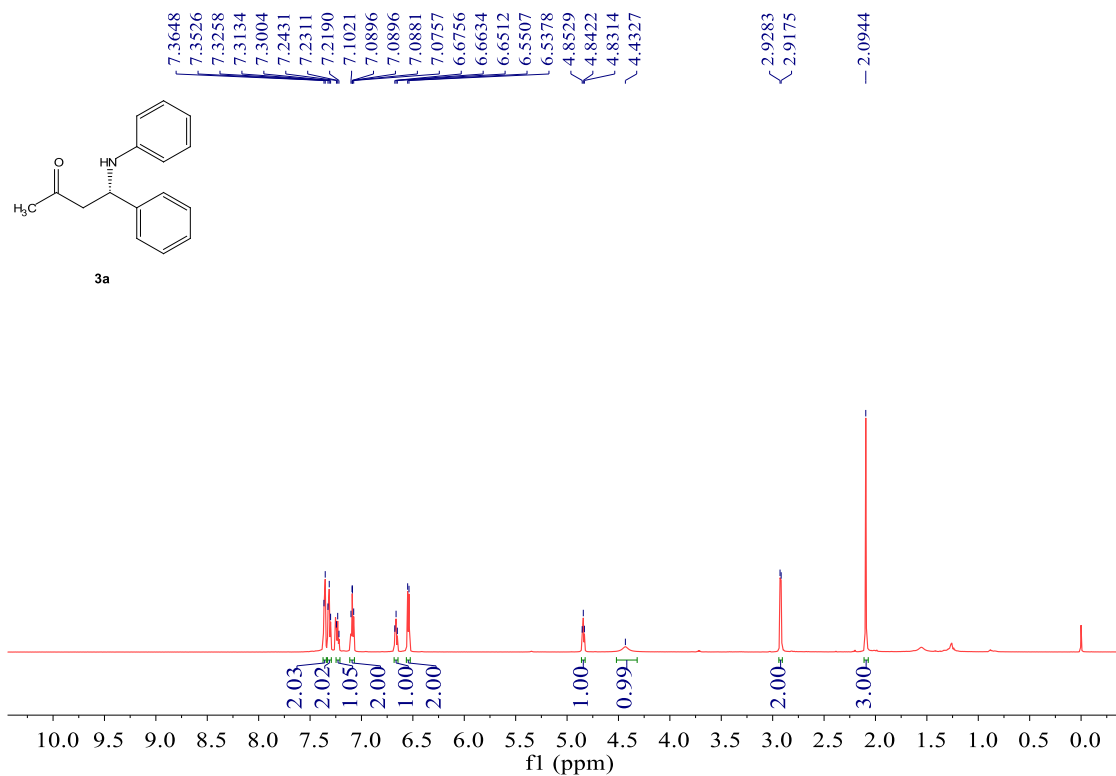

### <sup>13</sup>C NMR Spectrum (151 MHz, CDCl<sub>3</sub>) of 3a

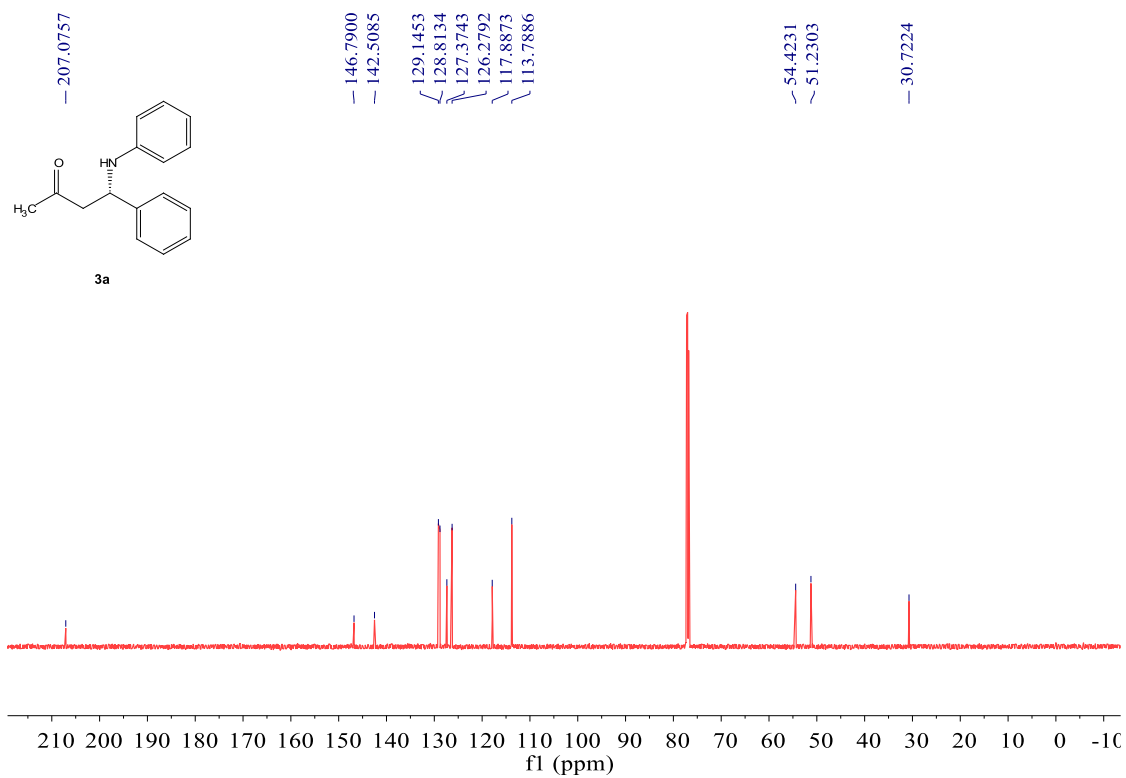

### <sup>1</sup>H NMR Spectrum (600 MHz, CDCl<sub>3</sub>) of 3b

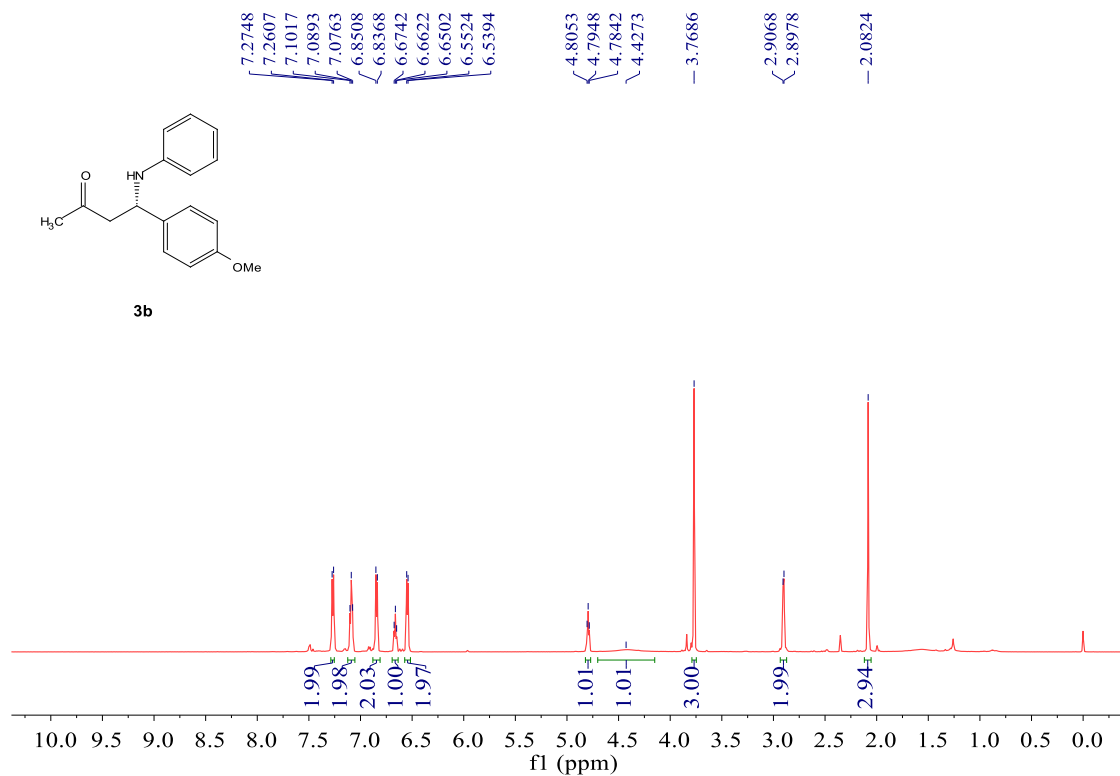

### <sup>13</sup>C NMR Spectrum (151 MHz, CDCl<sub>3</sub>) of 3b

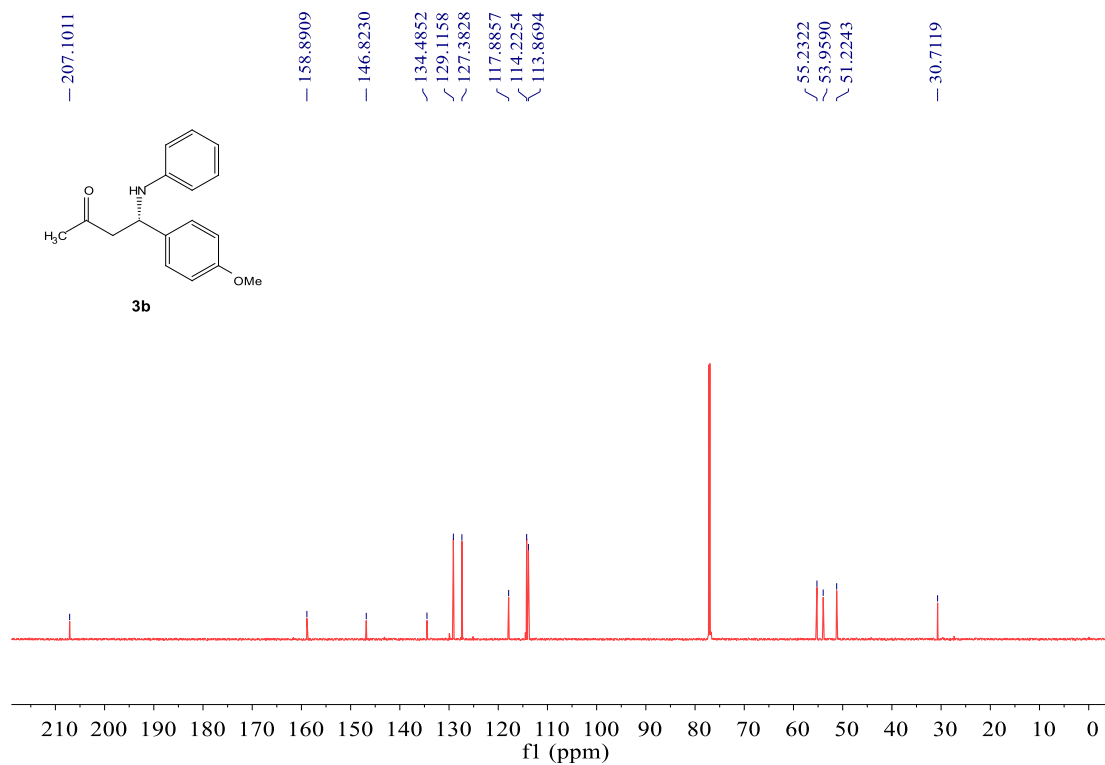

### <sup>1</sup>H NMR Spectrum (600 MHz, CDCl<sub>3</sub>) of 3c

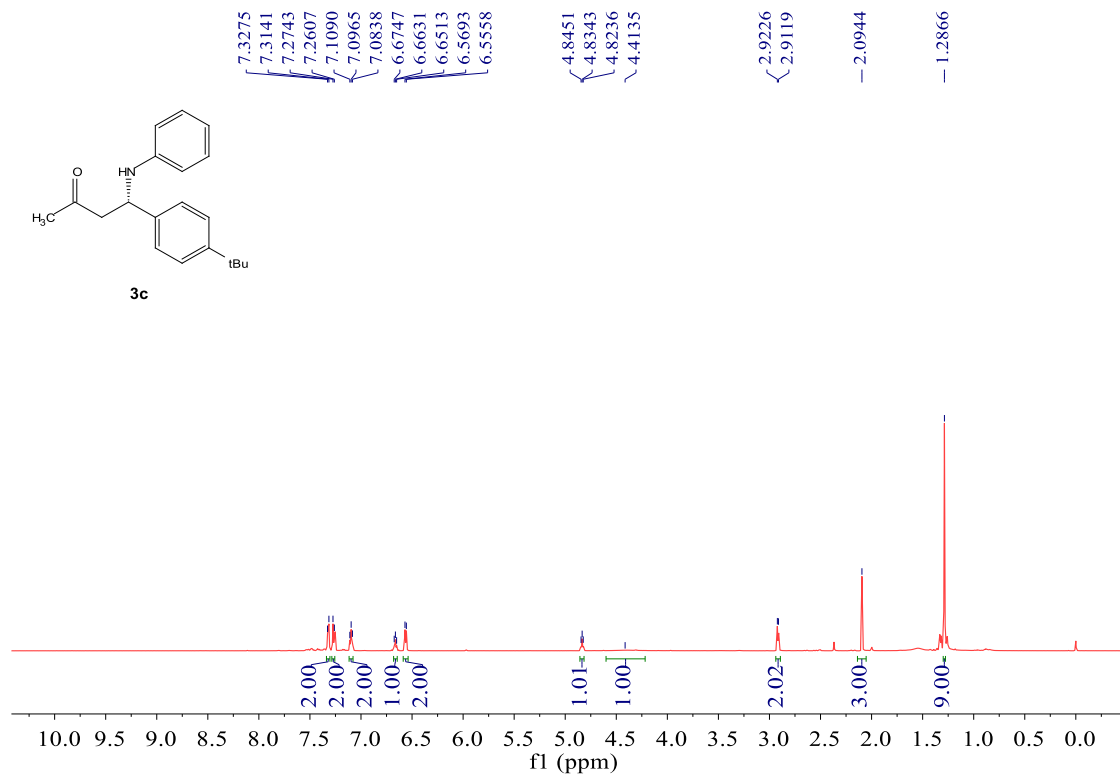

### <sup>13</sup>C NMR Spectrum (151 MHz, CDCl<sub>3</sub>) of 3c

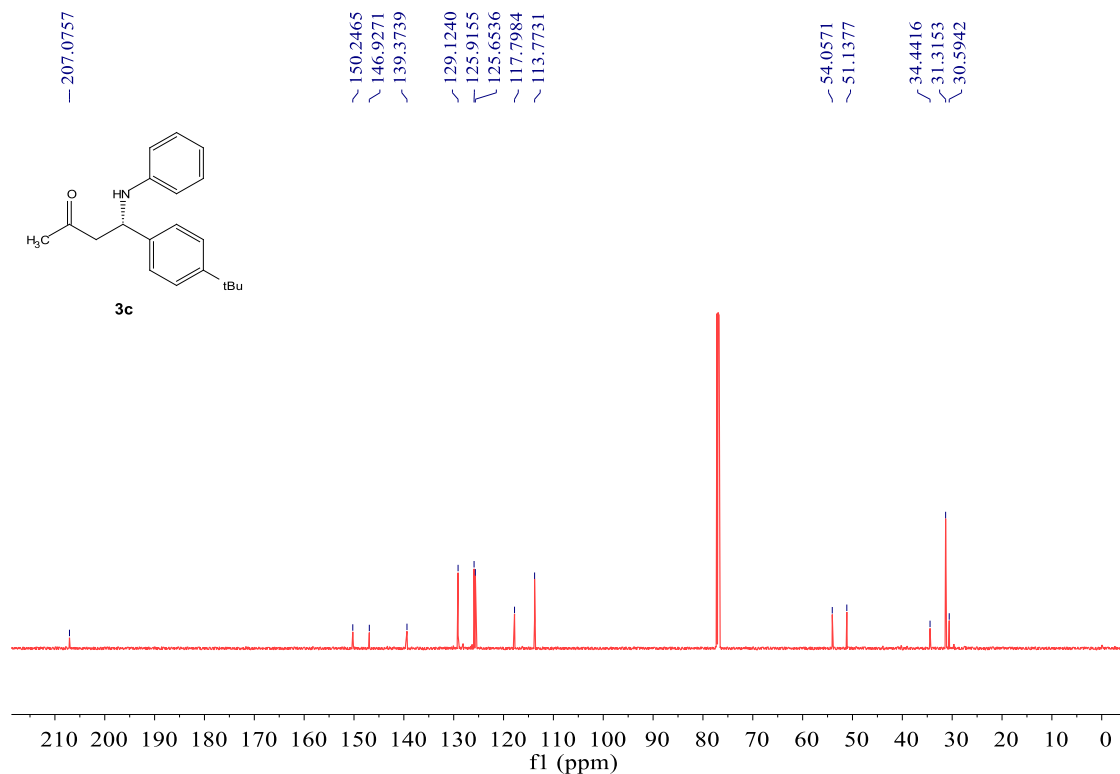

### <sup>1</sup>H NMR Spectrum (600 MHz, CDCl<sub>3</sub>) of 3d

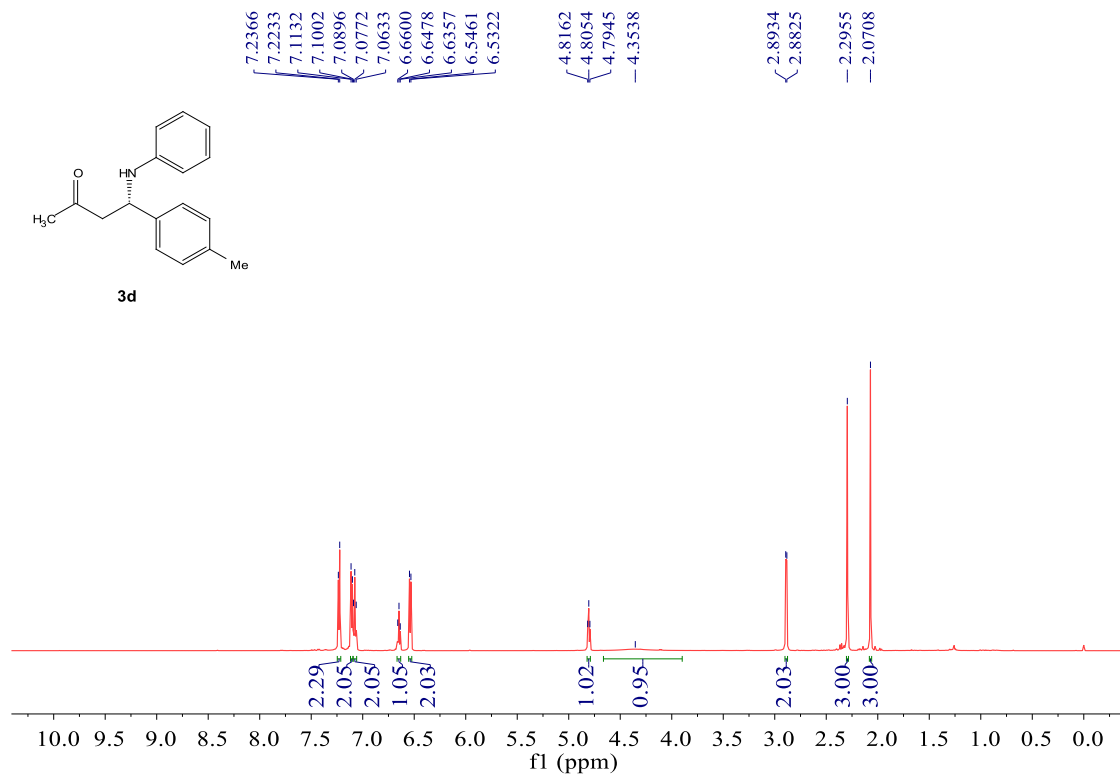

### <sup>13</sup>C NMR Spectrum (151 MHz, CDCl<sub>3</sub>) of 3d

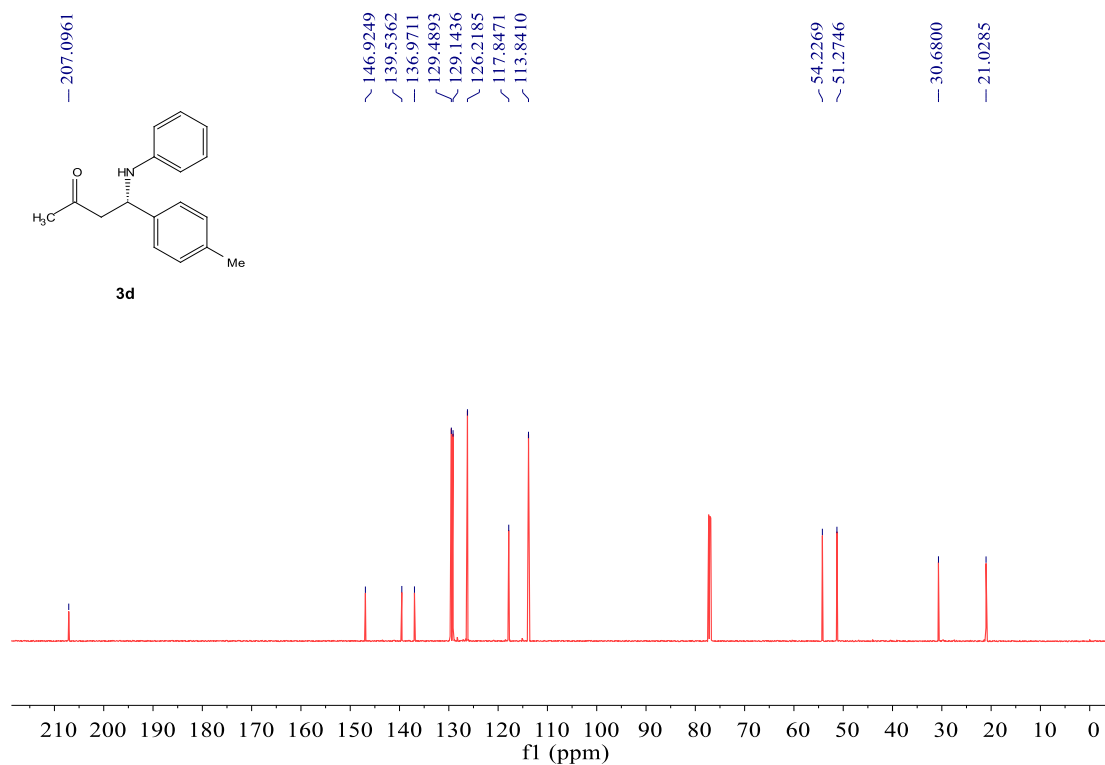



### <sup>1</sup>H NMR Spectrum (600 MHz, CDCl<sub>3</sub>) of 3e

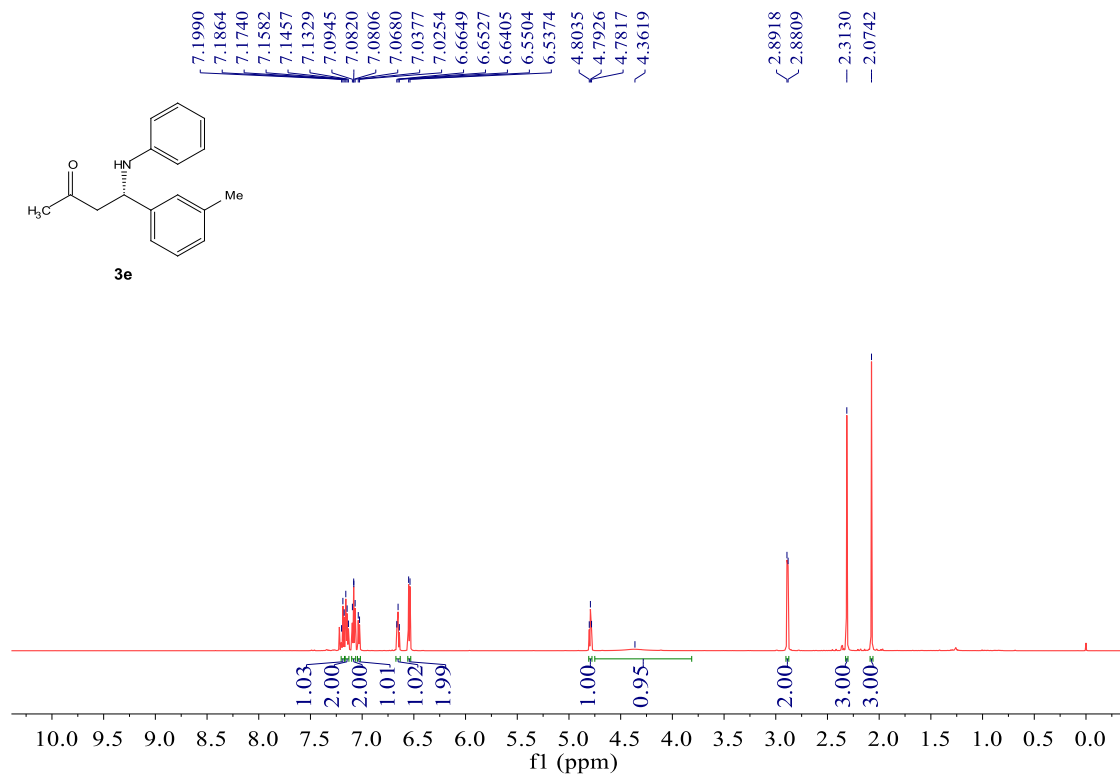

### <sup>13</sup>C NMR Spectrum (151 MHz, CDCl<sub>3</sub>) of 3e

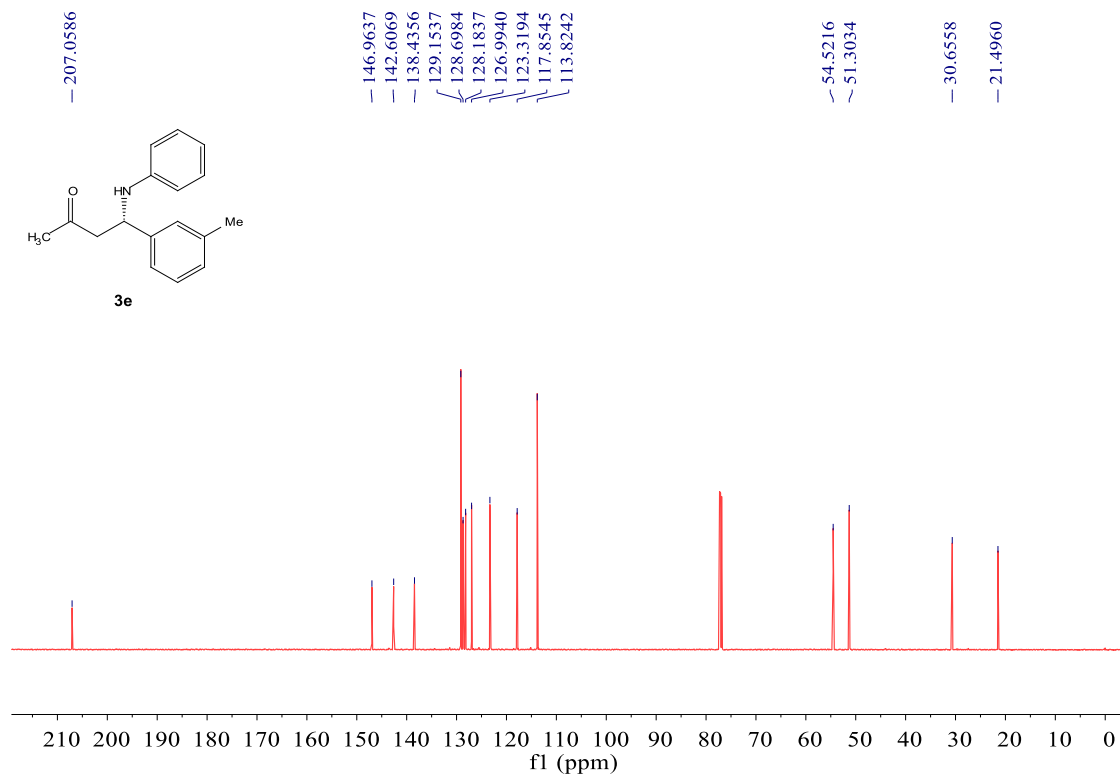

### <sup>1</sup>H NMR Spectrum (600 MHz, CDCl<sub>3</sub>) of 3f

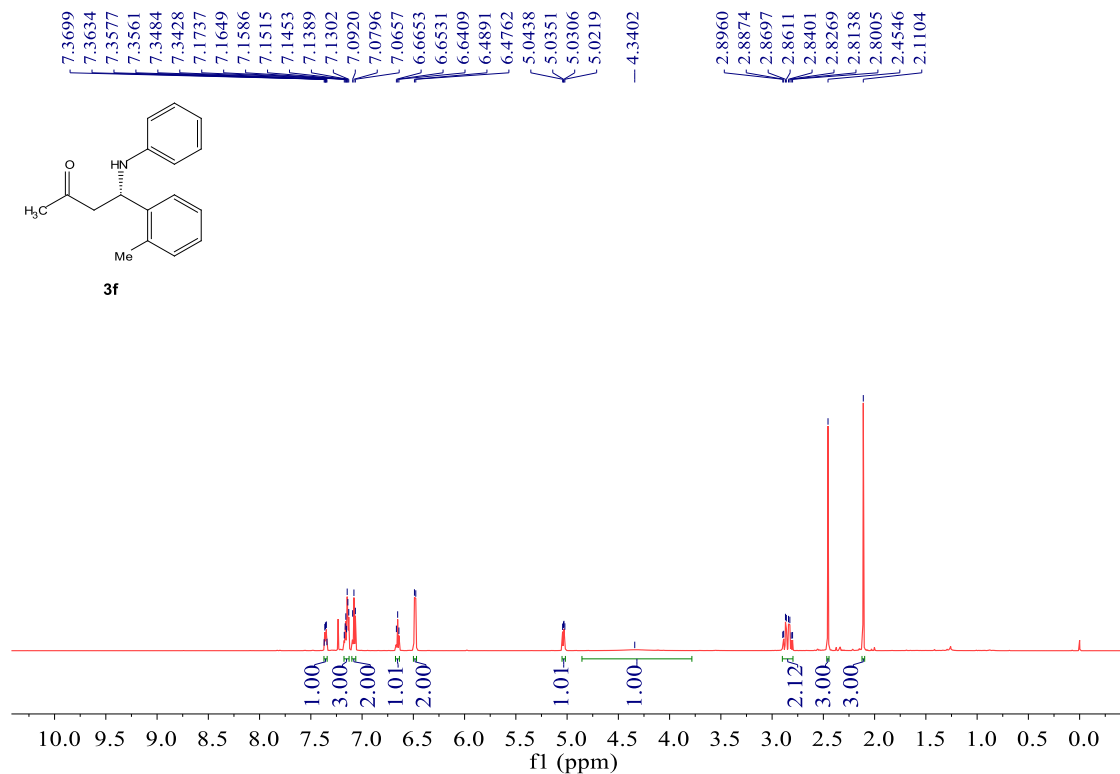

### <sup>13</sup>C NMR Spectrum (151 MHz, CDCl<sub>3</sub>) of 3f

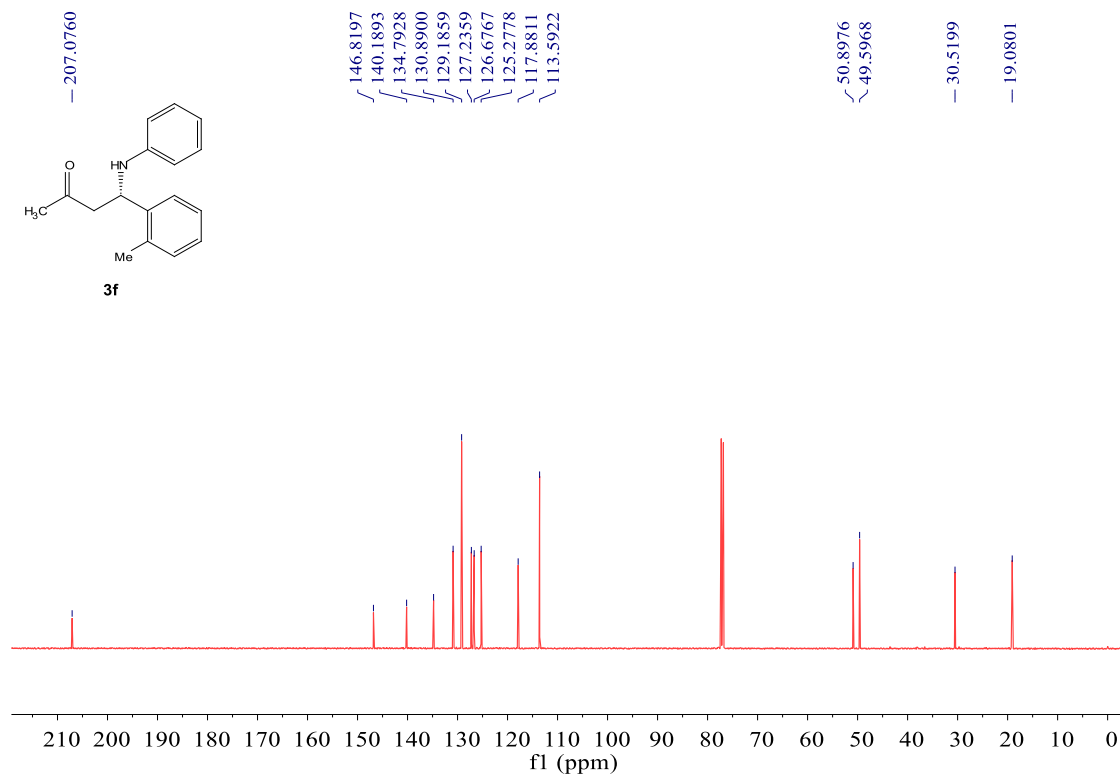

### <sup>1</sup>H NMR Spectrum (600 MHz, CDCl<sub>3</sub>) of 3g

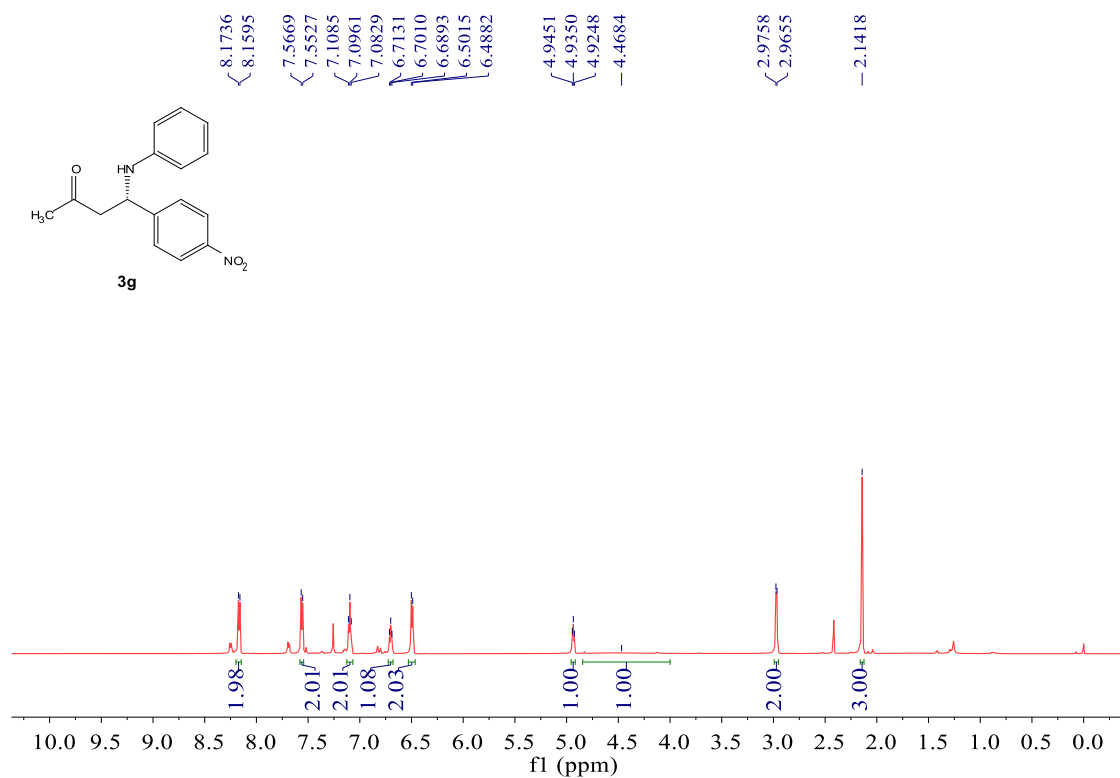

### <sup>13</sup>C NMR Spectrum (151 MHz, CDCl<sub>3</sub>) of 3g

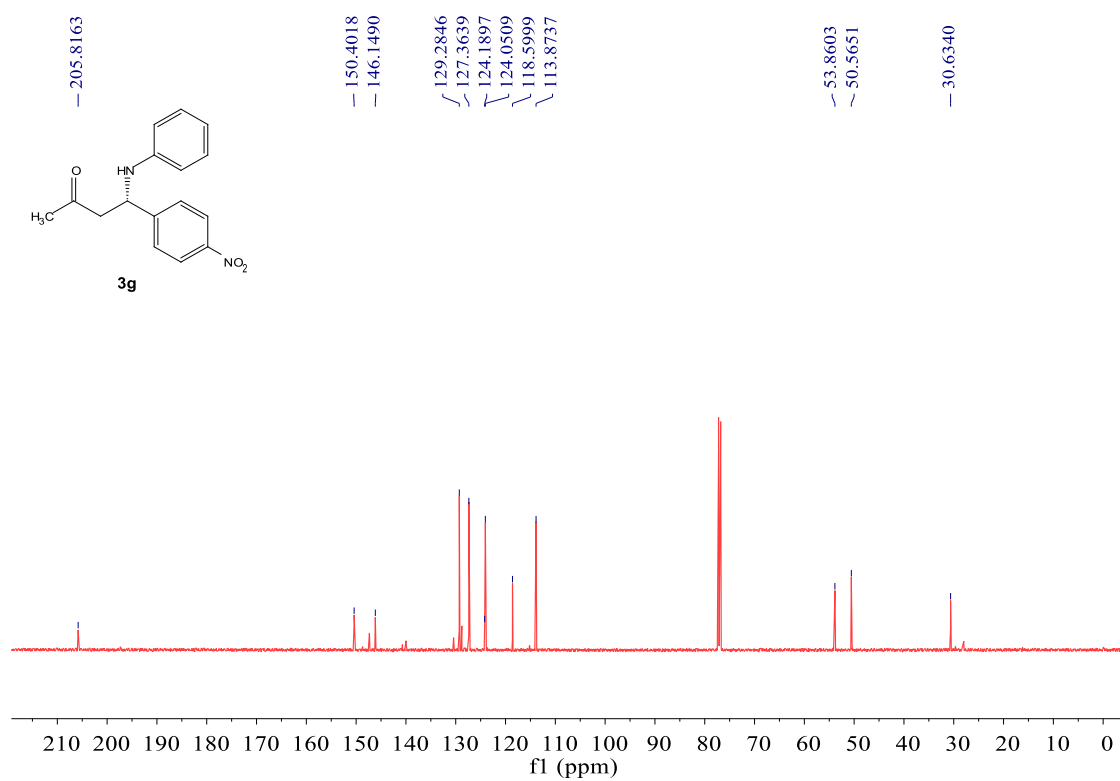

### <sup>1</sup>H NMR Spectrum (400 MHz, CDCl<sub>3</sub>) of 3h

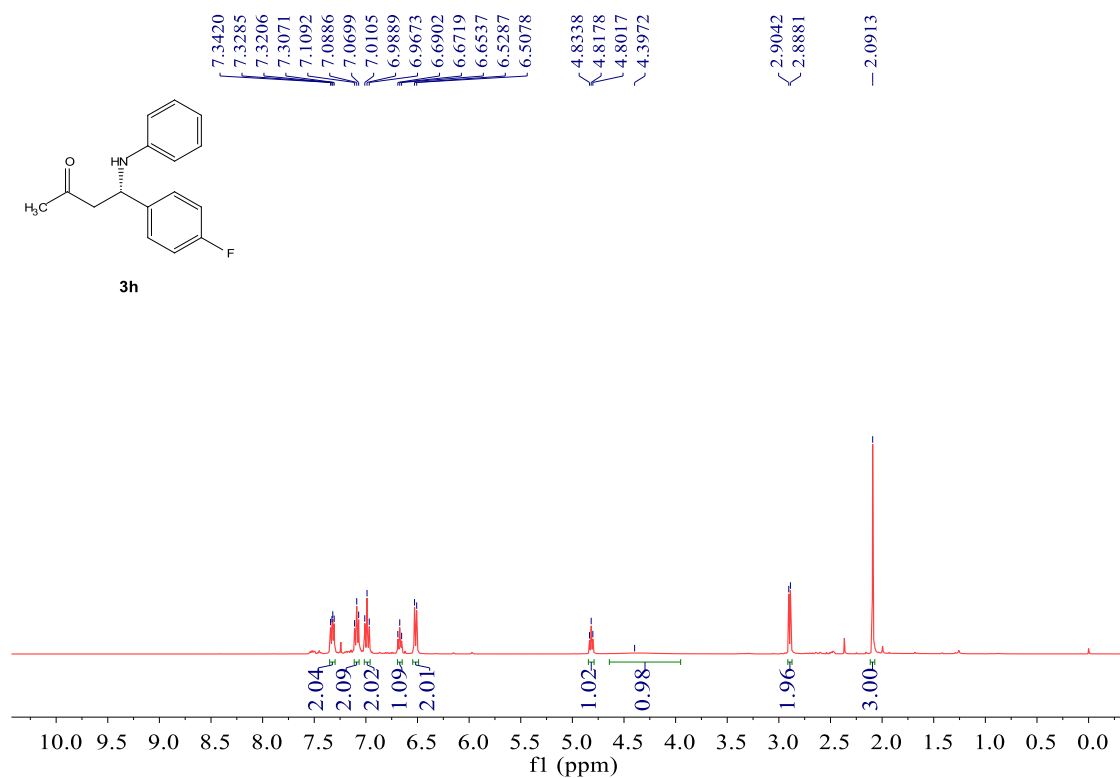

### <sup>13</sup>C NMR Spectrum (101 MHz, CDCl<sub>3</sub>) of 3h

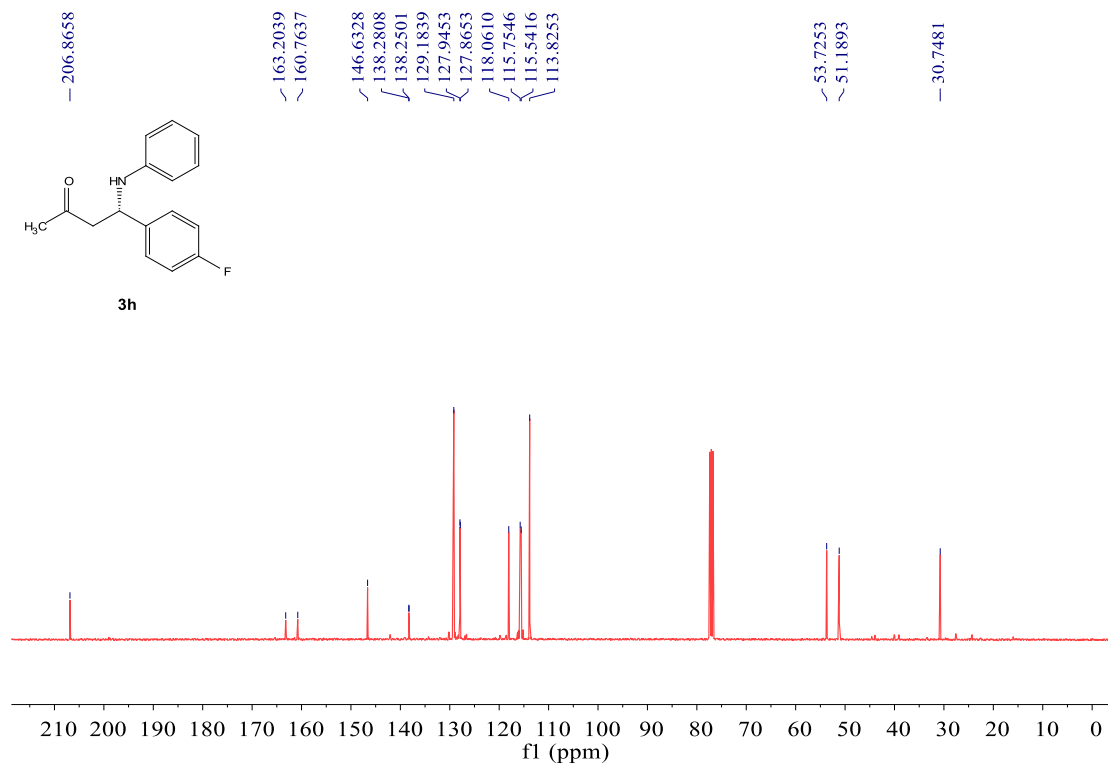

### <sup>1</sup>H NMR Spectrum (600 MHz, CDCl<sub>3</sub>) of 3i

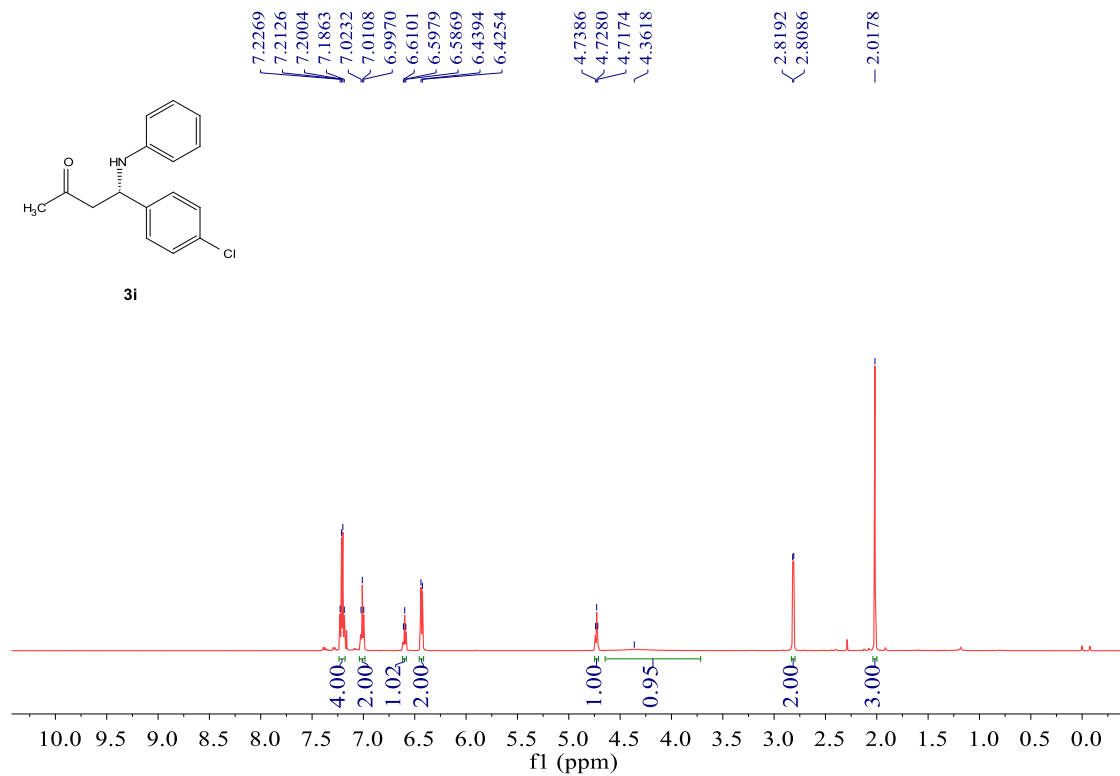

### <sup>13</sup>C NMR Spectrum (151 MHz, CDCl<sub>3</sub>) of 3i

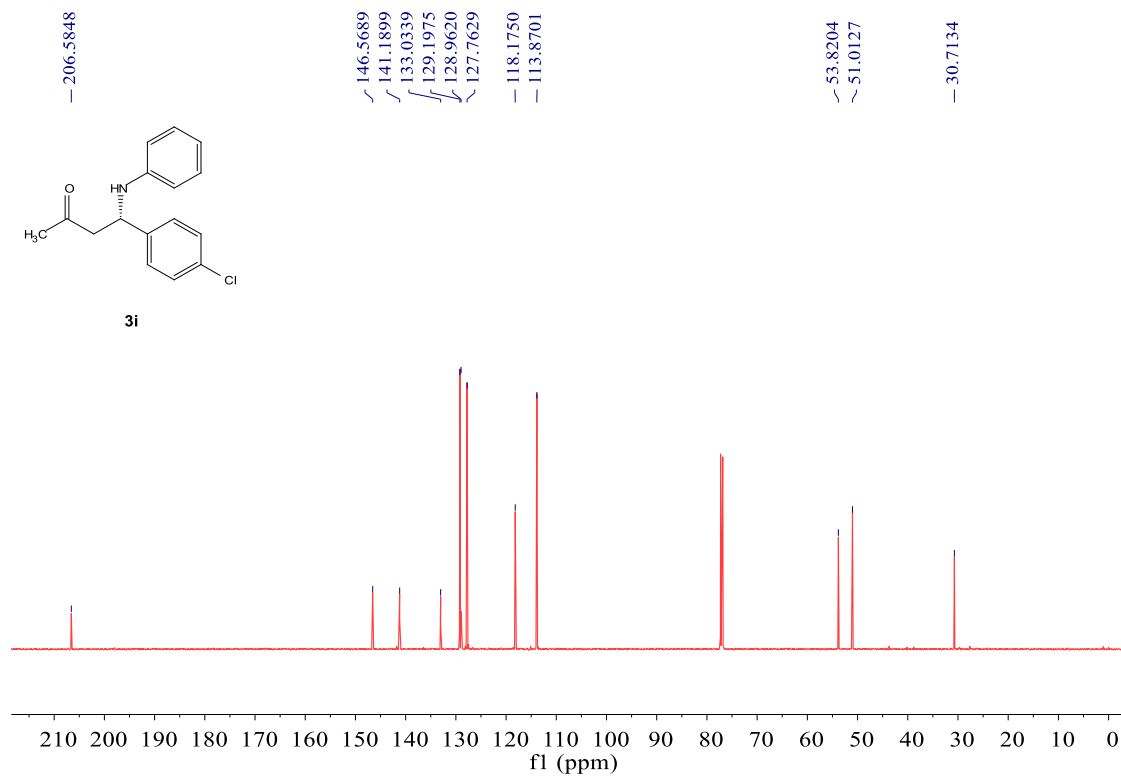

### <sup>1</sup>H NMR Spectrum (600 MHz, CDCl<sub>3</sub>) of 3j

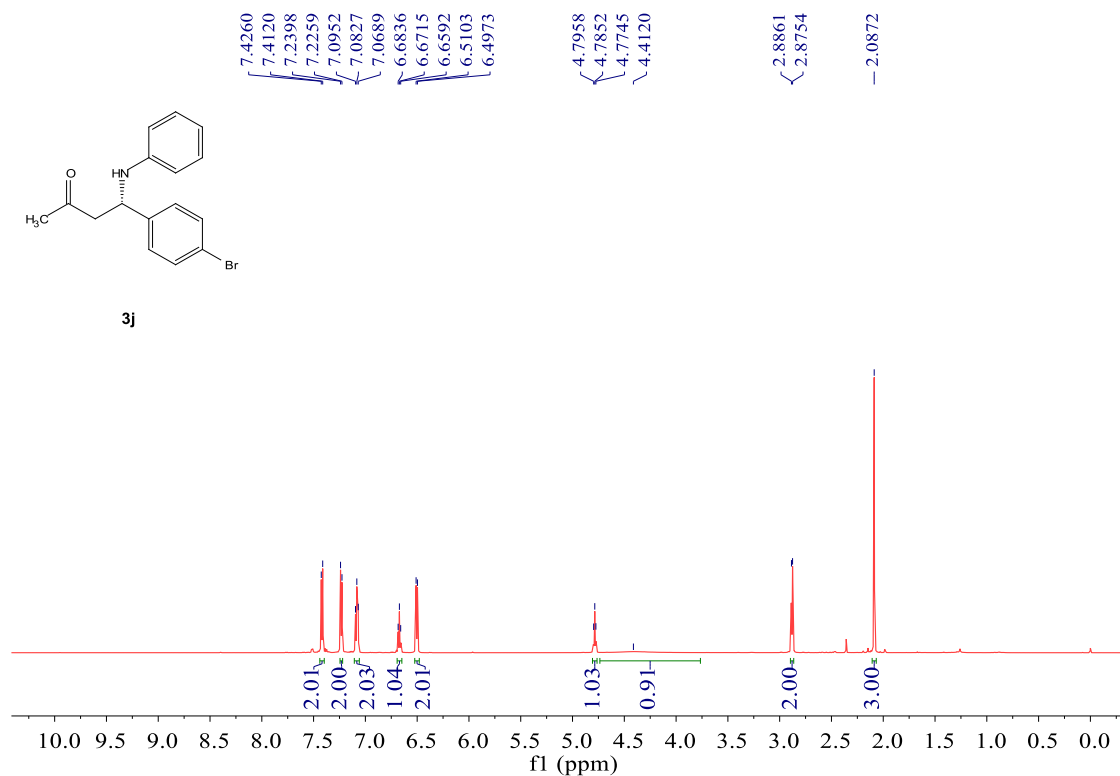

### <sup>13</sup>C NMR Spectrum (151 MHz, CDCl<sub>3</sub>) of 3j

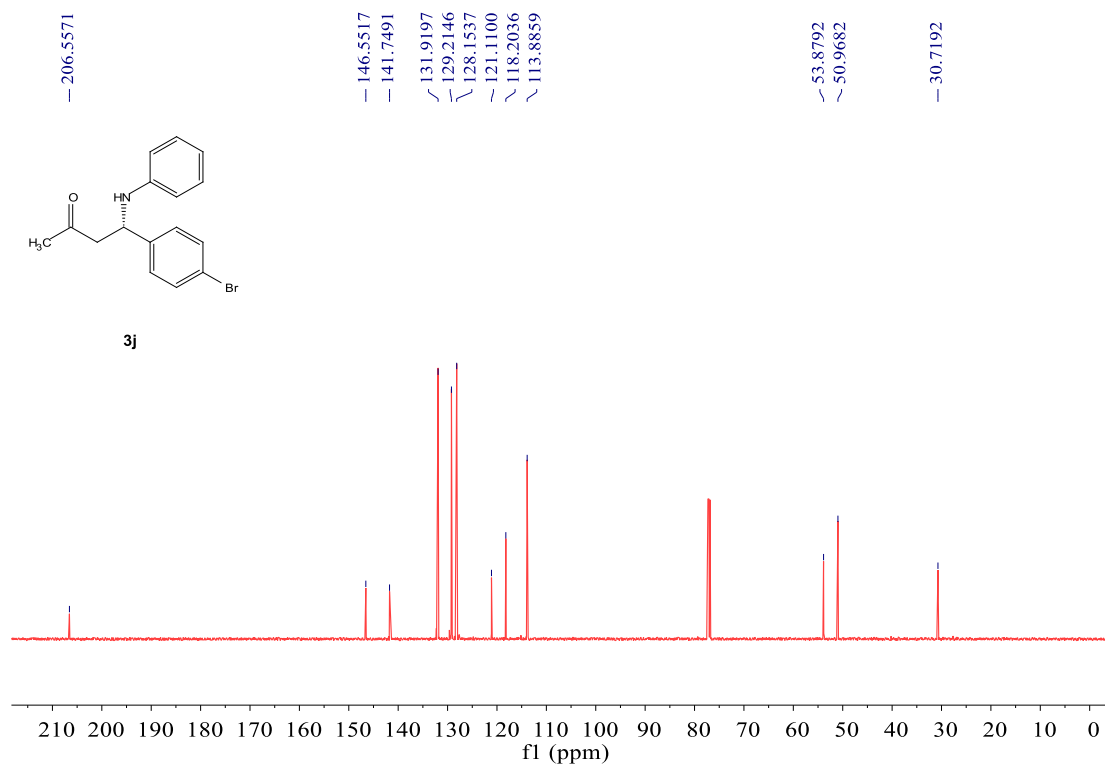

### <sup>1</sup>H NMR Spectrum (400 MHz, CDCl<sub>3</sub>) of 3k

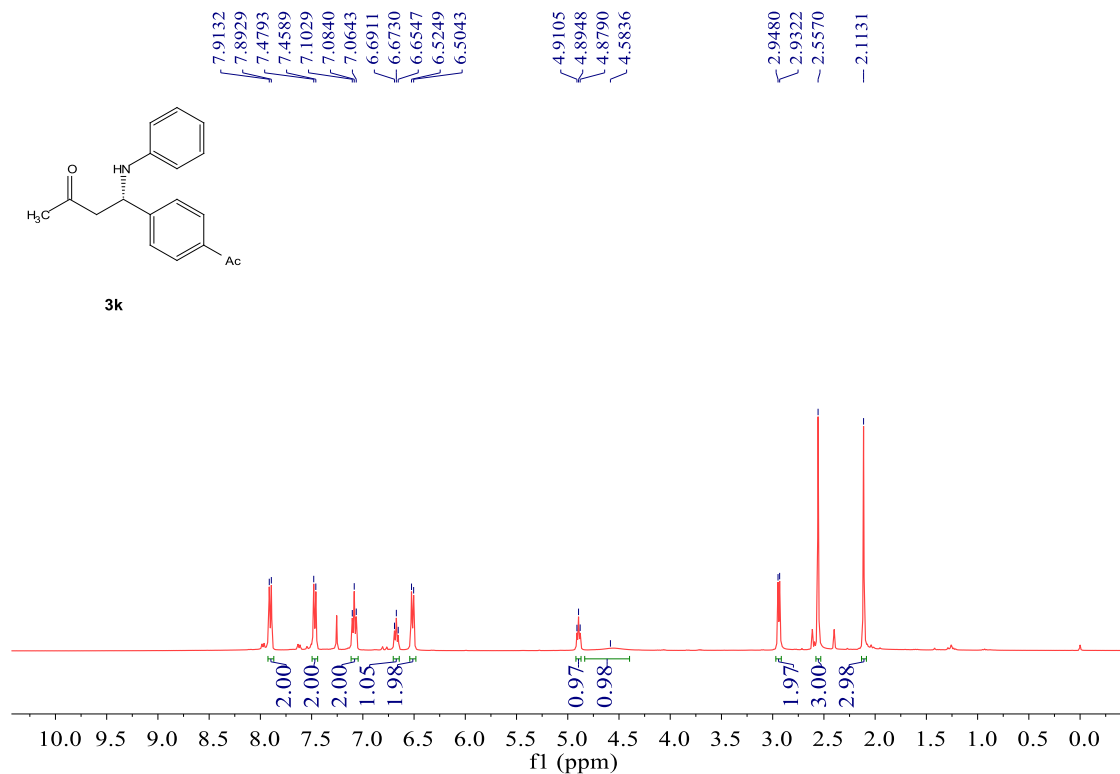

### <sup>13</sup>C NMR Spectrum (101 MHz, CDCl<sub>3</sub>) of 3k

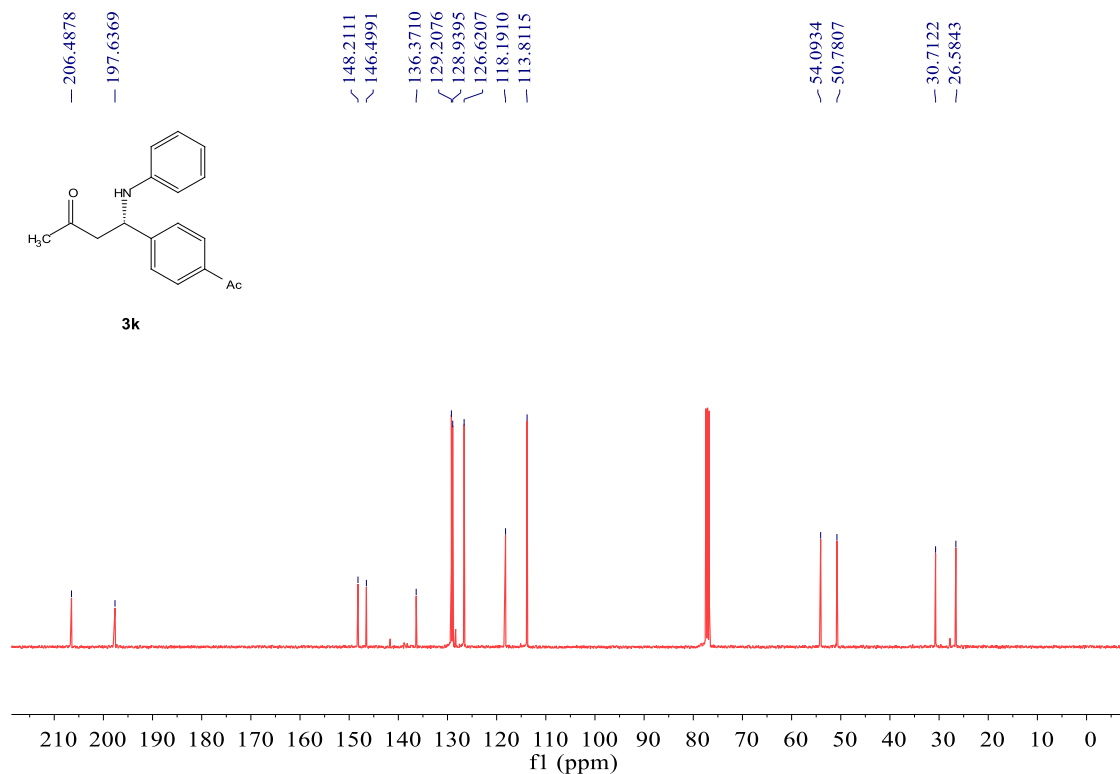

### <sup>1</sup>H NMR Spectrum (600 MHz, CDCl<sub>3</sub>) of 3I

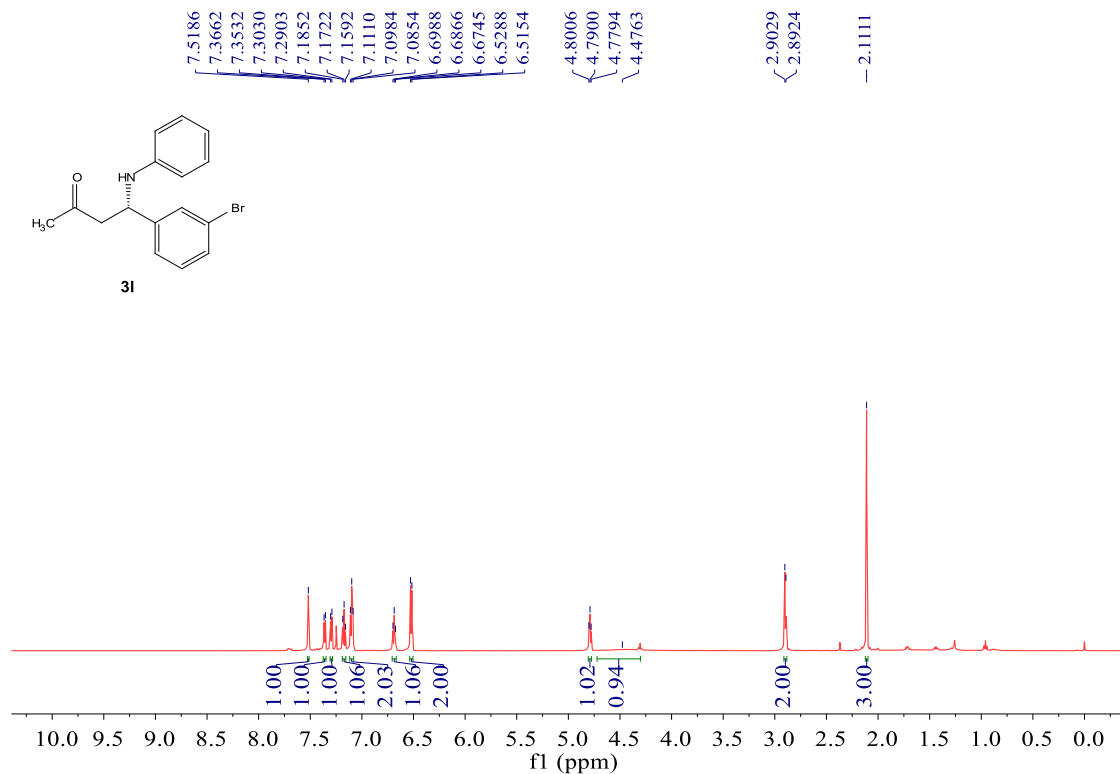

### <sup>13</sup>C NMR Spectrum (151 MHz, CDCl<sub>3</sub>) of 3I

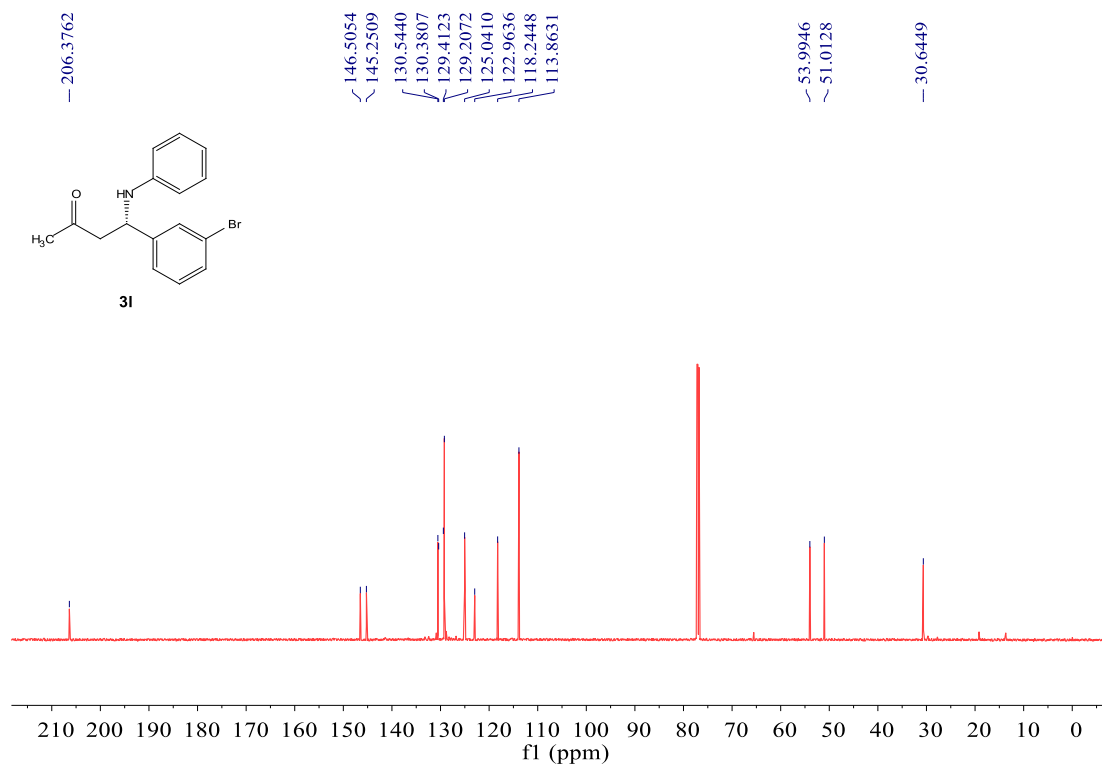



### <sup>1</sup>H NMR Spectrum (600 MHz, CDCl<sub>3</sub>) of 3m

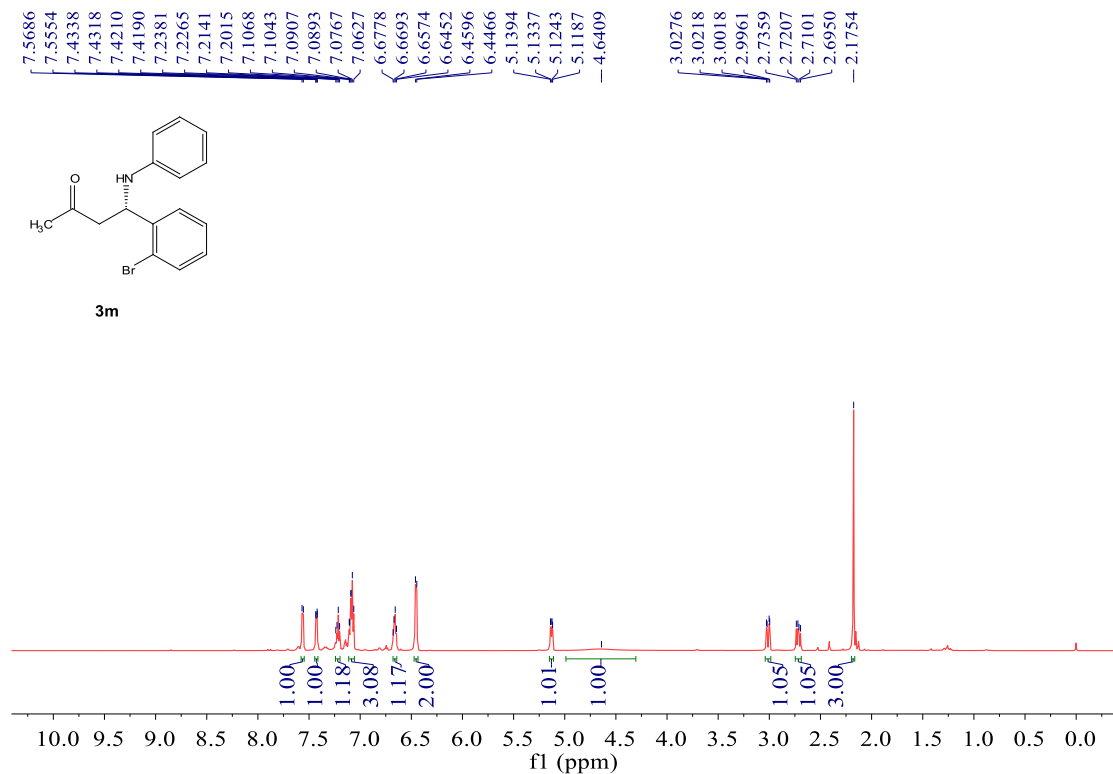

### <sup>13</sup>C NMR Spectrum (151 MHz, CDCl<sub>3</sub>) of 3m

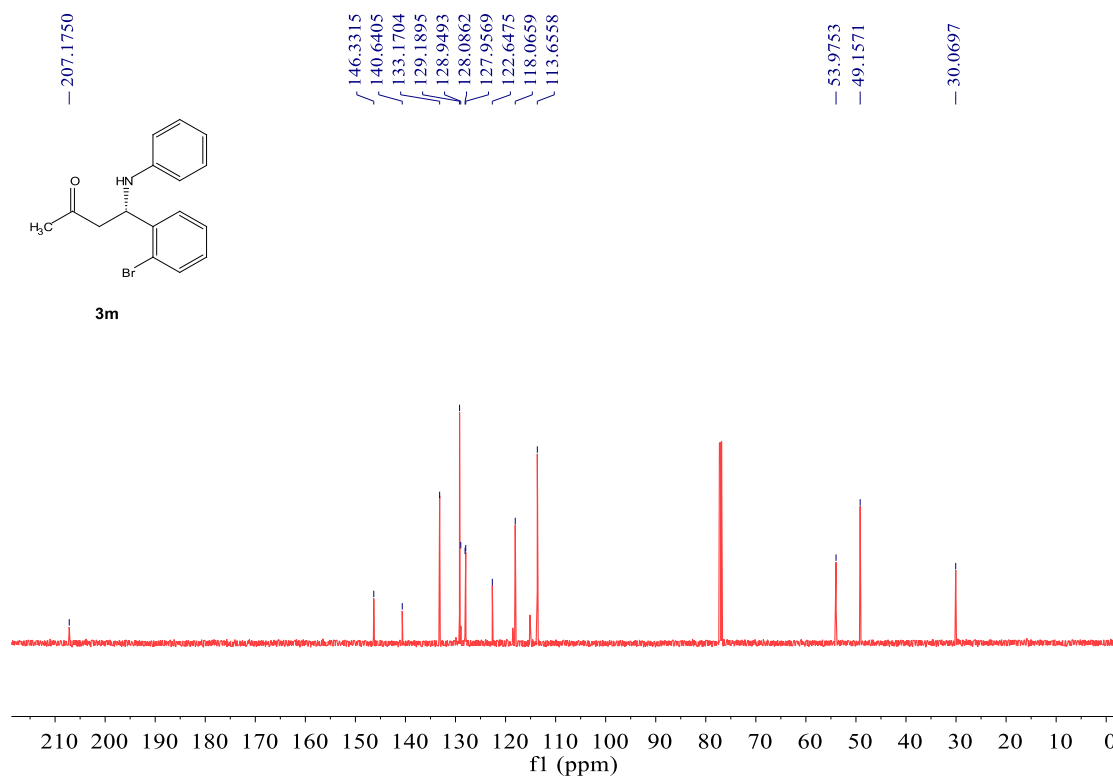

### <sup>1</sup>H NMR Spectrum (400 MHz, CDCl<sub>3</sub>) of 3n

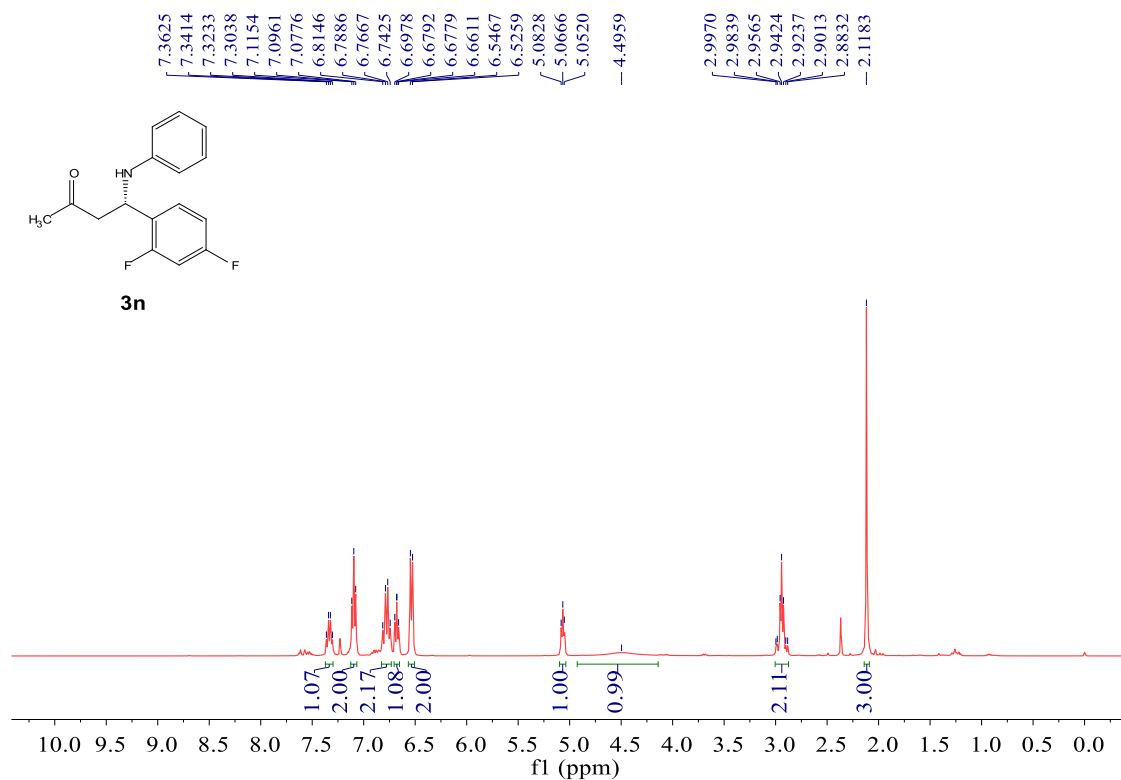

### <sup>13</sup>C NMR Spectrum (101 MHz, CDCl<sub>3</sub>) of 3n

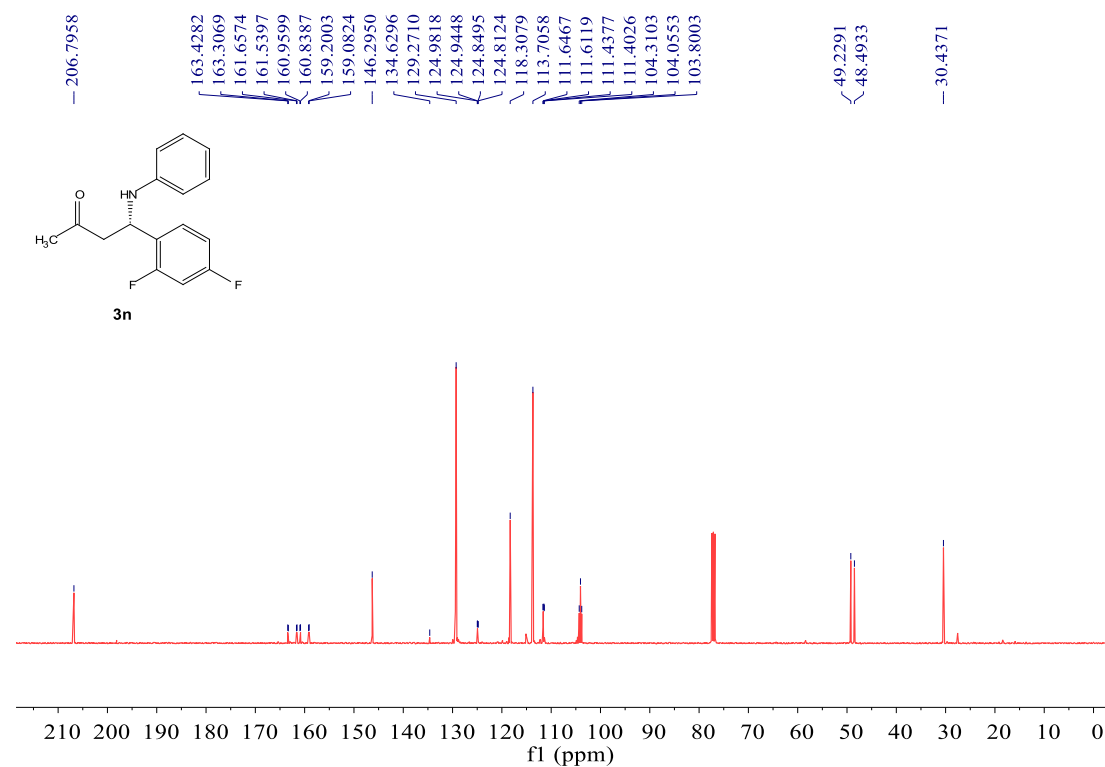

### <sup>19</sup>F NMR Spectrum (565 MHz, CDCl<sub>3</sub>) of 3n

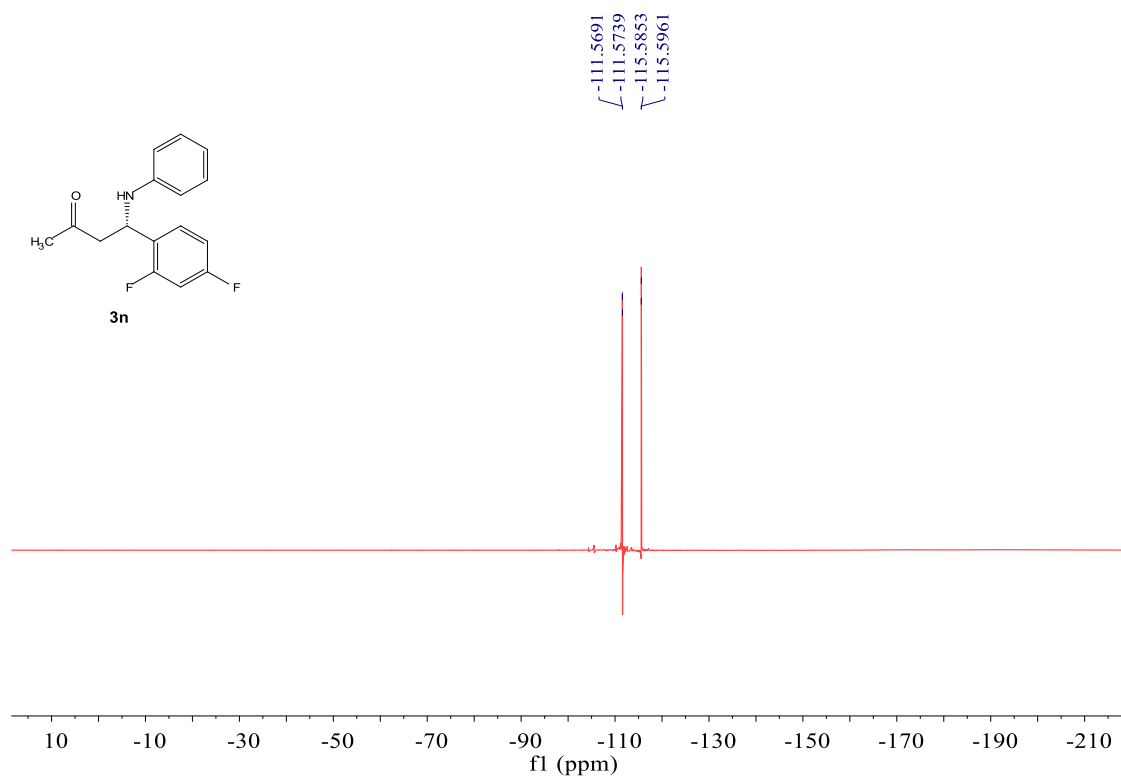

### <sup>1</sup>H NMR Spectrum (600 MHz, CDCl<sub>3</sub>) of 3o

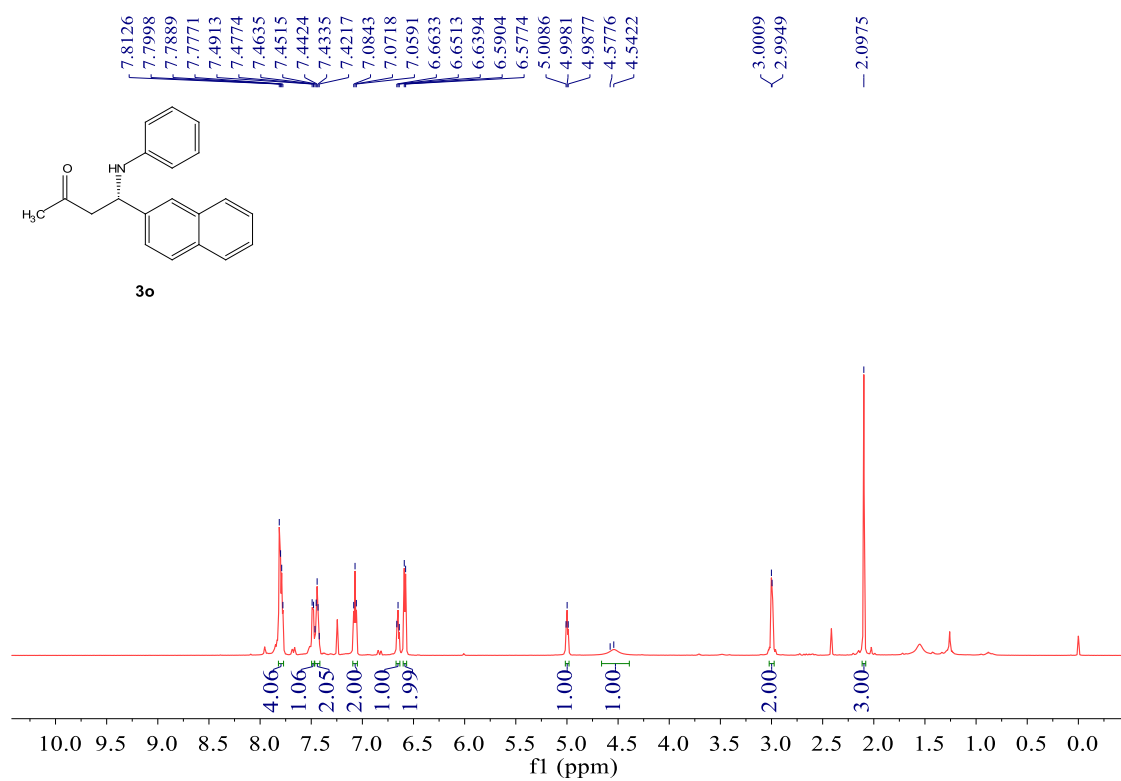

### <sup>13</sup>C NMR Spectrum (151 MHz, CDCl<sub>3</sub>) of 3o

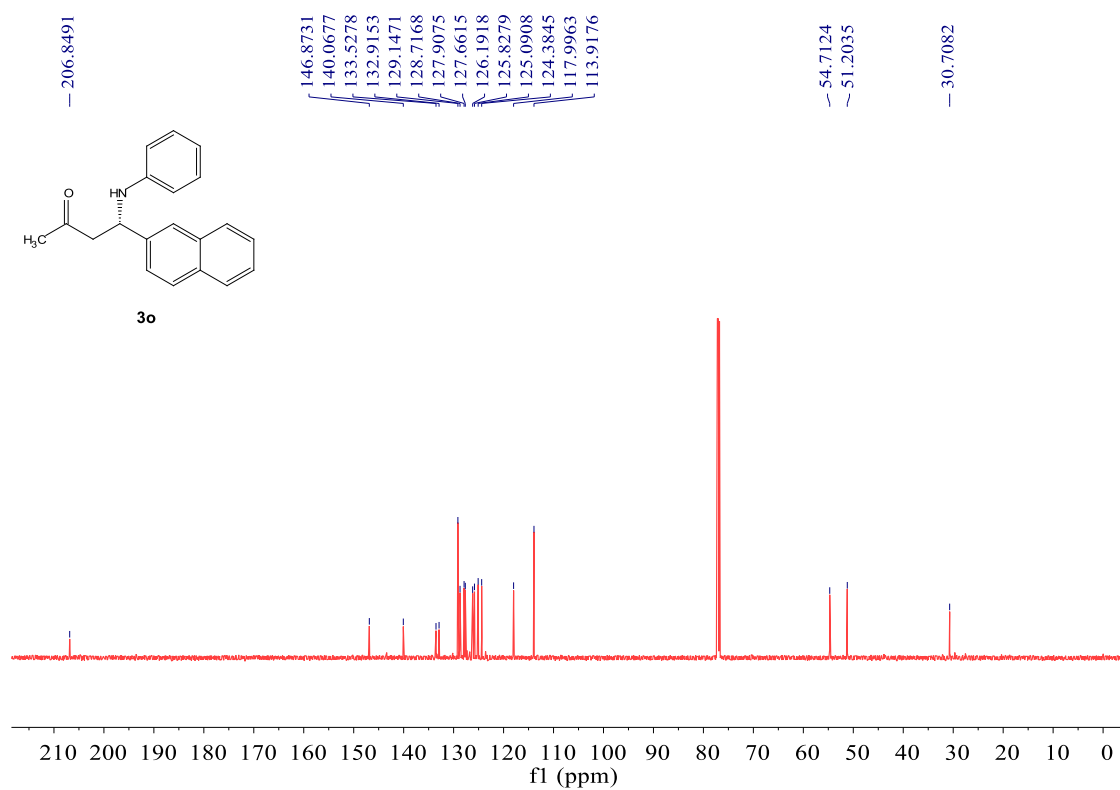

### <sup>1</sup>H NMR Spectrum (400 MHz, CDCl<sub>3</sub>) of 3p

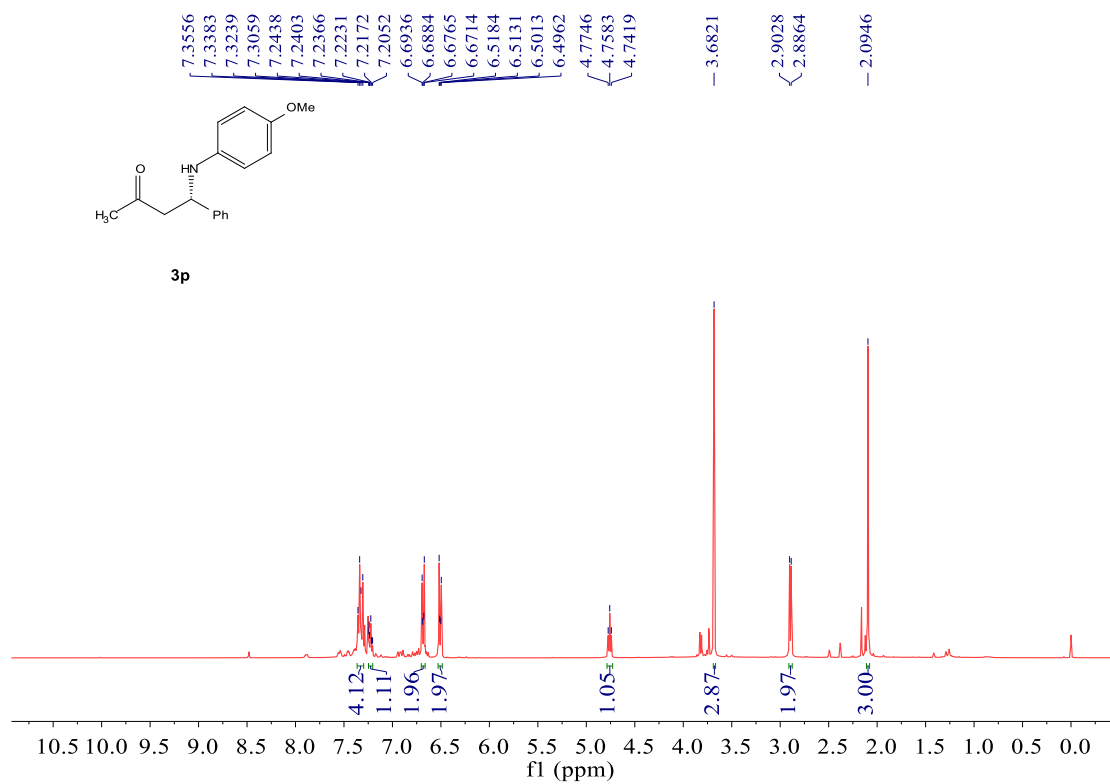

**<sup>13</sup>C NMR Spectrum (101 MHz, CDCl<sub>3</sub>) of 3p**

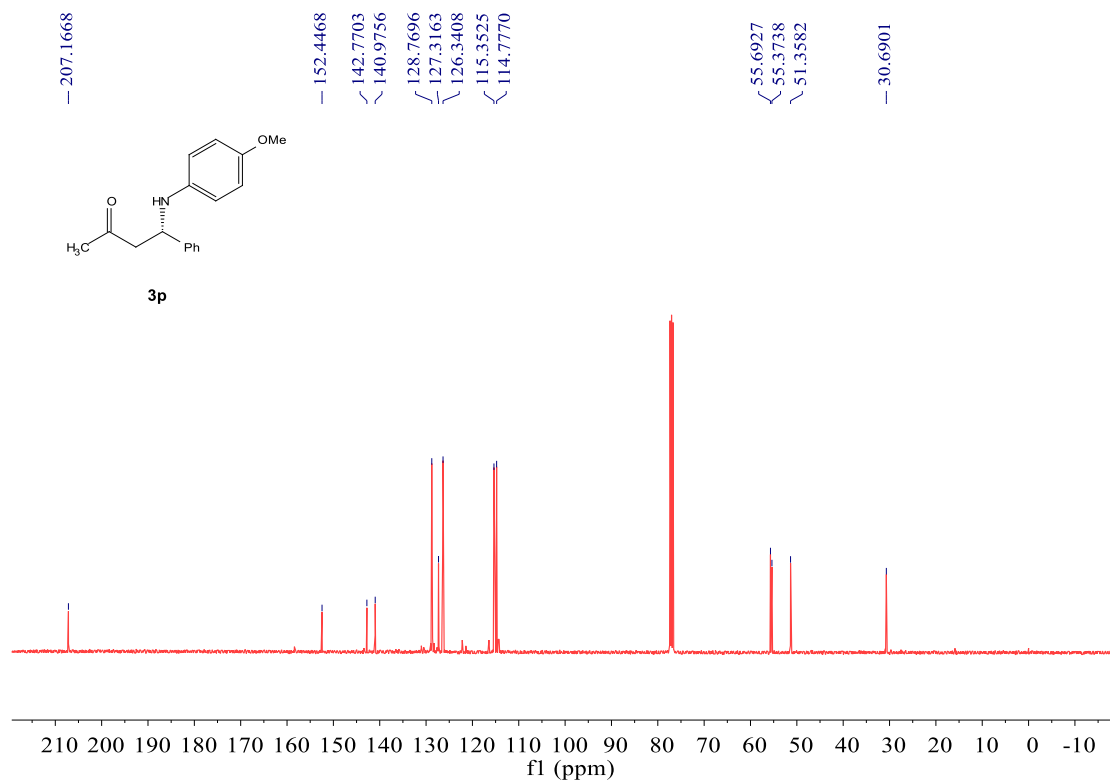

**<sup>1</sup>H NMR Spectrum (600 MHz, CDCl<sub>3</sub>) of 3q**

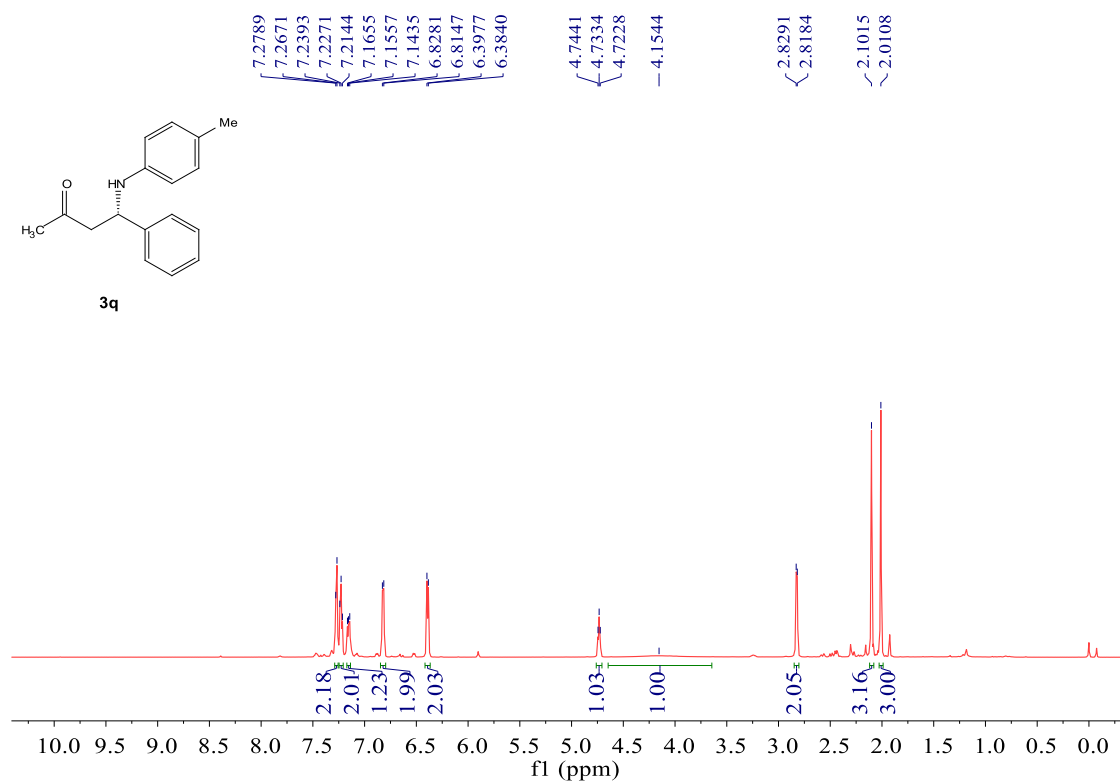

### <sup>13</sup>C NMR Spectrum (151 MHz, CDCl<sub>3</sub>) of 3q

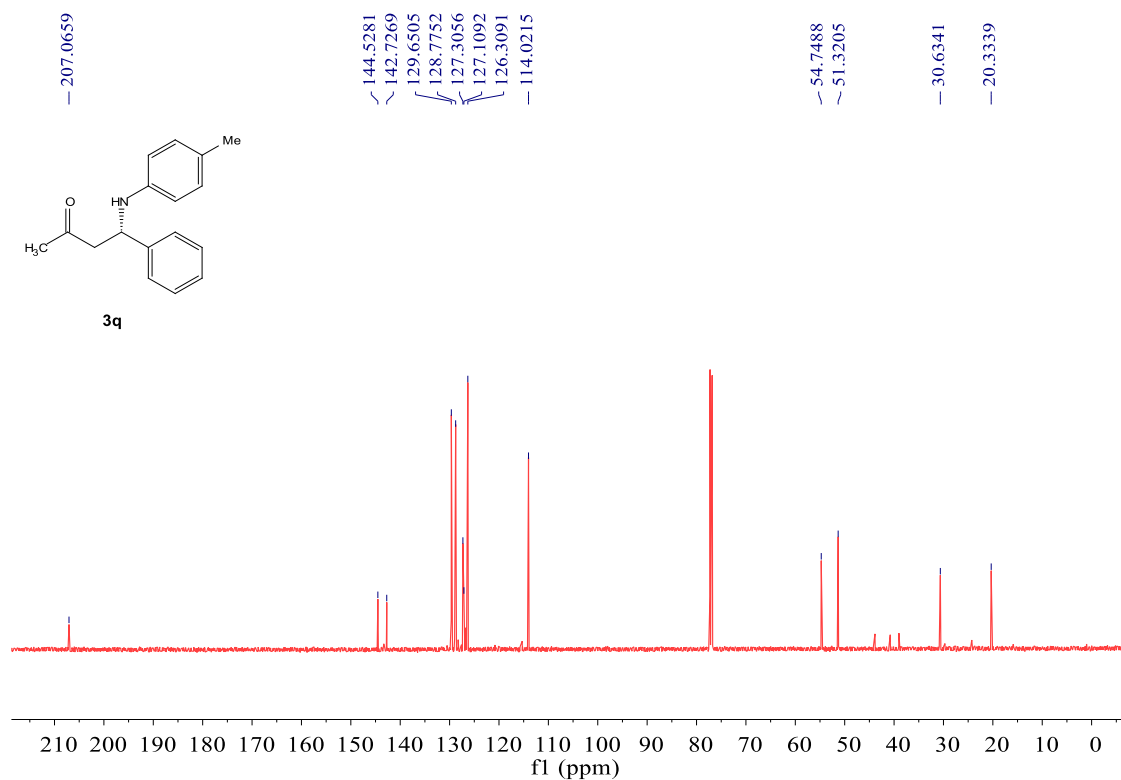

### <sup>1</sup>H NMR Spectrum (400 MHz, CDCl<sub>3</sub>) of 3r

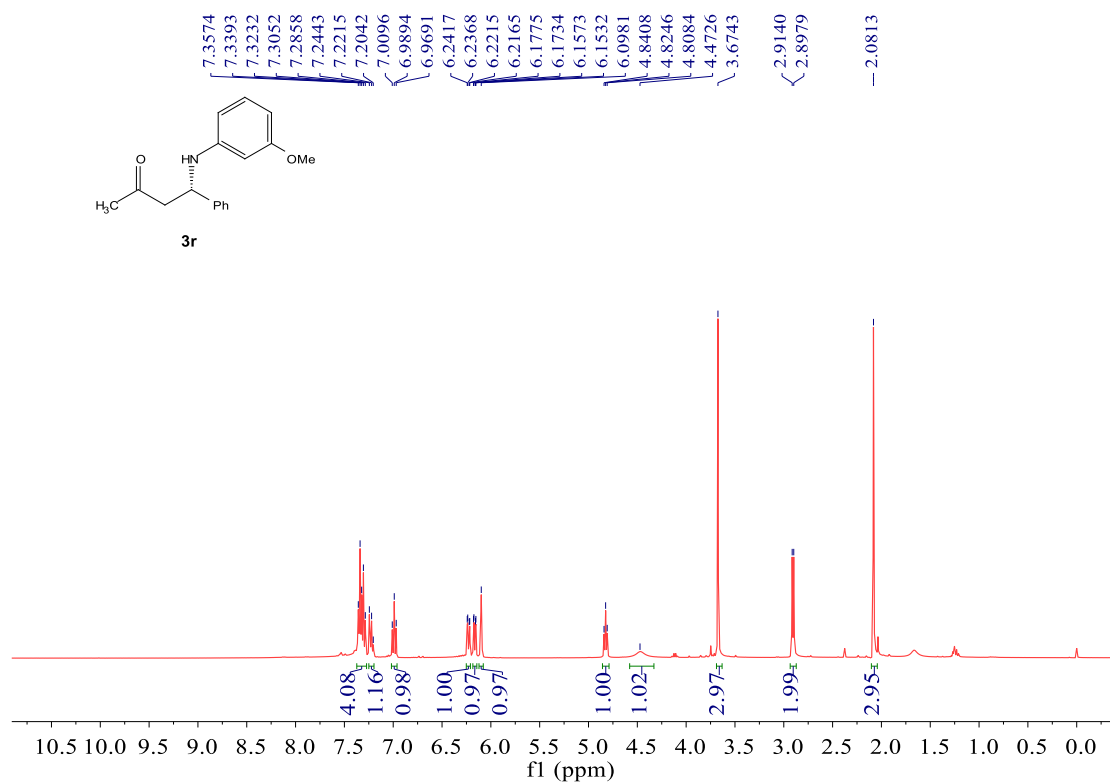

**$^{13}\text{C}$  NMR Spectrum (101 MHz,  $\text{CDCl}_3$ ) of **3r****

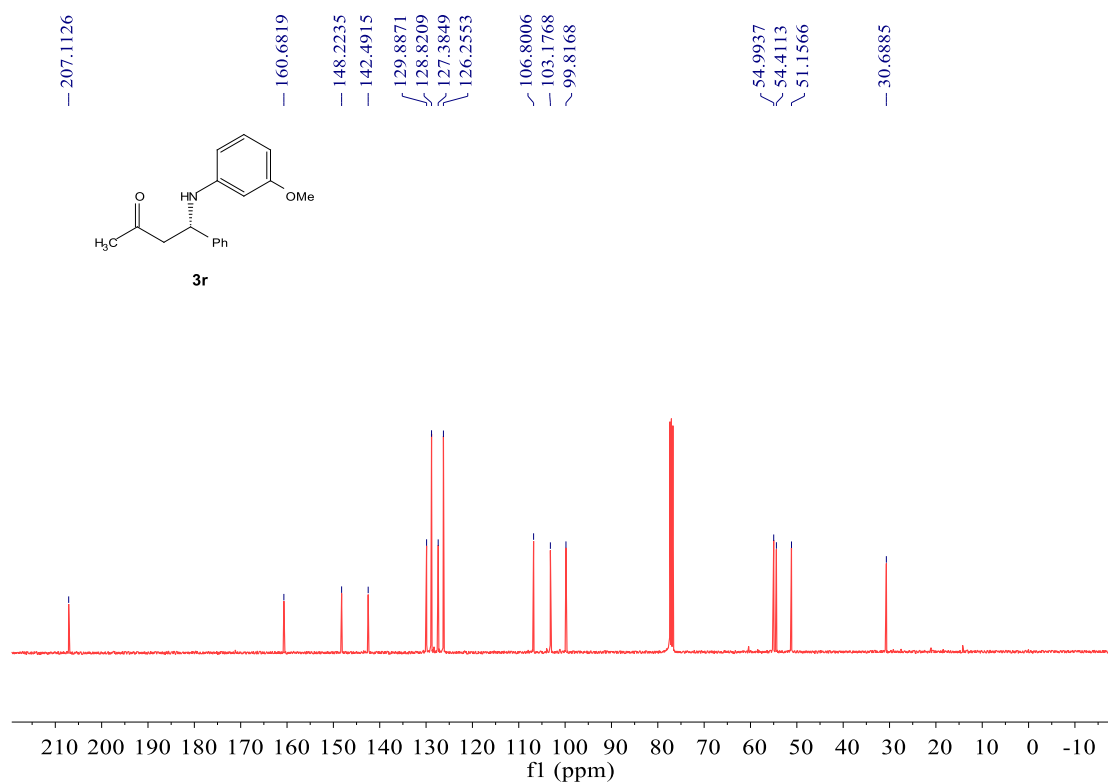

**$^1\text{H}$  NMR Spectrum (400 MHz,  $\text{CDCl}_3$ ) of **3s****

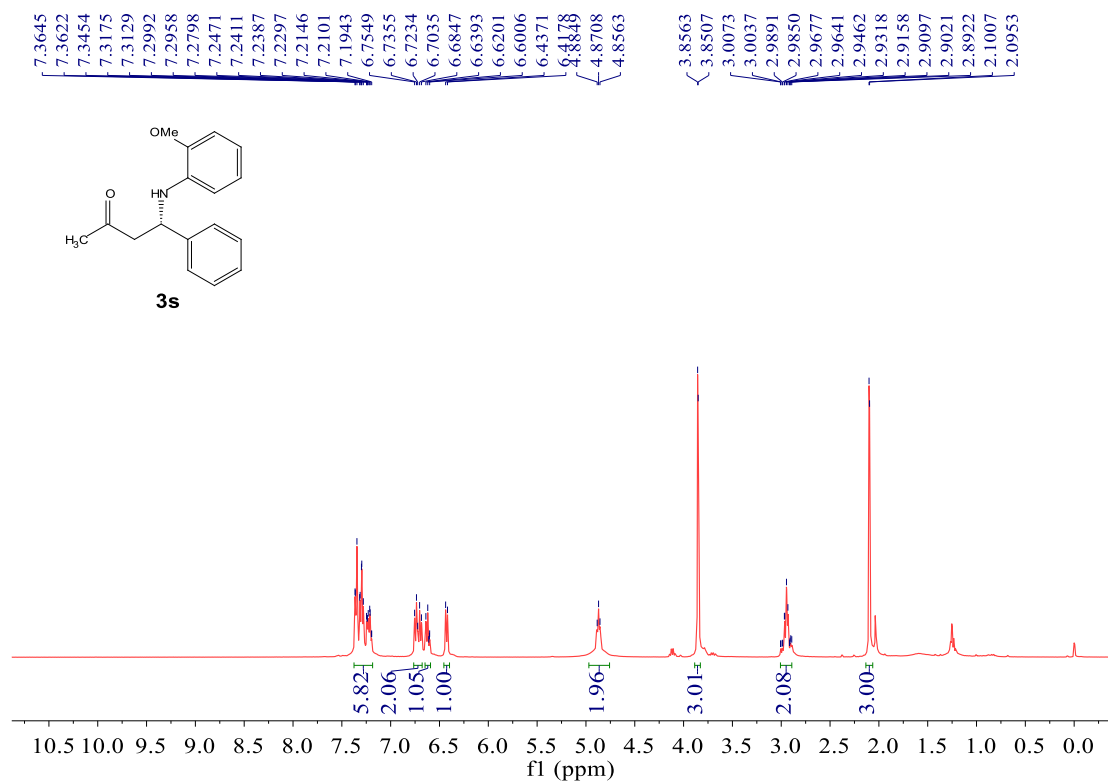

### <sup>13</sup>C NMR Spectrum (101 MHz, CDCl<sub>3</sub>) of 3s

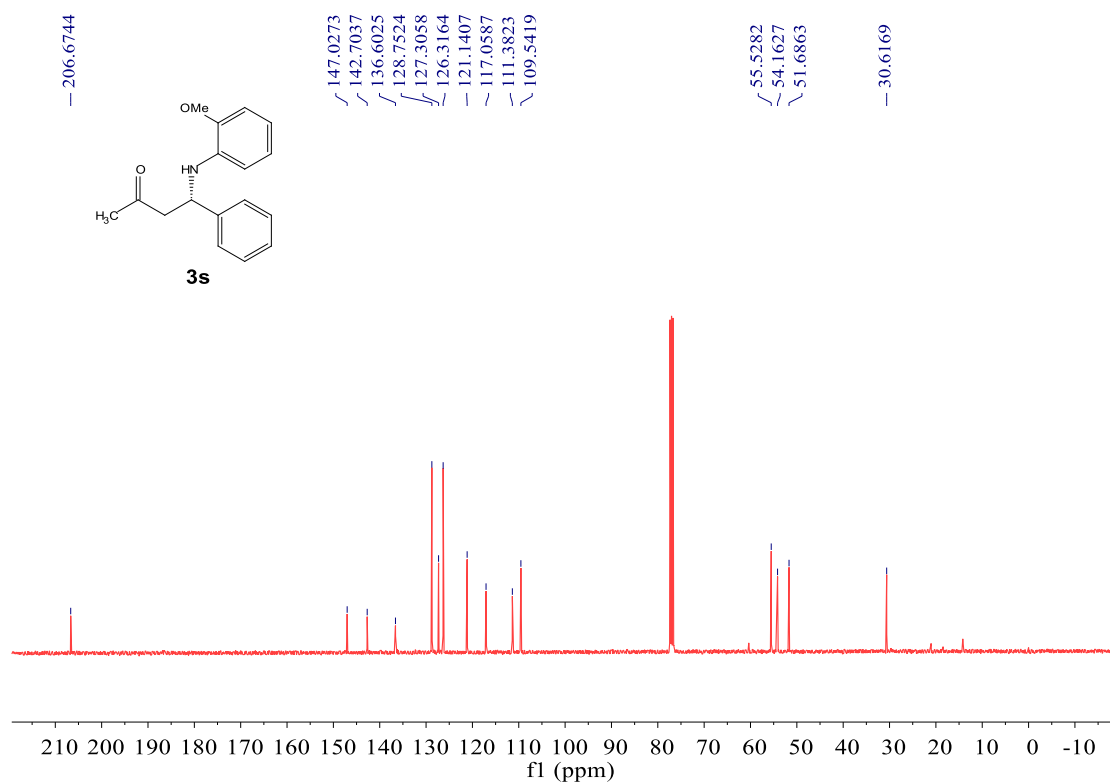

### <sup>1</sup>H NMR Spectrum (400 MHz, CDCl<sub>3</sub>) of 3t

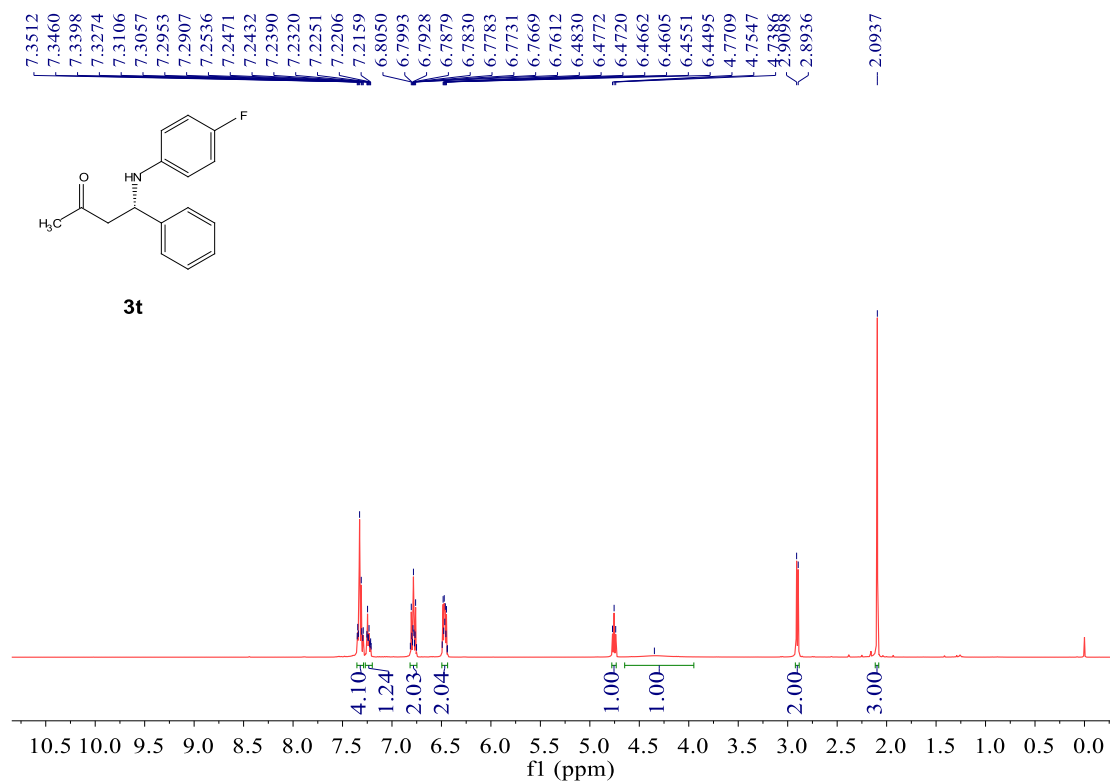



### <sup>13</sup>C NMR Spectrum (101 MHz, CDCl<sub>3</sub>) of 3t

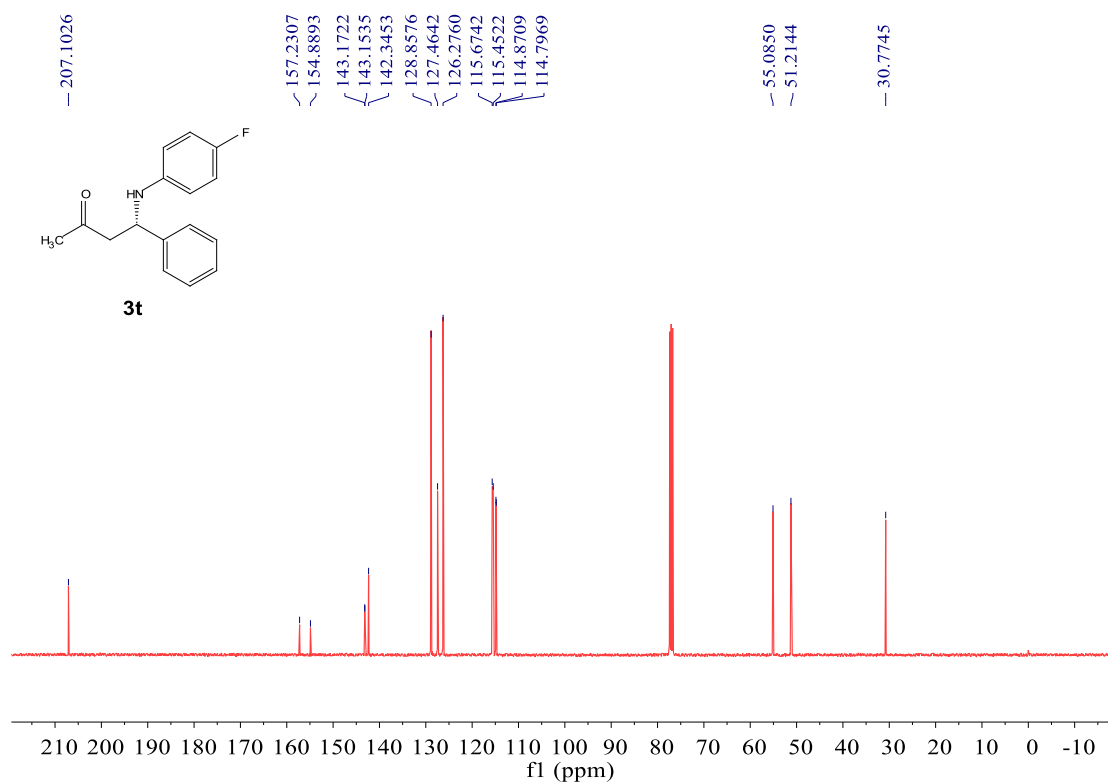

### <sup>19</sup>F NMR Spectrum (376 MHz, CDCl<sub>3</sub>) of 3t

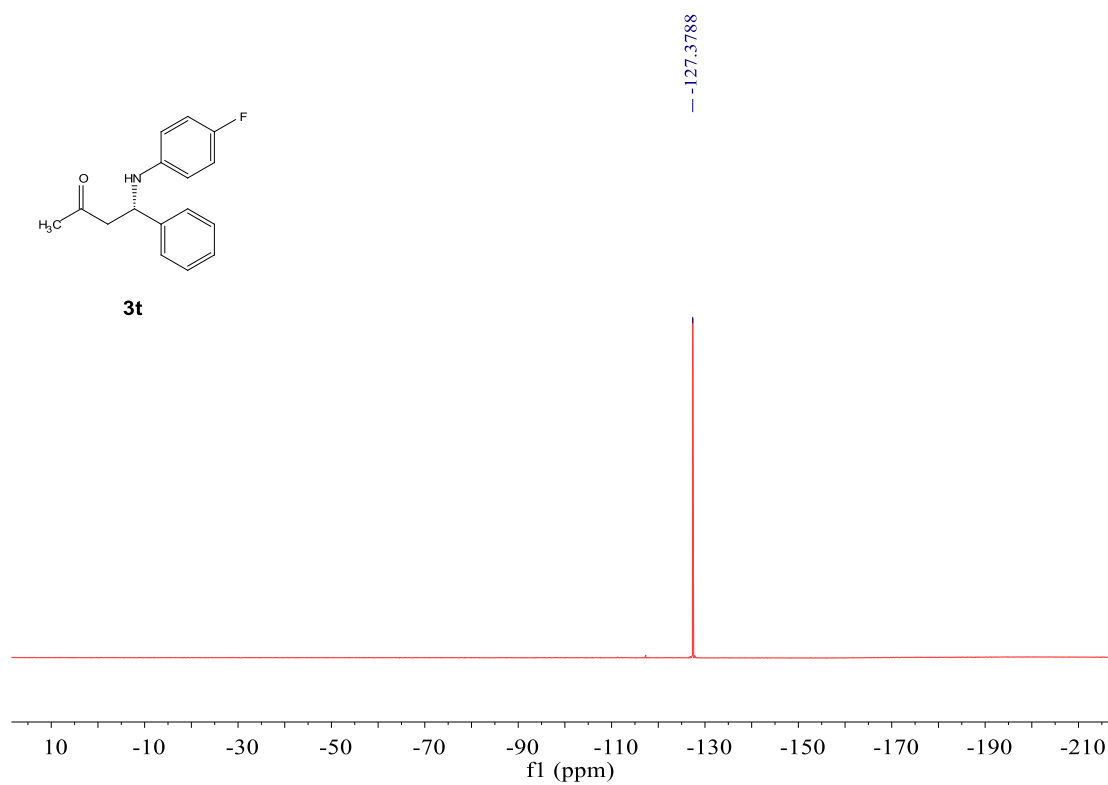

### <sup>1</sup>H NMR Spectrum (400 MHz, CDCl<sub>3</sub>) of 3u

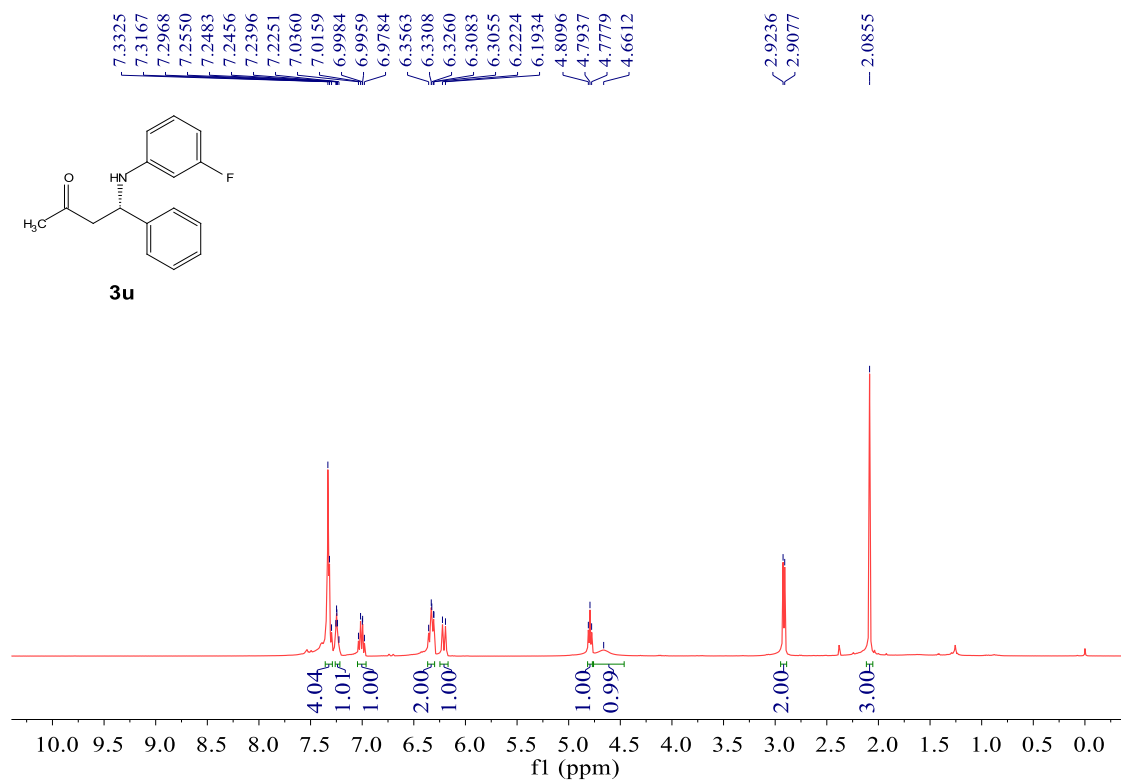

### <sup>13</sup>C NMR Spectrum (101 MHz, CDCl<sub>3</sub>) of 3u

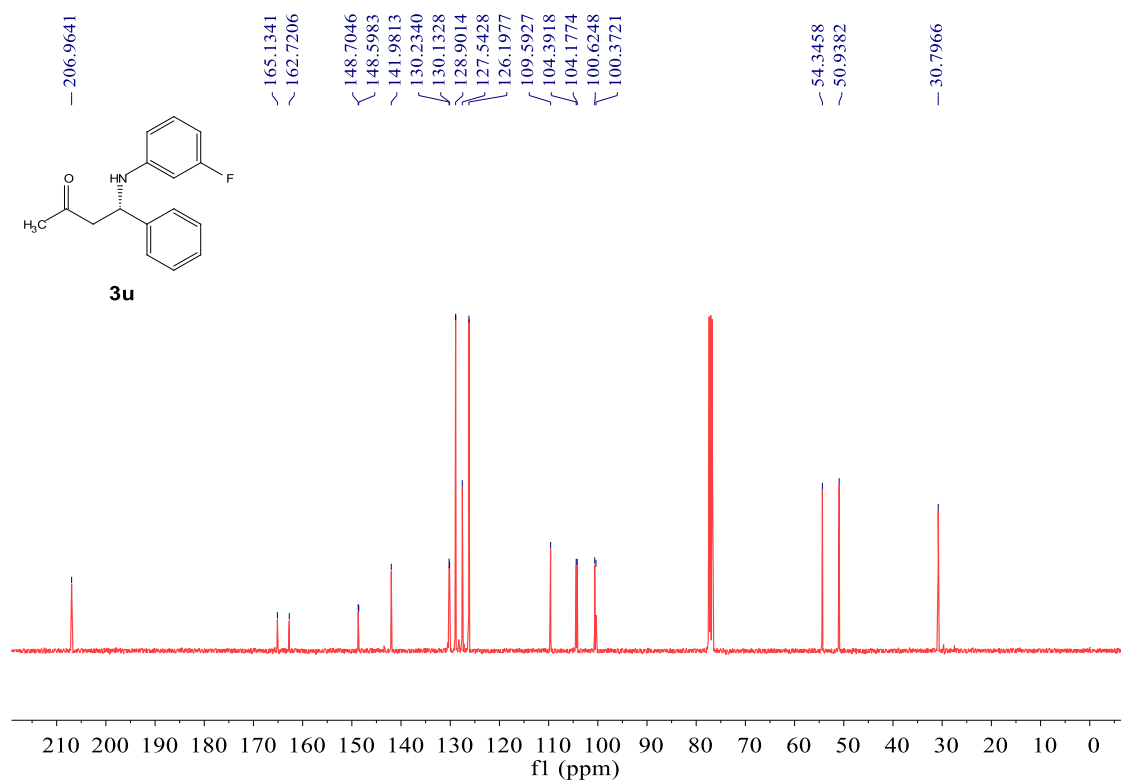

### <sup>19</sup>F NMR Spectrum (376 MHz, CDCl<sub>3</sub>) of 3u

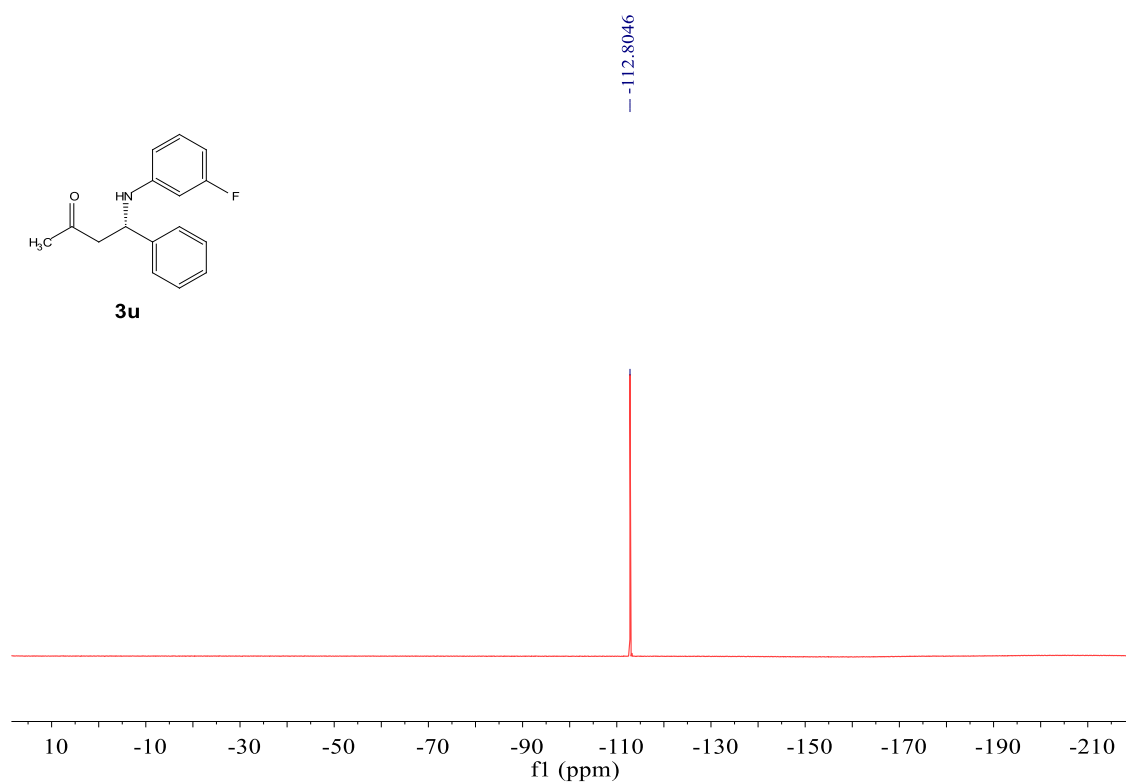

### <sup>1</sup>H NMR Spectrum (400 MHz, CDCl<sub>3</sub>) of 3v

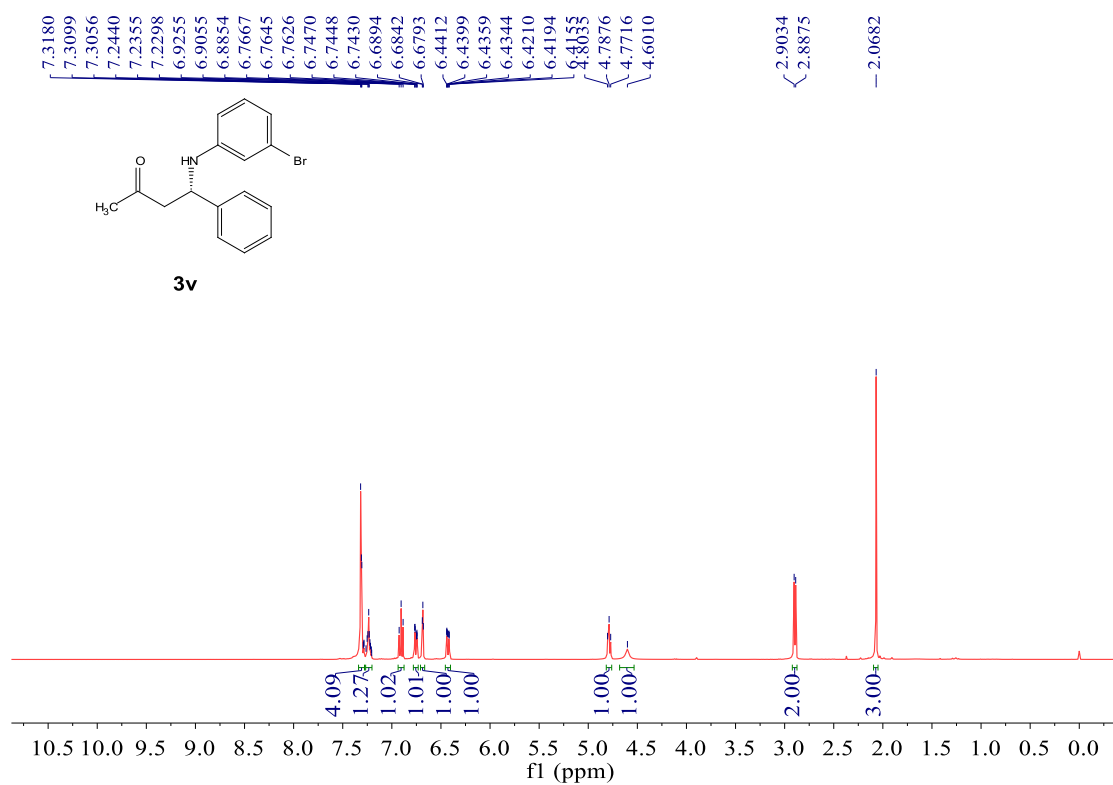

### <sup>13</sup>C NMR Spectrum (101 MHz, CDCl<sub>3</sub>) of 3v

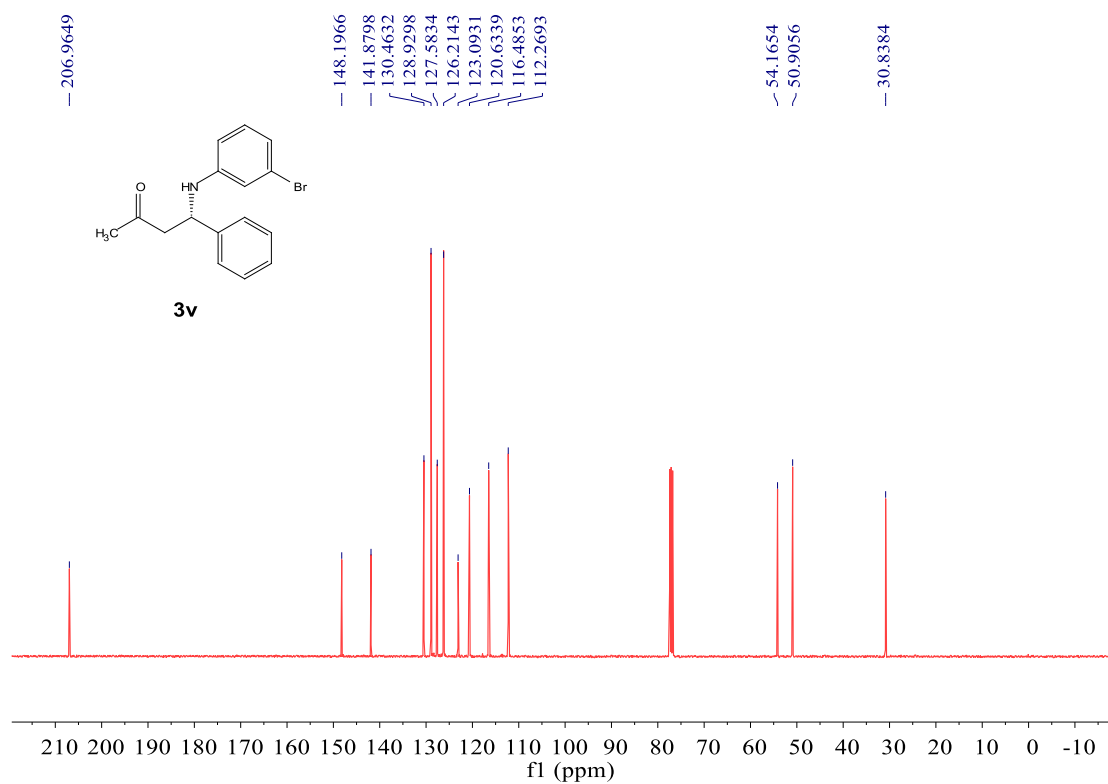

### <sup>1</sup>H NMR Spectrum (600 MHz, CDCl<sub>3</sub>) of 3w

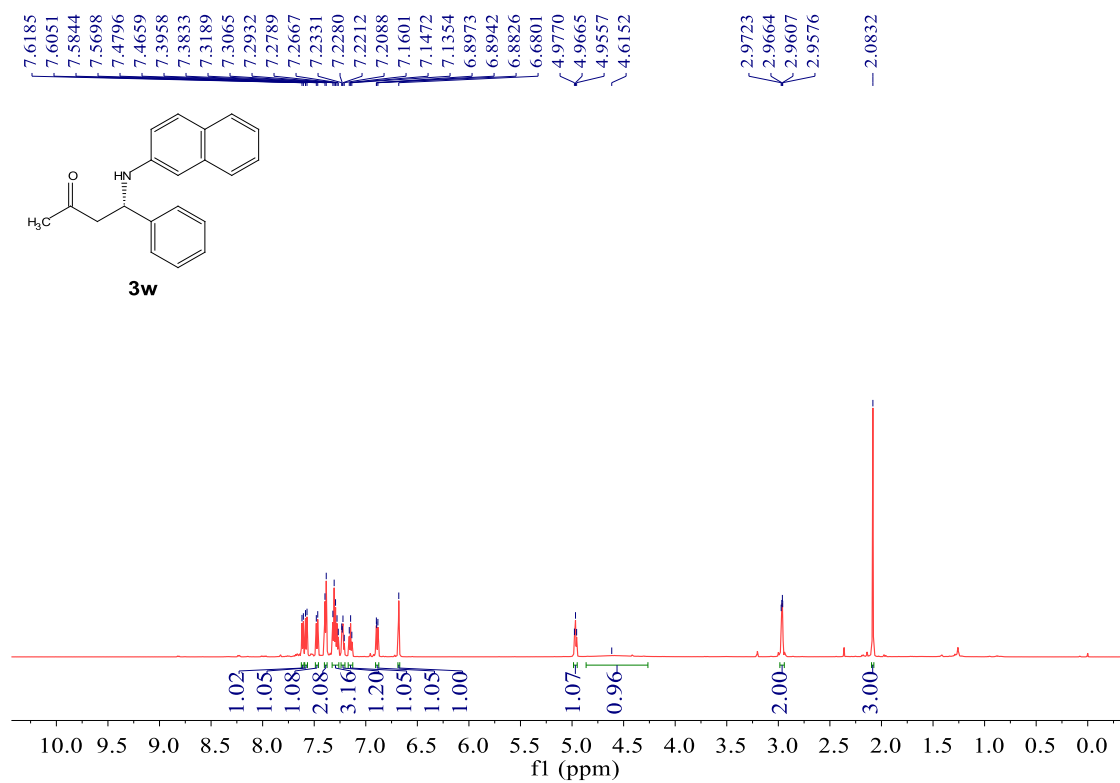

### <sup>13</sup>C NMR Spectrum (151 MHz, CDCl<sub>3</sub>) of 3w

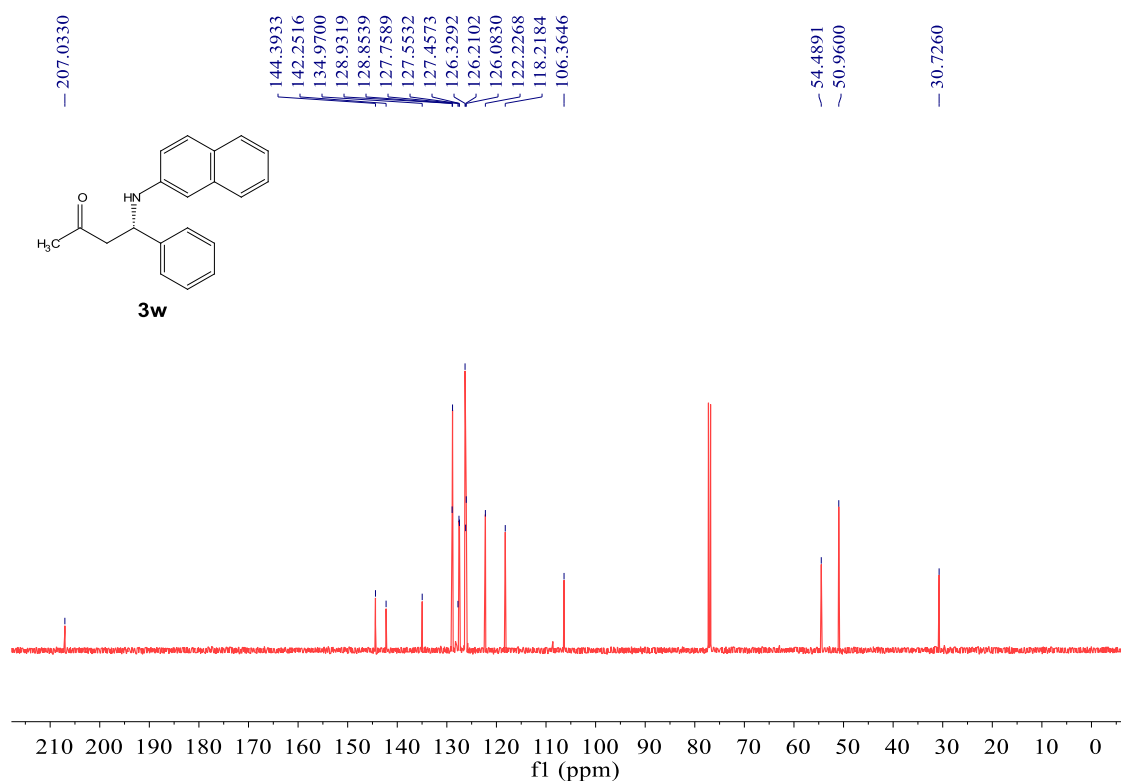

### <sup>1</sup>H NMR Spectrum (600 MHz, CDCl<sub>3</sub>) of 3x and 3y

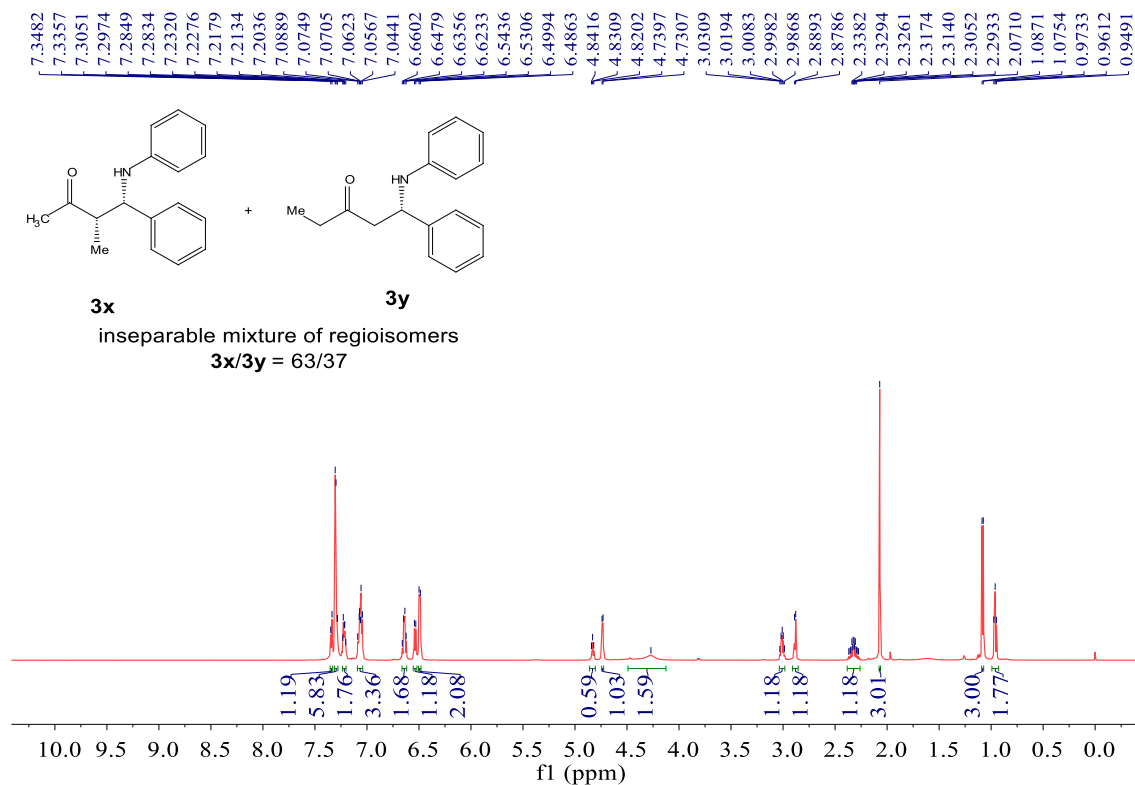

**<sup>13</sup>C NMR Spectrum (151 MHz, CDCl<sub>3</sub>) of 3x and 3y**

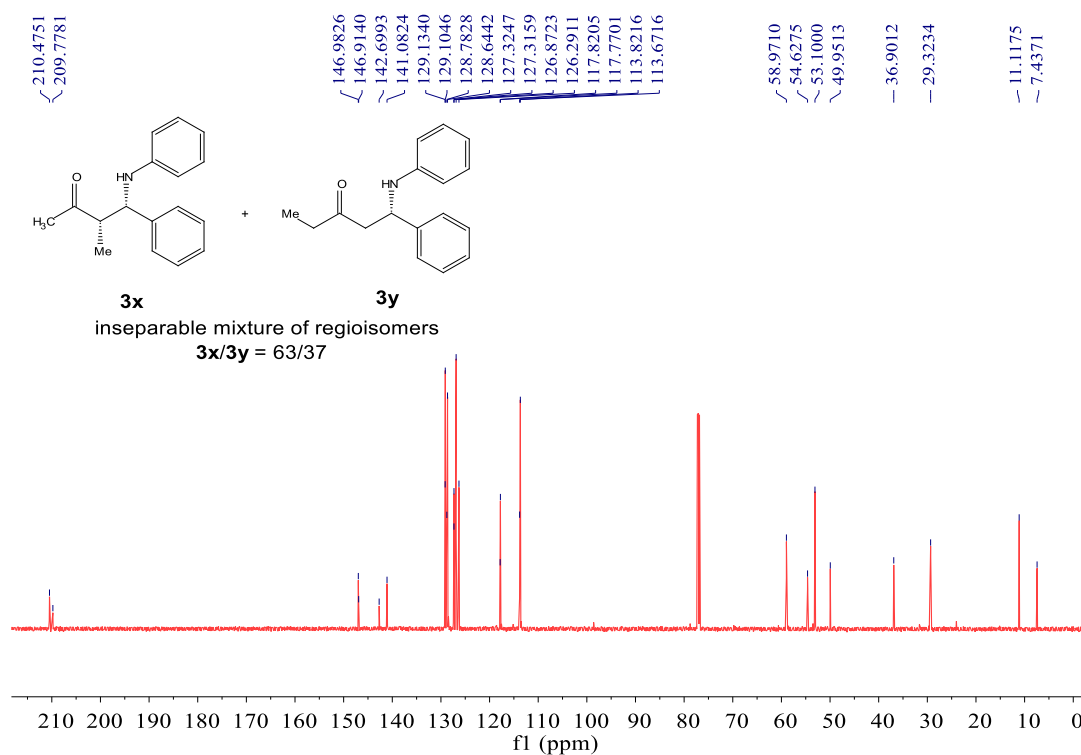

**<sup>1</sup>H NMR Spectrum (400 MHz, CDCl<sub>3</sub>) of 3z and 3aa**

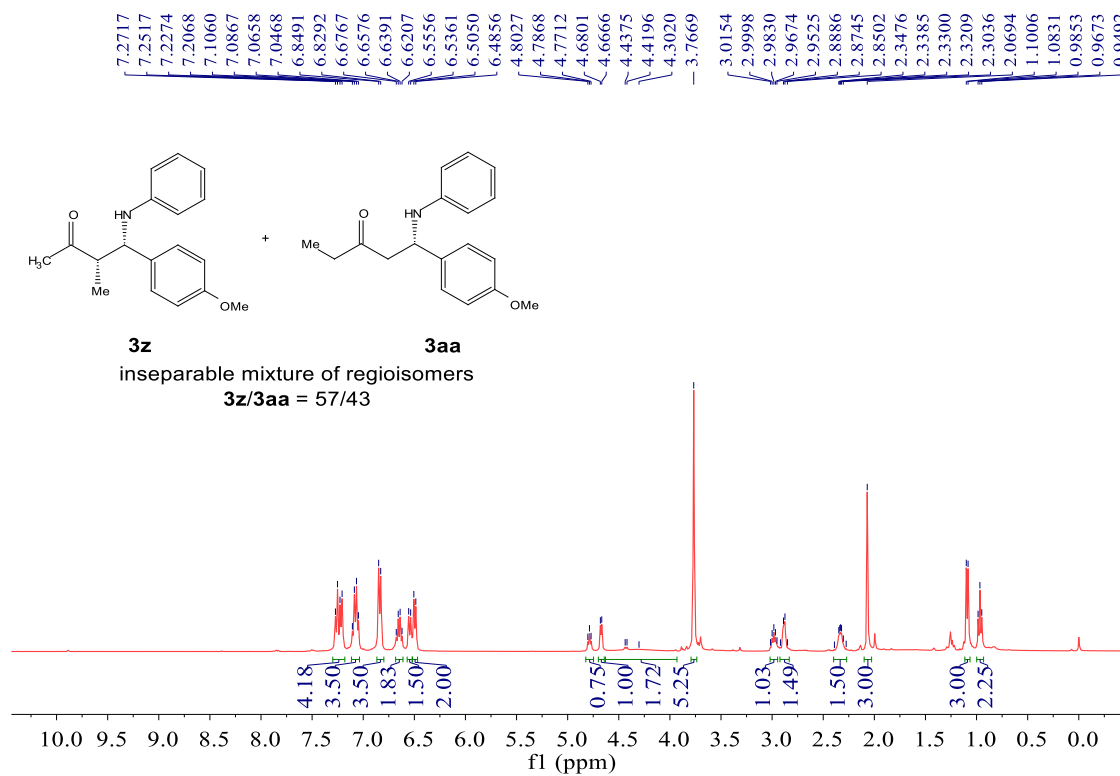

### $^{13}\text{C}$ NMR Spectrum (101 MHz, $\text{CDCl}_3$ ) of **3z** and **3aa**

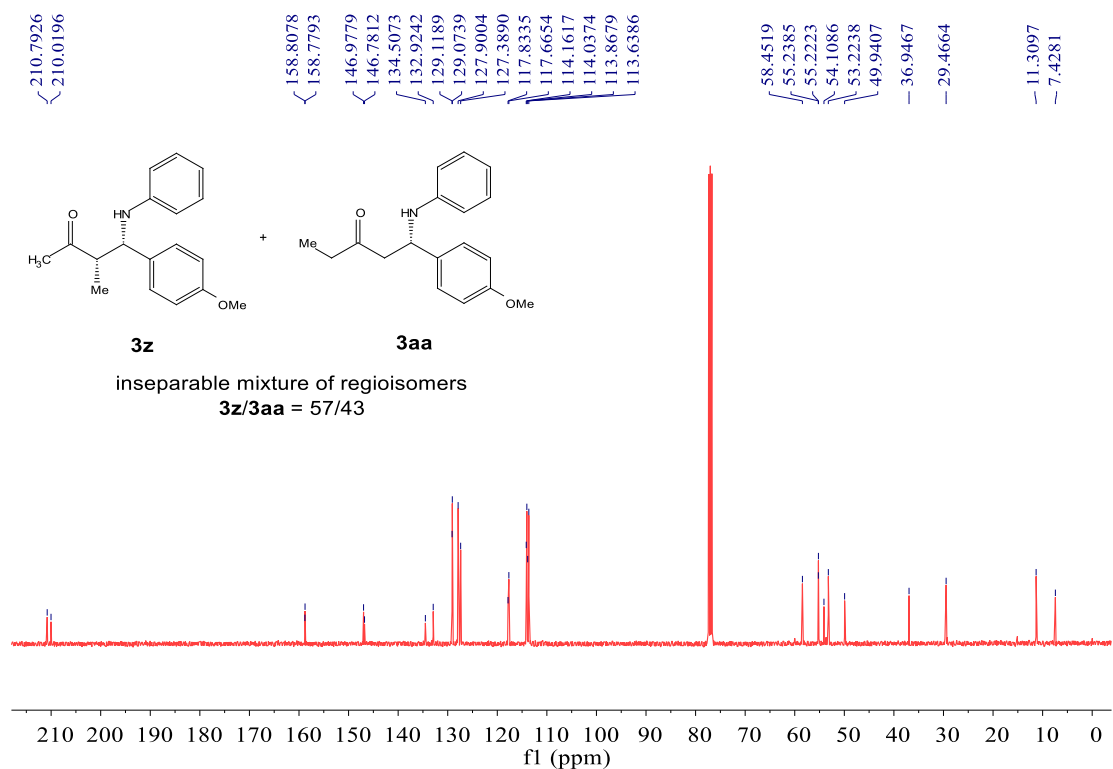

### $^1\text{H}$ NMR Spectrum (400 MHz, $\text{CDCl}_3$ ) of **3ab**

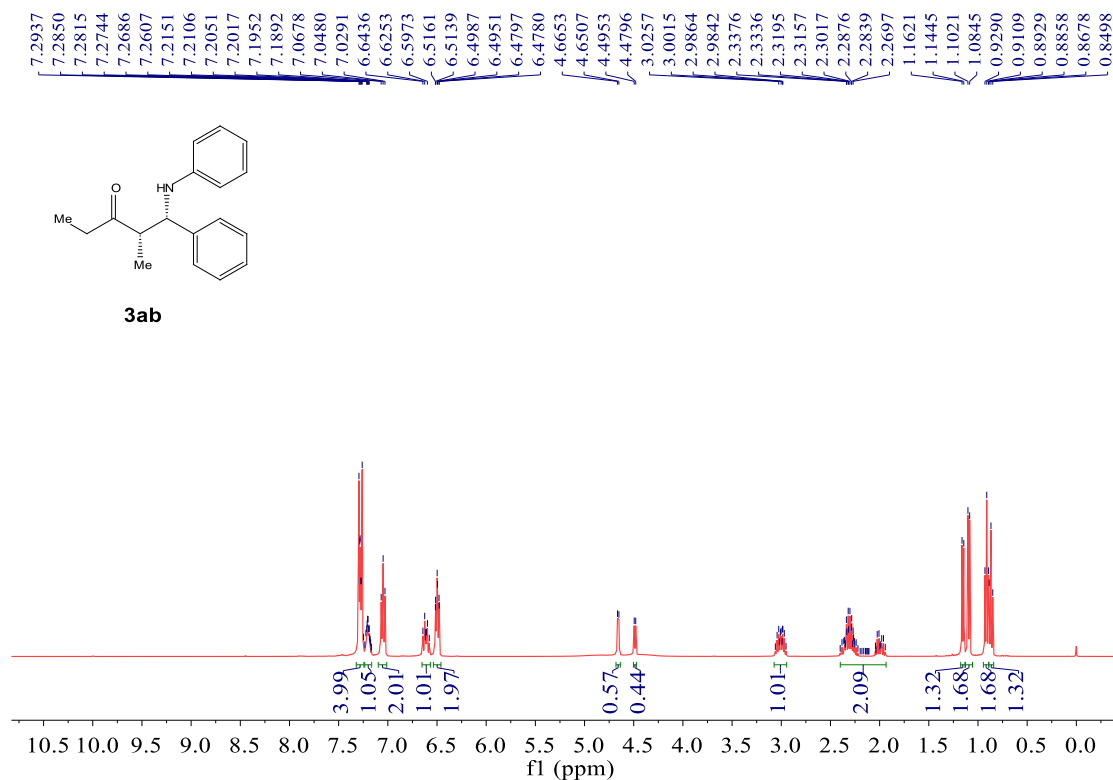

### <sup>13</sup>C NMR Spectrum (101 MHz, CDCl<sub>3</sub>) of 3ab

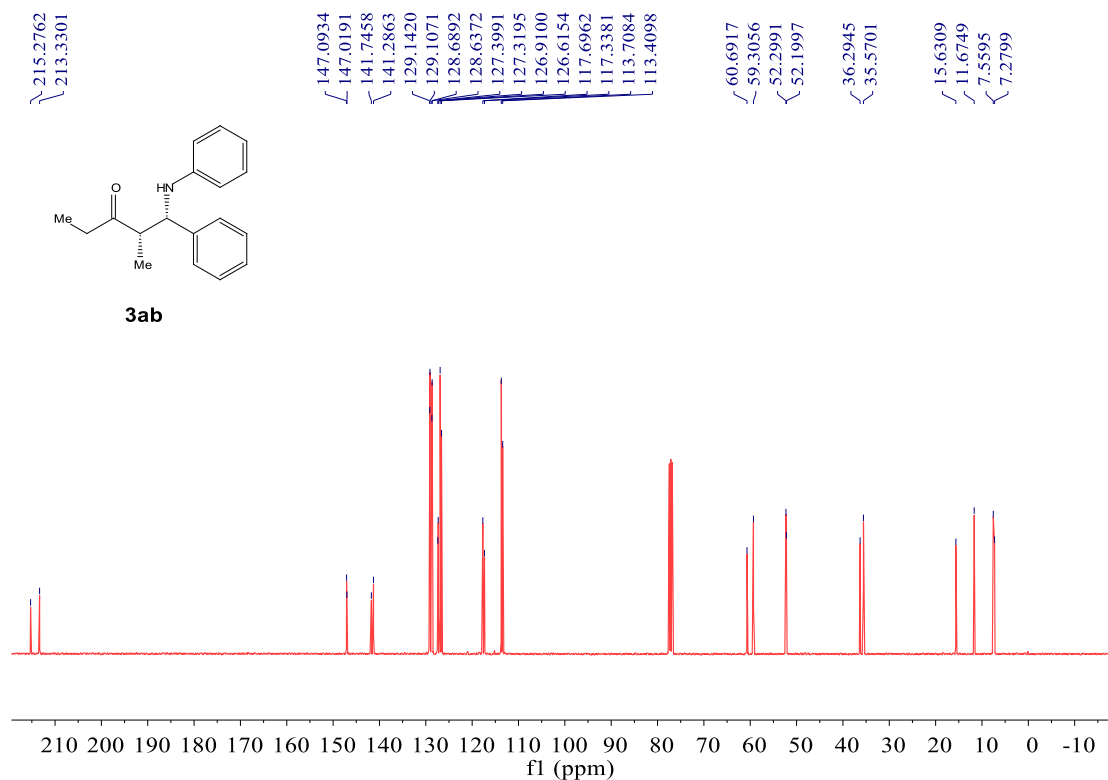

### <sup>1</sup>H NMR Spectrum (600 MHz, CDCl<sub>3</sub>) of 3ac

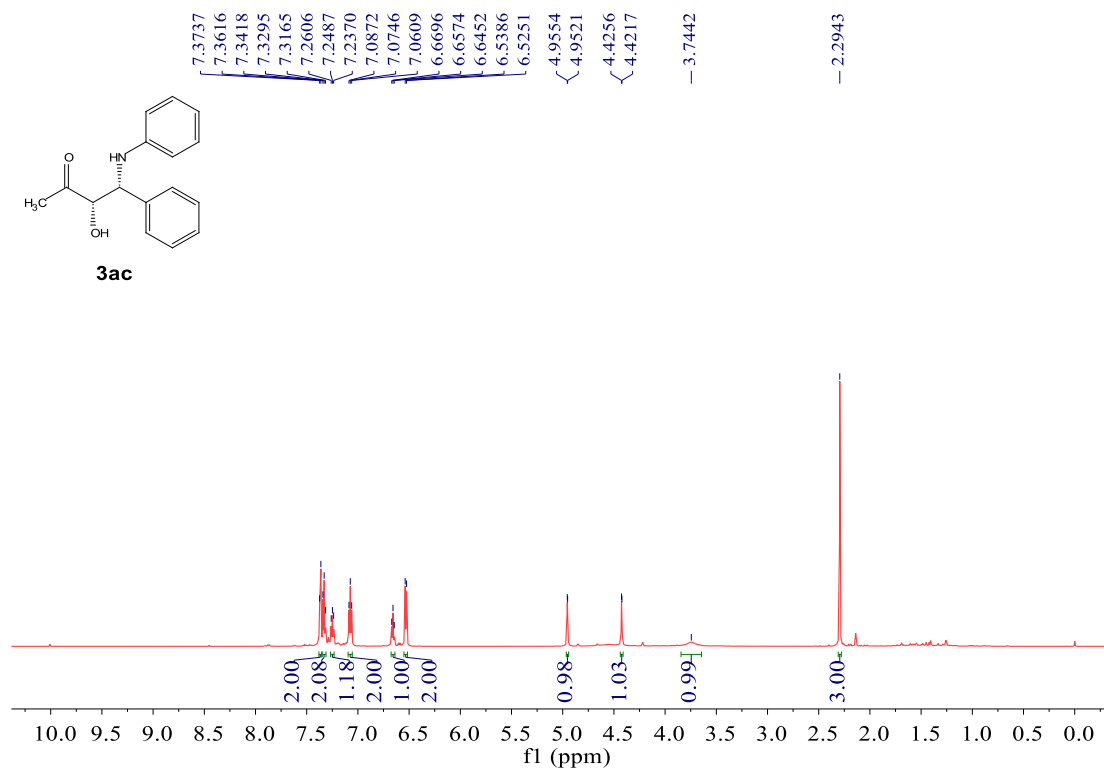



### <sup>13</sup>C NMR Spectrum (151 MHz, CDCl<sub>3</sub>) of 3ac

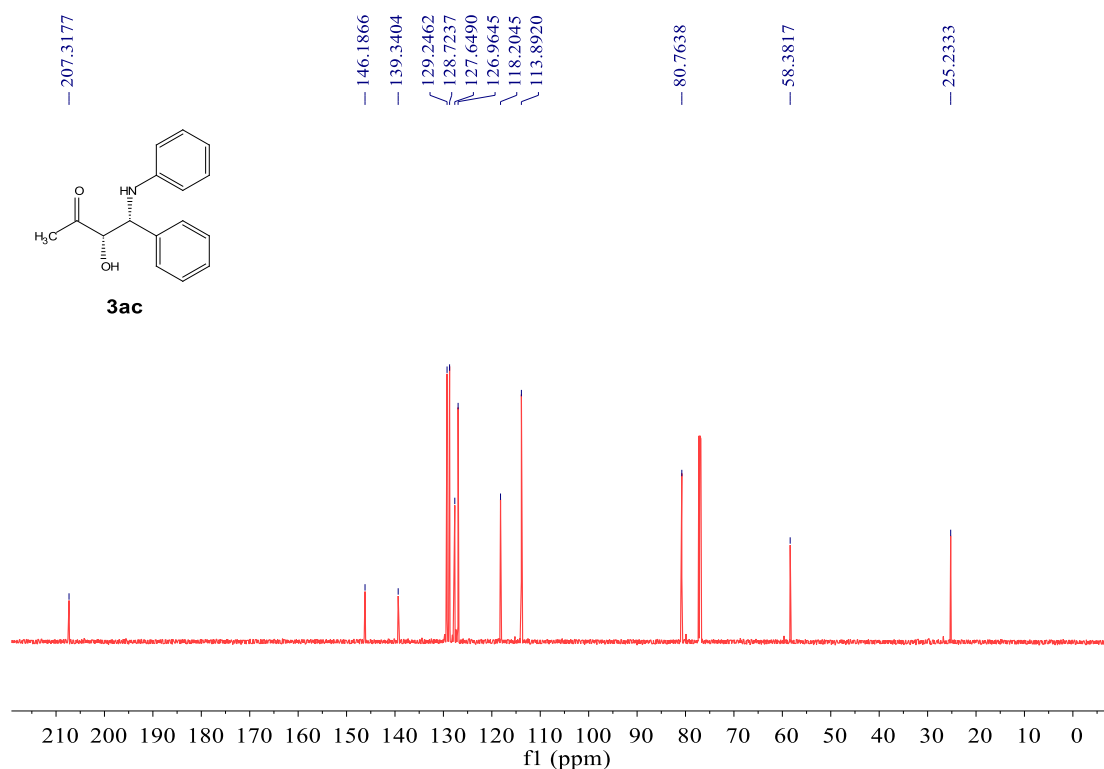

### <sup>1</sup>H NMR Spectrum (400 MHz, CDCl<sub>3</sub>) of 3ad

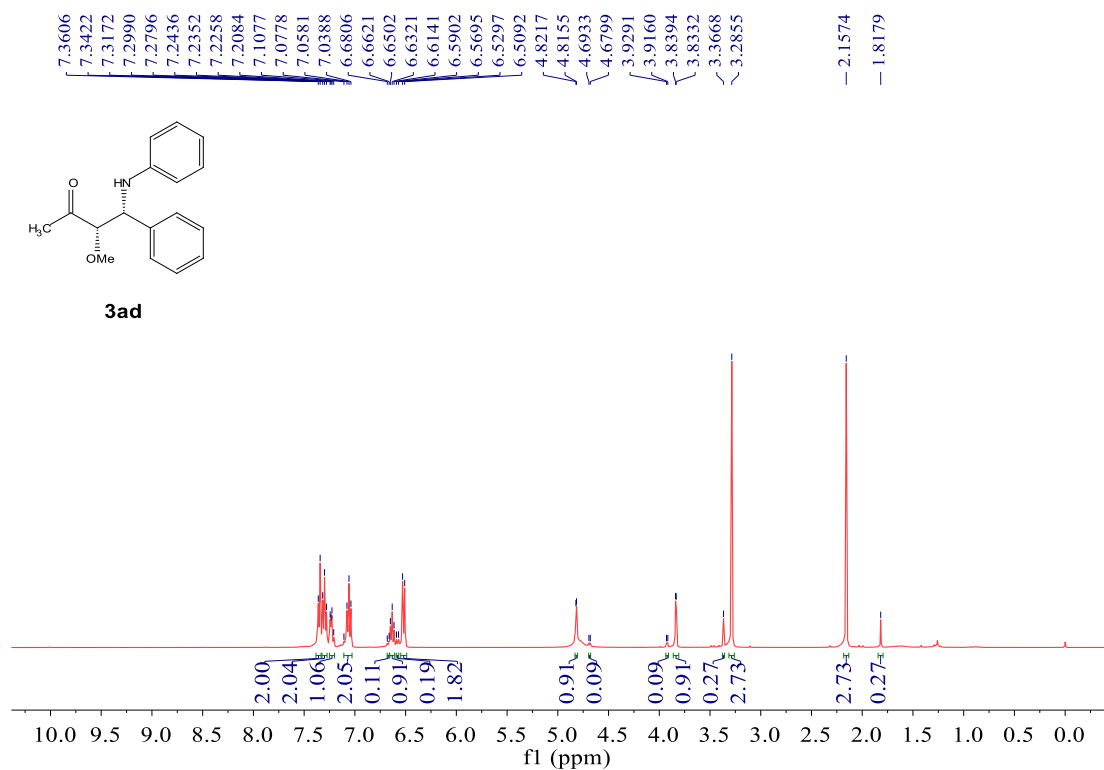

### $^{13}\text{C}$ NMR Spectrum (101 MHz, $\text{CDCl}_3$ ) of **3ad**

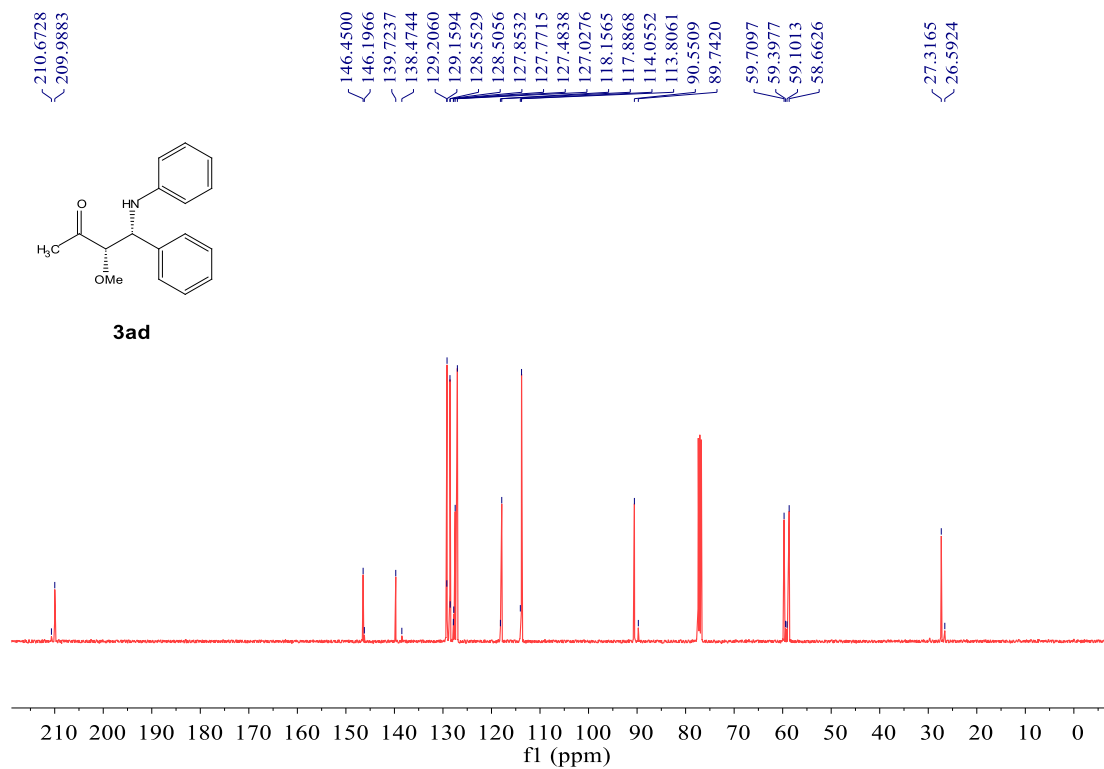

### $^1\text{H}$ NMR Spectrum (400 MHz, $\text{CDCl}_3$ ) of **3ae**

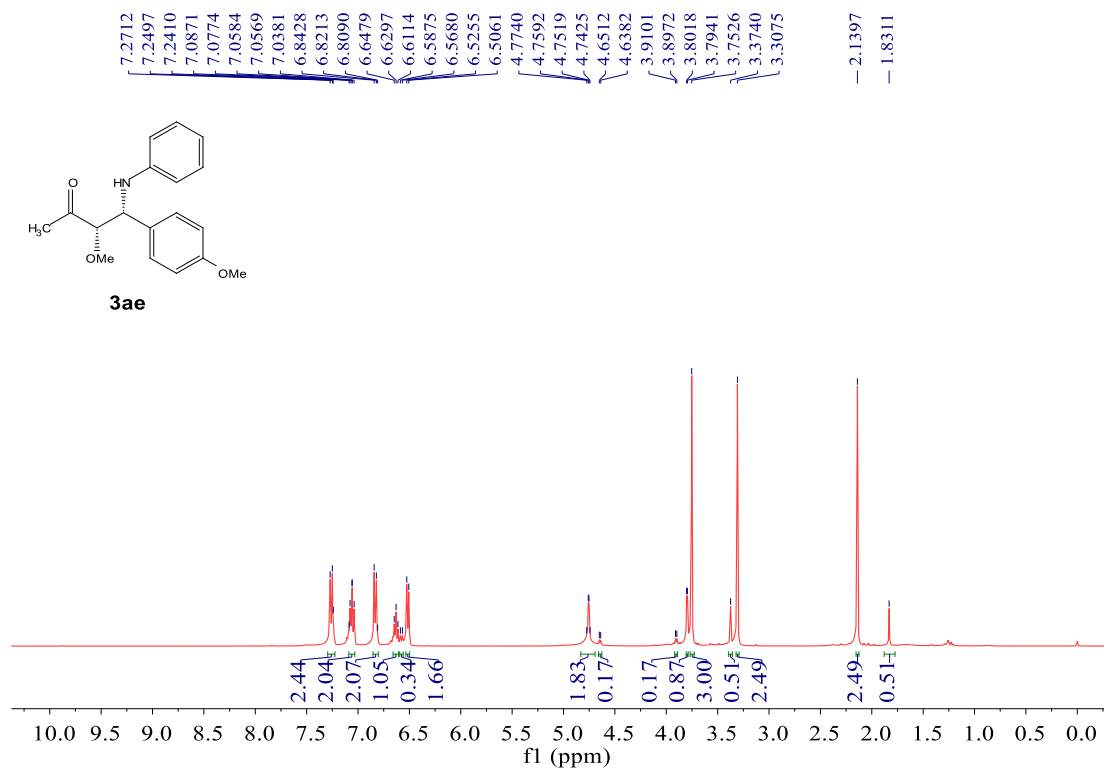

### $^{13}\text{C}$ NMR Spectrum (101 MHz, $\text{CDCl}_3$ ) of **3ae**

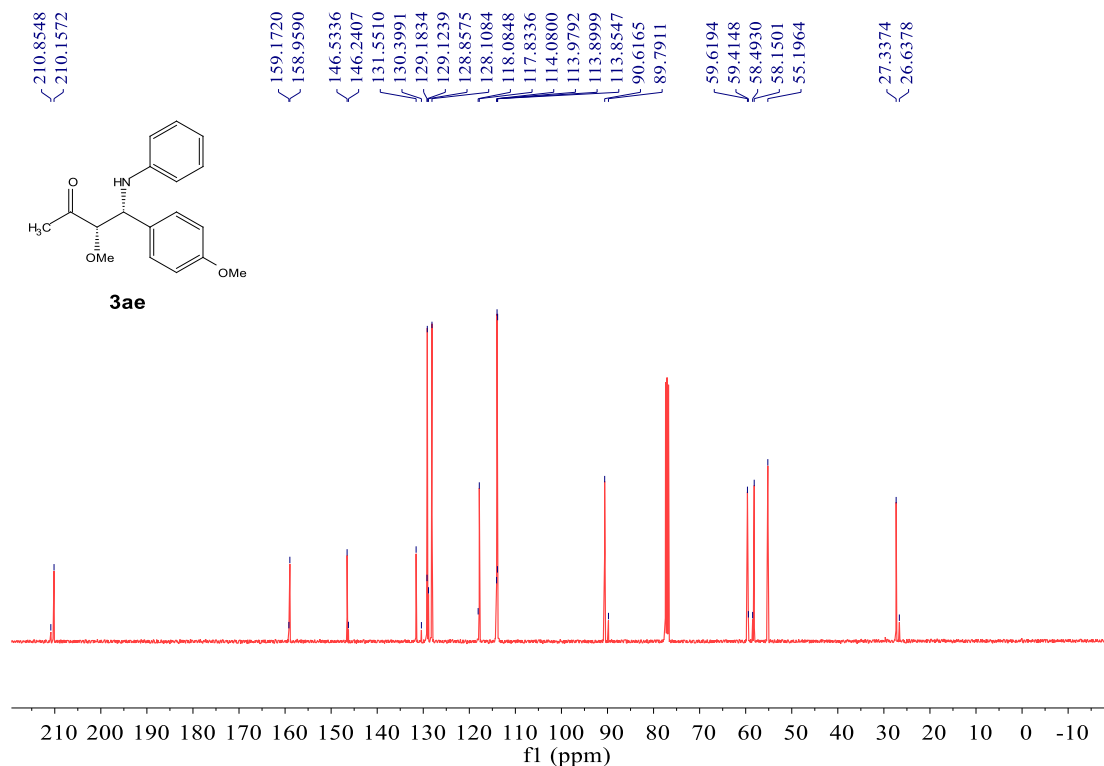

### $^1\text{H}$ NMR Spectrum (400 MHz, $\text{CDCl}_3$ ) of **3af**

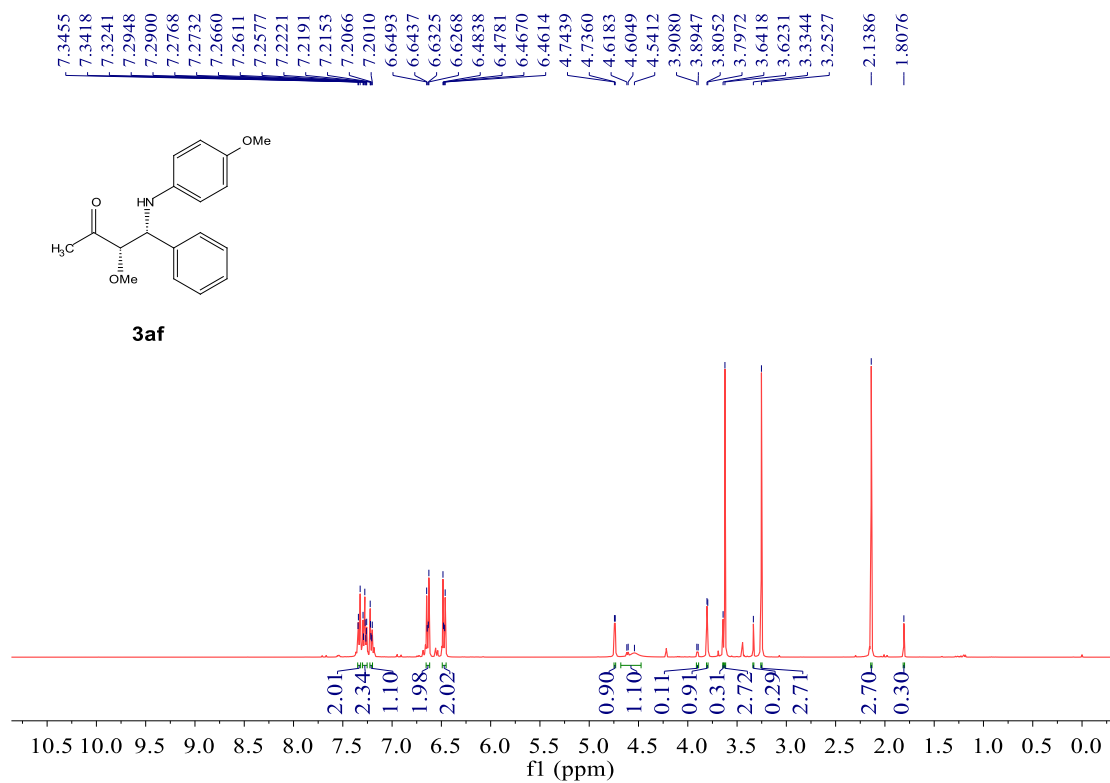

### <sup>13</sup>C NMR Spectrum (101 MHz, CDCl<sub>3</sub>) of 3af

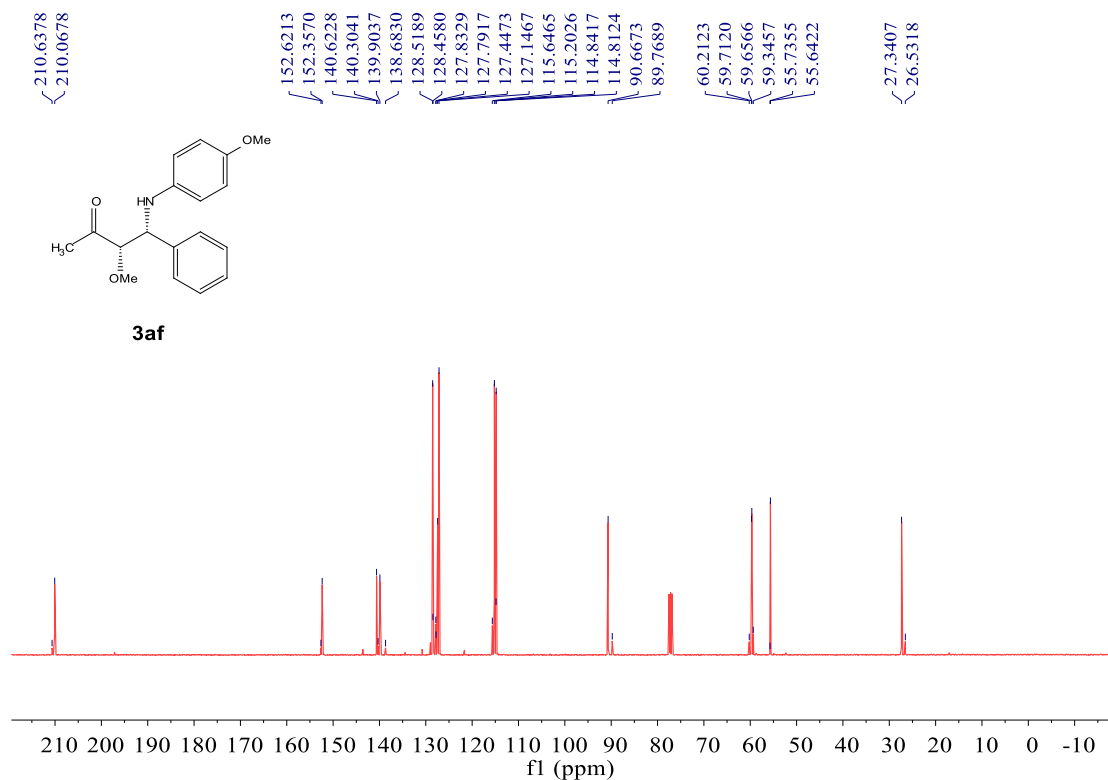

### <sup>1</sup>H NMR Spectrum (400 MHz, CDCl<sub>3</sub>) of 3ag

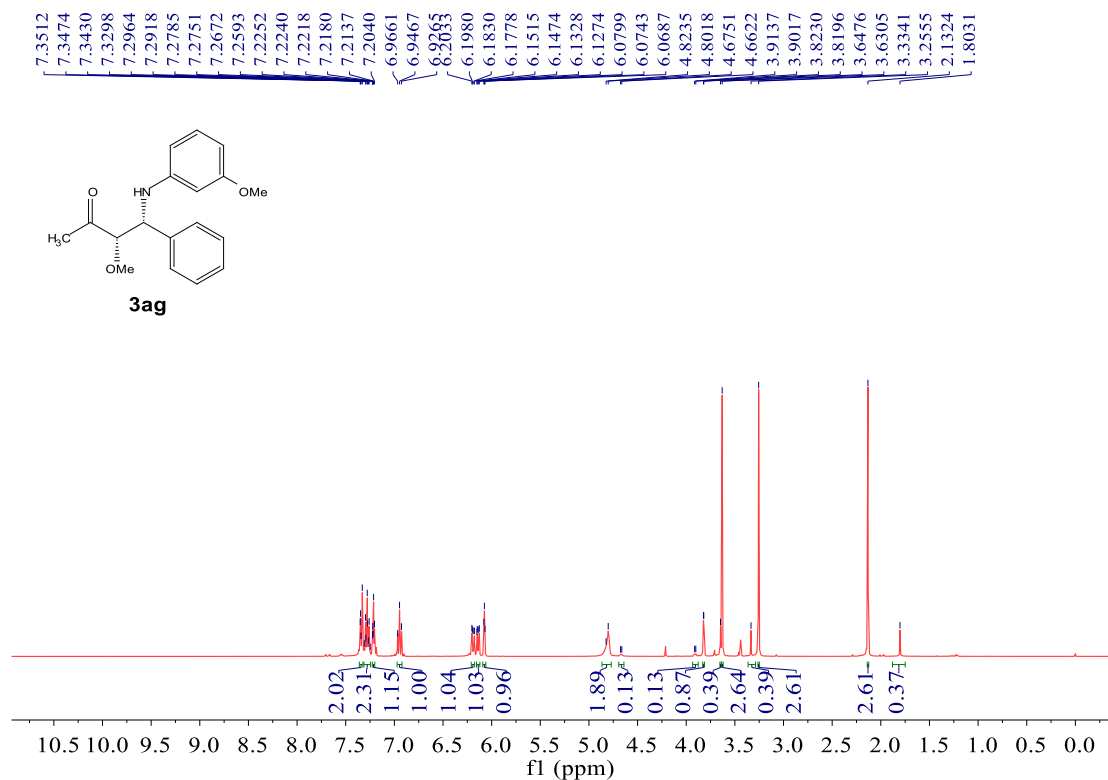

**<sup>13</sup>C NMR Spectrum (101 MHz, CDCl<sub>3</sub>) of 3ag**

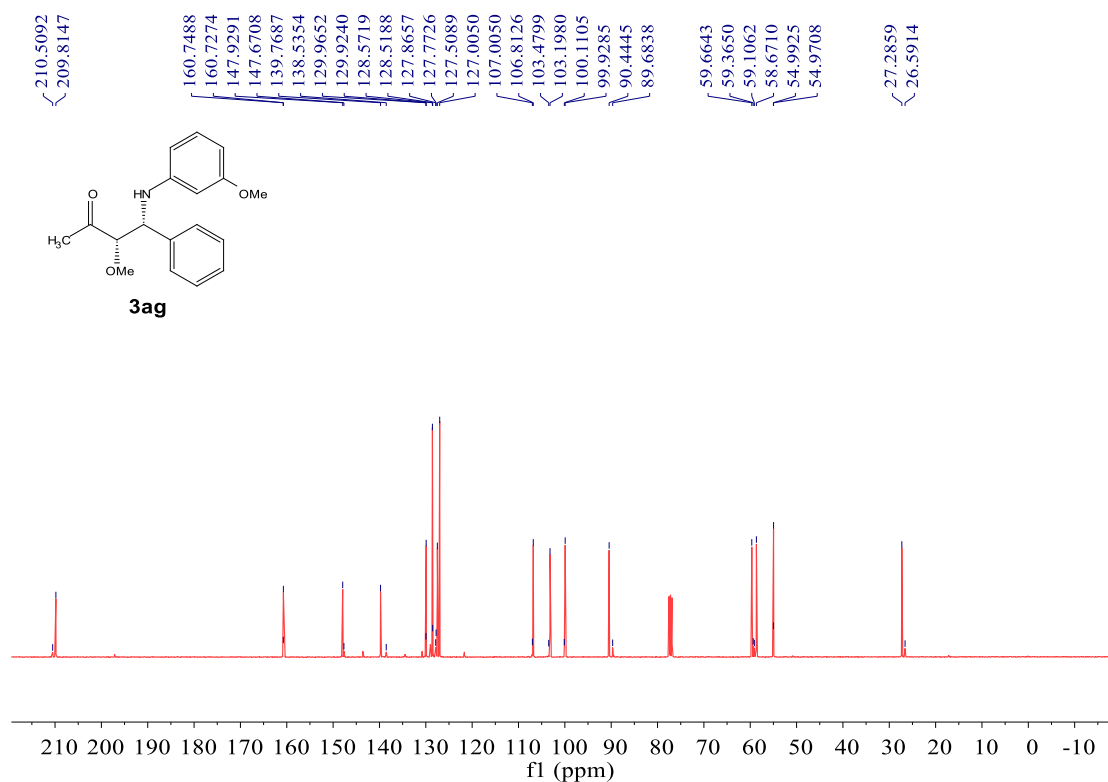

**<sup>1</sup>H NMR Spectrum (400 MHz, CDCl<sub>3</sub>) of 3ah**

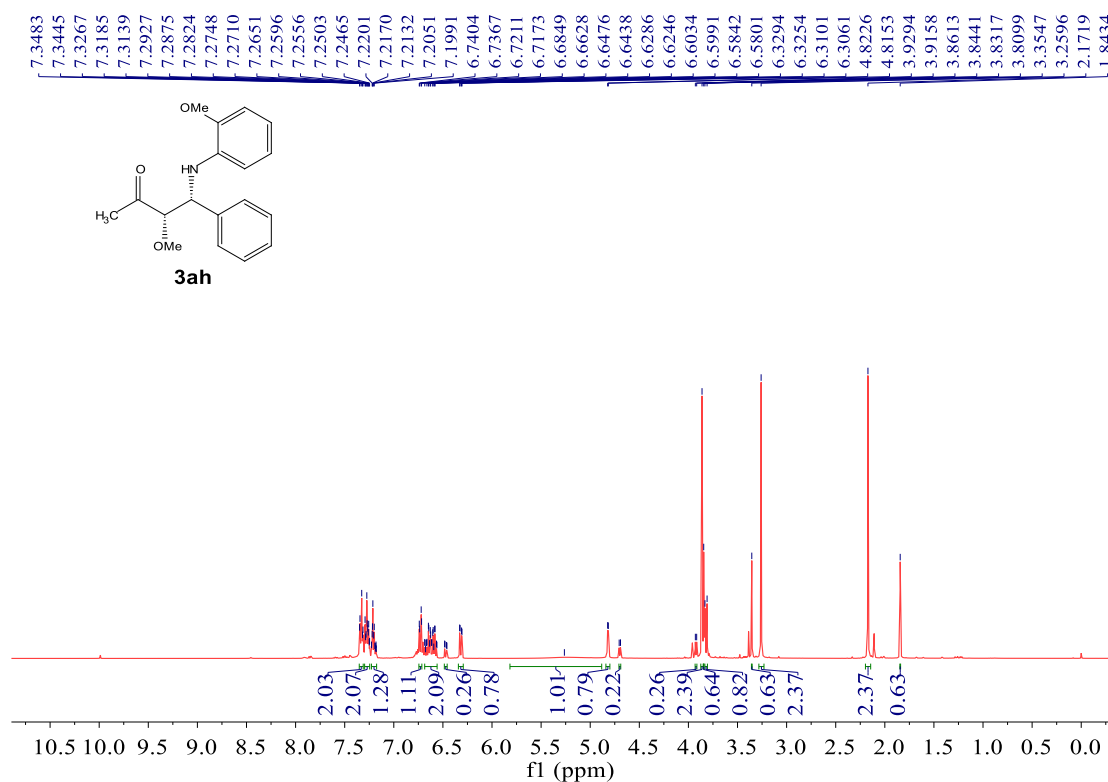

### <sup>13</sup>C NMR Spectrum (101 MHz, CDCl<sub>3</sub>) of 3ah

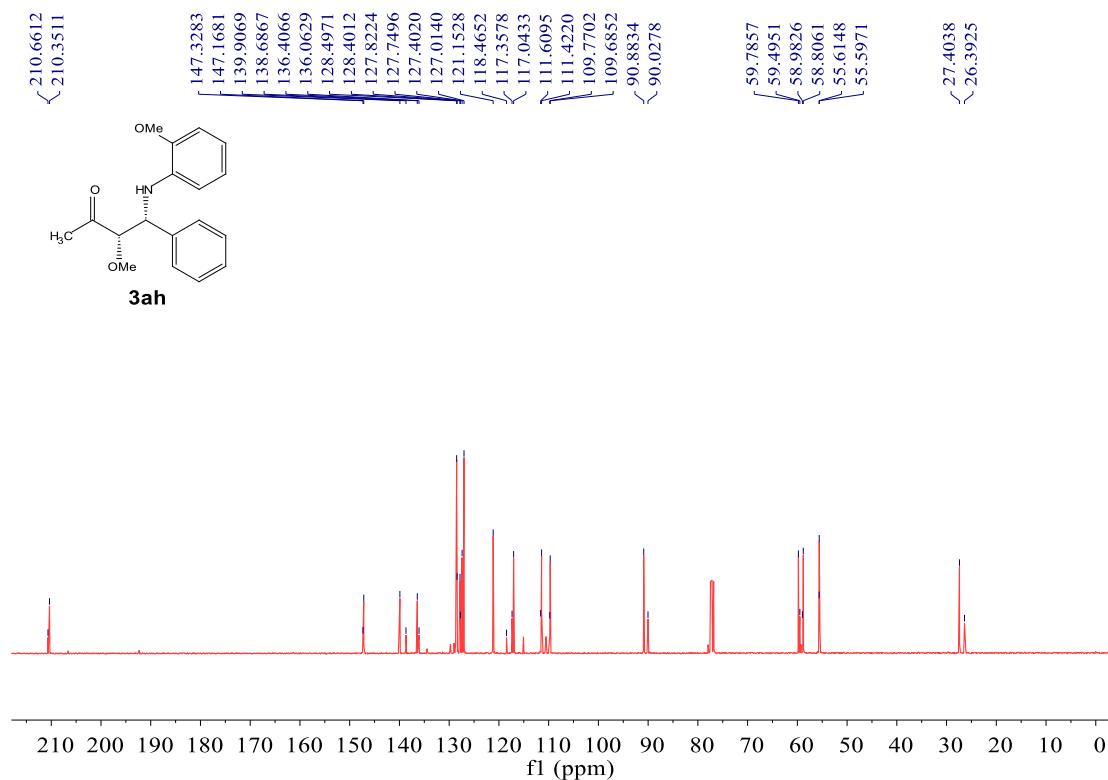

### <sup>1</sup>H NMR Spectrum (400 MHz, CDCl<sub>3</sub>) of 3ai

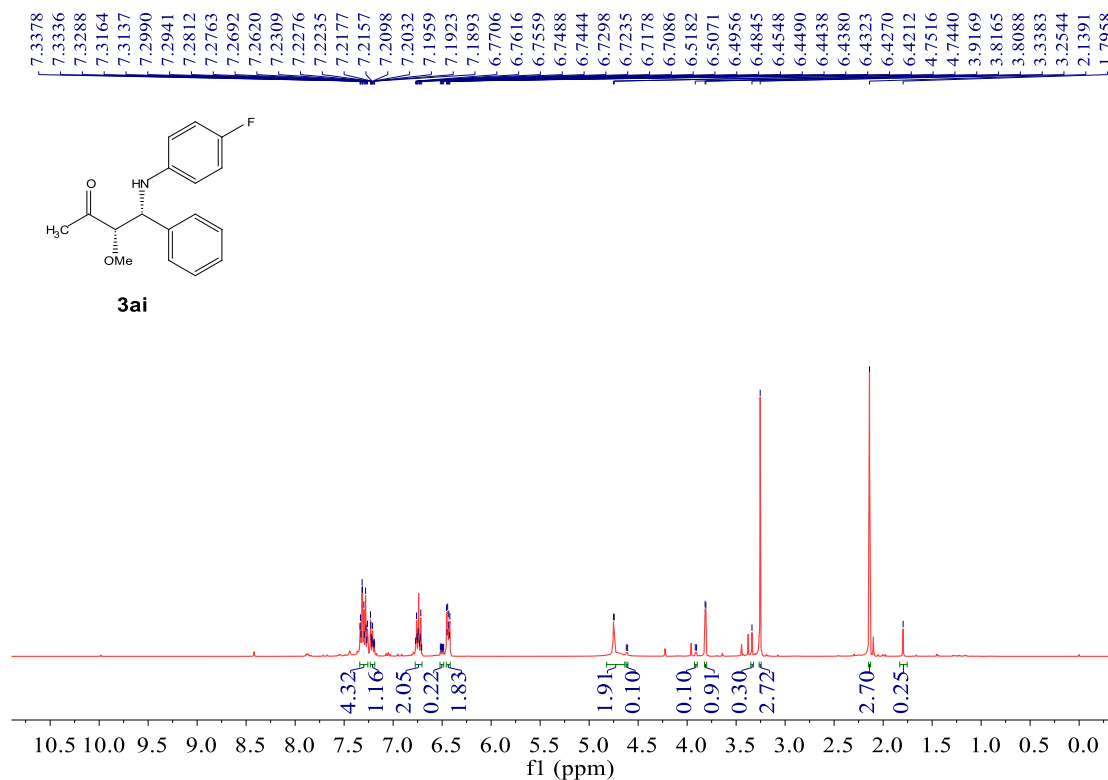

### <sup>13</sup>C NMR Spectrum (101 MHz, CDCl<sub>3</sub>) of 3ai

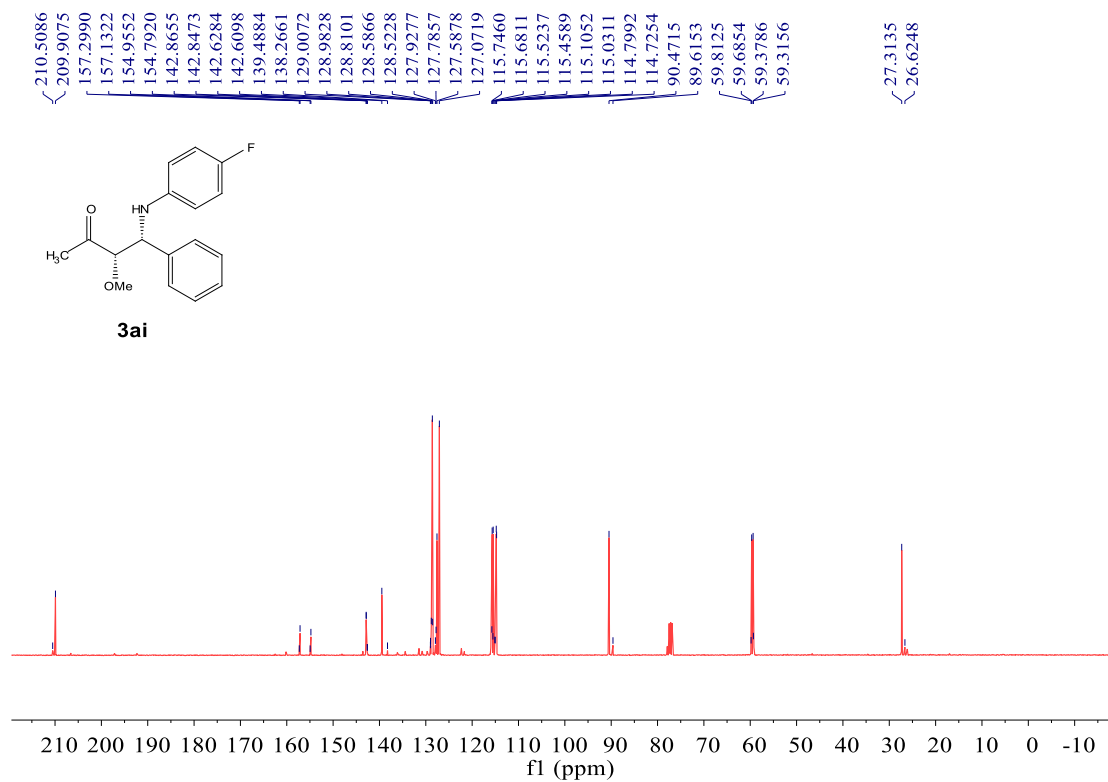

### <sup>19</sup>F NMR Spectrum (376 MHz, CDCl<sub>3</sub>) of 3ai

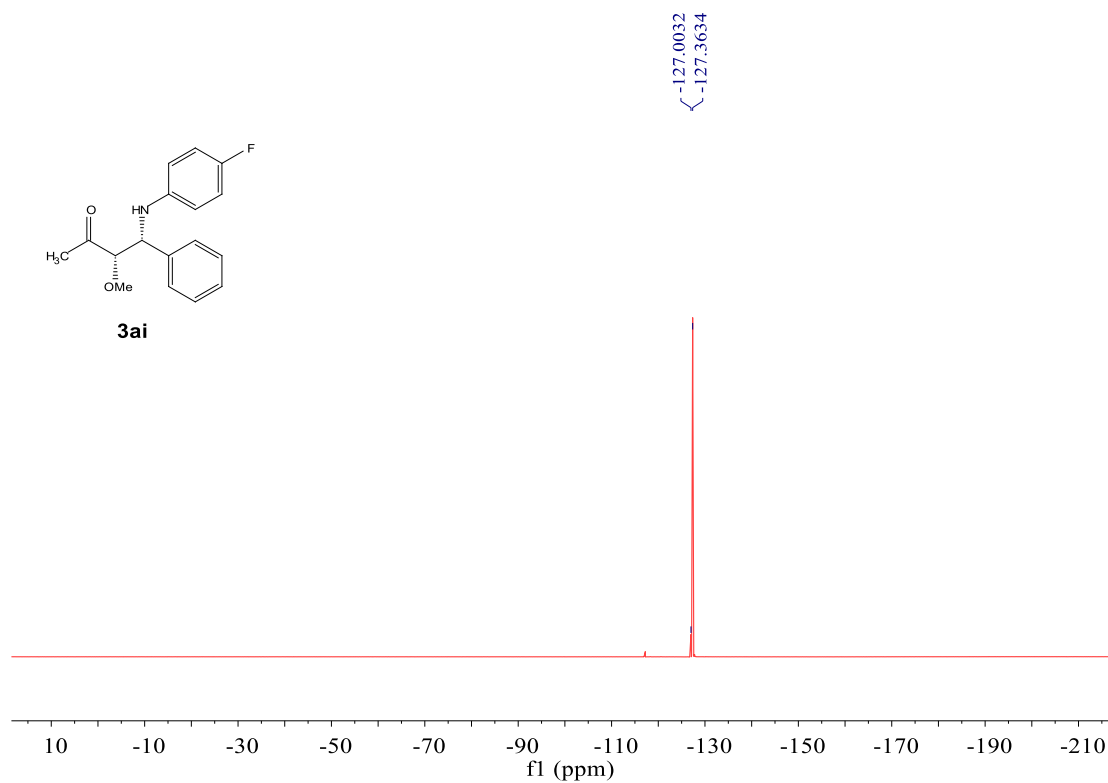

### <sup>1</sup>H NMR Spectrum (400 MHz, CDCl<sub>3</sub>) of 3aj

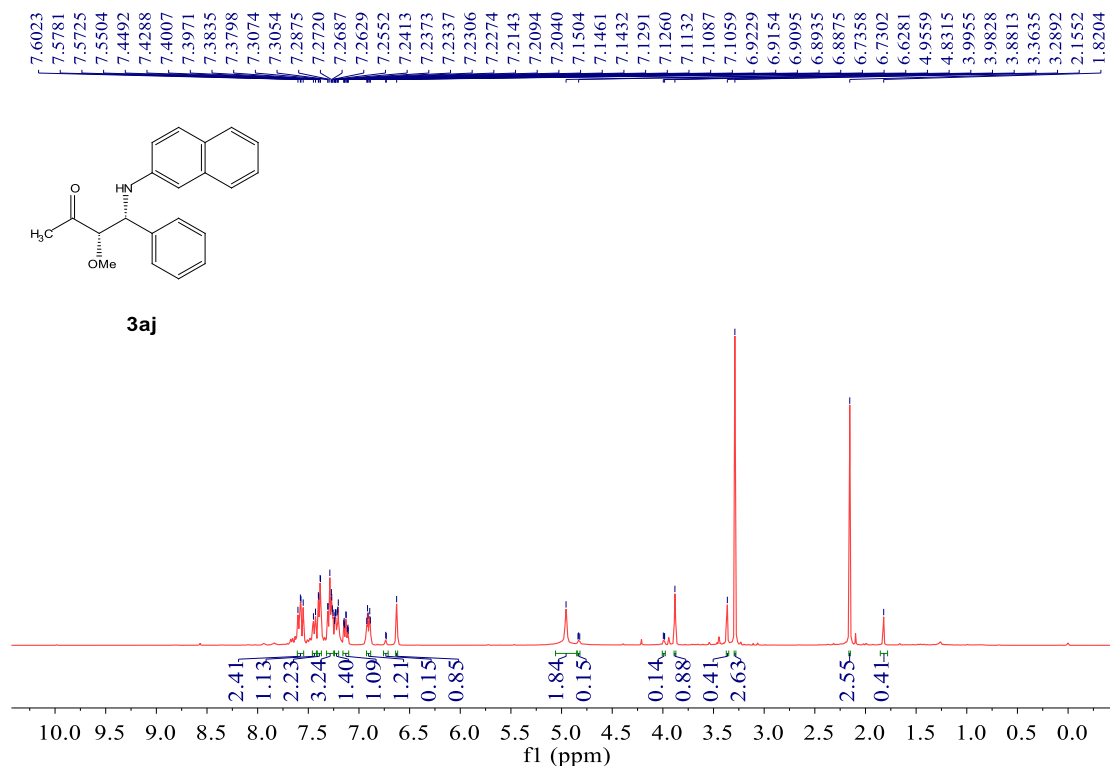

### <sup>13</sup>C NMR Spectrum (101 MHz, CDCl<sub>3</sub>) of 3aj

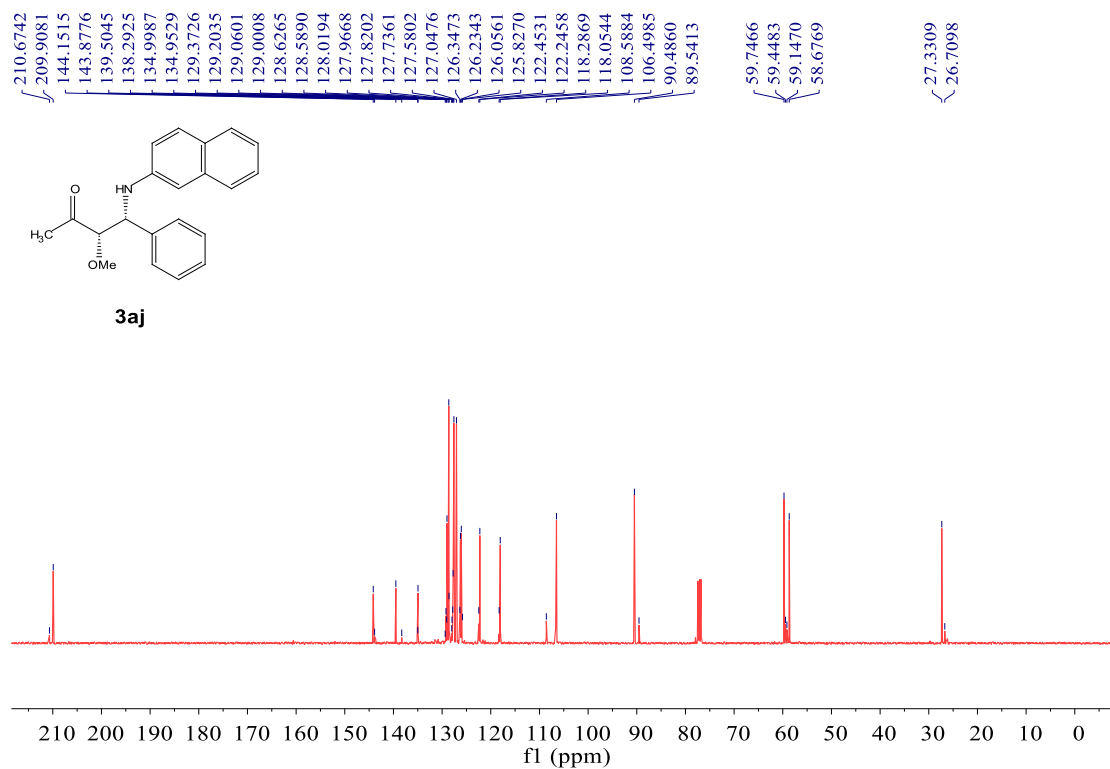



### <sup>1</sup>H NMR Spectrum (600 MHz, CDCl<sub>3</sub>) of 3ak

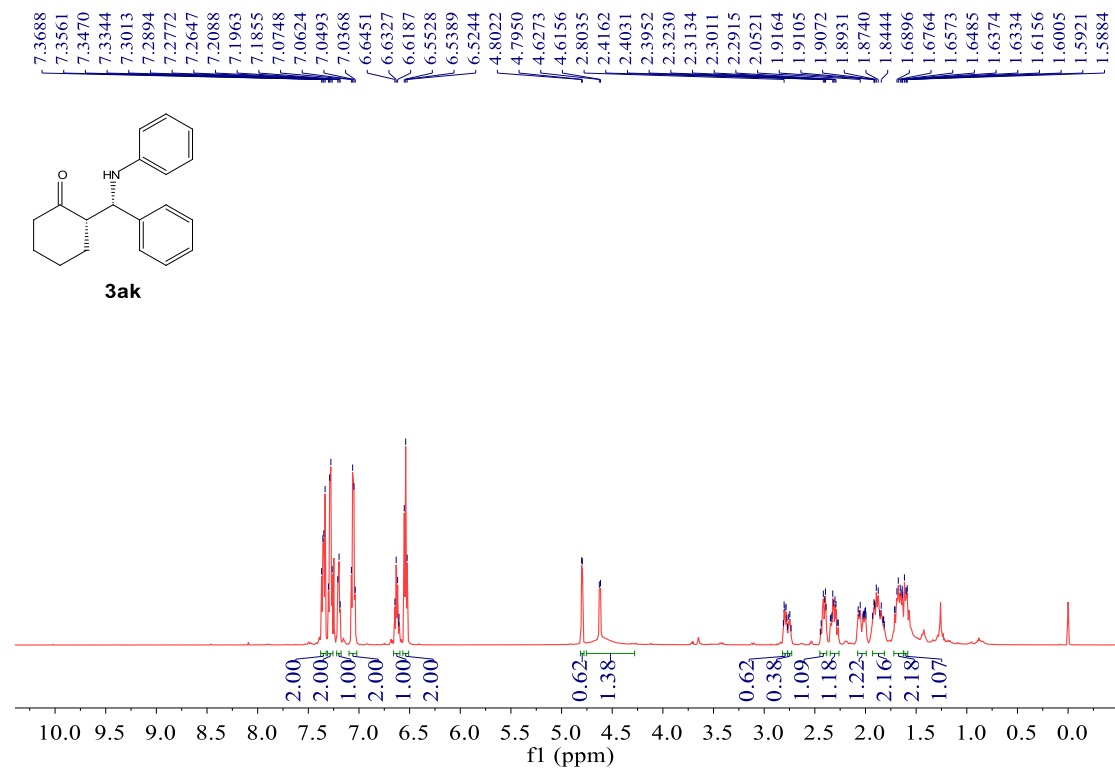

### <sup>13</sup>C NMR Spectrum (151 MHz, CDCl<sub>3</sub>) of 3ak

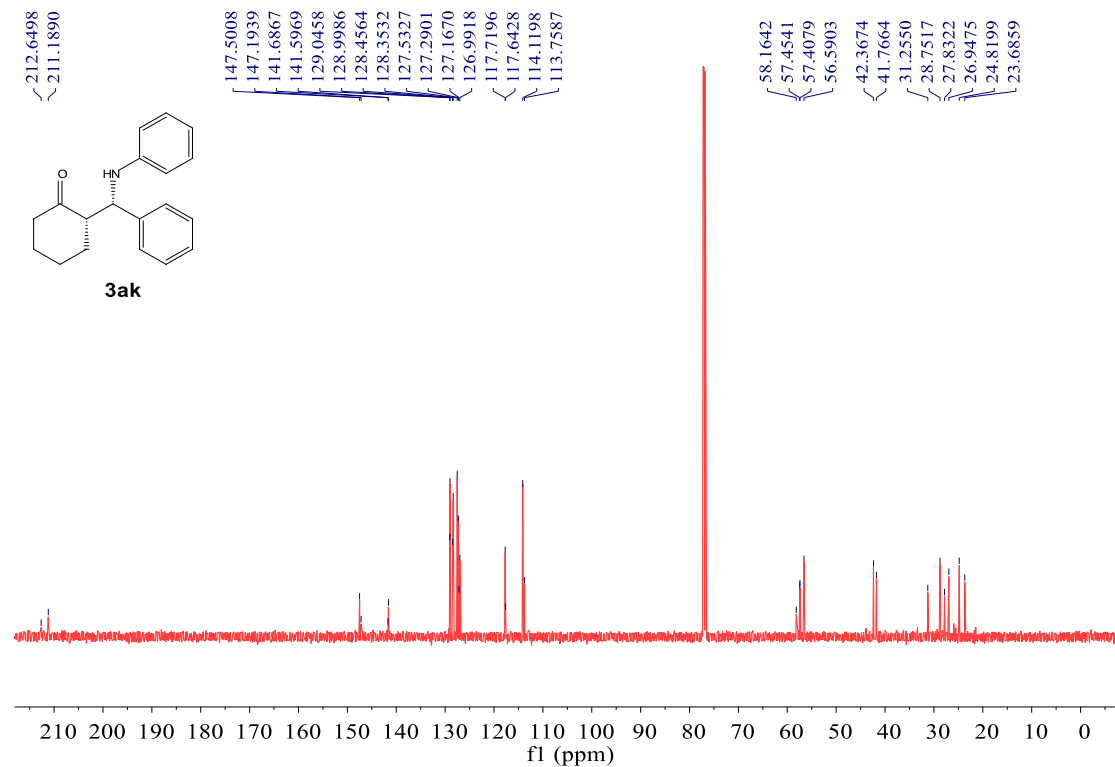

### <sup>1</sup>H NMR Spectrum (400 MHz, CDCl<sub>3</sub>) of 3aI

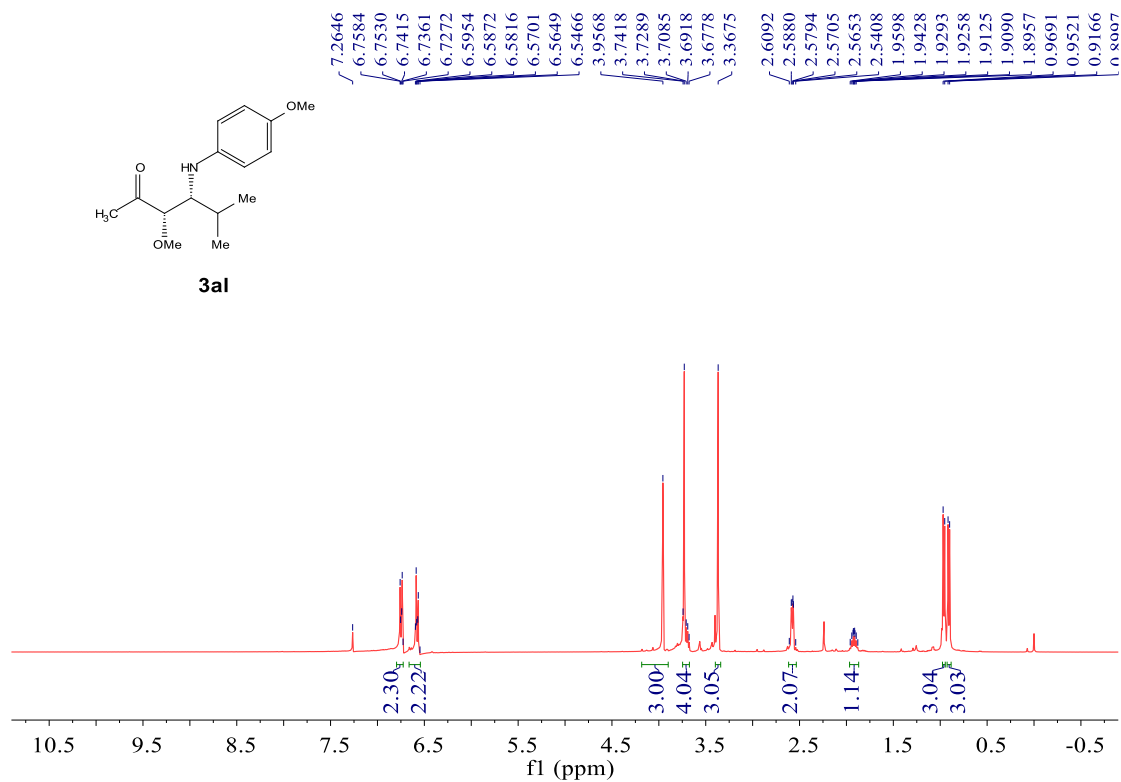

### <sup>13</sup>C NMR Spectrum (101 MHz, CDCl<sub>3</sub>) of 3aI

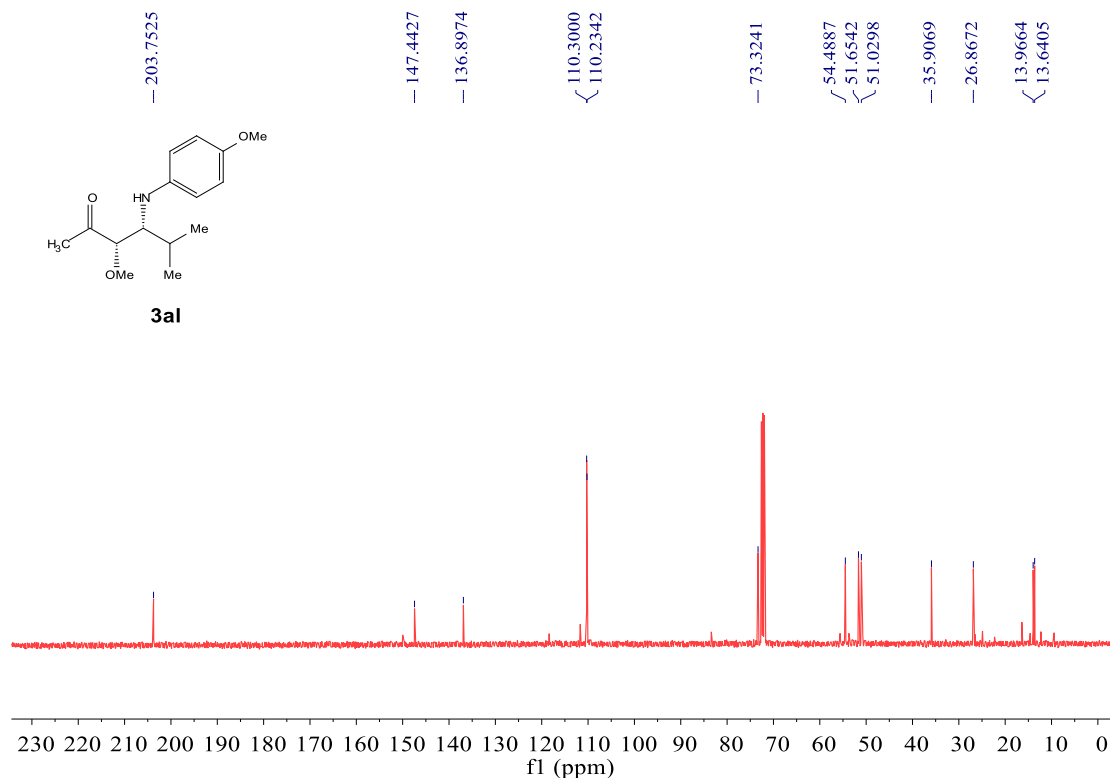

### <sup>1</sup>H NMR Spectrum (400 MHz, CDCl<sub>3</sub>) of 3am

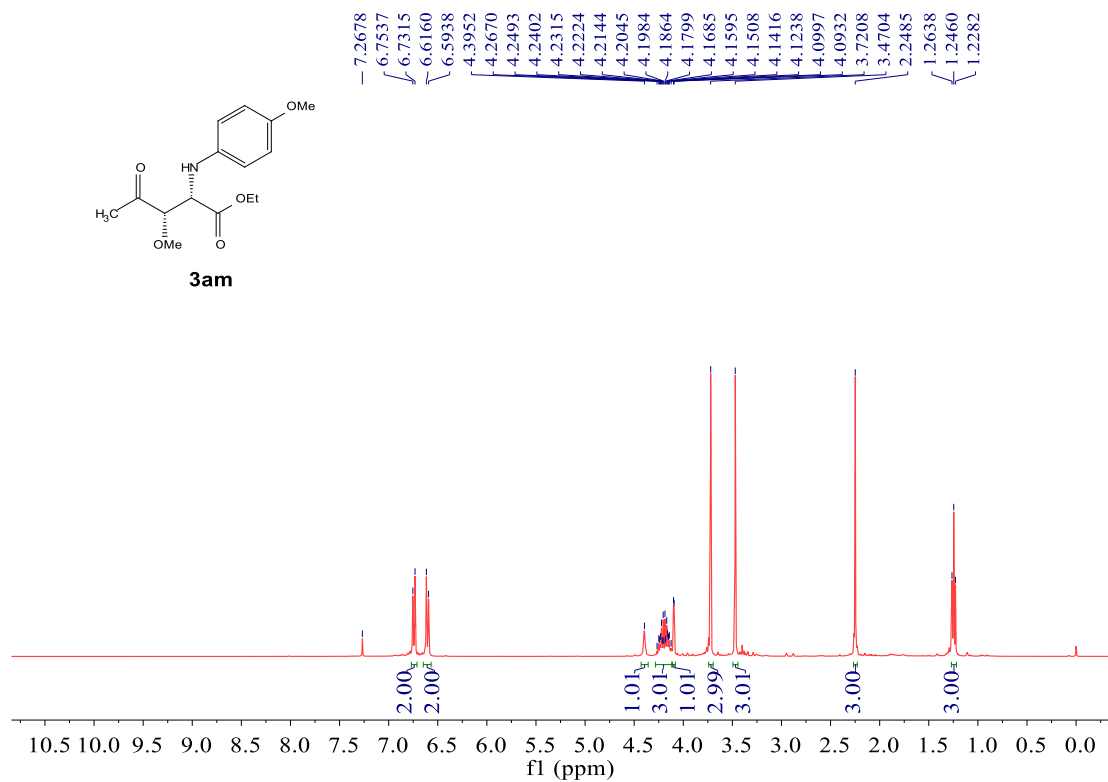

### <sup>13</sup>C NMR Spectrum (101 MHz, CDCl<sub>3</sub>) of 3am

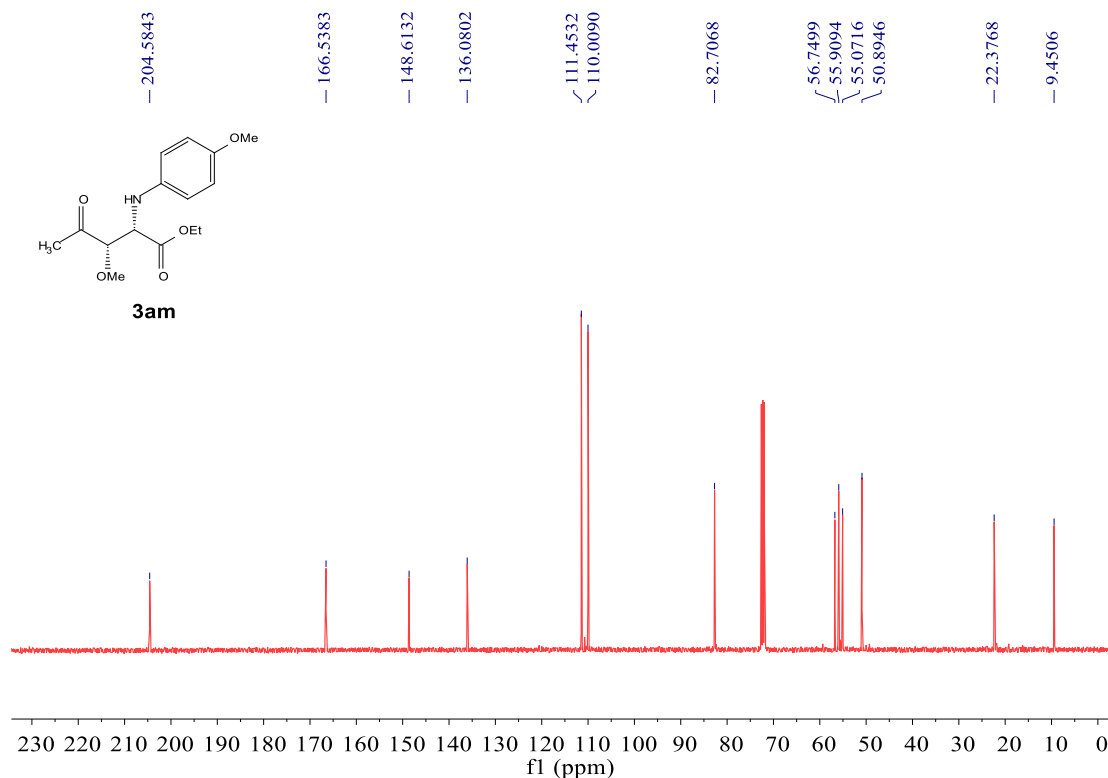

### <sup>1</sup>H NMR Spectrum (600 MHz, CDCl<sub>3</sub>) of 4a

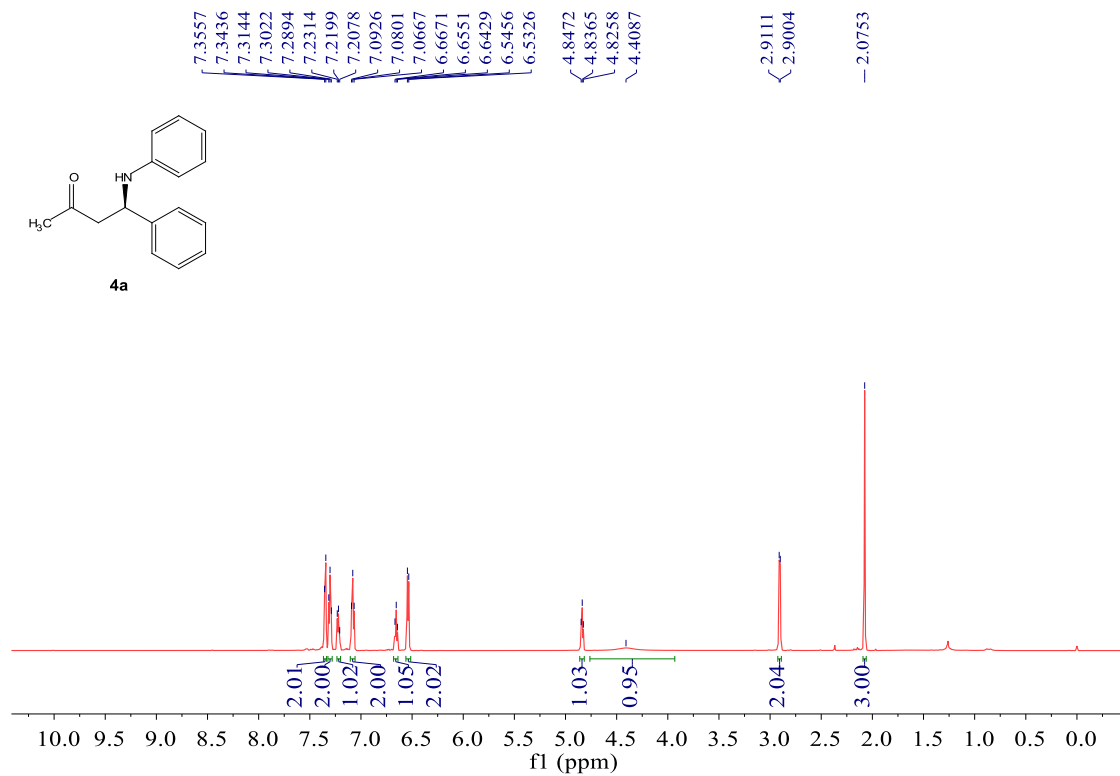

### <sup>13</sup>C NMR Spectrum (151 MHz, CDCl<sub>3</sub>) of 4a

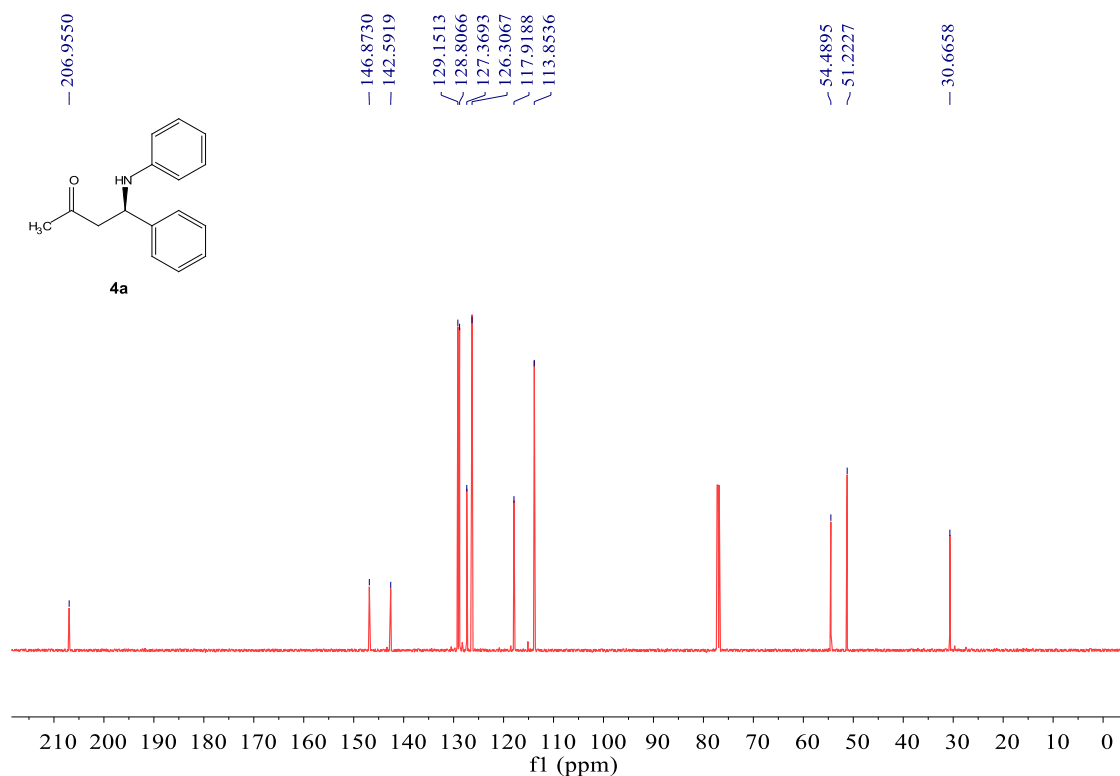

### <sup>1</sup>H NMR Spectrum (600 MHz, CDCl<sub>3</sub>) of 4b

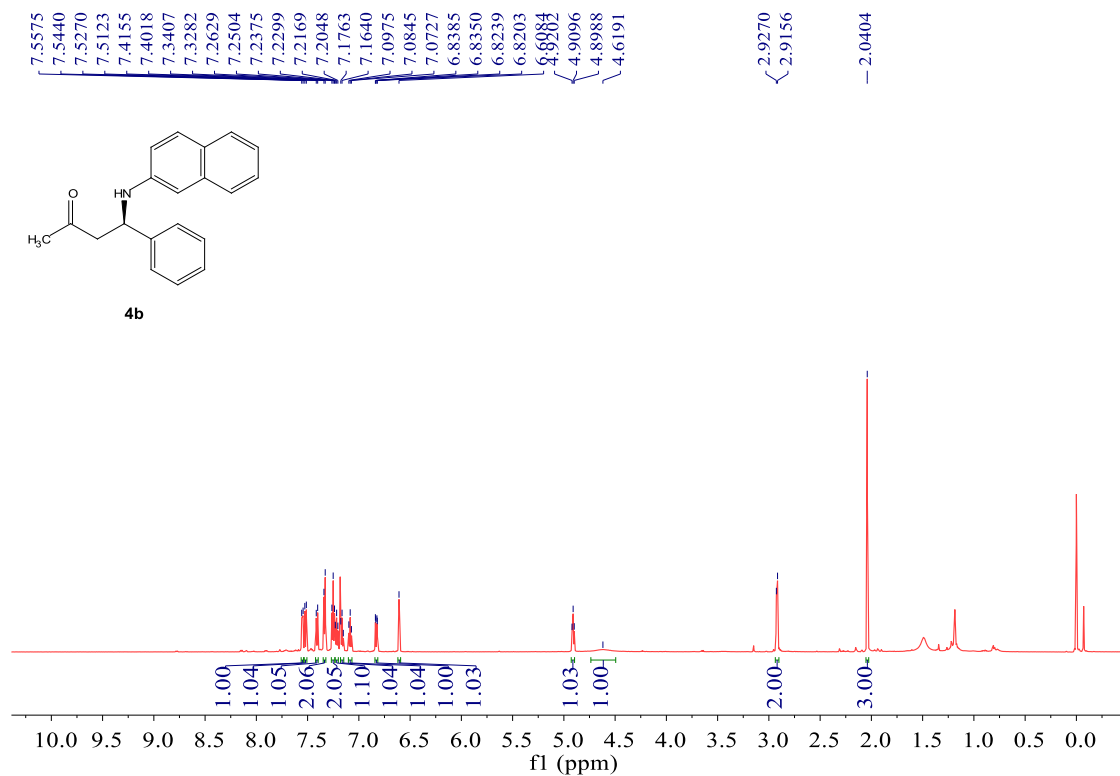

### <sup>13</sup>C NMR Spectrum (151 MHz, CDCl<sub>3</sub>) of 4b

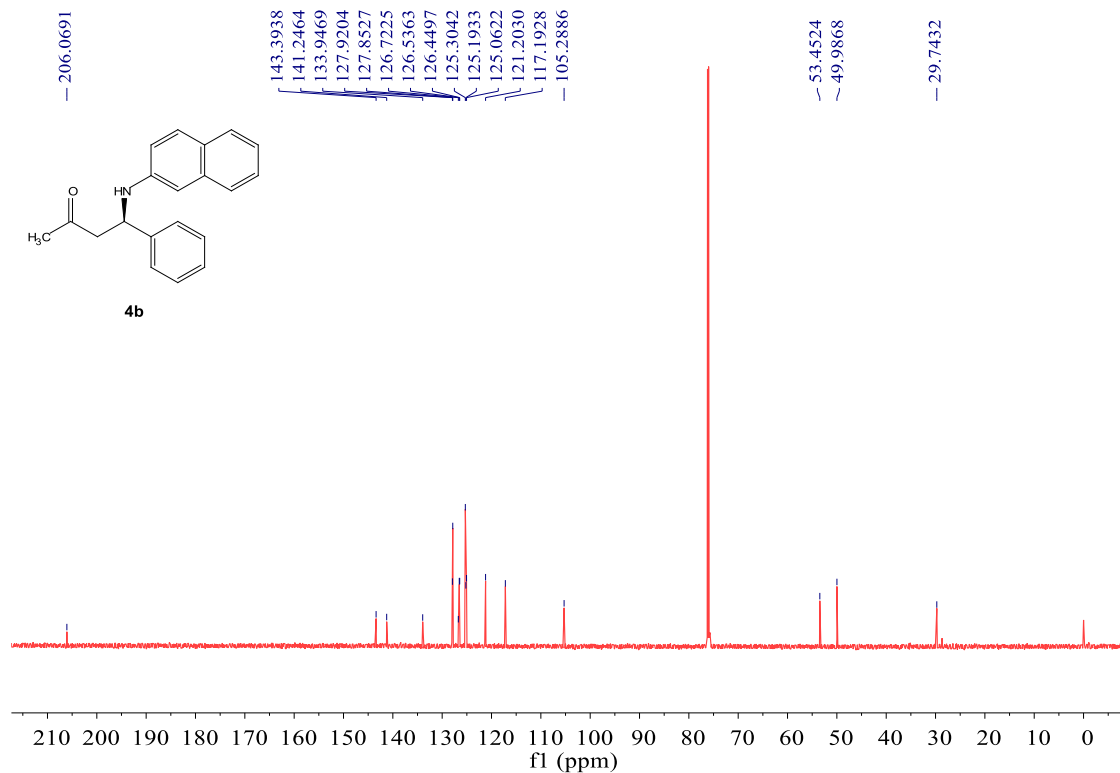

### <sup>1</sup>H NMR Spectrum (600 MHz, CDCl<sub>3</sub>) of 4c and 4d

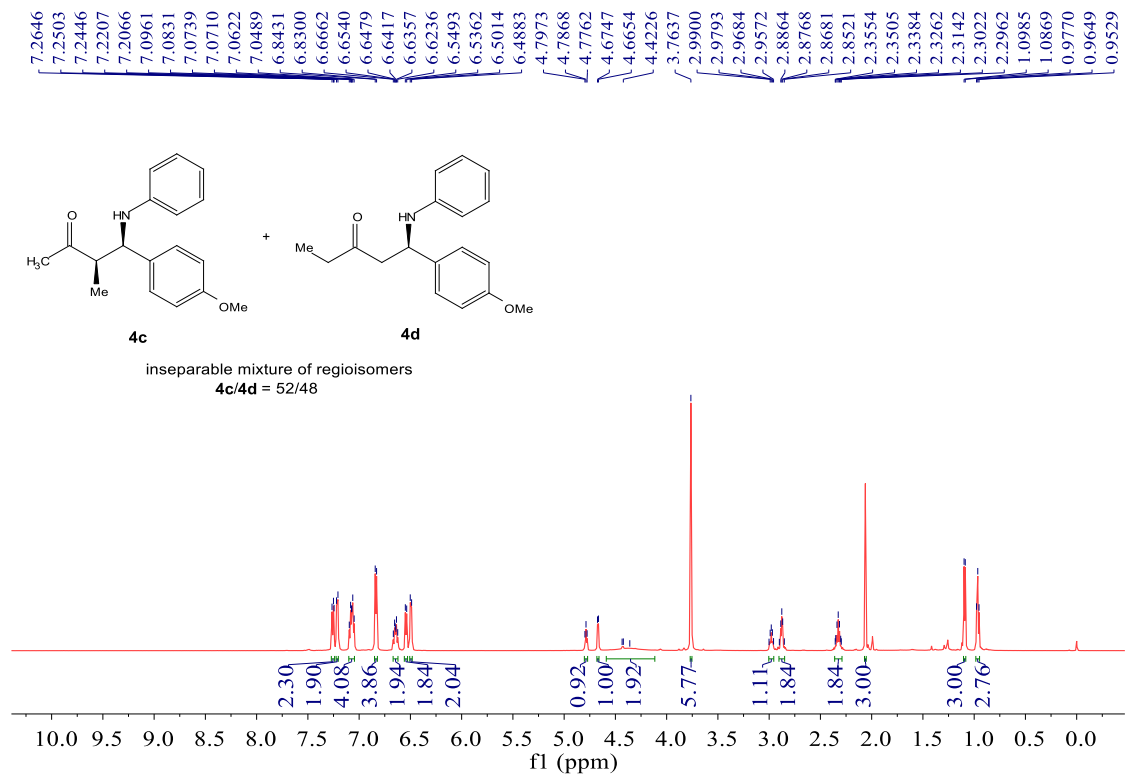

### <sup>13</sup>C NMR Spectrum (151 MHz, CDCl<sub>3</sub>) of 4c and 4d

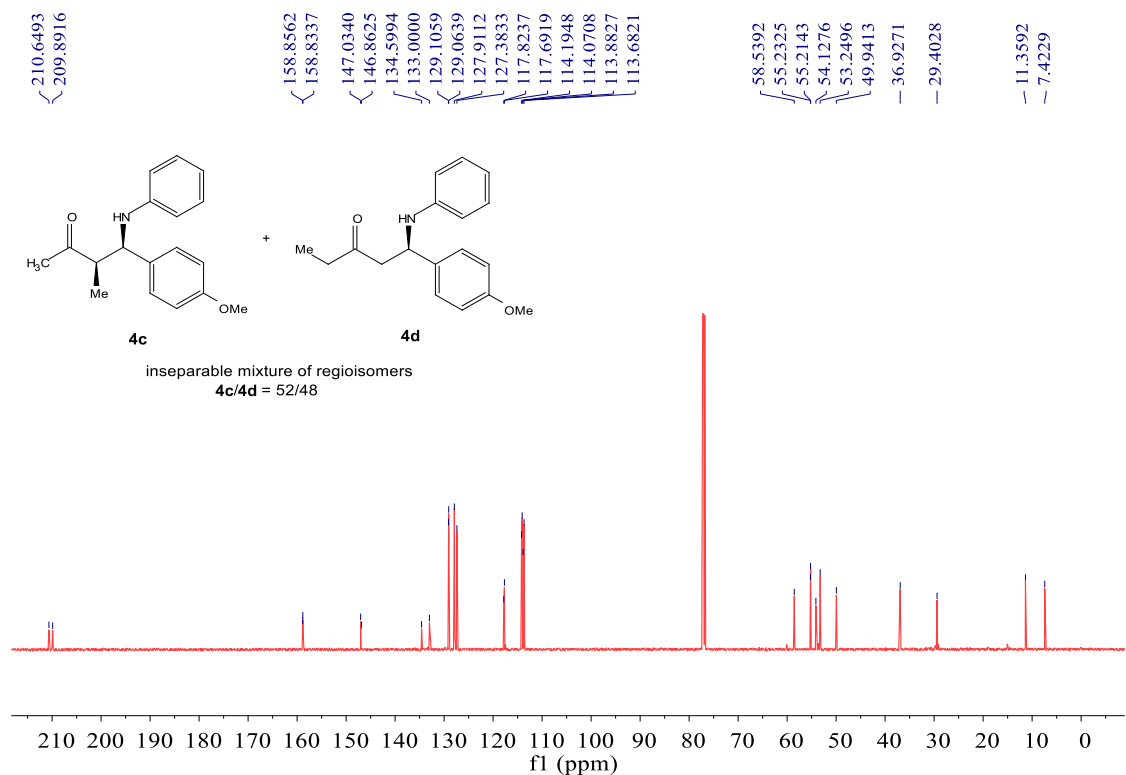

### <sup>1</sup>H NMR Spectrum (400 MHz, CDCl<sub>3</sub>) of 4e

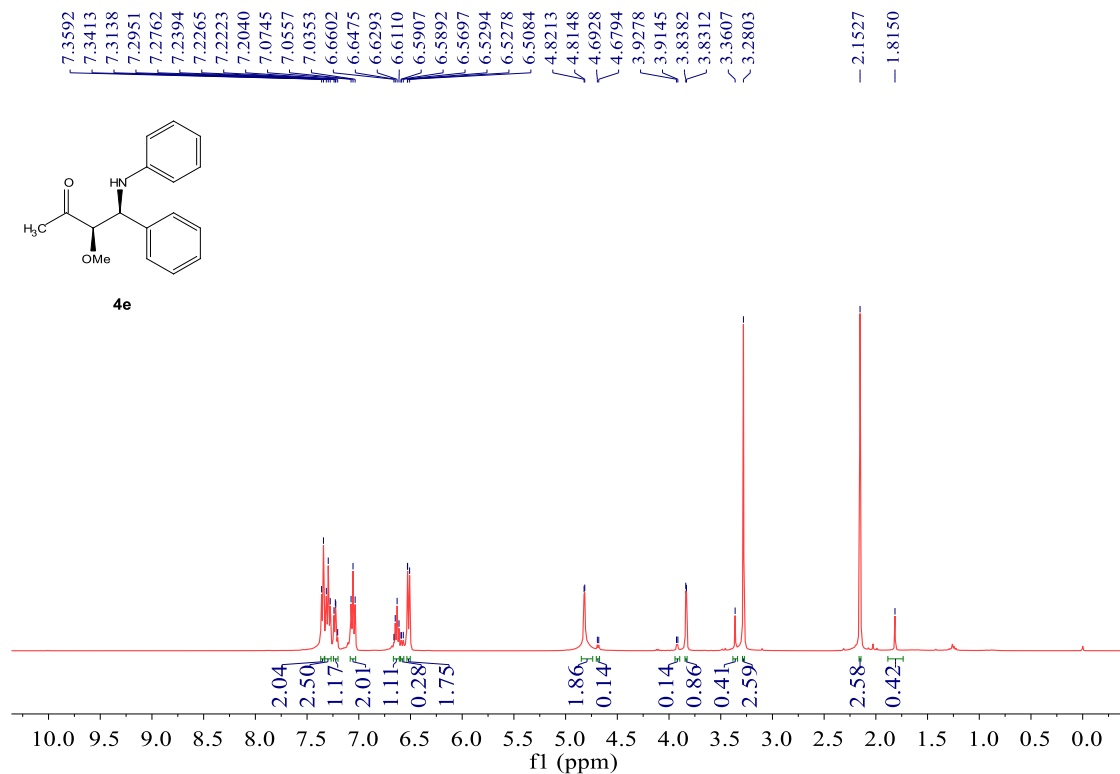

### <sup>13</sup>C NMR Spectrum (101 MHz, CDCl<sub>3</sub>) of 4e

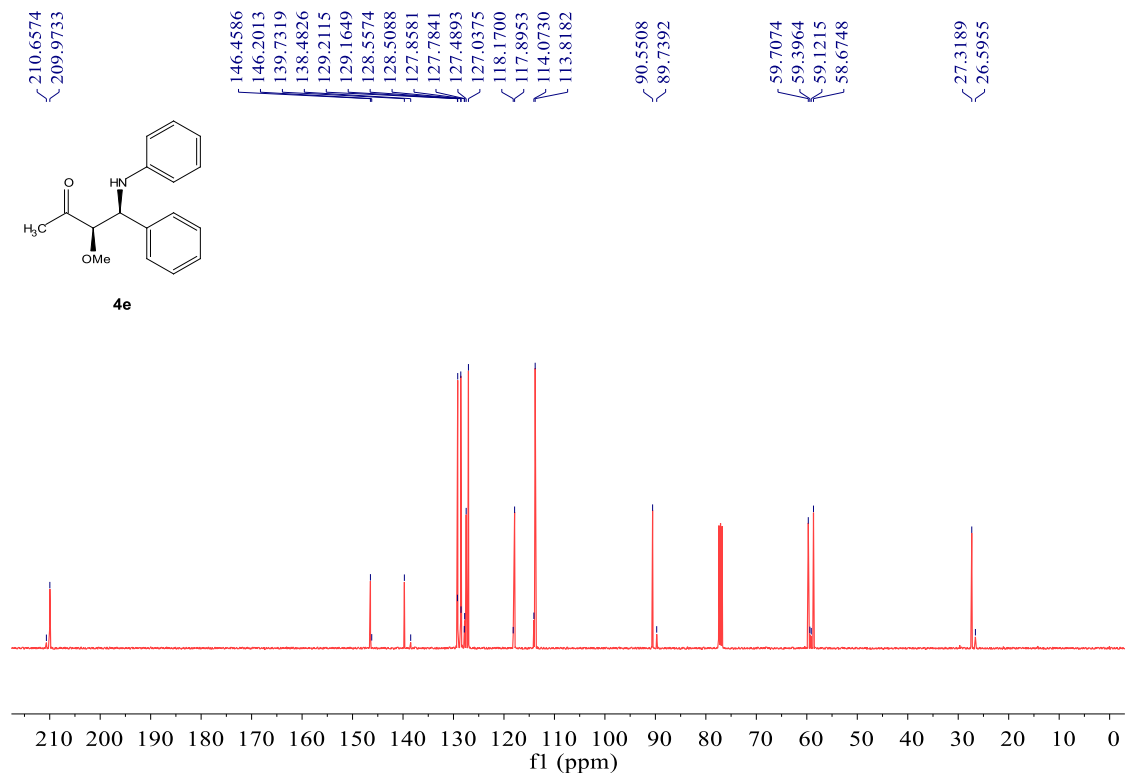

### <sup>1</sup>H NMR Spectrum (600 MHz, CDCl<sub>3</sub>) of 4f

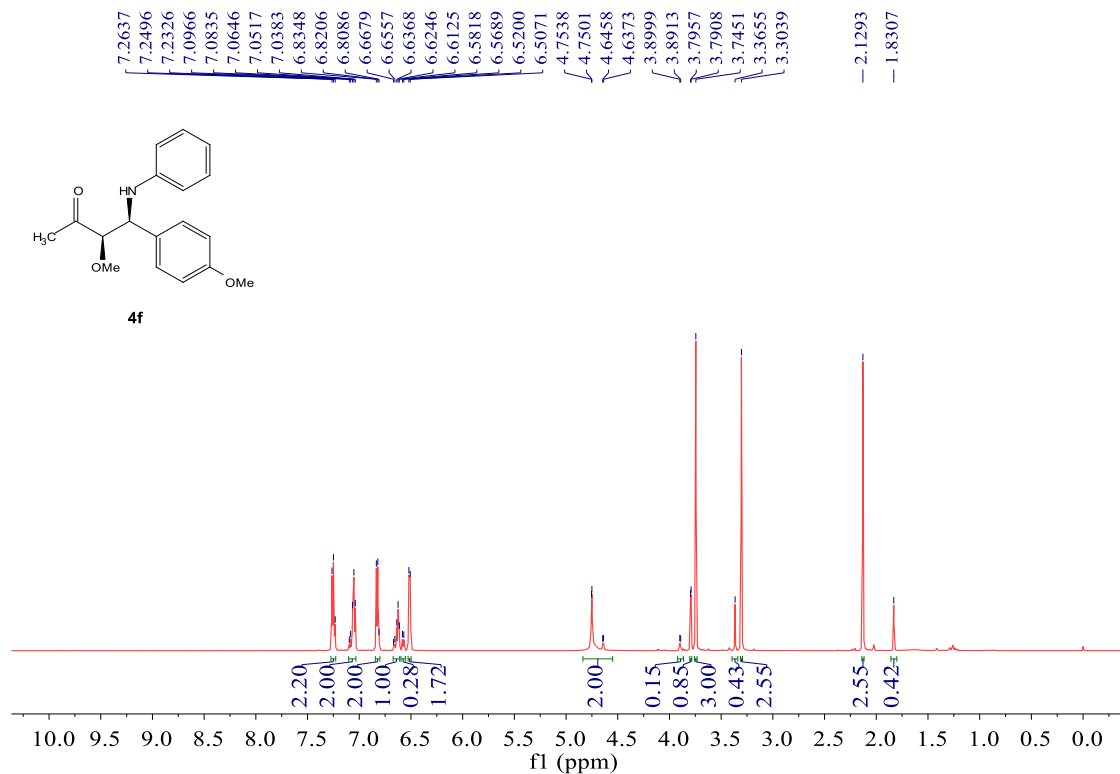

### <sup>13</sup>C NMR Spectrum (151 MHz, CDCl<sub>3</sub>) of 4f

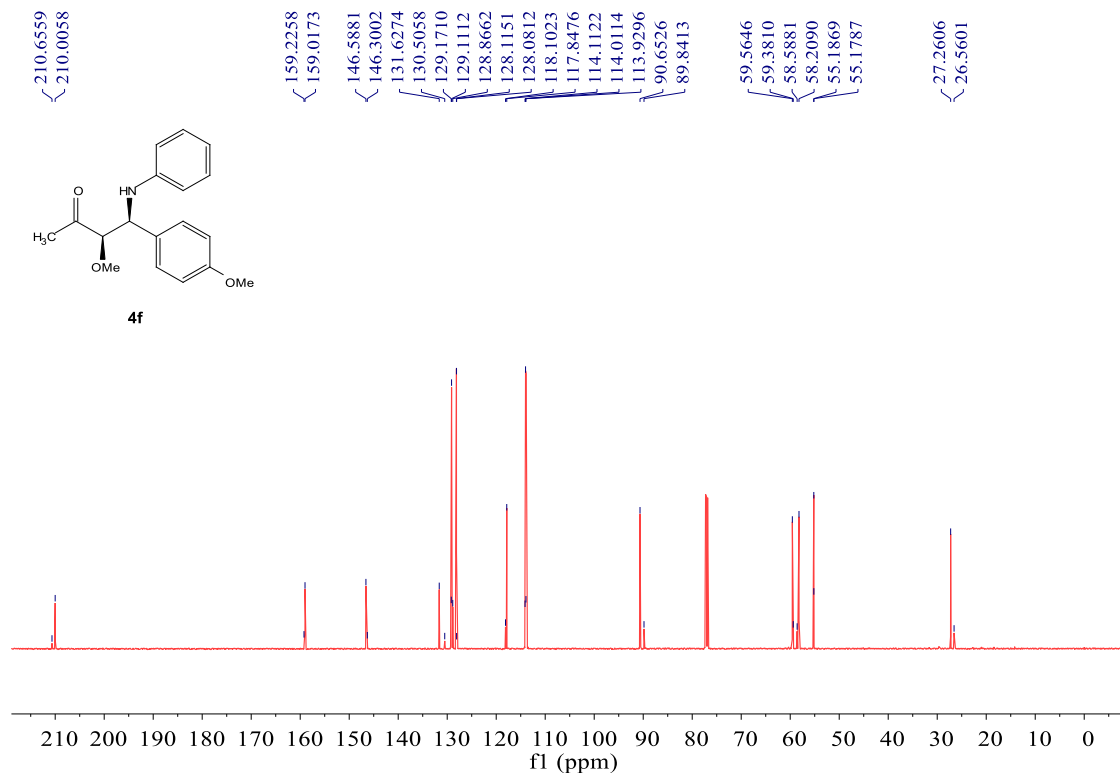



### <sup>1</sup>H NMR Spectrum (400 MHz, CDCl<sub>3</sub>) of 4g

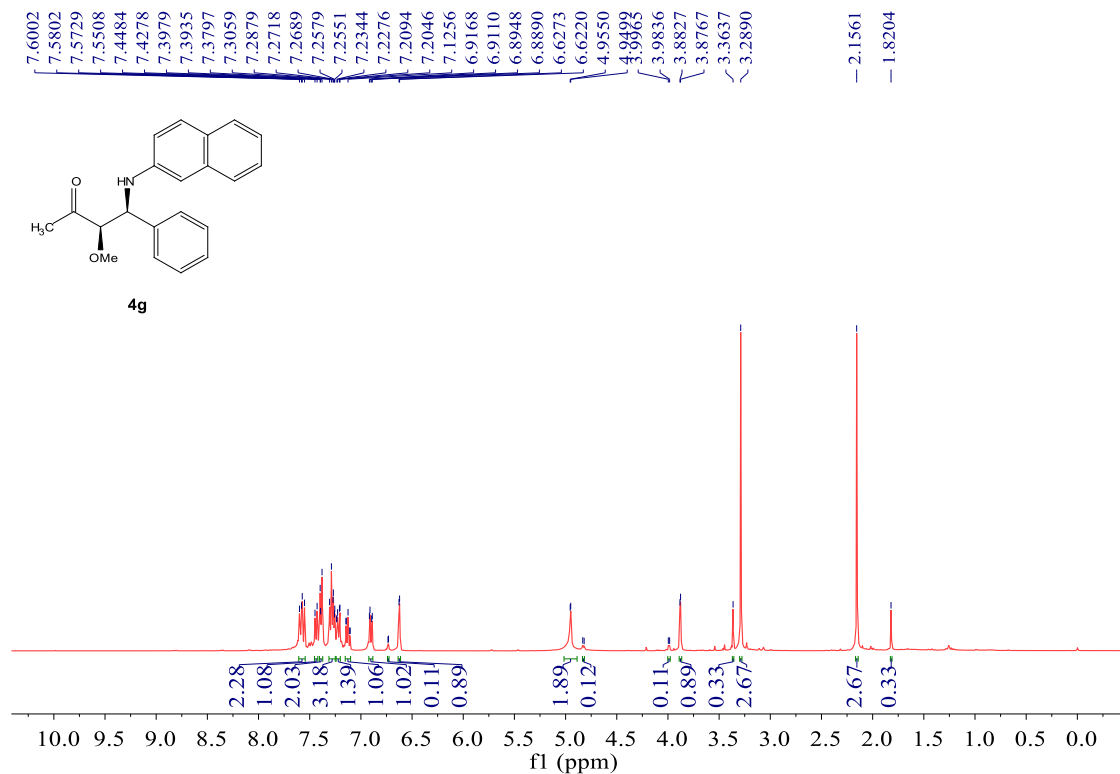

### <sup>13</sup>C NMR Spectrum (101 MHz, CDCl<sub>3</sub>) of 4g

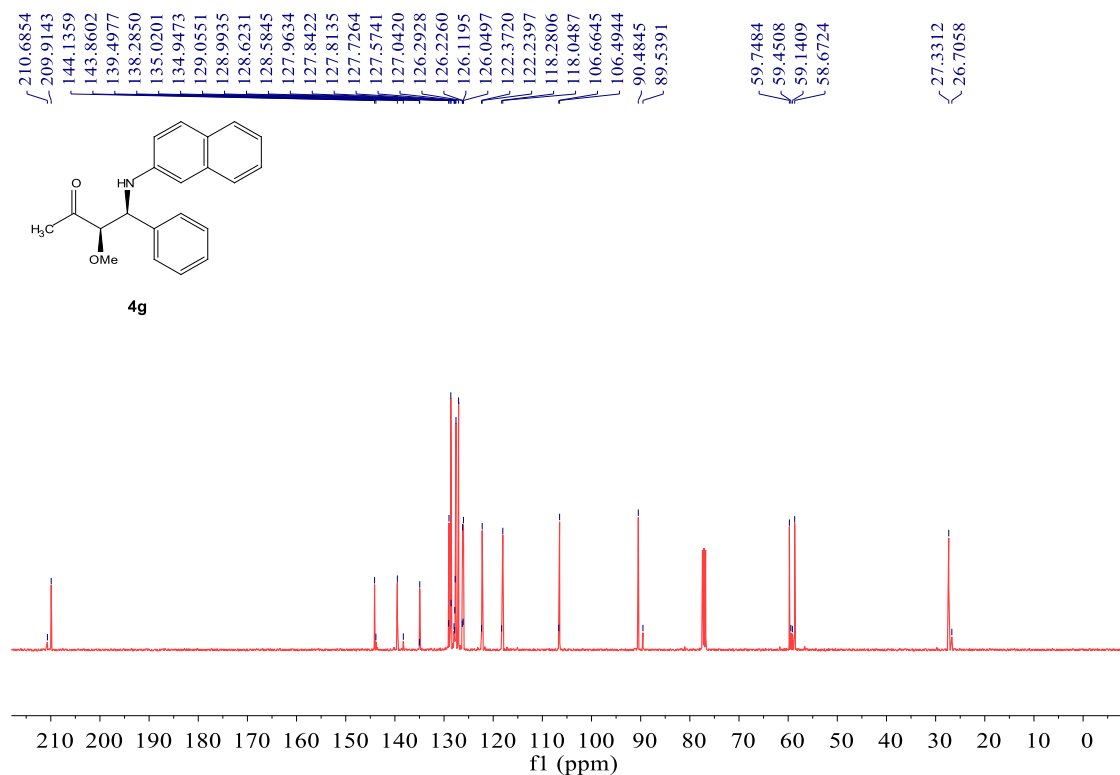

## 15. HRMS spectra

### HRMS spectrum of 3b

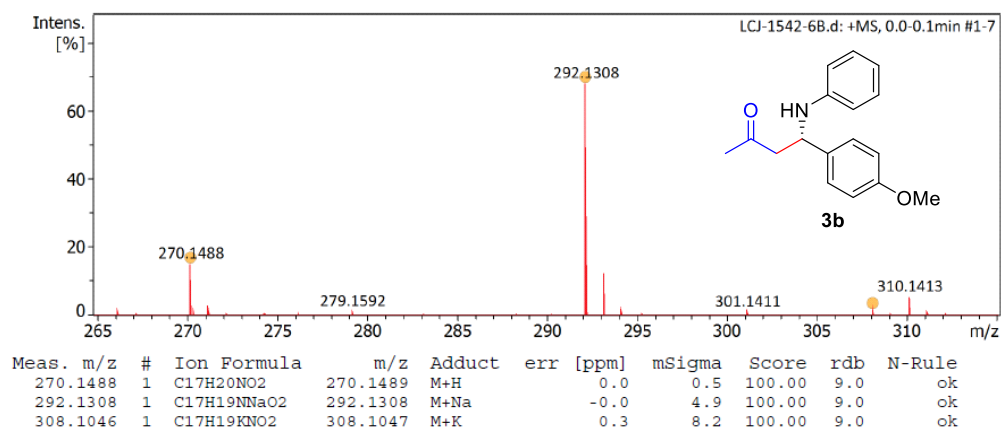

### HRMS spectrum of 3c

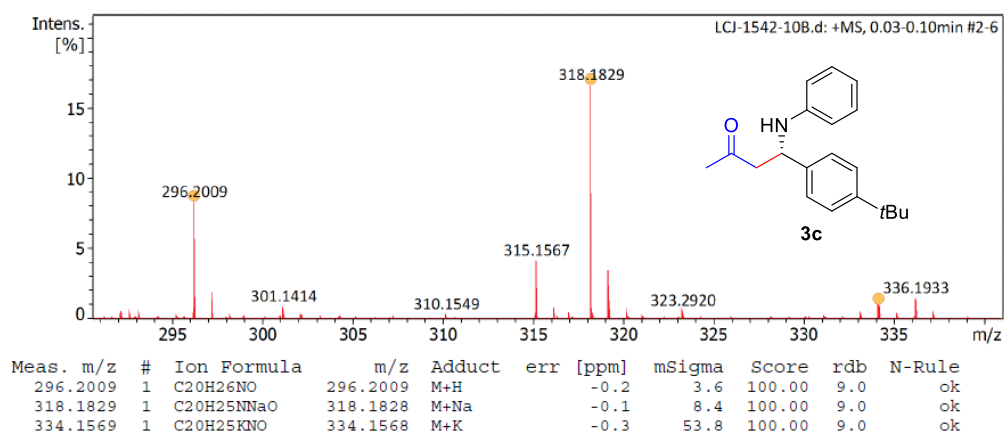

### HRMS spectrum of 3e

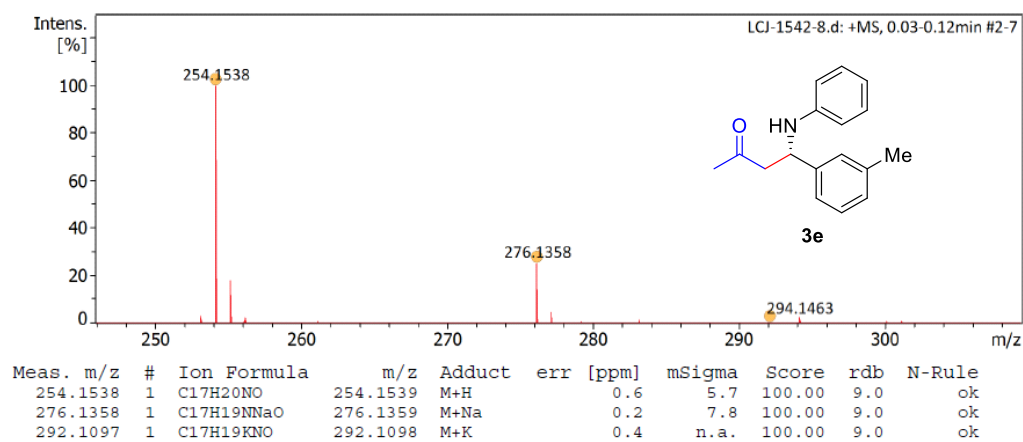

### HRMS spectrum of 3f

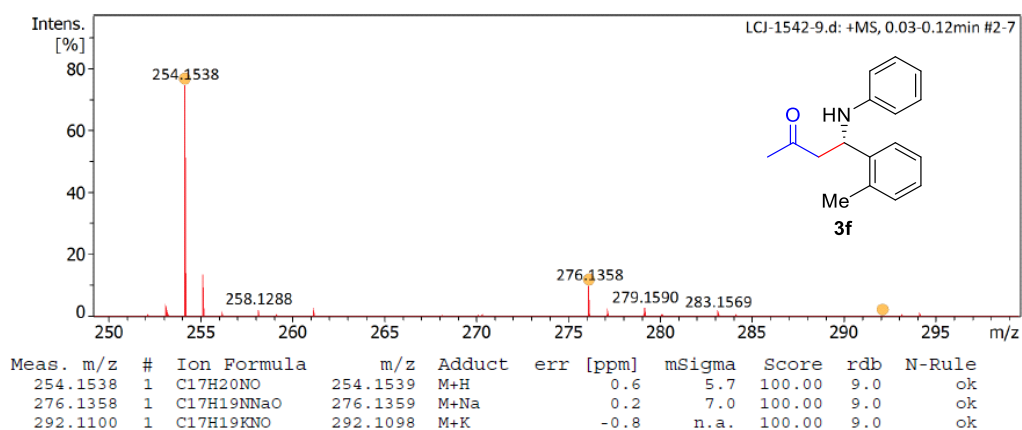

### HRMS spectrum of 3g

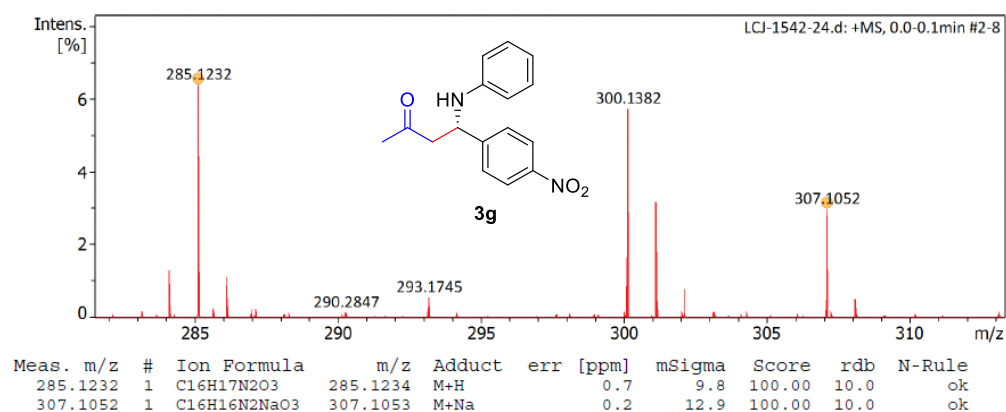

### HRMS spectrum of 3h

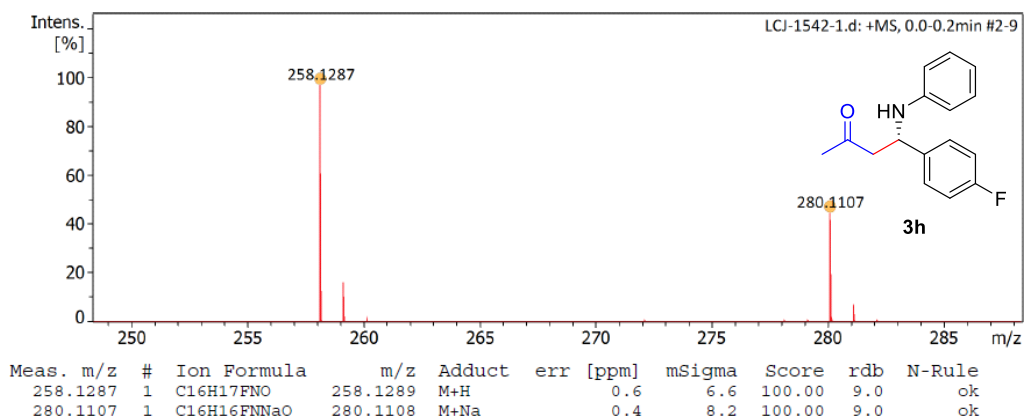

### HRMS spectrum of 3j

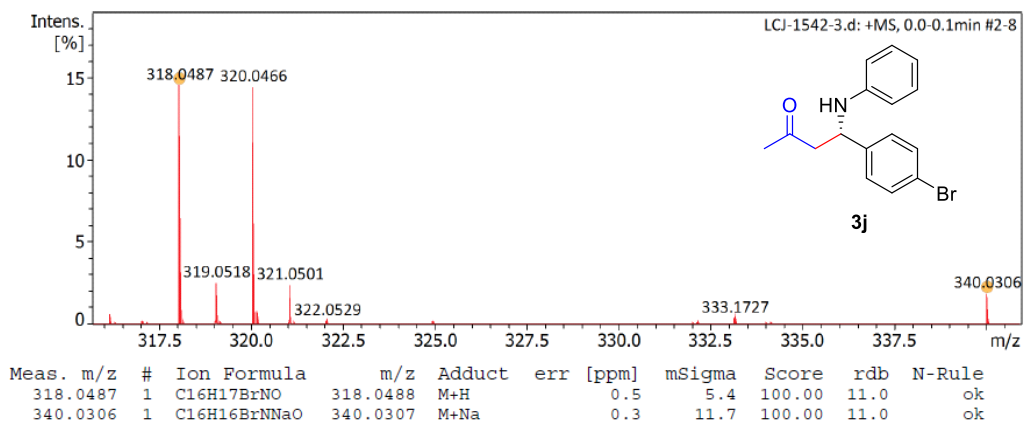

### HRMS spectrum of 3k

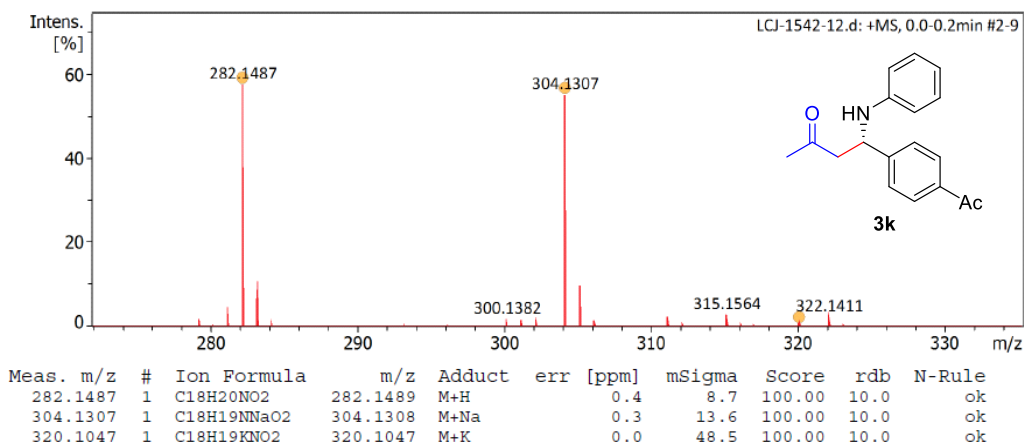

### HRMS spectrum of 3l

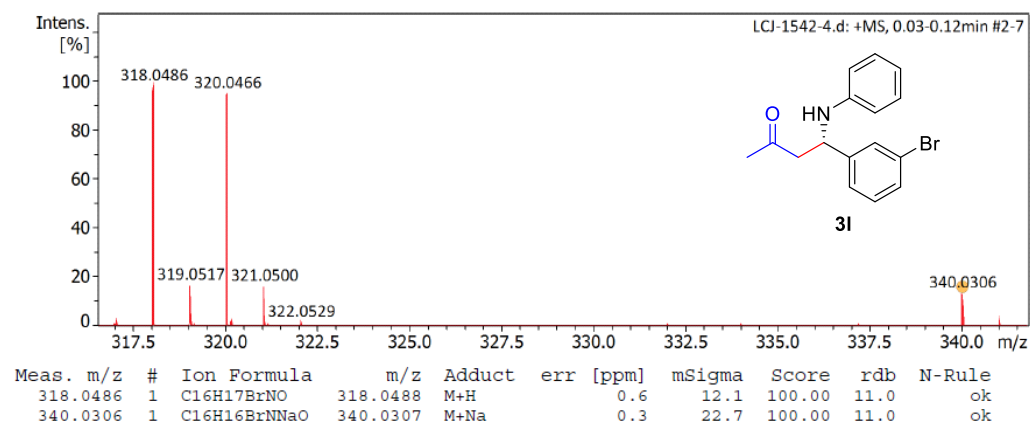

### HRMS spectrum of 3m

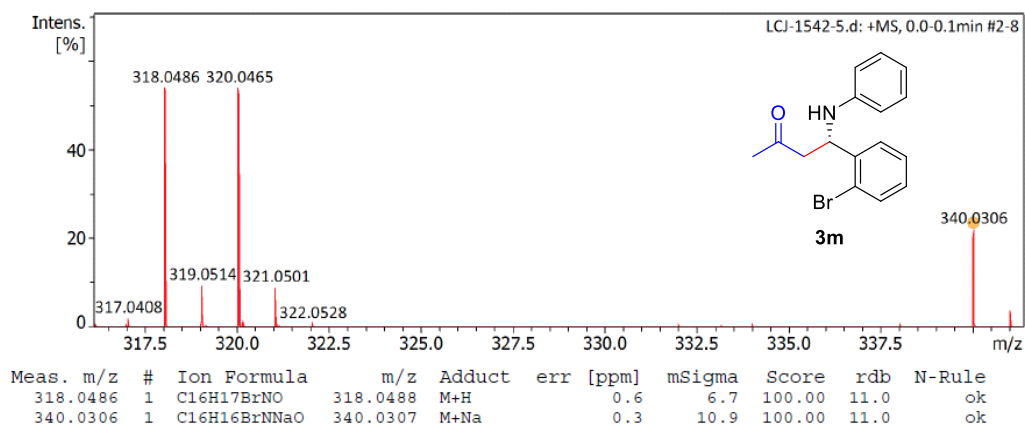

### HRMS spectrum of 3n

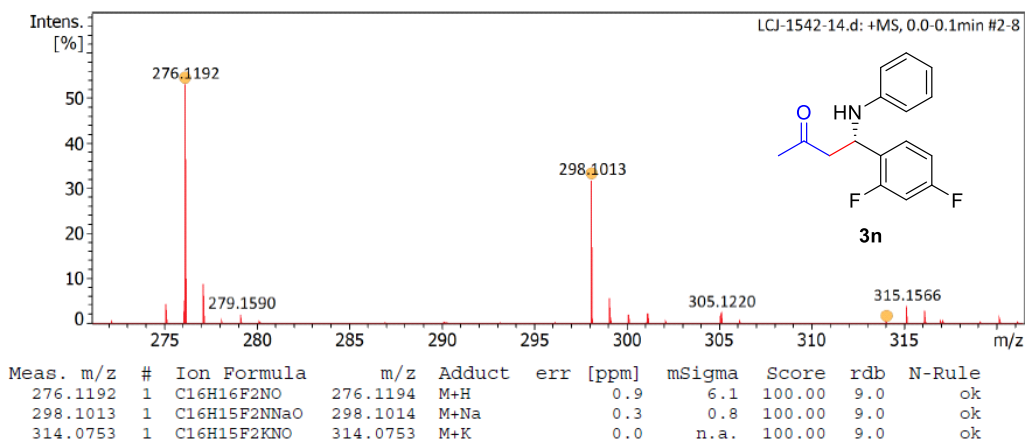

### HRMS spectrum of 3o

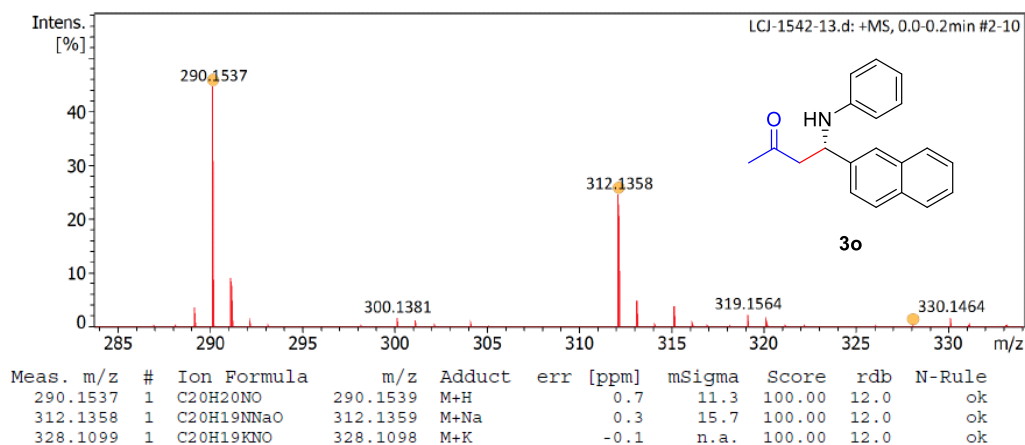

### HRMS spectrum of 3r

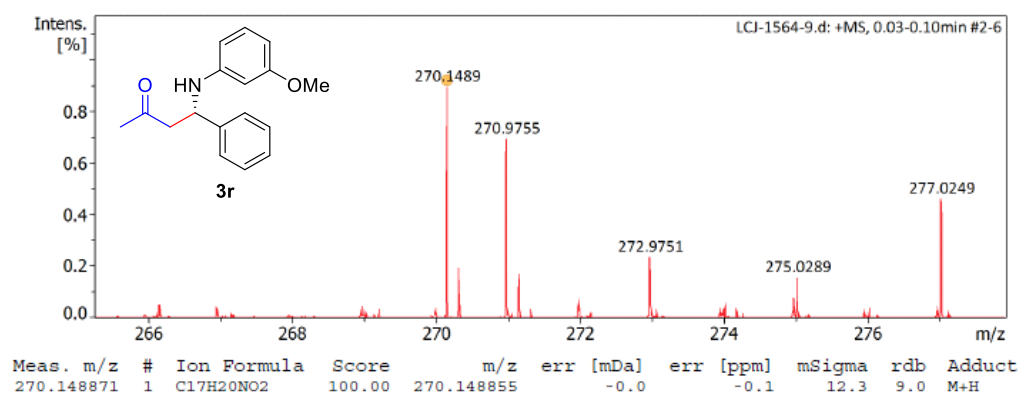

### HRMS spectrum of 3t

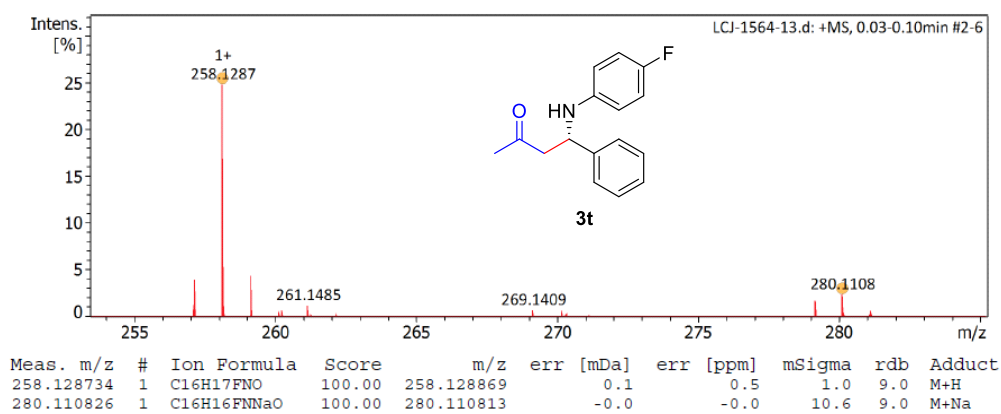

### HRMS spectrum of 3v

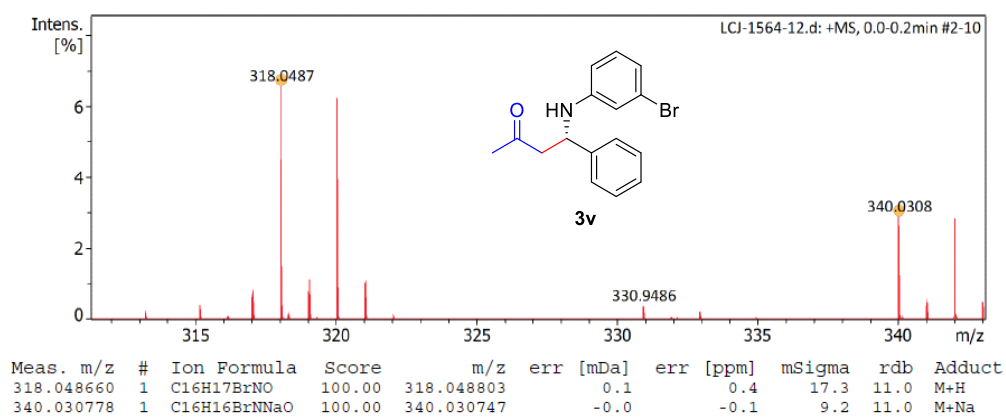

### HRMS spectrum of 3w

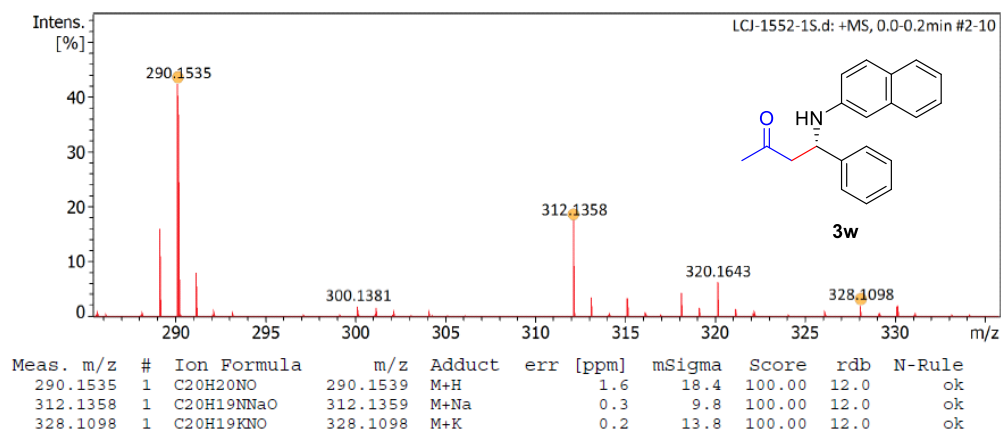

### HRMS spectrum of 3x and 3y

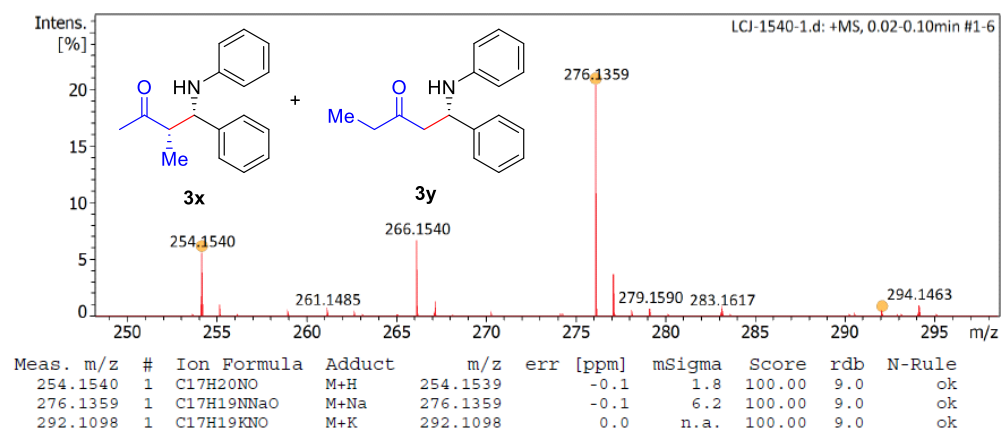

### HRMS spectrum of 3z and 3aa

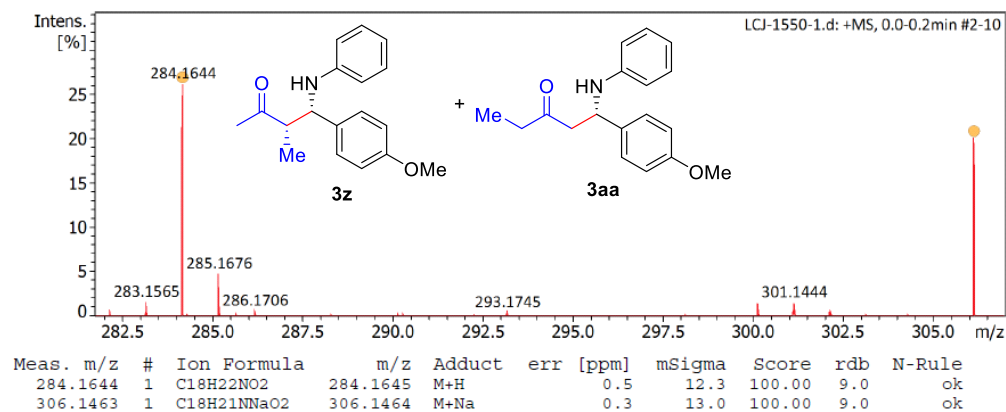

### HRMS spectrum of 3ad

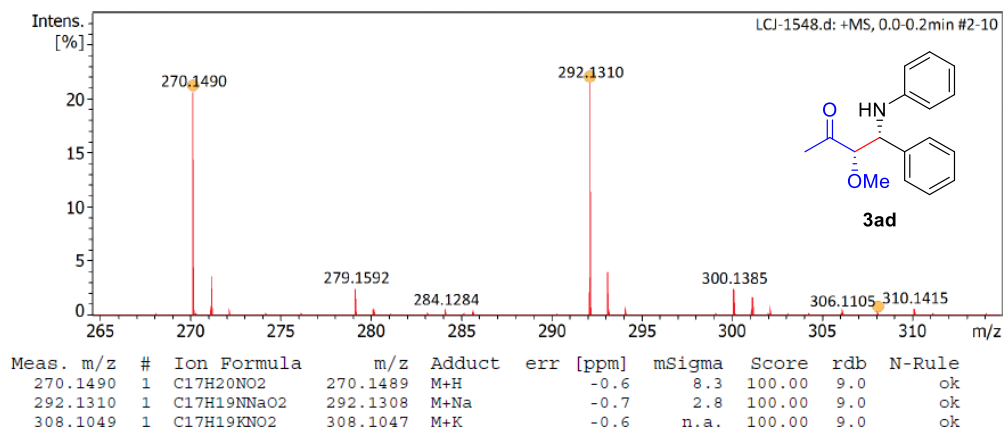

### HRMS spectrum of 3ae

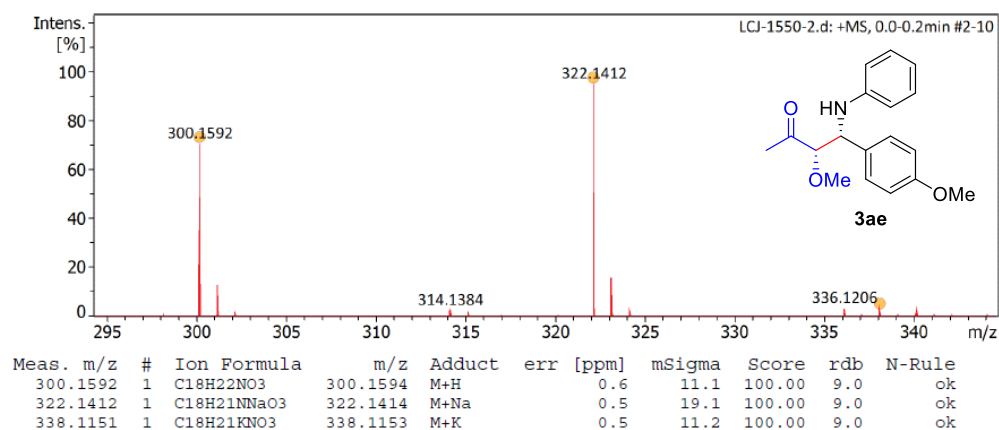

### HRMS spectrum of 3af

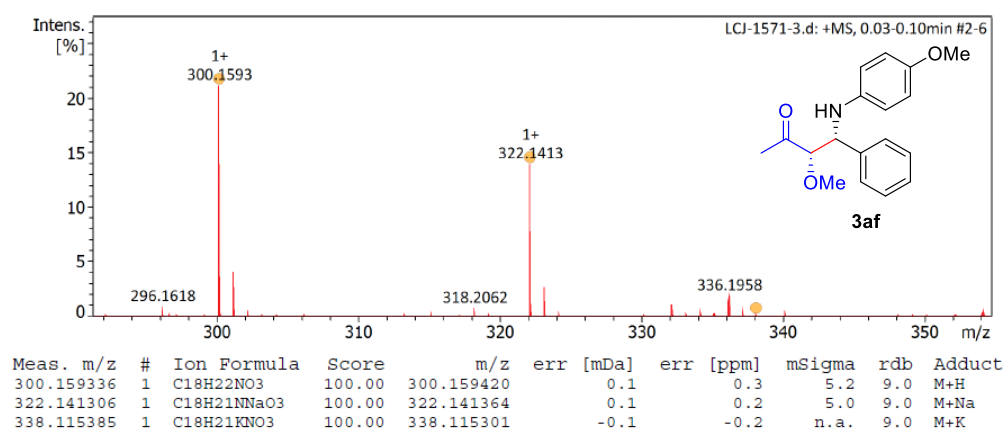



### HRMS spectrum of 3ag

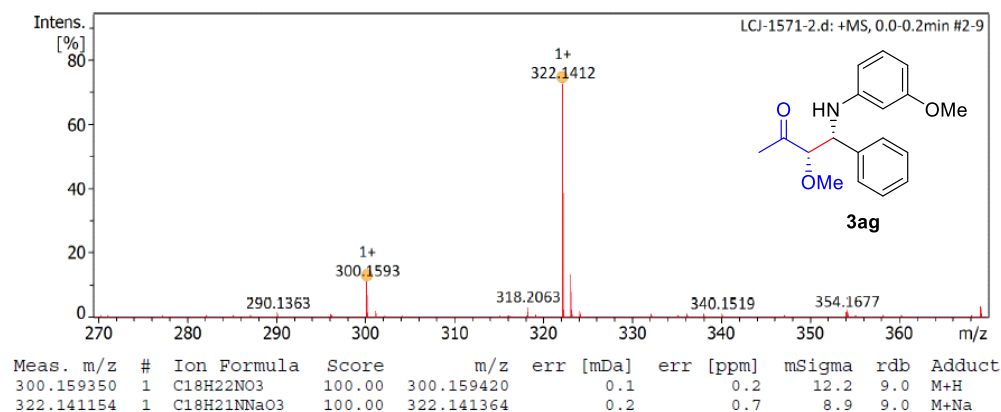

### HRMS spectrum of 3ah

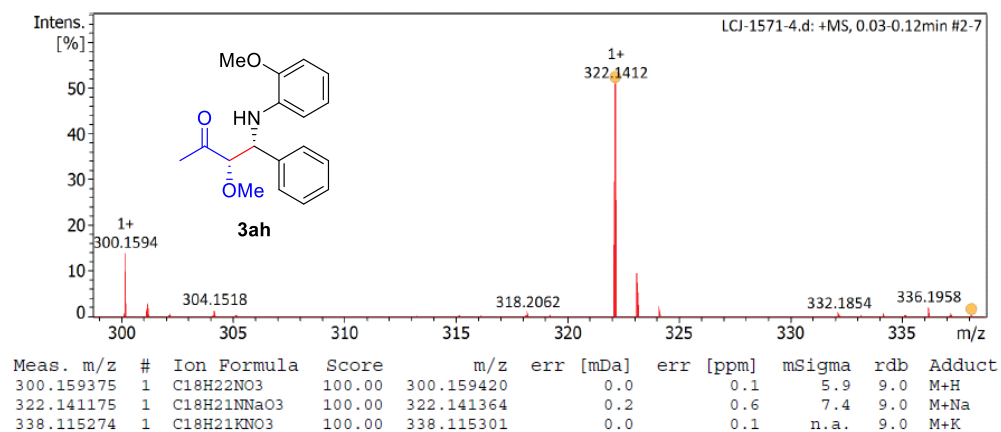

### HRMS spectrum of 3ai

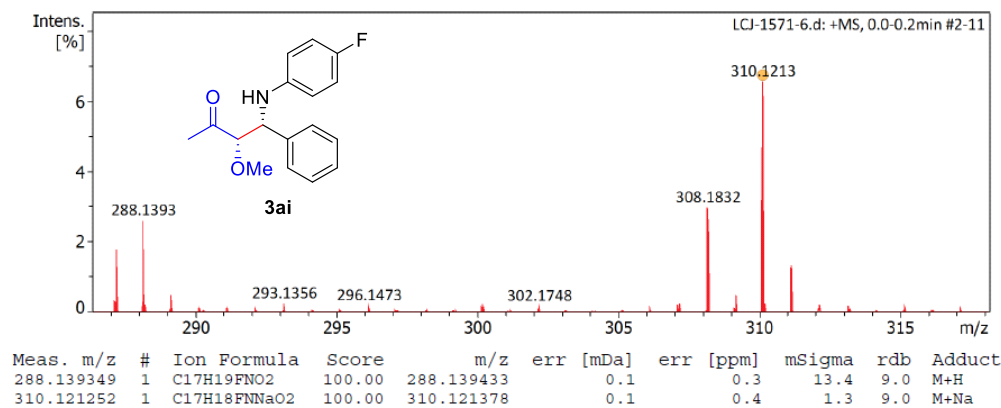

### HRMS spectrum of 3aj

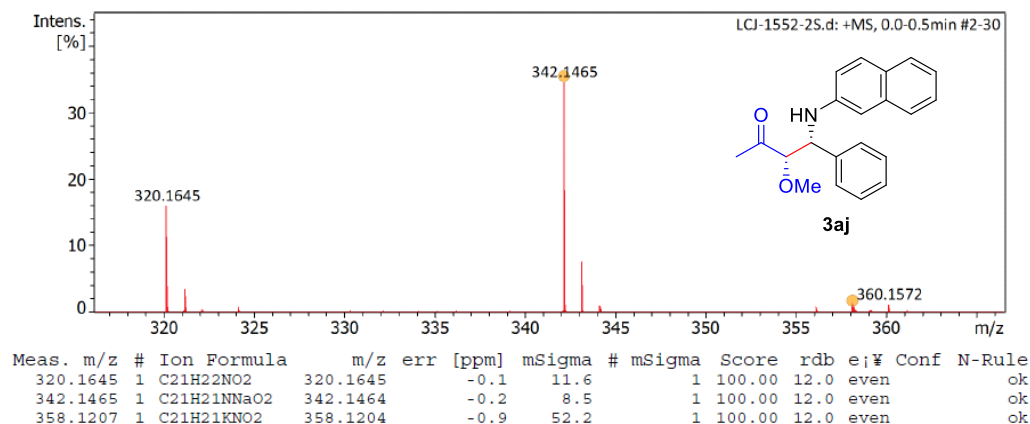

### HRMS spectrum of 3ak

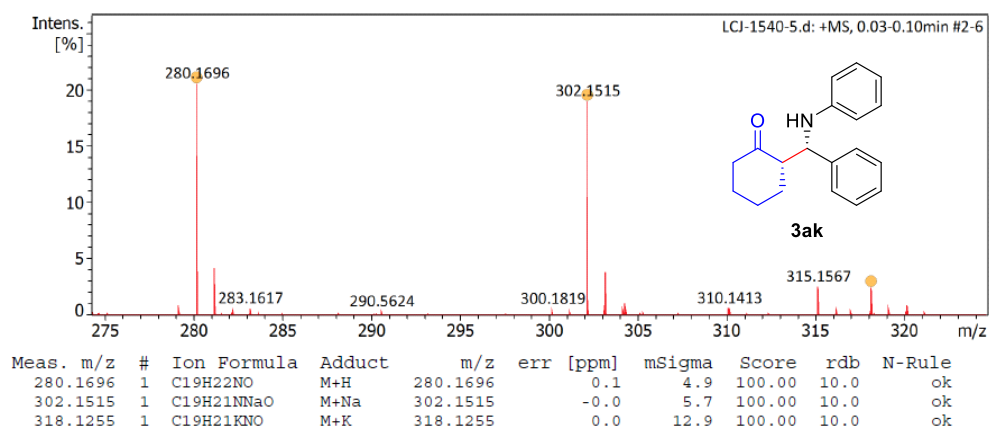

### HRMS spectrum of 3al

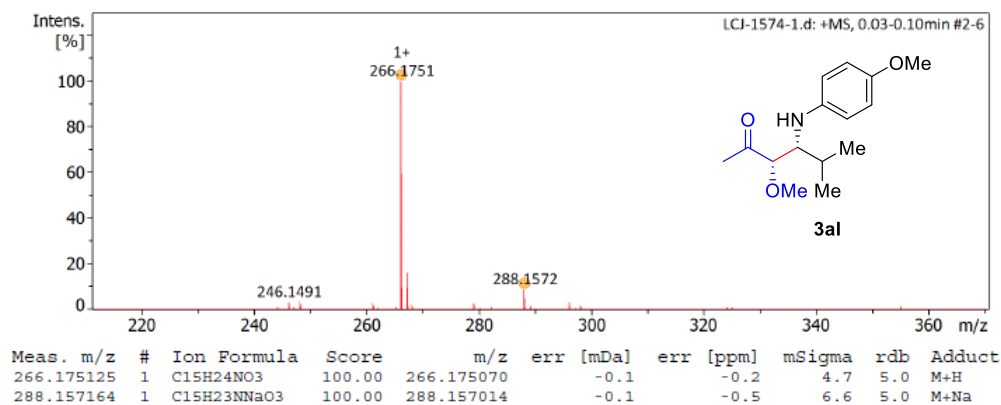

### HRMS spectrum of 4b

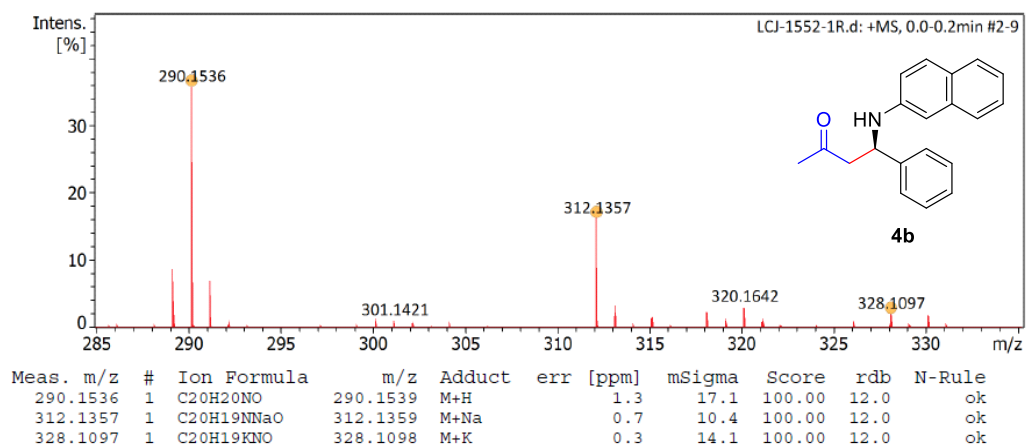

### HRMS spectrum of 4c and 4d

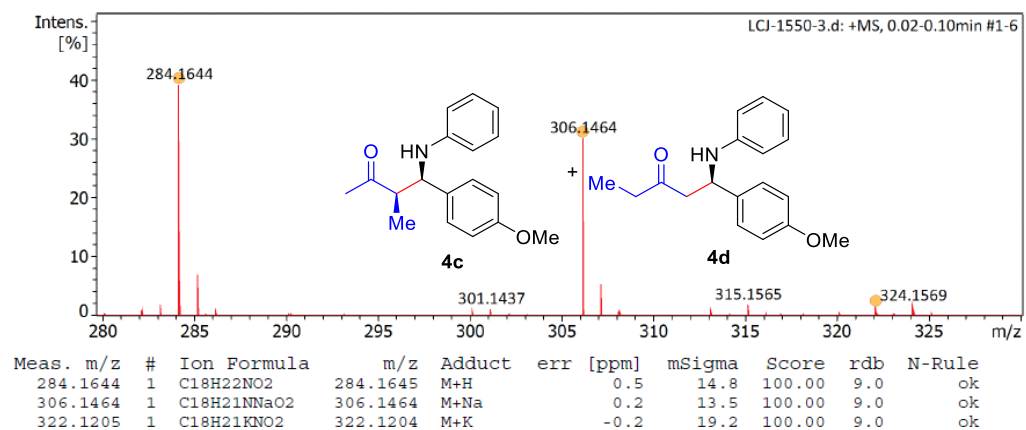

### HRMS spectrum of 4e

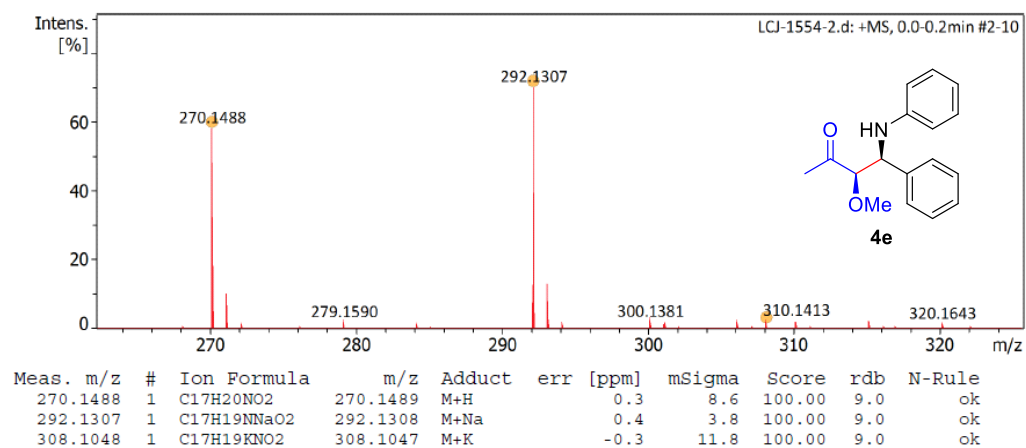

### HRMS spectrum of 4f

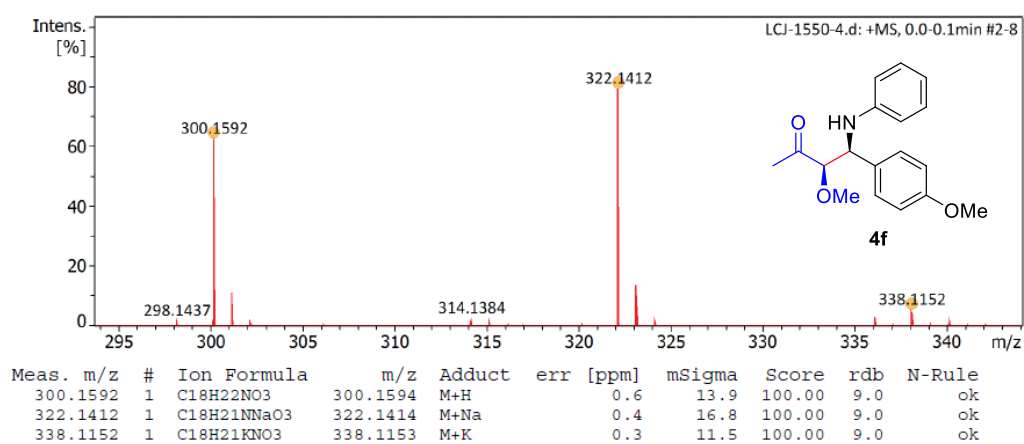

### HRMS spectrum of 4g

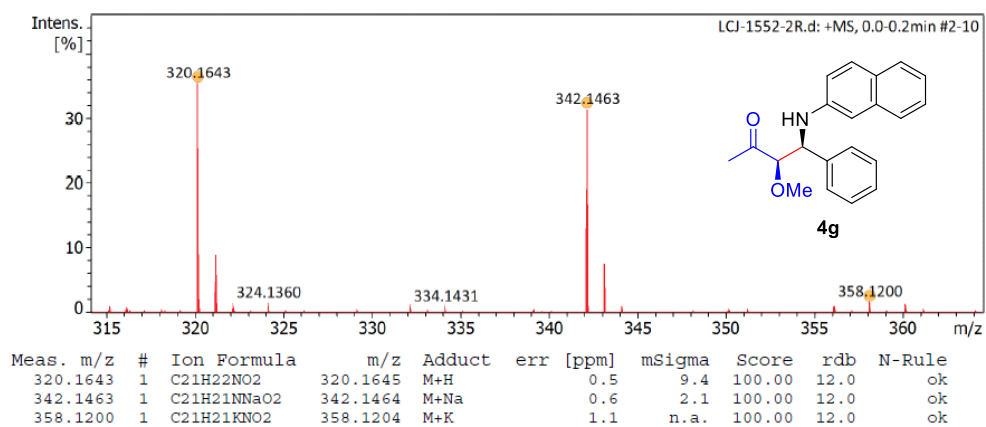

## 16. Chiral HPLC spectra

### HPLC spectrum of *Rac-3a*

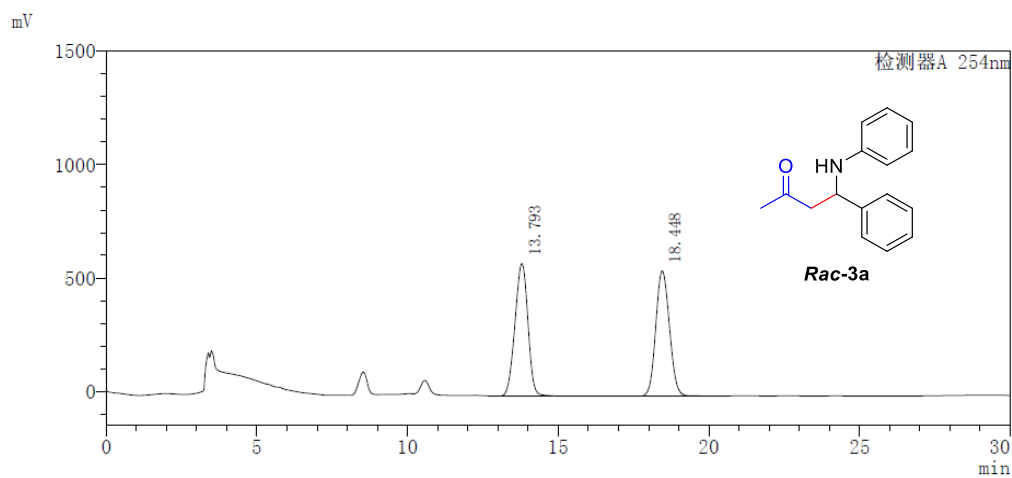

检测器A 254nm

| No. | Retention Time | Area     | Height  | Concentration |
|-----|----------------|----------|---------|---------------|
| 1   | 13.793         | 17298352 | 582071  | 49.940        |
| 2   | 18.448         | 17339828 | 550914  | 50.060        |
| 总计  |                | 34638180 | 1132986 |               |

### HPLC spectrum of *3a*

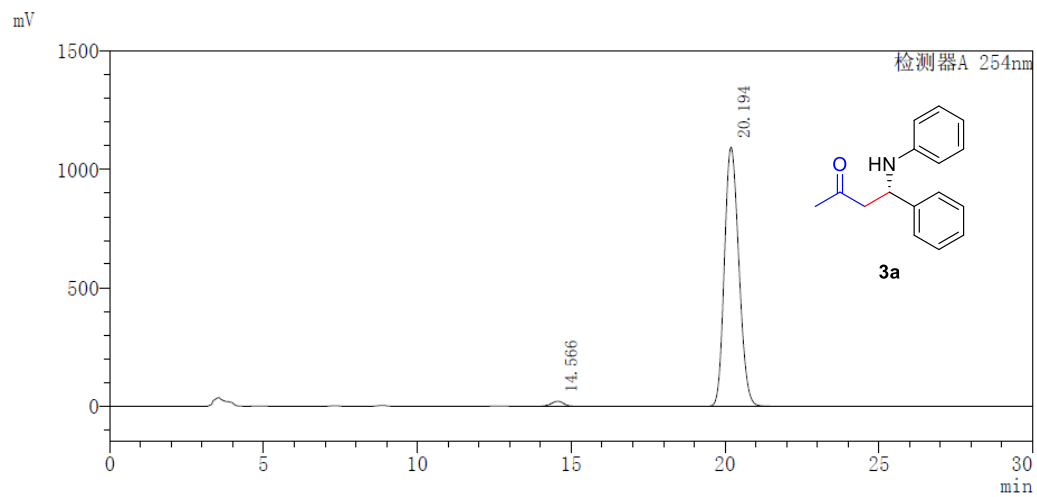

检测器A 254nm

| No. | Retention Time | Area     | Height  | Concentration |
|-----|----------------|----------|---------|---------------|
| 1   | 14.566         | 580753   | 21116   | 1.594         |
| 2   | 20.194         | 35848146 | 1094676 | 98.406        |
| 总计  |                | 36428899 | 1115793 |               |

### HPLC spectrum of *Rac-3b*

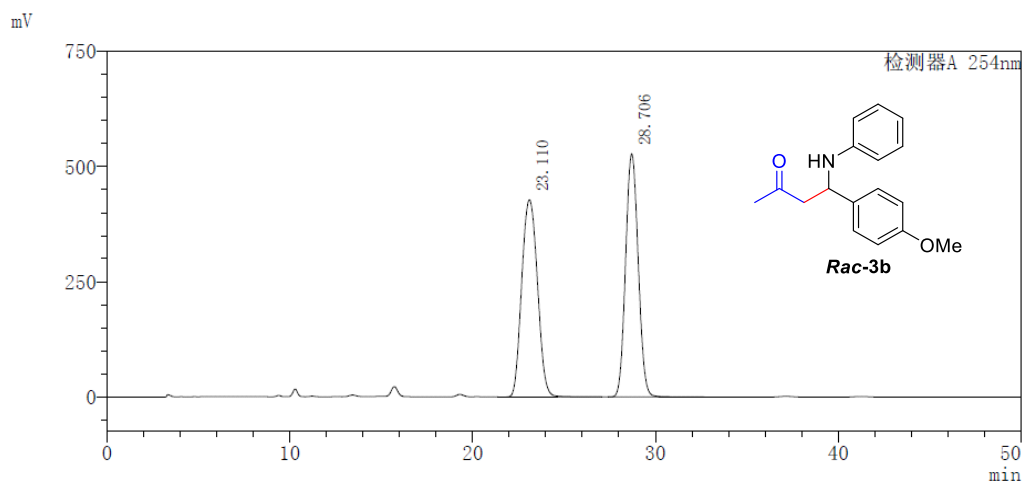

检测器A 254nm

| No. | Retention Time | Area     | Height | Concentration |
|-----|----------------|----------|--------|---------------|
| 1   | 23.110         | 25711822 | 427918 | 50.301        |
| 2   | 28.706         | 25403755 | 527540 | 49.699        |
| 总计  |                | 51115577 | 955458 |               |

### HPLC spectrum of *3b*

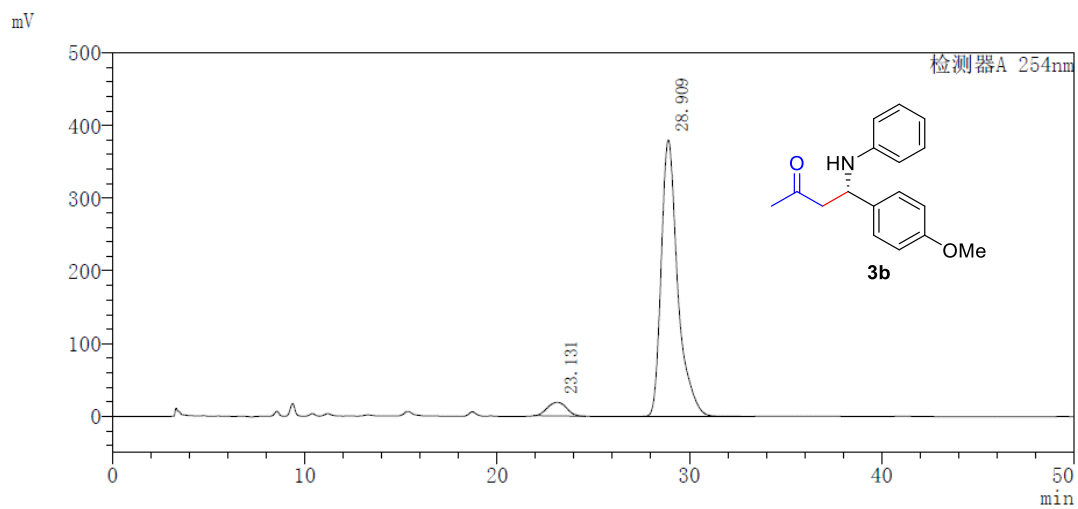

检测器A 254nm

| No. | Retention Time | Area     | Height | Concentration |
|-----|----------------|----------|--------|---------------|
| 1   | 23.131         | 1298524  | 18706  | 5.399         |
| 2   | 28.909         | 22750813 | 380107 | 94.601        |
| 总计  |                | 24049337 | 398812 |               |

### HPLC spectrum of *Rac-3c*

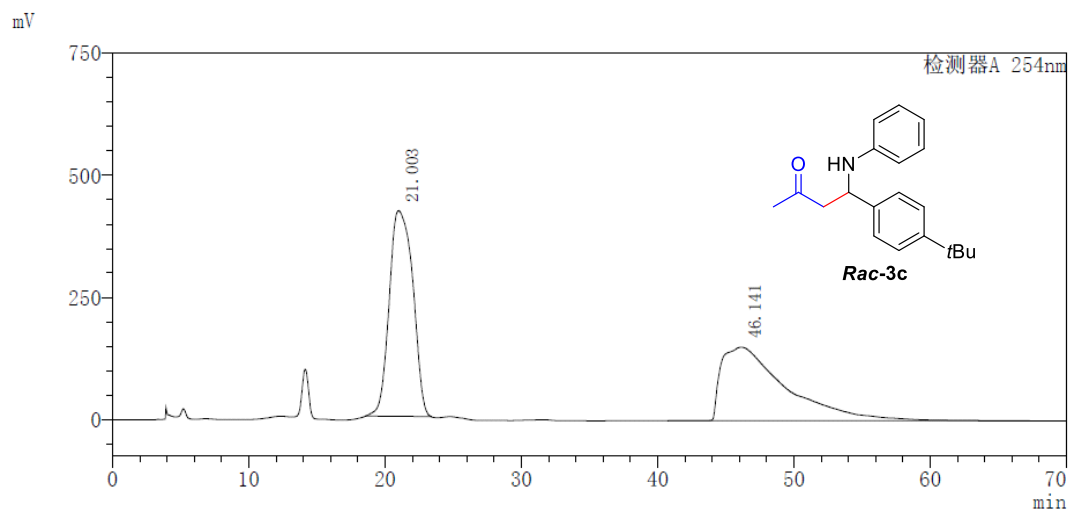

检测器A 254nm

| No. | Retention Time | Area      | Height | Concentration |
|-----|----------------|-----------|--------|---------------|
| 1   | 21.003         | 50756399  | 420770 | 50.506        |
| 2   | 46.141         | 49738554  | 150384 | 49.494        |
| 总计  |                | 100494952 | 571154 |               |

### HPLC spectrum of *3c*

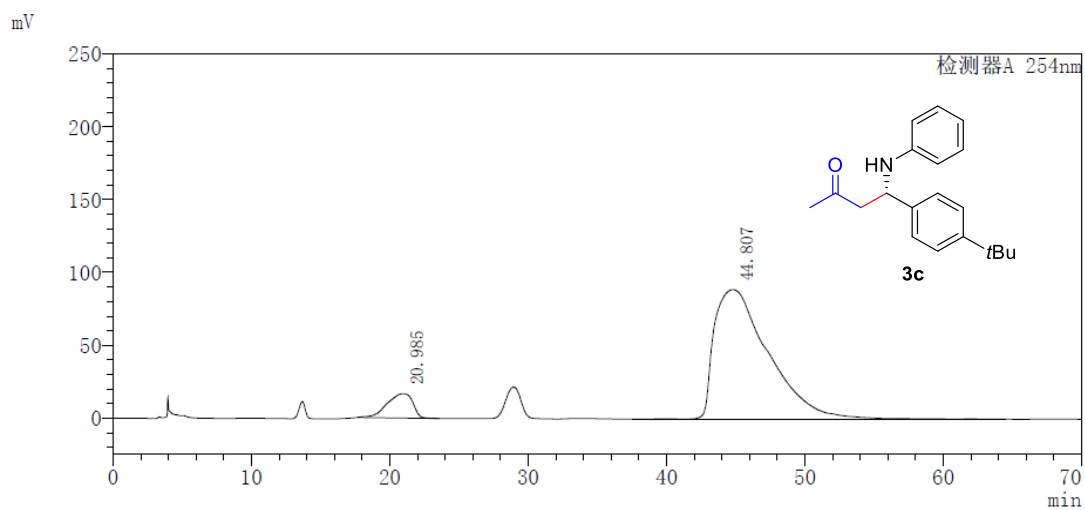

检测器A 254nm

| No. | Retention Time | Area     | Height | Concentration |
|-----|----------------|----------|--------|---------------|
| 1   | 20.985         | 2162867  | 16784  | 8.223         |
| 2   | 44.807         | 24140643 | 88744  | 91.777        |
| 总计  |                | 26303509 | 105528 |               |

### HPLC spectrum of *Rac-3d*

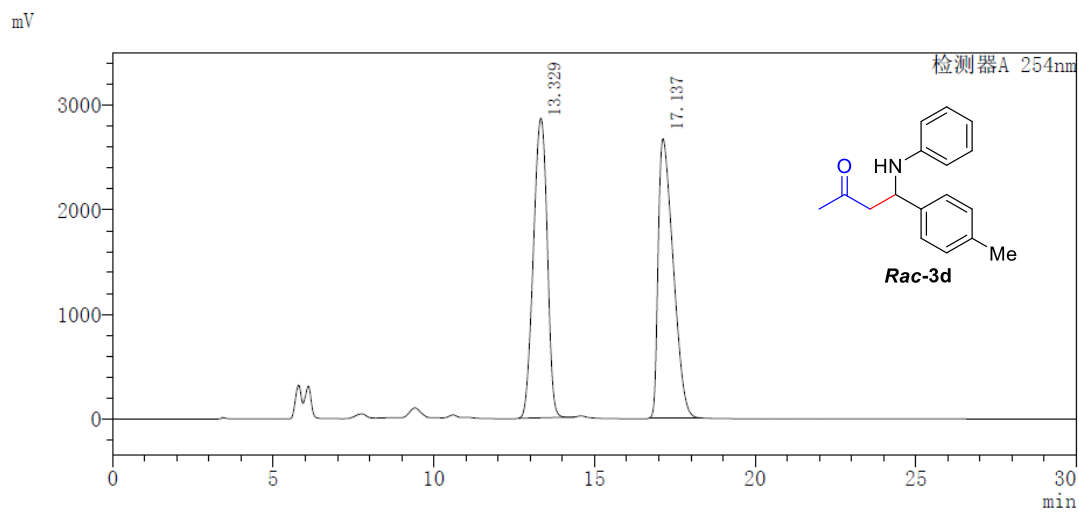

检测器A 254nm

| No. | Retention Time | Area      | Height  | Concentration |
|-----|----------------|-----------|---------|---------------|
| 1   | 13.329         | 85705965  | 2863611 | 49.690        |
| 2   | 17.137         | 86776305  | 2672221 | 50.310        |
| 总计  |                | 172482270 | 5535832 |               |

### HPLC spectrum of *3d*

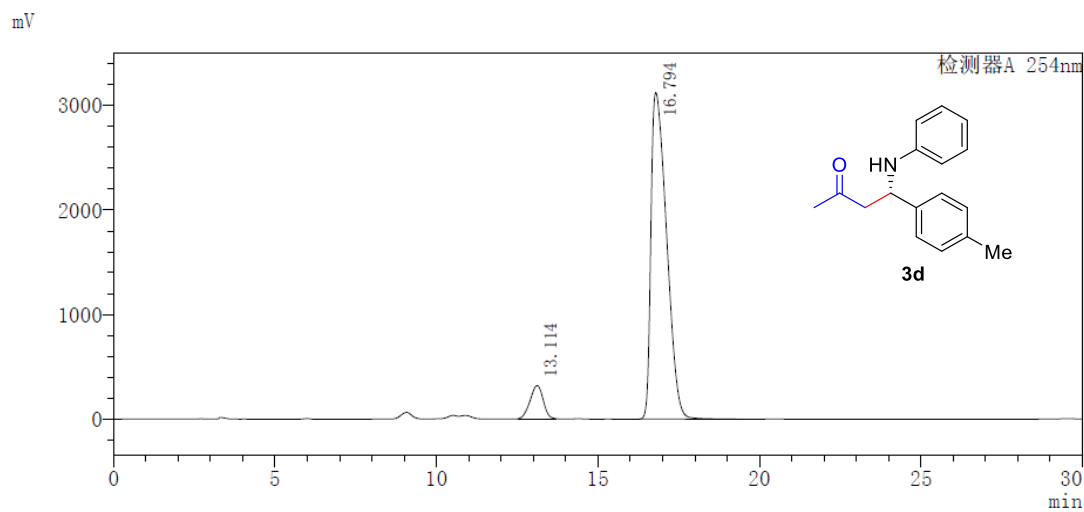

检测器A 254nm

| No. | Retention Time | Area      | Height  | Concentration |
|-----|----------------|-----------|---------|---------------|
| 1   | 13.114         | 8868157   | 317493  | 7.768         |
| 2   | 16.794         | 105293975 | 3122794 | 92.232        |
| 总计  |                | 114162132 | 3440287 |               |



### HPLC spectrum of *Rac-3e*

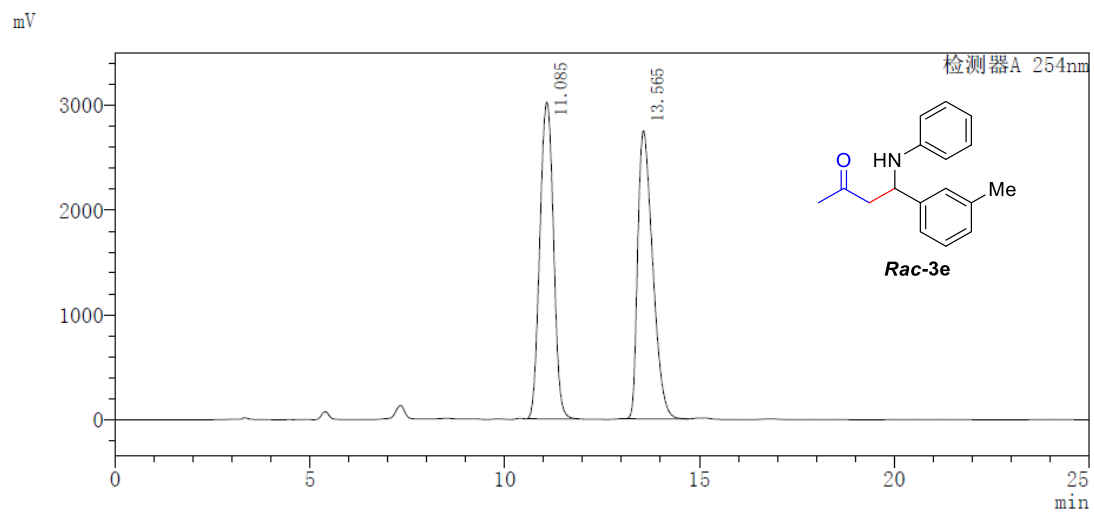

检测器A 254nm

| No. | Retention Time | Area      | Height  | Concentration |
|-----|----------------|-----------|---------|---------------|
| 1   | 11.085         | 73545034  | 3022307 | 50.033        |
| 2   | 13.565         | 73446743  | 2751768 | 49.967        |
| 总计  |                | 146991777 | 5774076 |               |

### HPLC spectrum of *3e*

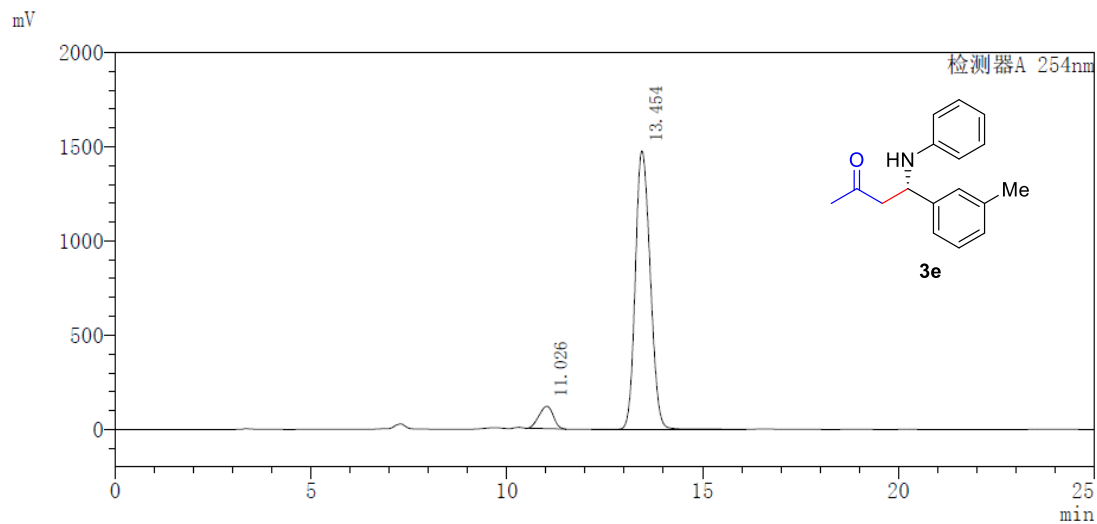

检测器A 254nm

| No. | Retention Time | Area     | Height  | Concentration |
|-----|----------------|----------|---------|---------------|
| 1   | 11.026         | 2992771  | 118599  | 7.089         |
| 2   | 13.454         | 39226898 | 1477467 | 92.911        |
| 总计  |                | 42219668 | 1596066 |               |

### HPLC spectrum of *Rac*-3f

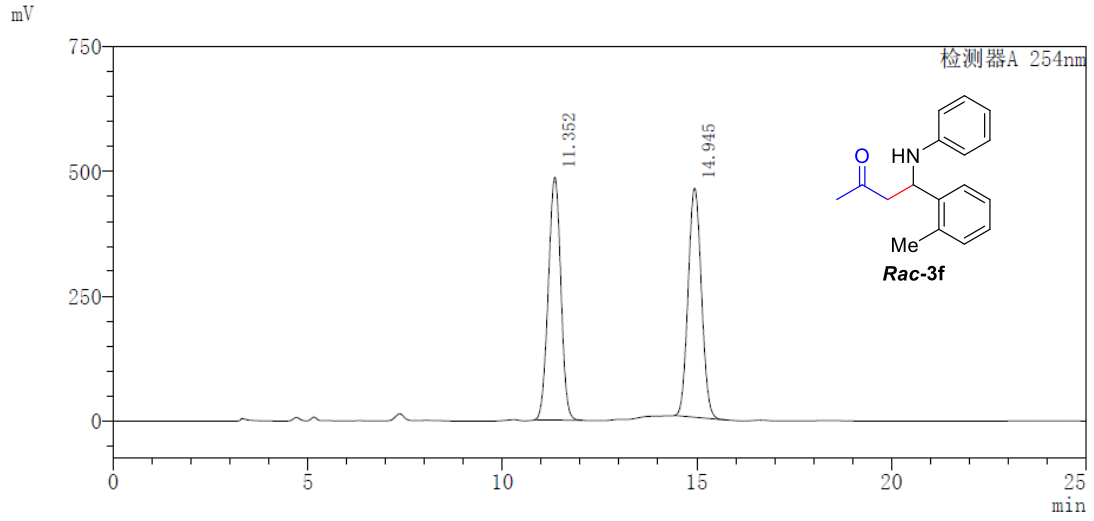

检测器A 254nm

| No. | Retention Time | Area     | Height | Concentration |
|-----|----------------|----------|--------|---------------|
| 1   | 11.352         | 10904811 | 486349 | 50.070        |
| 2   | 14.945         | 10874229 | 458775 | 49.930        |
| 总计  |                | 21779040 | 945124 |               |

### HPLC spectrum of 3f

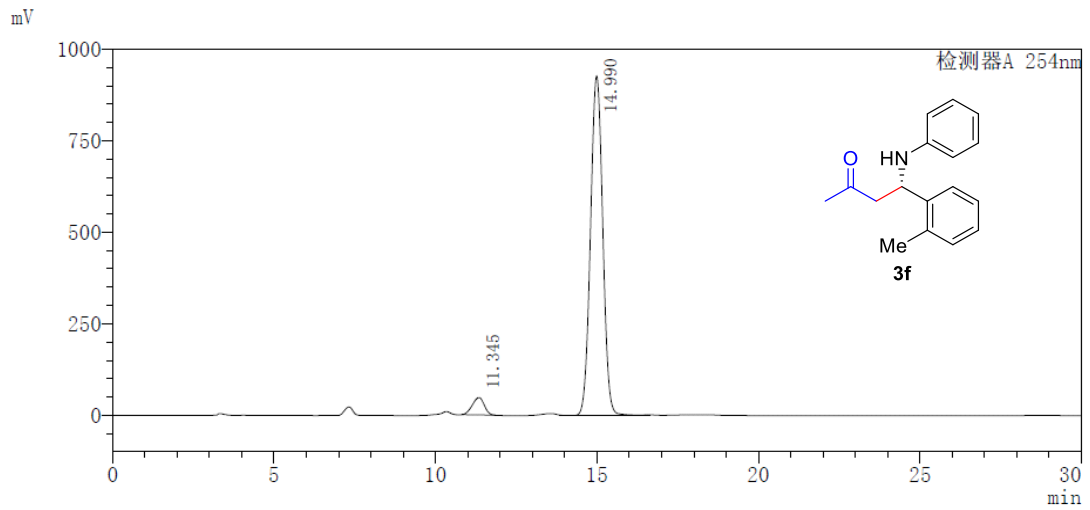

检测器A 254nm

| No. | Retention Time | Area     | Height | Concentration |
|-----|----------------|----------|--------|---------------|
| 1   | 11.345         | 1222300  | 47497  | 4.794         |
| 2   | 14.990         | 24274435 | 925955 | 95.206        |
| 总计  |                | 25496735 | 973452 |               |

### HPLC spectrum of *Rac-3g*

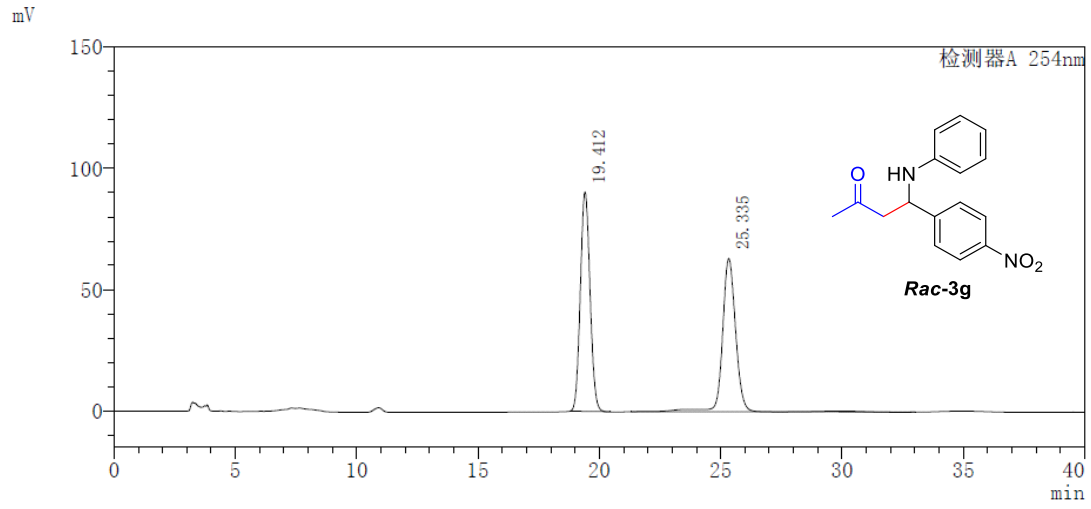

检测器A 254nm

| No. | Retention Time | Area    | Height | Concentration |
|-----|----------------|---------|--------|---------------|
| 1   | 19.412         | 2510402 | 90361  | 50.702        |
| 2   | 25.335         | 2440849 | 63192  | 49.298        |
| 总计  |                | 4951251 | 153553 |               |

### HPLC spectrum of *3g*

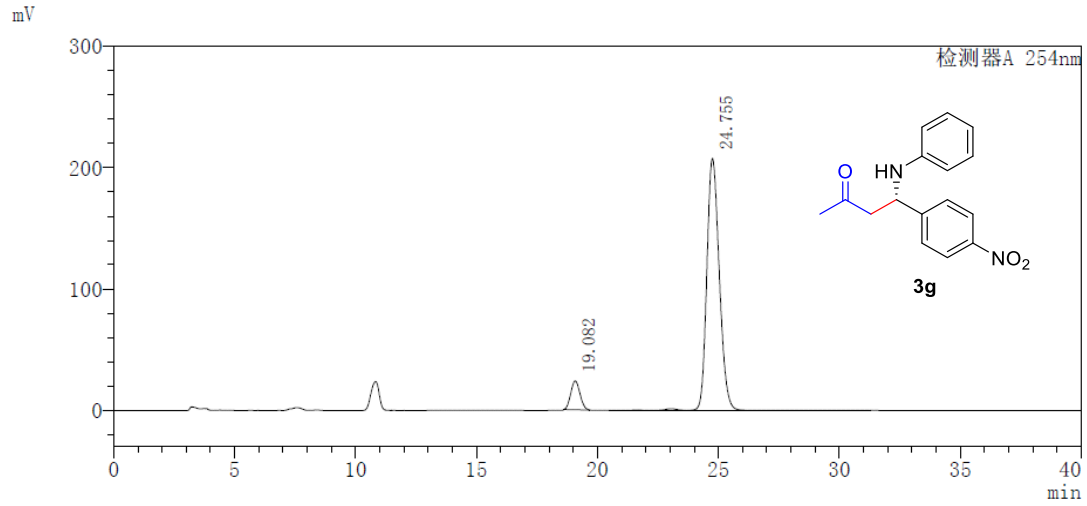

检测器A 254nm

| No. | Retention Time | Area    | Height | Concentration |
|-----|----------------|---------|--------|---------------|
| 1   | 19.082         | 630027  | 23749  | 7.771         |
| 2   | 24.755         | 7477222 | 207572 | 92.229        |
| 总计  |                | 8107249 | 231322 |               |

### HPLC spectrum of *Rac-3h*

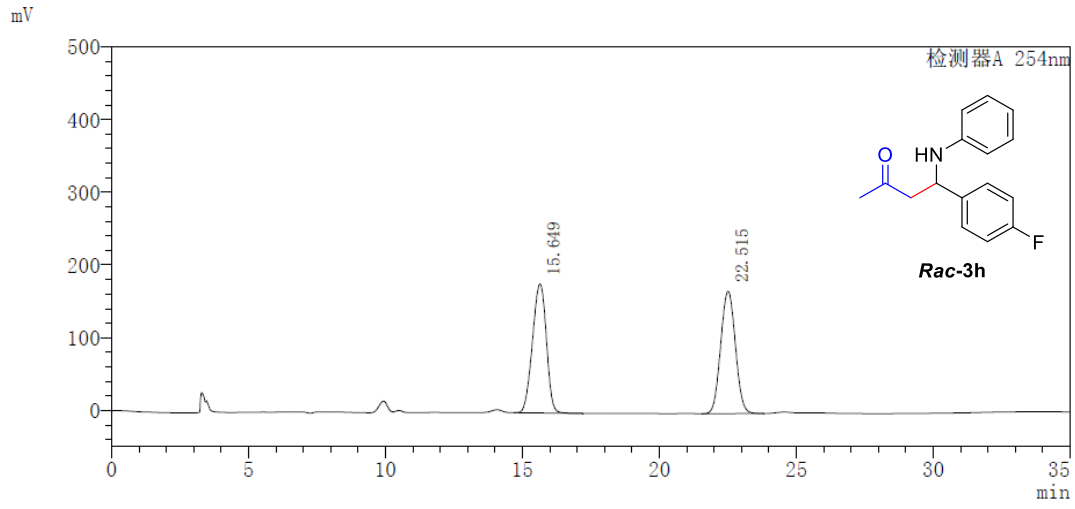

| 检测器A 254nm |                |          |        |               |
|------------|----------------|----------|--------|---------------|
| No.        | Retention Time | Area     | Height | Concentration |
| 1          | 15.649         | 6264032  | 177462 | 49.893        |
| 2          | 22.515         | 6290845  | 168328 | 50.107        |
| 总计         |                | 12554876 | 345790 |               |

### HPLC spectrum of *3h*

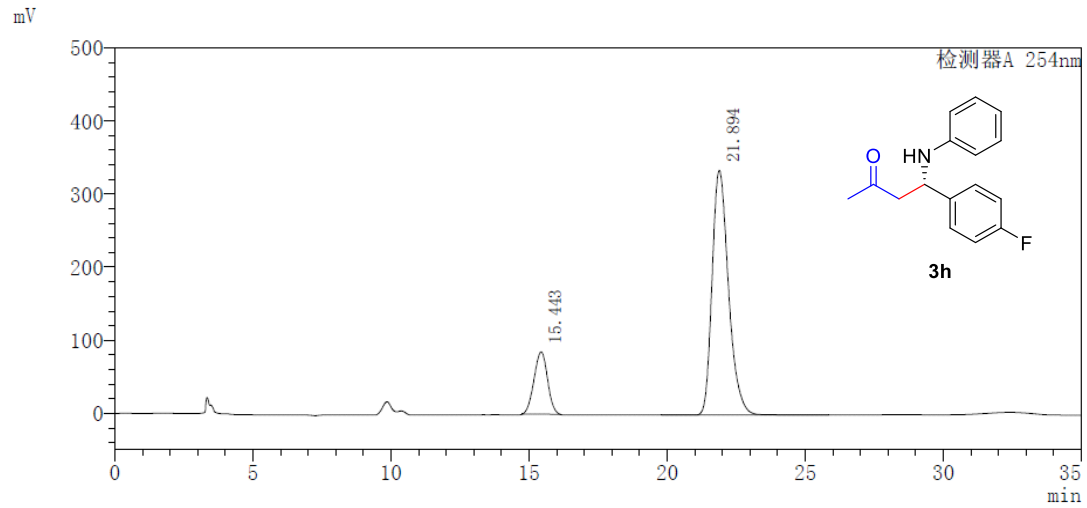

| 检测器A 254nm |                |          |        |               |
|------------|----------------|----------|--------|---------------|
| No.        | Retention Time | Area     | Height | Concentration |
| 1          | 15.443         | 2897809  | 85142  | 17.317        |
| 2          | 21.894         | 13836054 | 334836 | 82.683        |
| 总计         |                | 16733862 | 419977 |               |

### HPLC spectrum of *Rac-3i*

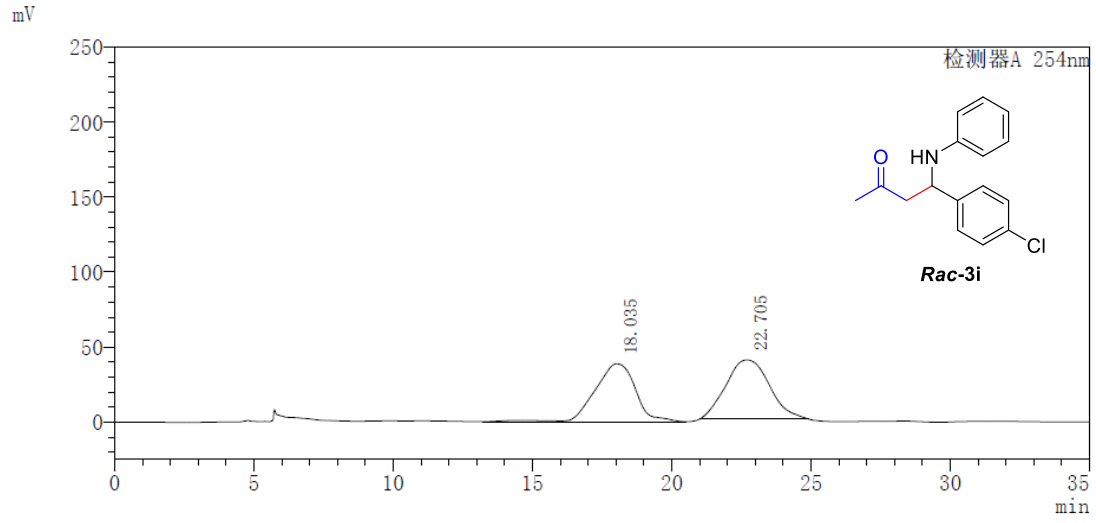

检测器A 254nm

| No. | Retention Time | Area    | Height | Concentration |
|-----|----------------|---------|--------|---------------|
| 1   | 18.035         | 3904688 | 38643  | 47.598        |
| 2   | 22.705         | 4298796 | 39427  | 52.402        |
| 总计  |                | 8203484 | 78070  |               |

### HPLC spectrum of *3i*

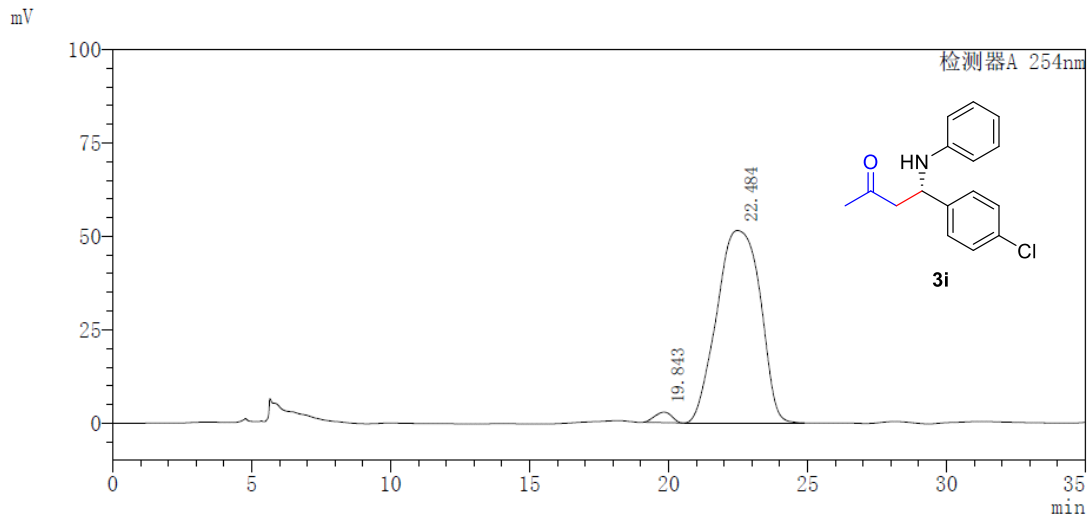

检测器A 254nm

| No. | Retention Time | Area    | Height | Concentration |
|-----|----------------|---------|--------|---------------|
| 1   | 19.843         | 120277  | 2795   | 2.102         |
| 2   | 22.484         | 5601409 | 51474  | 97.898        |
| 总计  |                | 5721687 | 54269  |               |

### HPLC spectrum of *Rac-3j*

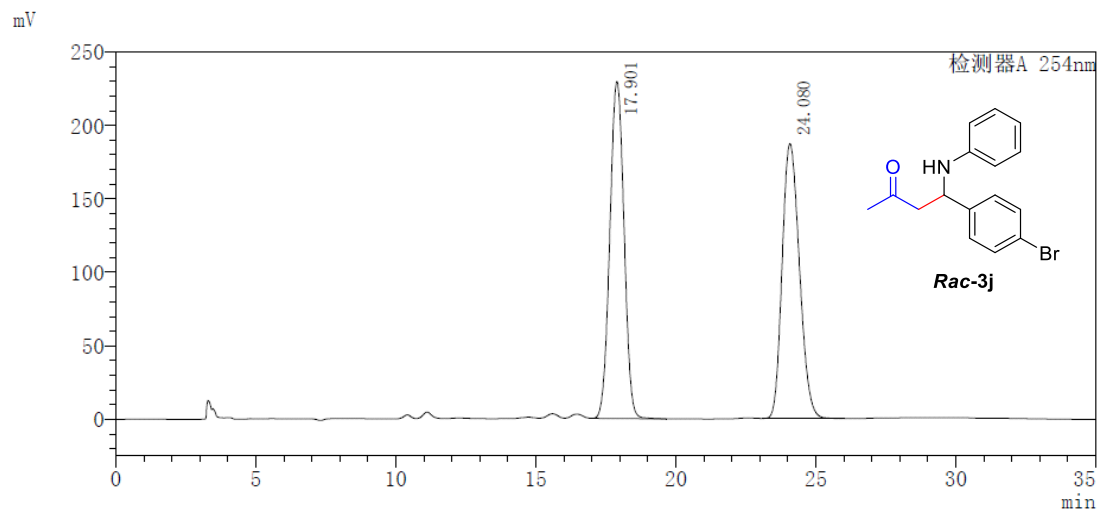

检测器A 254nm

| No. | Retention Time | Area     | Height | Concentration |
|-----|----------------|----------|--------|---------------|
| 1   | 17.901         | 8081210  | 229506 | 50.124        |
| 2   | 24.080         | 8041180  | 187141 | 49.876        |
| 总计  |                | 16122390 | 416647 |               |

### HPLC spectrum of *3j*

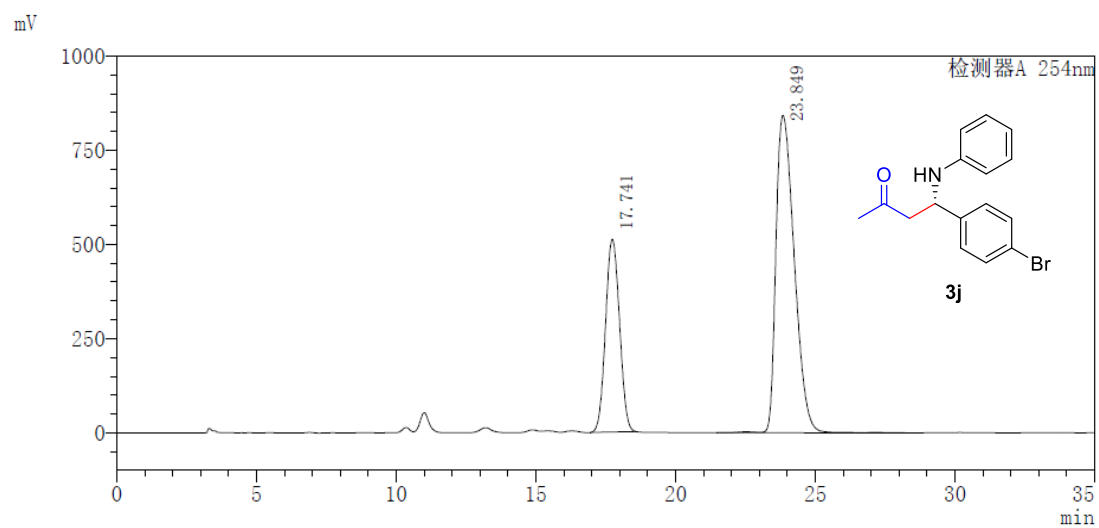

检测器A 254nm

| No. | Retention Time | Area     | Height  | Concentration |
|-----|----------------|----------|---------|---------------|
| 1   | 17.741         | 17785103 | 511741  | 31.614        |
| 2   | 23.849         | 38472636 | 842736  | 68.386        |
| 总计  |                | 56257739 | 1354477 |               |

### HPLC spectrum of *Rac-3k*

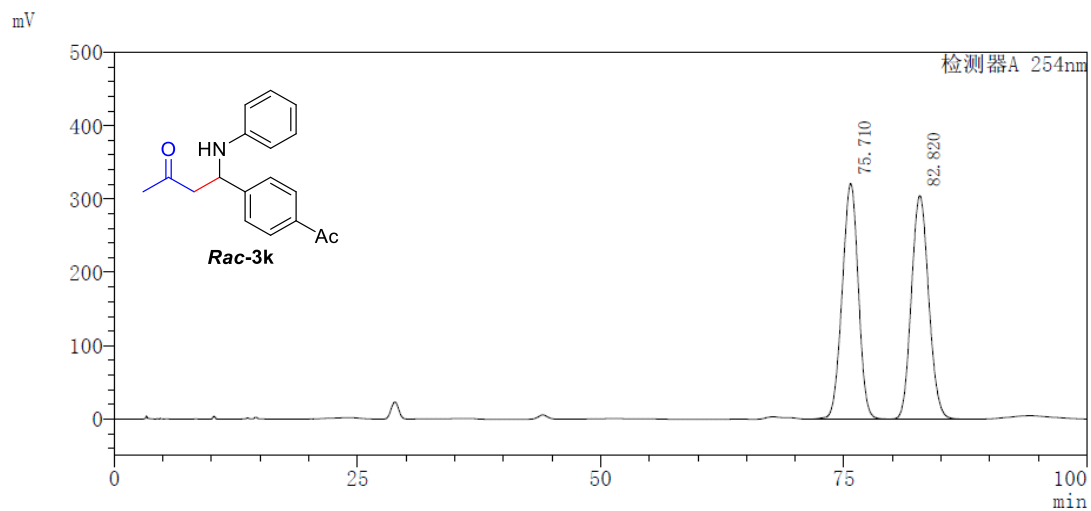

| 检测器A 254nm |                |          |        |               |
|------------|----------------|----------|--------|---------------|
| No.        | Retention Time | Area     | Height | Concentration |
| 1          | 75.710         | 37138987 | 321319 | 49.593        |
| 2          | 82.820         | 37749177 | 304821 | 50.407        |
| 总计         |                | 74888165 | 626141 |               |

### HPLC spectrum of *3k*

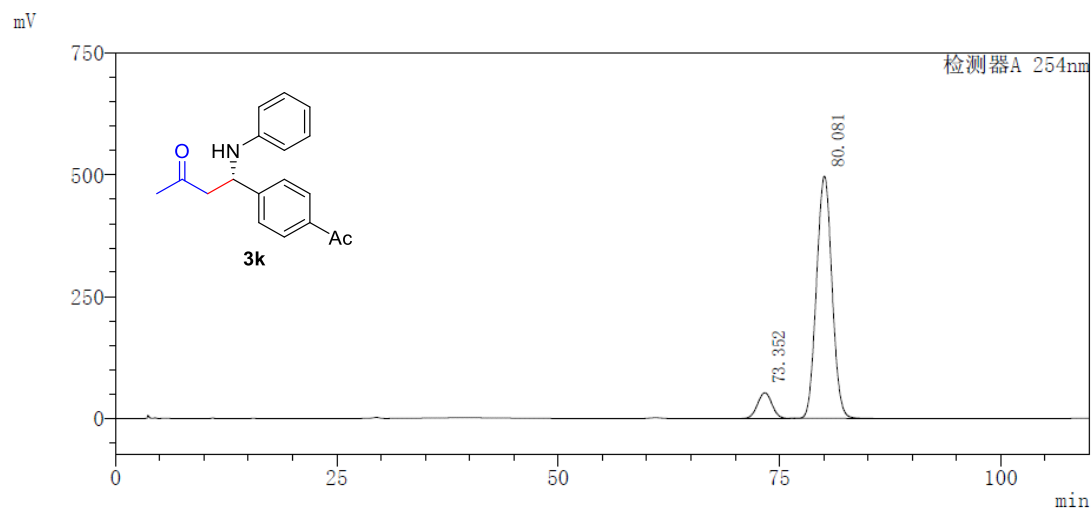

| 检测器A 254nm |                |          |        |               |
|------------|----------------|----------|--------|---------------|
| No.        | Retention Time | Area     | Height | Concentration |
| 1          | 73.352         | 5925311  | 52571  | 8.893         |
| 2          | 80.081         | 60700886 | 497214 | 91.107        |
| 总计         |                | 66626197 | 549786 |               |

### HPLC spectrum of *Rac-3I*

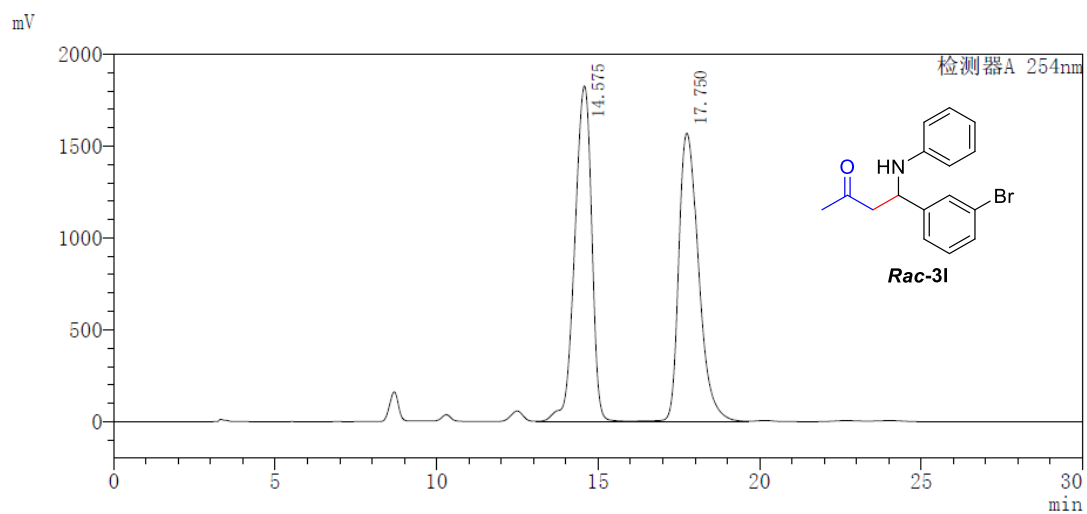

检测器A 254nm

| No. | Retention Time | Area      | Height  | Concentration |
|-----|----------------|-----------|---------|---------------|
| 1   | 14.575         | 66716361  | 1826711 | 50.072        |
| 2   | 17.750         | 66525308  | 1569246 | 49.928        |
| 总计  |                | 133241668 | 3395957 |               |

### HPLC spectrum of **3I**

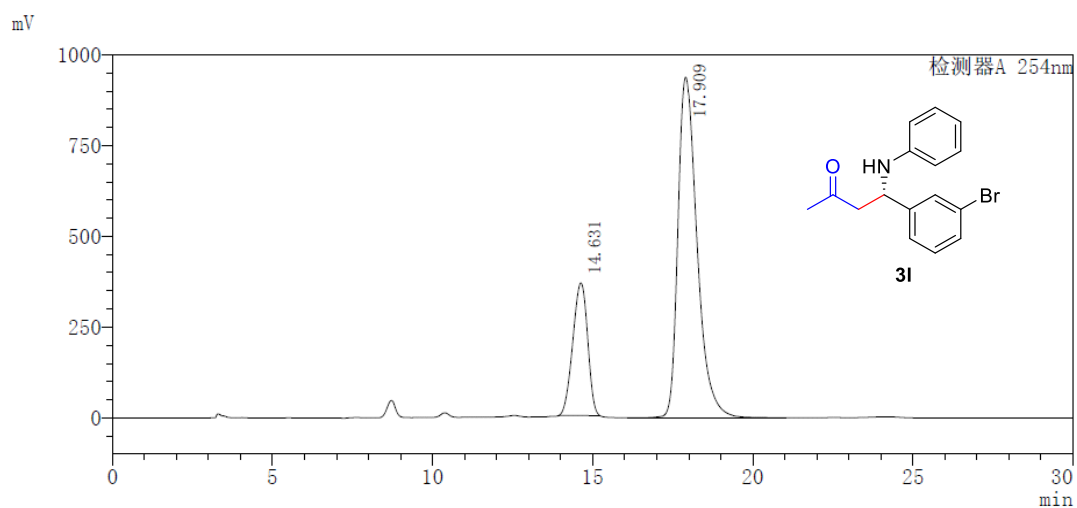

检测器A 254nm

| No. | Retention Time | Area     | Height  | Concentration |
|-----|----------------|----------|---------|---------------|
| 1   | 14.631         | 11773871 | 365332  | 23.320        |
| 2   | 17.909         | 38714202 | 938699  | 76.680        |
| 总计  |                | 50488072 | 1304030 |               |



### HPLC spectrum of *Rac-3m*

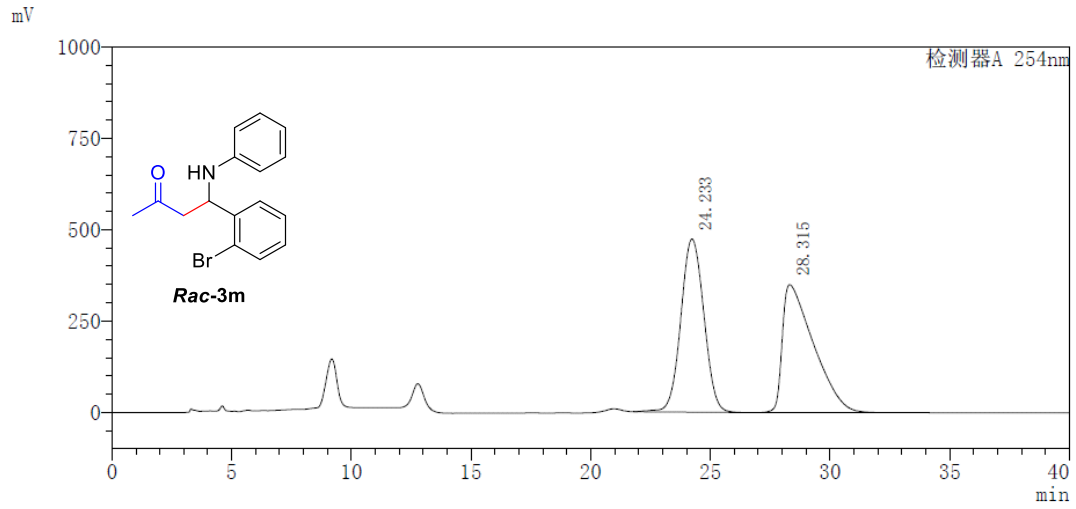

检测器A 254nm

| No. | Retention Time | Area     | Height | Concentration |
|-----|----------------|----------|--------|---------------|
| 1   | 24.233         | 31818690 | 474067 | 50.093        |
| 2   | 28.315         | 31700421 | 350041 | 49.907        |
| 总计  |                | 63519110 | 824108 |               |

### HPLC spectrum of *3m*

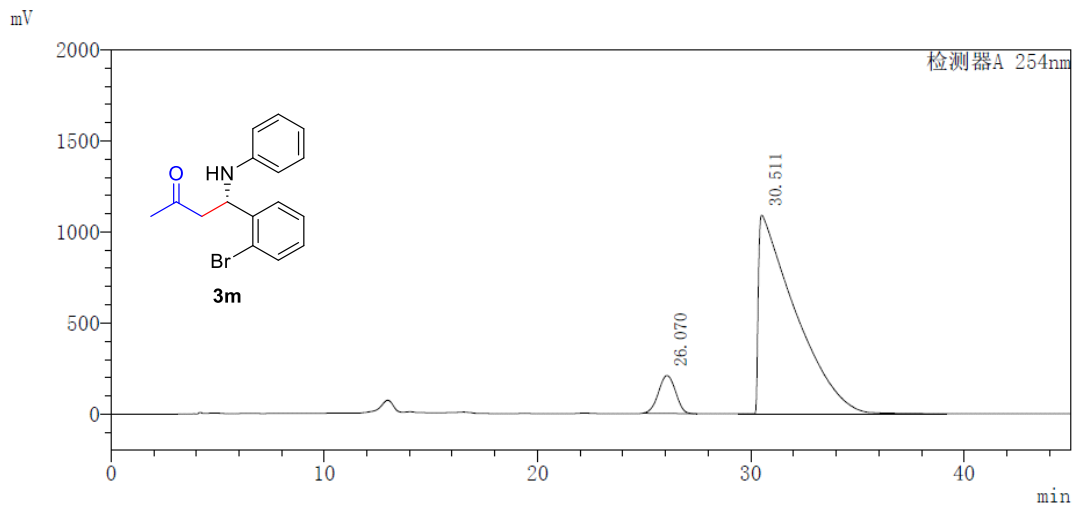

检测器A 254nm

| No. | Retention Time | Area      | Height  | Concentration |
|-----|----------------|-----------|---------|---------------|
| 1   | 26.070         | 11629549  | 207997  | 8.127         |
| 2   | 30.511         | 131475123 | 1090508 | 91.873        |
| 总计  |                | 143104672 | 1298505 |               |

### HPLC spectrum of *Rac-3n*

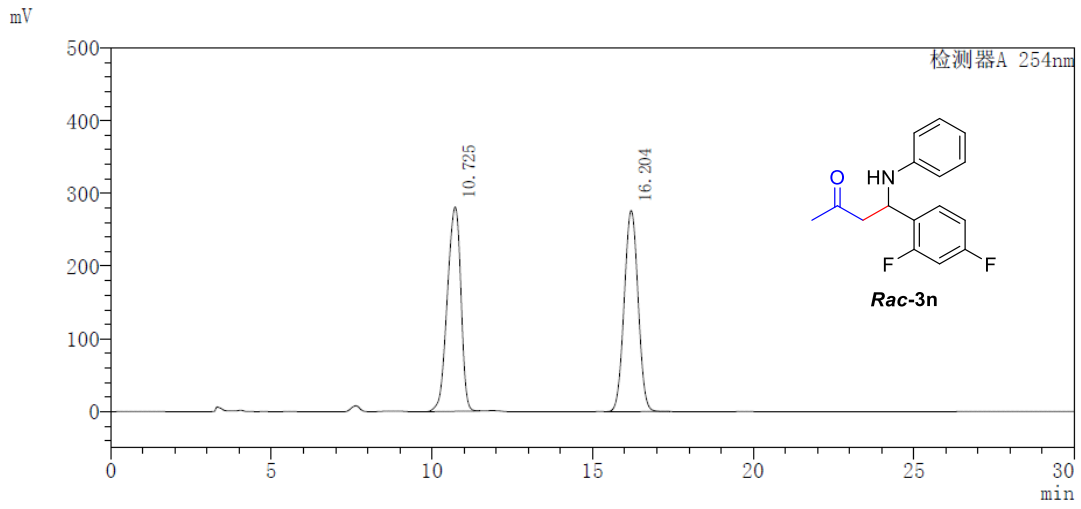

检测器A 254nm

| No. | Retention Time | Area     | Height | Concentration |
|-----|----------------|----------|--------|---------------|
| 1   | 10.725         | 8288294  | 281055 | 49.884        |
| 2   | 16.204         | 8326980  | 276668 | 50.116        |
| 总计  |                | 16615275 | 557723 |               |

### HPLC spectrum of *3n*

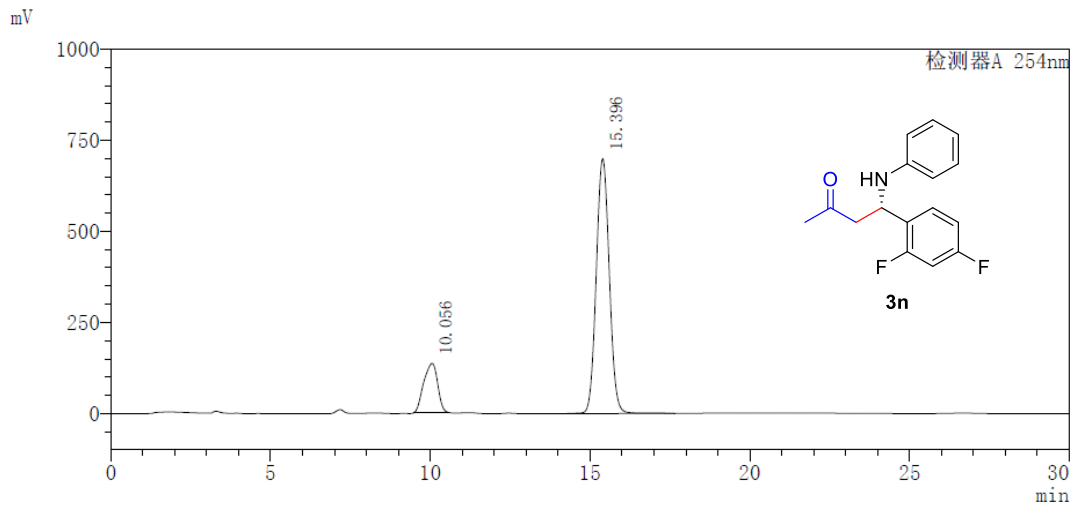

检测器A 254nm

| No. | Retention Time | Area     | Height | Concentration |
|-----|----------------|----------|--------|---------------|
| 1   | 10.056         | 4097811  | 135221 | 17.087        |
| 2   | 15.396         | 19884798 | 699505 | 82.913        |
| 总计  |                | 23982609 | 834726 |               |

### HPLC spectrum of *Rac-3o*

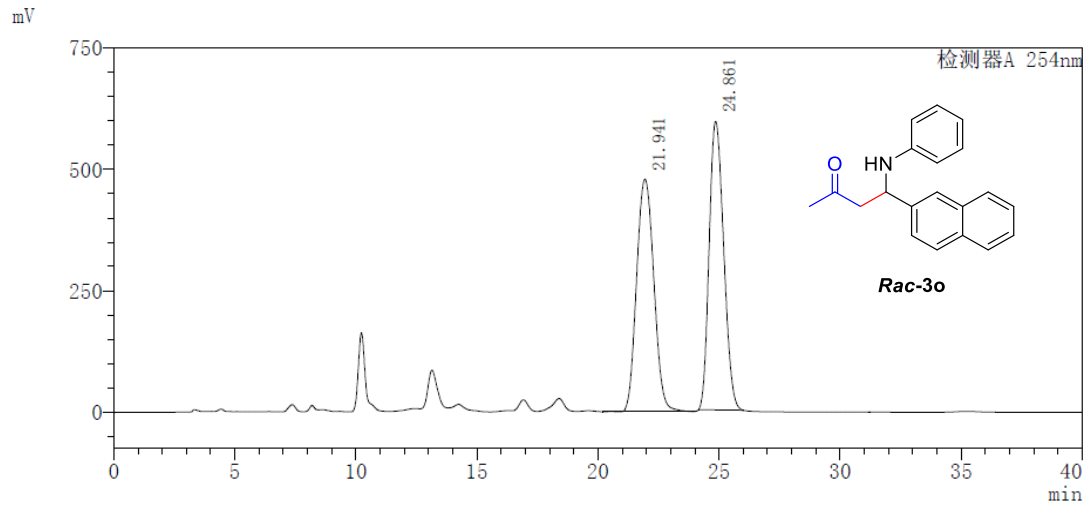

| No. | Retention Time | Area     | Height  | Concentration |
|-----|----------------|----------|---------|---------------|
| 1   | 21.941         | 23712287 | 478713  | 48.866        |
| 2   | 24.861         | 24812747 | 594243  | 51.134        |
| 总计  |                | 48525035 | 1072956 |               |

### HPLC spectrum of *3o*

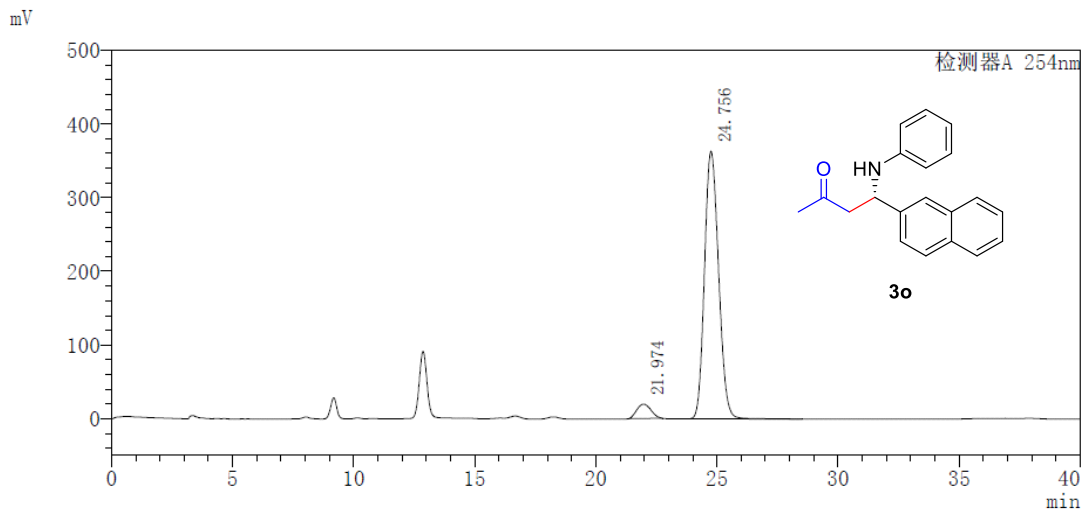

| No. | Retention Time | Area     | Height | Concentration |
|-----|----------------|----------|--------|---------------|
| 1   | 21.974         | 783990   | 19251  | 5.053         |
| 2   | 24.756         | 14730790 | 363209 | 94.947        |
| 总计  |                | 15514780 | 382460 |               |

### HPLC spectrum of *Rac*-3p

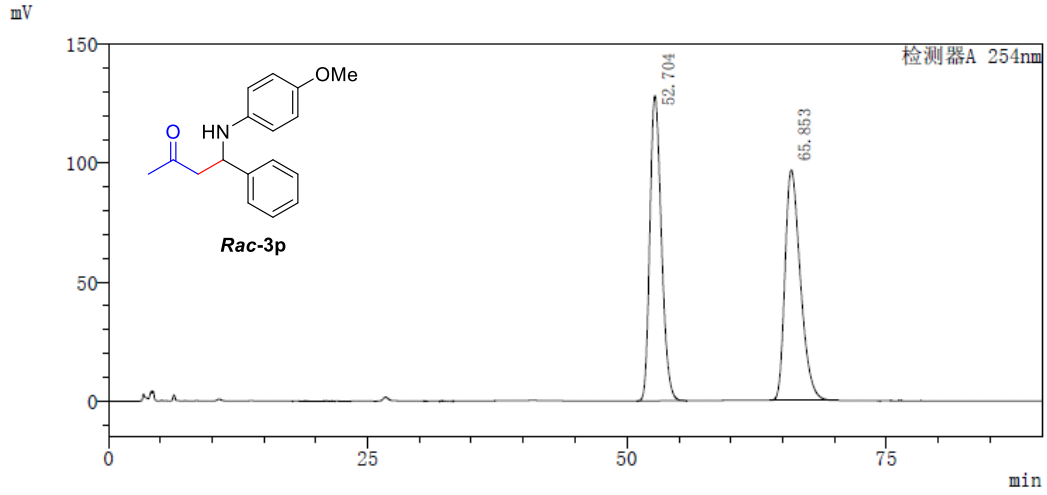

| 检测器A 254nm |                |          |        |               |
|------------|----------------|----------|--------|---------------|
| No.        | Retention Time | Area     | Height | Concentration |
| 1          | 52.704         | 9909718  | 128286 | 49.844        |
| 2          | 65.853         | 9971752  | 96931  | 50.156        |
| 总计         |                | 19881470 | 225217 |               |

### HPLC spectrum of 3p

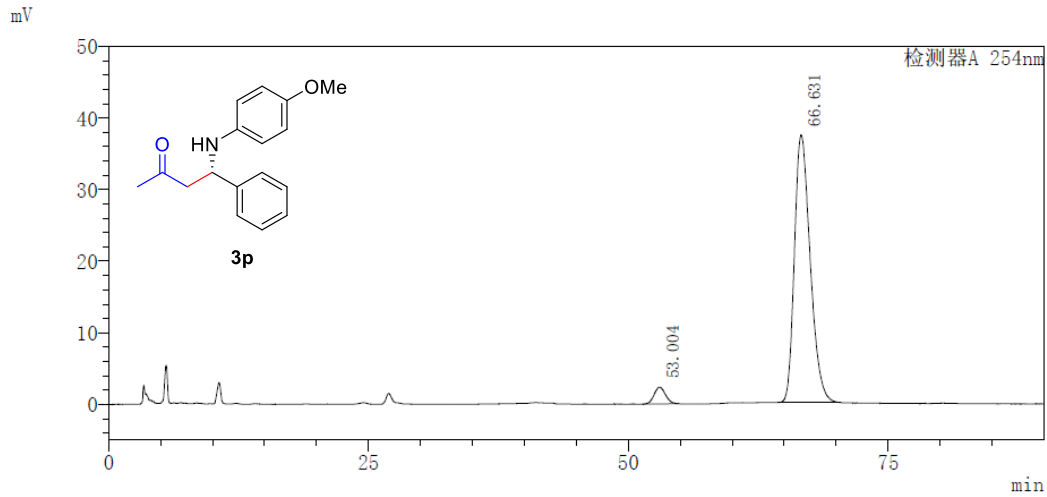

| 检测器A 254nm |                |         |        |               |
|------------|----------------|---------|--------|---------------|
| No.        | Retention Time | Area    | Height | Concentration |
| 1          | 53.004         | 178446  | 2348   | 4.329         |
| 2          | 66.631         | 3943312 | 37355  | 95.671        |
| 总计         |                | 4121757 | 39704  |               |

### HPLC spectrum of *Rac-3q*

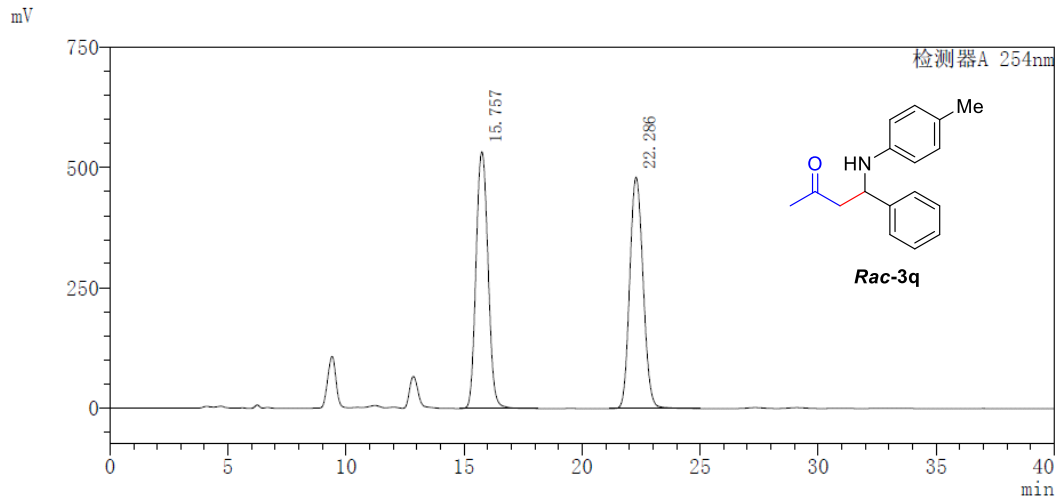

检测器A 254nm

| No. | Retention Time | Area     | Height  | Concentration |
|-----|----------------|----------|---------|---------------|
| 1   | 15.757         | 18849285 | 534289  | 49.918        |
| 2   | 22.286         | 18911229 | 481089  | 50.082        |
| 总计  |                | 37760515 | 1015378 |               |

### HPLC spectrum of *3q*

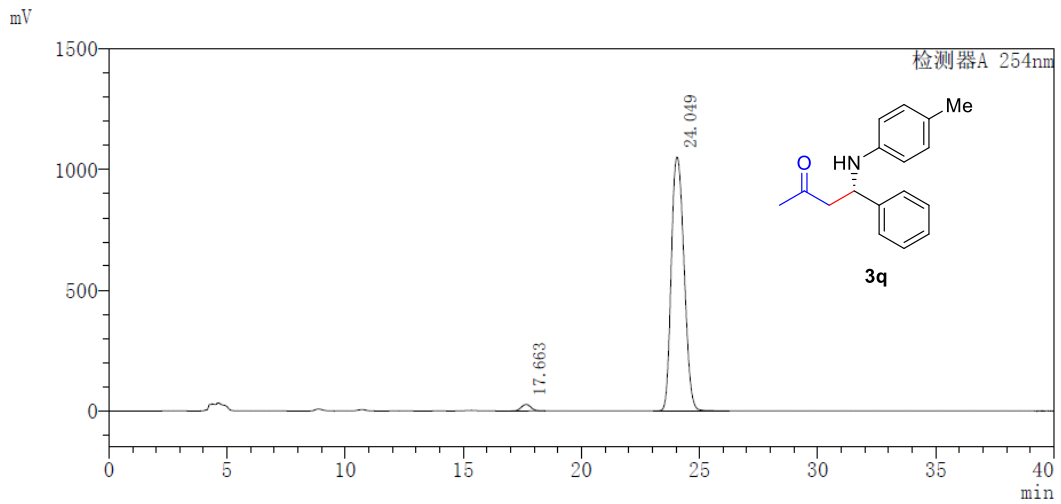

检测器A 254nm

| No. | Retention Time | Area     | Height  | Concentration |
|-----|----------------|----------|---------|---------------|
| 1   | 17.663         | 761540   | 26694   | 1.895         |
| 2   | 24.049         | 39419943 | 1051871 | 98.105        |
| 总计  |                | 40181483 | 1078564 |               |

### HPLC spectrum of *Rac-3r*

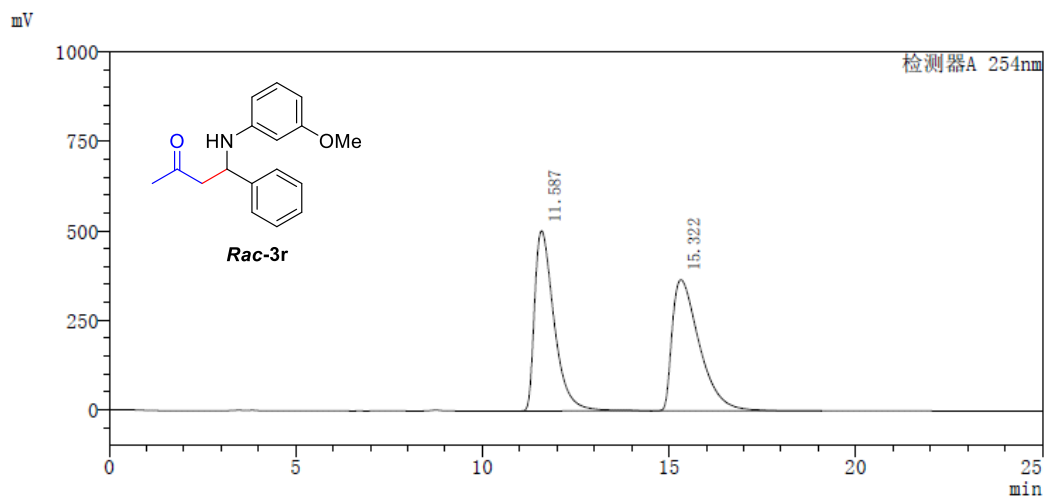

检测器A 254nm

| No. | Retention Time | Area     | Height | Concentration |
|-----|----------------|----------|--------|---------------|
| 1   | 11.587         | 18391791 | 504034 | 49.760        |
| 2   | 15.322         | 18569474 | 366301 | 50.240        |
| 总计  |                | 36961265 | 870335 |               |

### HPLC spectrum of *3r*

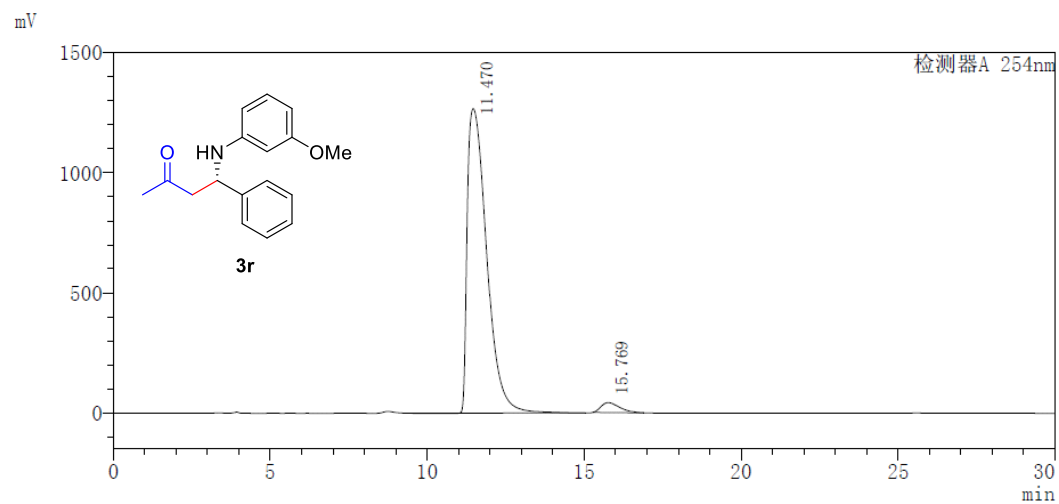

检测器A 254nm

| No. | Retention Time | Area     | Height  | Concentration |
|-----|----------------|----------|---------|---------------|
| 1   | 11.470         | 54330255 | 1267118 | 96.982        |
| 2   | 15.769         | 1690497  | 40842   | 3.018         |
| 总计  |                | 56020752 | 1307960 |               |

### HPLC spectrum of *Rac-3s*

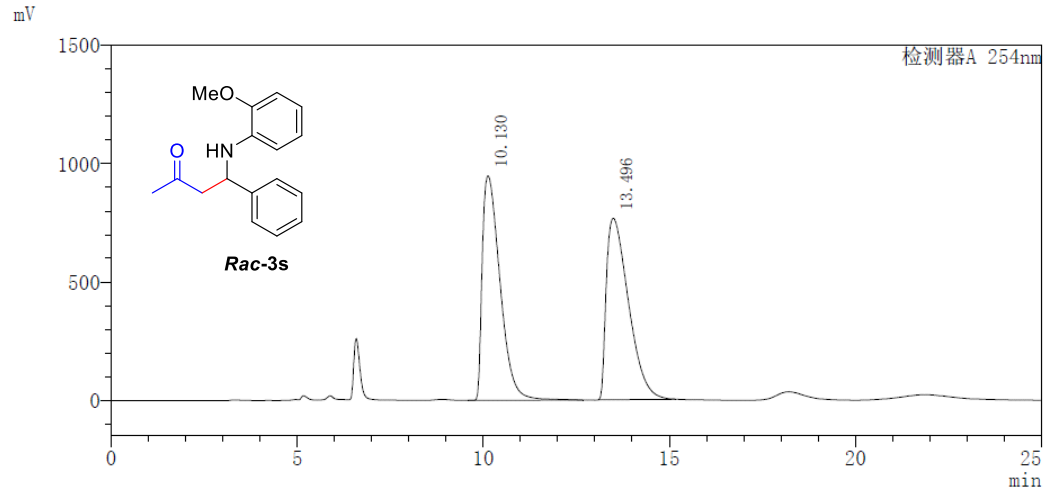

检测器A 254nm

| No. | Retention Time | Area     | Height  | Concentration |
|-----|----------------|----------|---------|---------------|
| 1   | 10.130         | 31522366 | 948476  | 49.833        |
| 2   | 13.496         | 31733087 | 765658  | 50.167        |
| 总计  |                | 63255453 | 1714135 |               |

### HPLC spectrum of *3s*

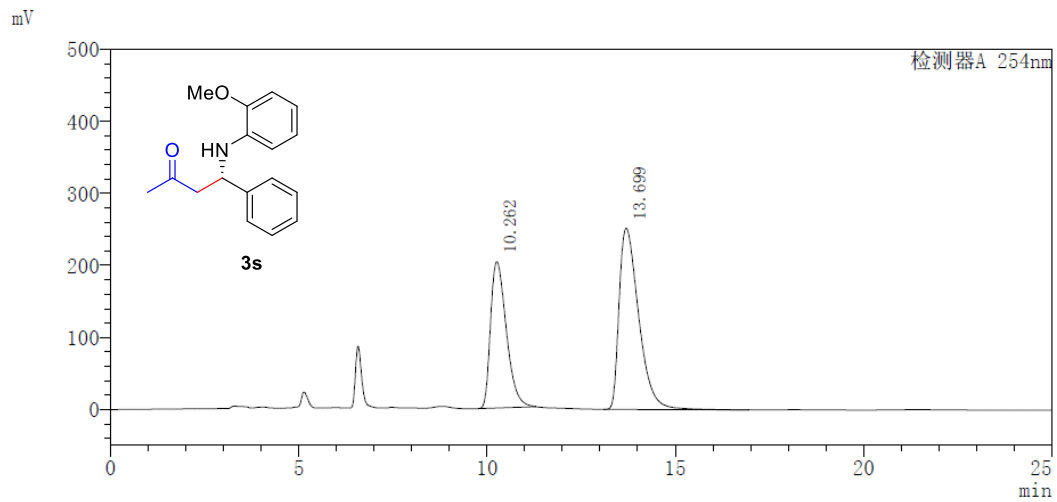

检测器A 254nm

| No. | Retention Time | Area     | Height | Concentration |
|-----|----------------|----------|--------|---------------|
| 1   | 10.262         | 5940262  | 203277 | 39.461        |
| 2   | 13.699         | 9113256  | 251682 | 60.539        |
| 总计  |                | 15053519 | 454959 |               |

### HPLC spectrum of *Rac-3t*

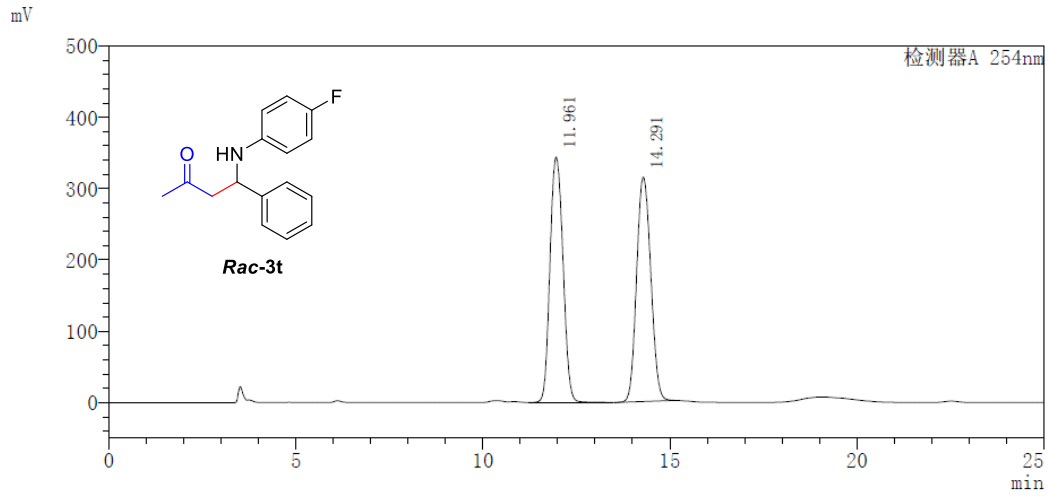

| 检测器A 254nm |                |          |        |               |
|------------|----------------|----------|--------|---------------|
| No.        | Retention Time | Area     | Height | Concentration |
| 1          | 11.961         | 8317069  | 343751 | 50.079        |
| 2          | 14.291         | 8290663  | 314652 | 49.921        |
| 总计         |                | 16607731 | 658403 |               |

### HPLC spectrum of *3t*

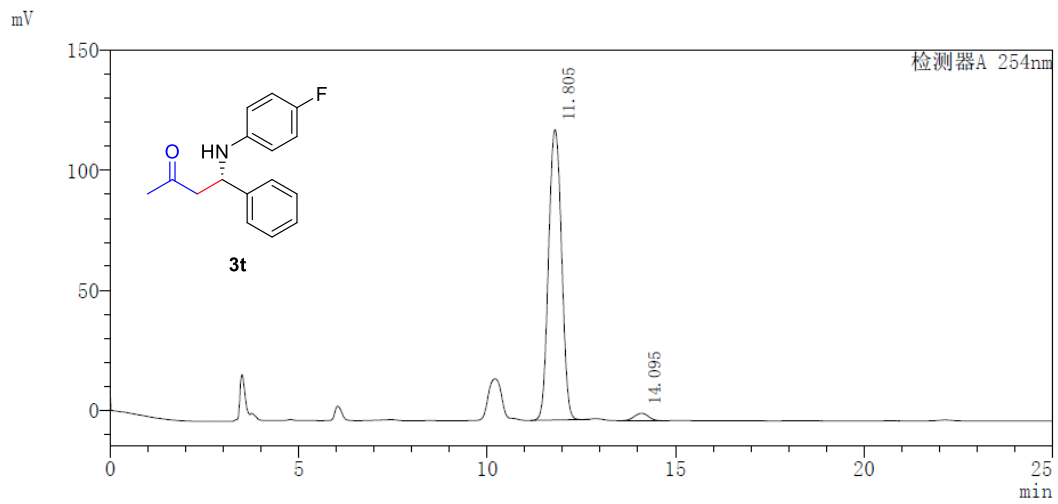

| 检测器A 254nm |                |         |        |               |
|------------|----------------|---------|--------|---------------|
| No.        | Retention Time | Area    | Height | Concentration |
| 1          | 11.805         | 2898902 | 120950 | 97.377        |
| 2          | 14.095         | 78096   | 3023   | 2.623         |
| 总计         |                | 2976998 | 123973 |               |



### HPLC spectrum of *Rac-3u*

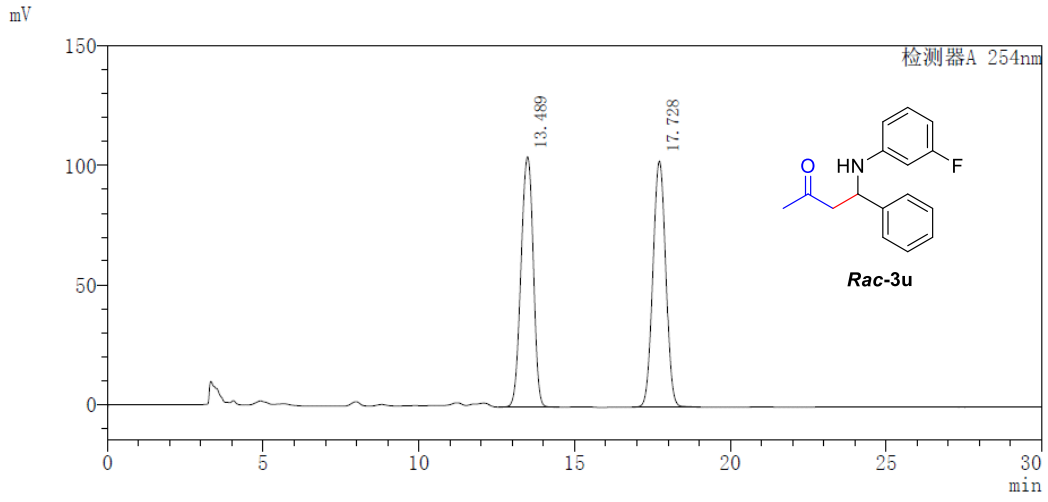

检测器A 254nm

| No. | Retention Time | Area    | Height | Concentration |
|-----|----------------|---------|--------|---------------|
| 1   | 13.489         | 2874563 | 104710 | 49.369        |
| 2   | 17.728         | 2948080 | 102912 | 50.631        |
| 总计  |                | 5822643 | 207622 |               |

### HPLC spectrum of *3u*

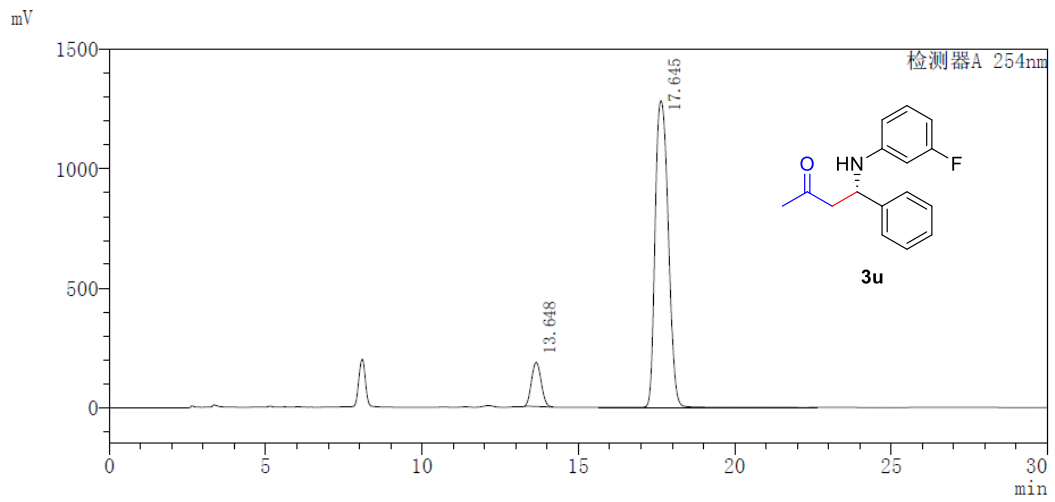

检测器A 254nm

| No. | Retention Time | Area     | Height  | Concentration |
|-----|----------------|----------|---------|---------------|
| 1   | 13.648         | 3978314  | 184008  | 9.646         |
| 2   | 17.645         | 37265672 | 1283095 | 90.354        |
| 总计  |                | 41243986 | 1467103 |               |

### HPLC spectrum of *Rac-3v*

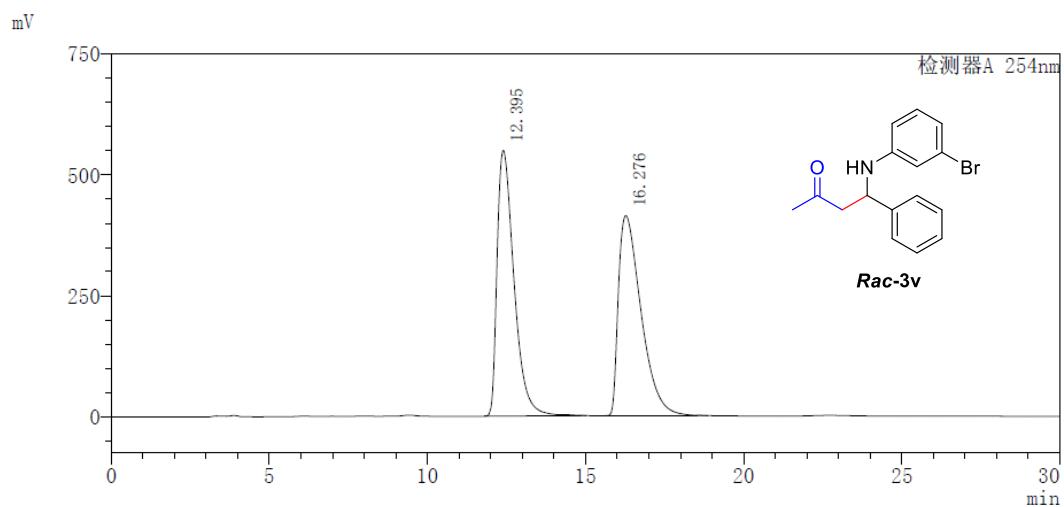

检测器A 254nm

| No. | Retention Time | Area     | Height | Concentration |
|-----|----------------|----------|--------|---------------|
| 1   | 12.395         | 20479247 | 549359 | 49.788        |
| 2   | 16.276         | 20653310 | 413818 | 50.212        |
| 总计  |                | 41132557 | 963177 |               |

### HPLC spectrum of *3v*

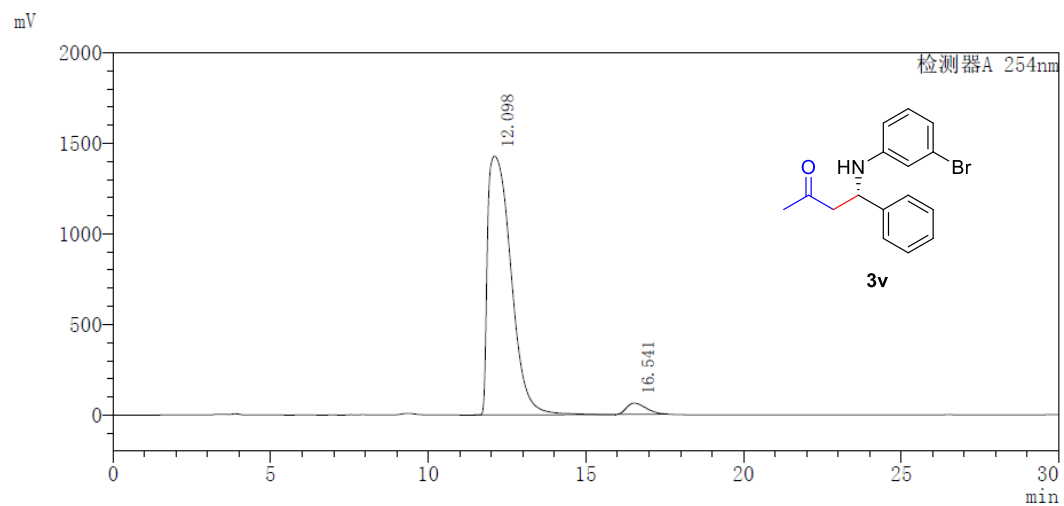

检测器A 254nm

| No. | Retention Time | Area     | Height  | Concentration |
|-----|----------------|----------|---------|---------------|
| 1   | 12.098         | 73181778 | 1428731 | 96.525        |
| 2   | 16.541         | 2634573  | 61600   | 3.475         |
| 总计  |                | 75816351 | 1490331 |               |

### HPLC spectrum of *Rac-3w*

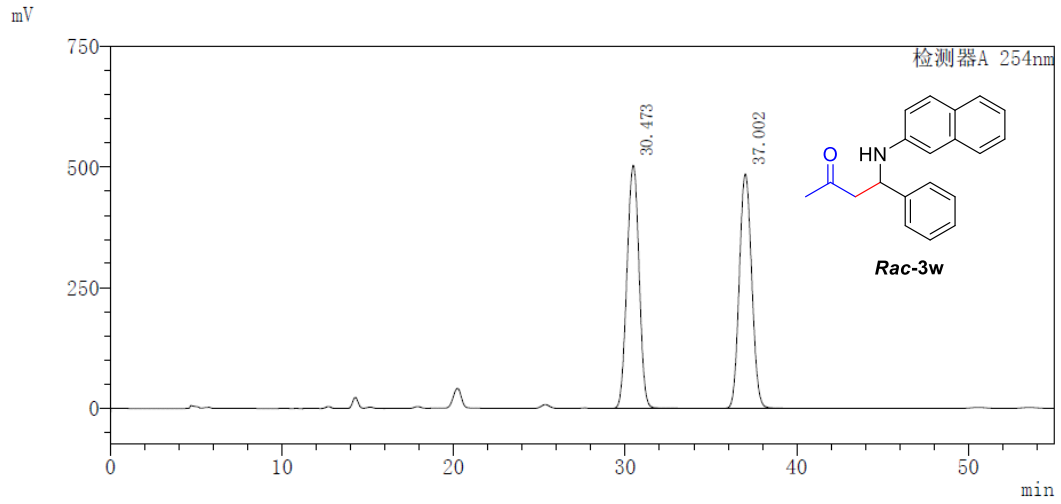

检测器A 254nm

| No. | Retention Time | Area     | Height | Concentration |
|-----|----------------|----------|--------|---------------|
| 1   | 30.473         | 24759110 | 503934 | 50.302        |
| 2   | 37.002         | 24461397 | 486009 | 49.698        |
| 总计  |                | 49220506 | 989943 |               |

### HPLC spectrum of *3w*

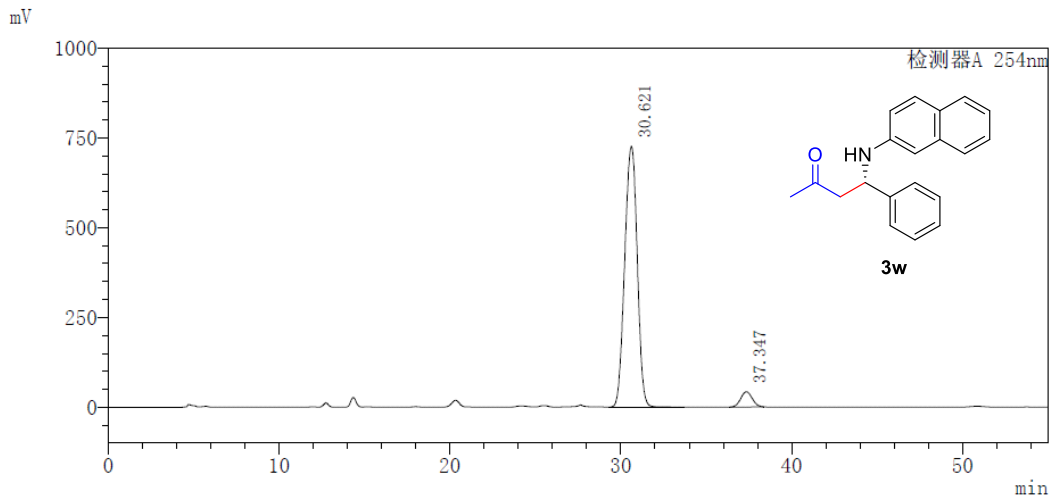

检测器A 254nm

| No. | Retention Time | Area     | Height | Concentration |
|-----|----------------|----------|--------|---------------|
| 1   | 30.621         | 37008118 | 726484 | 94.911        |
| 2   | 37.347         | 1984491  | 42386  | 5.089         |
| 总计  |                | 38992609 | 768870 |               |

### HPLC spectrum of *Rac-3x* and *Rac-3y*

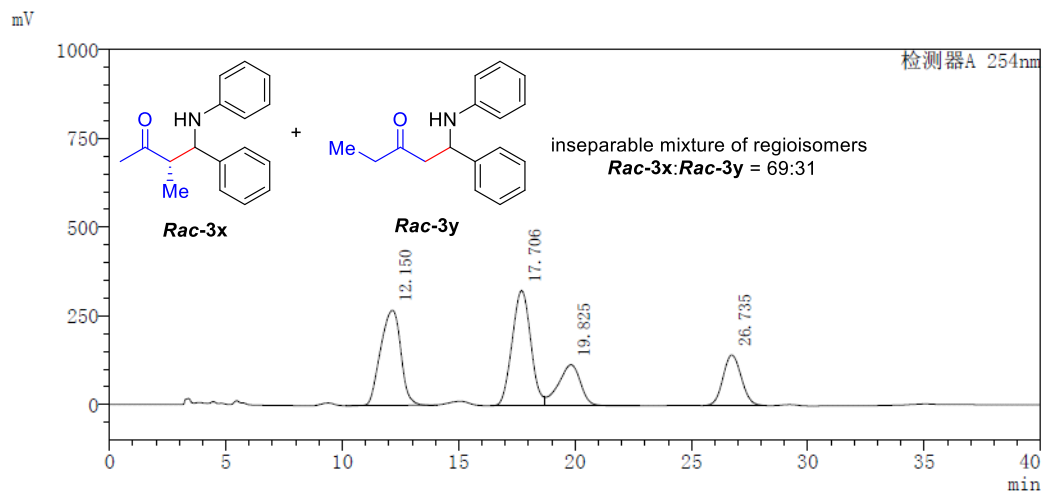

检测器A 254nm

| No. | Retention Time | Area     | Height | Concentration |
|-----|----------------|----------|--------|---------------|
| 1   | 12.150         | 16133583 | 267776 | 32.547        |
| 2   | 17.706         | 18050218 | 324084 | 36.414        |
| 3   | 19.825         | 7675784  | 115335 | 15.485        |
| 4   | 26.735         | 7709782  | 141732 | 15.554        |
| 总计  |                | 49569366 | 848927 |               |

### HPLC spectrum of *3x* and *3y*

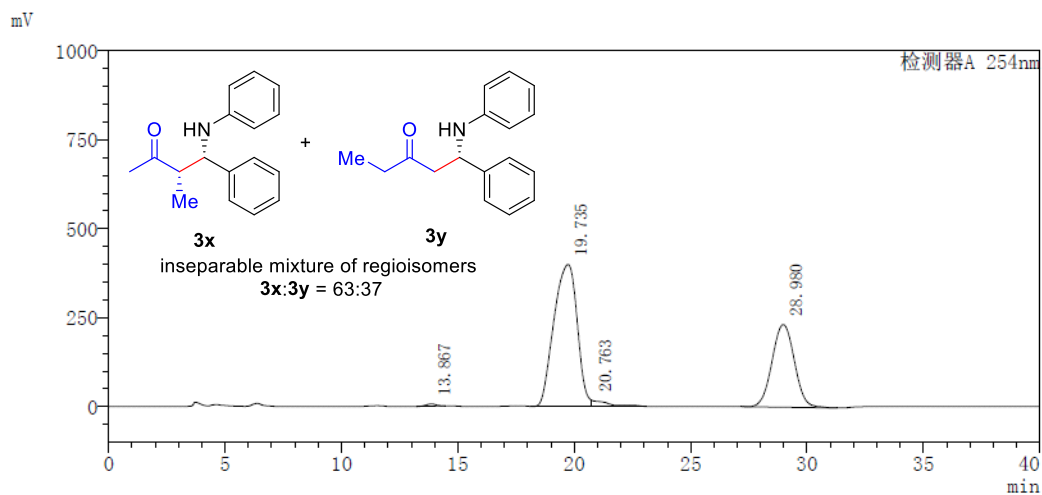

检测器A 254nm

| No. | Retention Time | Area     | Height | Concentration |
|-----|----------------|----------|--------|---------------|
| 1   | 13.867         | 189225   | 6276   | 0.426         |
| 2   | 19.735         | 27790910 | 399155 | 62.555        |
| 3   | 20.763         | 833813   | 16851  | 1.877         |
| 4   | 28.980         | 15612331 | 232514 | 35.142        |
| 总计  |                | 44426279 | 654796 |               |

## HPLC spectrum of *Rac-3z* and *Rac-3aa*

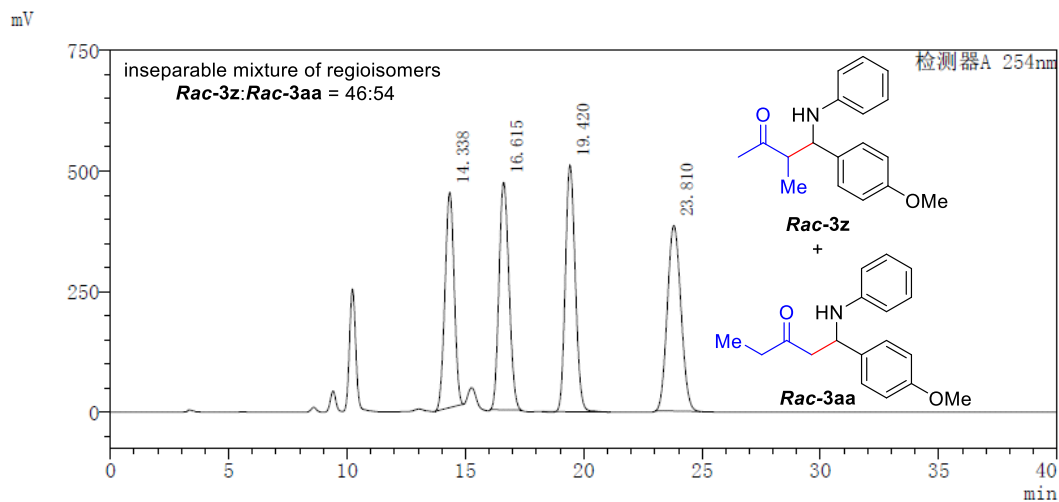

检测器A 254nm

| No. | Retention Time | Area     | Height  | Concentration |
|-----|----------------|----------|---------|---------------|
| 1   | 14.338         | 12092532 | 446138  | 21.493        |
| 2   | 16.615         | 13893959 | 471479  | 24.695        |
| 3   | 19.420         | 14902202 | 510749  | 26.487        |
| 4   | 23.810         | 15373957 | 384940  | 27.325        |
| 总计  |                | 56262650 | 1813306 |               |

## HPLC spectrum of *3z* and *3aa*

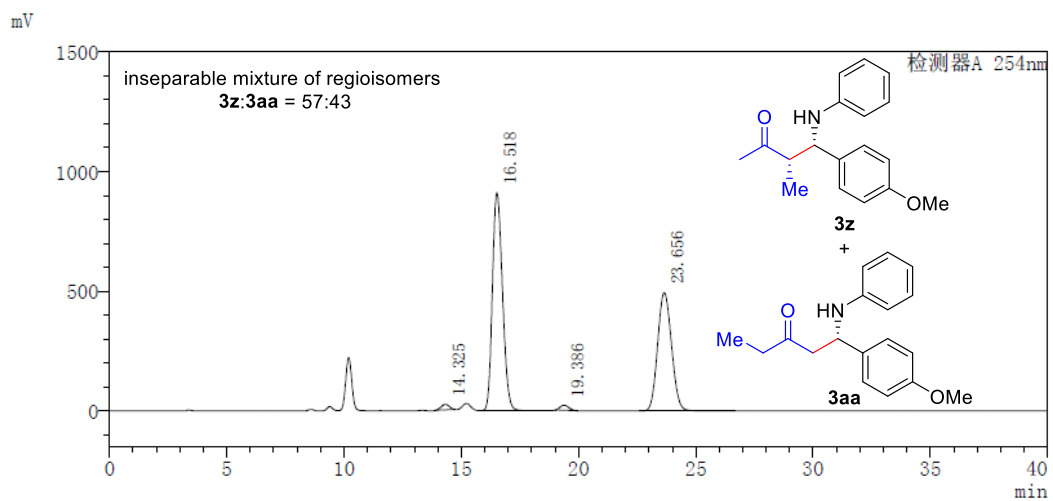

检测器A 254nm

| No. | Retention Time | Area     | Height  | Concentration |
|-----|----------------|----------|---------|---------------|
| 1   | 14.325         | 554383   | 22864   | 1.143         |
| 2   | 16.518         | 27125390 | 909735  | 55.917        |
| 3   | 19.386         | 528571   | 20959   | 1.090         |
| 4   | 23.656         | 20302109 | 493780  | 41.851        |
| 总计  |                | 48510453 | 1447338 |               |

### HPLC spectrum of *Rac*-3ab

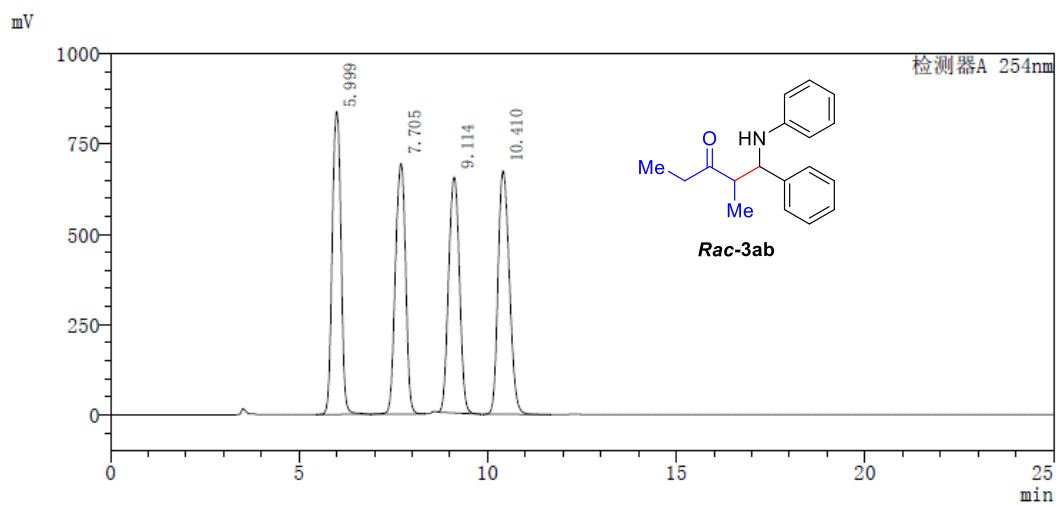

检测器A 254nm

| No. | Retention Time | Area     | Height  | Concentration |
|-----|----------------|----------|---------|---------------|
| 1   | 5.999          | 13478591 | 839109  | 25.073        |
| 2   | 7.705          | 13106221 | 694261  | 24.381        |
| 3   | 9.114          | 13071344 | 653628  | 24.316        |
| 4   | 10.410         | 14100731 | 674327  | 26.231        |
| 总计  |                | 53756887 | 2861324 |               |

### HPLC spectrum of 3ab

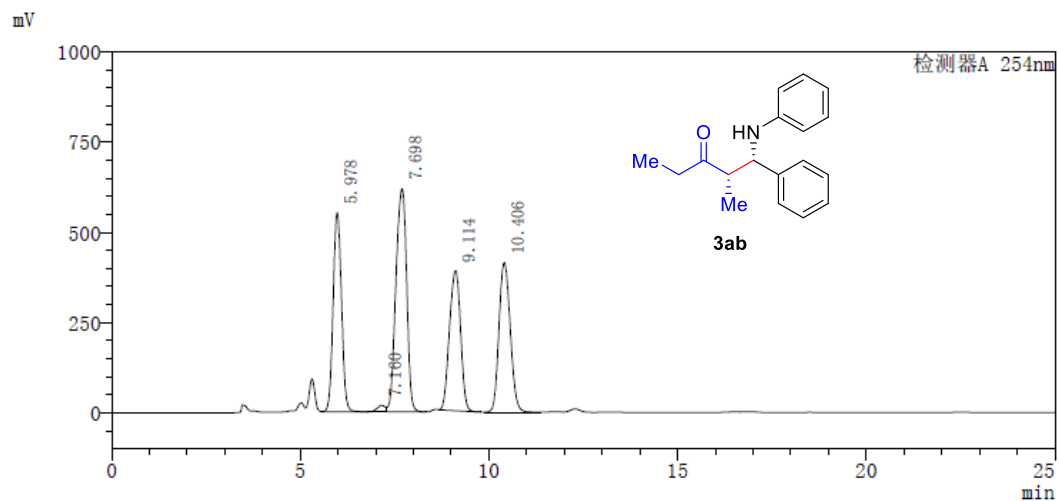

检测器A 254nm

| No. | Retention Time | Area     | Height  | Concentration |
|-----|----------------|----------|---------|---------------|
| 1   | 5.978          | 8474214  | 552525  | 22.509        |
| 2   | 7.160          | 278525   | 18536   | 0.740         |
| 3   | 7.698          | 12291072 | 619090  | 32.647        |
| 4   | 9.114          | 7953531  | 388165  | 21.126        |
| 5   | 10.406         | 8651098  | 414941  | 22.979        |
| 总计  |                | 37648439 | 1993256 |               |

### HPLC spectrum of *Rac*-3ac

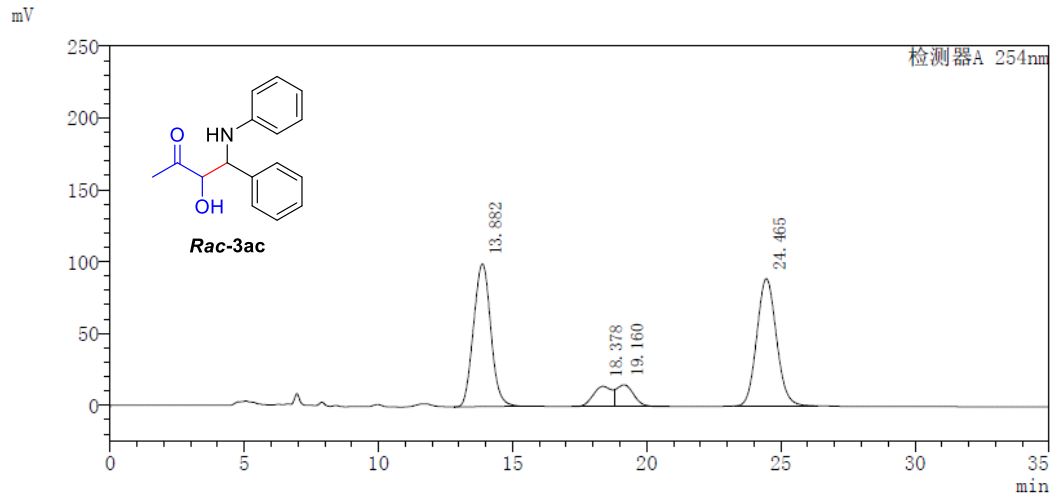

检测器A 254nm

| No. | Retention Time | Area     | Height | Concentration |
|-----|----------------|----------|--------|---------------|
| 1   | 13.882         | 4464762  | 99388  | 43.170        |
| 2   | 18.378         | 683405   | 14137  | 6.608         |
| 3   | 19.160         | 688807   | 15161  | 6.660         |
| 4   | 24.465         | 4505327  | 88517  | 43.562        |
| 总计  |                | 10342301 | 217202 |               |

### HPLC spectrum of 3ac

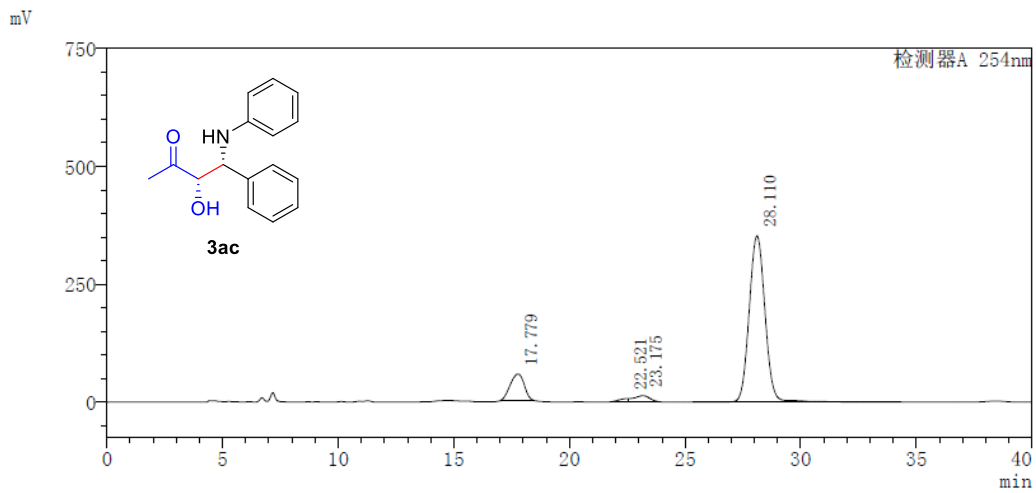

检测器A 254nm

| No. | Retention Time | Area     | Height | Concentration |
|-----|----------------|----------|--------|---------------|
| 1   | 17.779         | 2344638  | 55775  | 11.826        |
| 2   | 22.521         | 165981   | 6746   | 0.837         |
| 3   | 23.175         | 619605   | 12750  | 3.125         |
| 4   | 28.110         | 16695519 | 352442 | 84.211        |
| 总计  |                | 19825742 | 427712 |               |

### HPLC spectrum of *Rac*-3ad

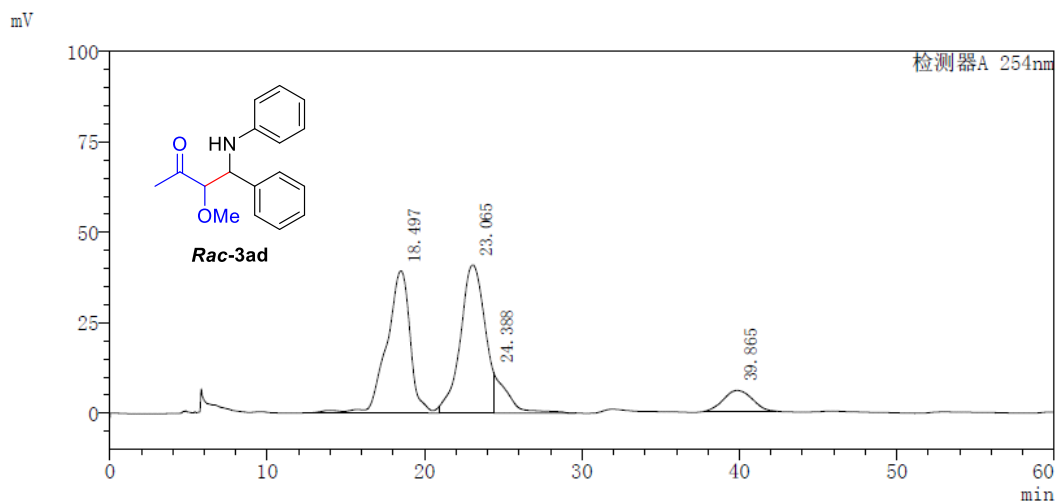

检测器A 254nm

| No. | Retention Time | Area    | Height | Concentration |
|-----|----------------|---------|--------|---------------|
| 1   | 18.497         | 4055546 | 39268  | 41.100        |
| 2   | 23.065         | 4393606 | 40964  | 44.526        |
| 3   | 24.388         | 697707  | 11271  | 7.071         |
| 4   | 39.865         | 720581  | 5721   | 7.303         |
| 总计  |                | 9867439 | 97224  |               |

### HPLC spectrum of 3ad

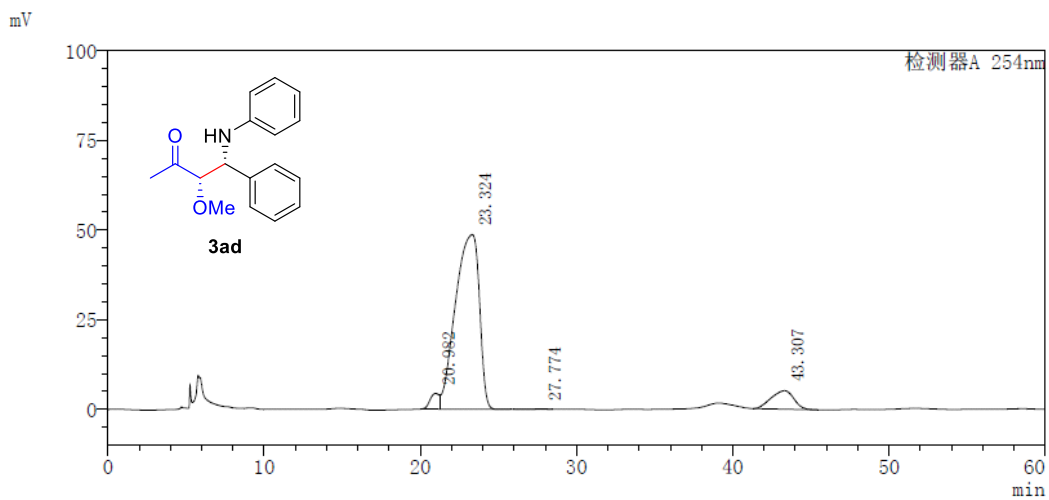

检测器A 254nm

| No. | Retention Time | Area    | Height | Concentration |
|-----|----------------|---------|--------|---------------|
| 1   | 20.982         | 172306  | 4333   | 2.926         |
| 2   | 23.324         | 5187235 | 48710  | 88.101        |
| 3   | 27.774         | 8161    | 126    | 0.139         |
| 4   | 43.307         | 520155  | 5153   | 8.834         |
| 总计  |                | 5887858 | 58323  |               |



### HPLC spectrum of *Rac-3ae*

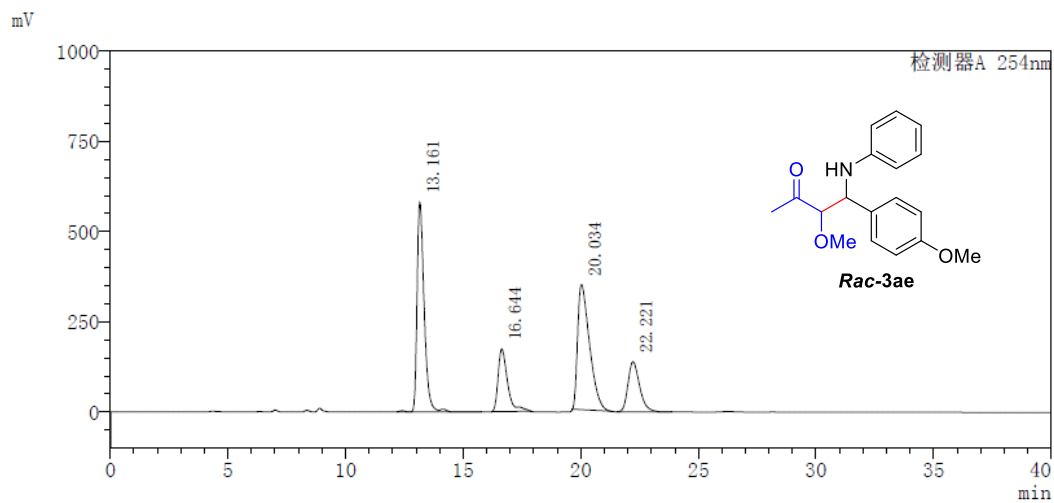

检测器A 254nm

| No. | Retention Time | Area     | Height  | Concentration |
|-----|----------------|----------|---------|---------------|
| 1   | 13.161         | 12207029 | 580706  | 35.883        |
| 2   | 16.644         | 4867054  | 173552  | 14.307        |
| 3   | 20.034         | 12166936 | 346606  | 35.765        |
| 4   | 22.221         | 4777768  | 138889  | 14.044        |
| 总计  |                | 34018787 | 1239754 |               |

### HPLC spectrum of *3ae*

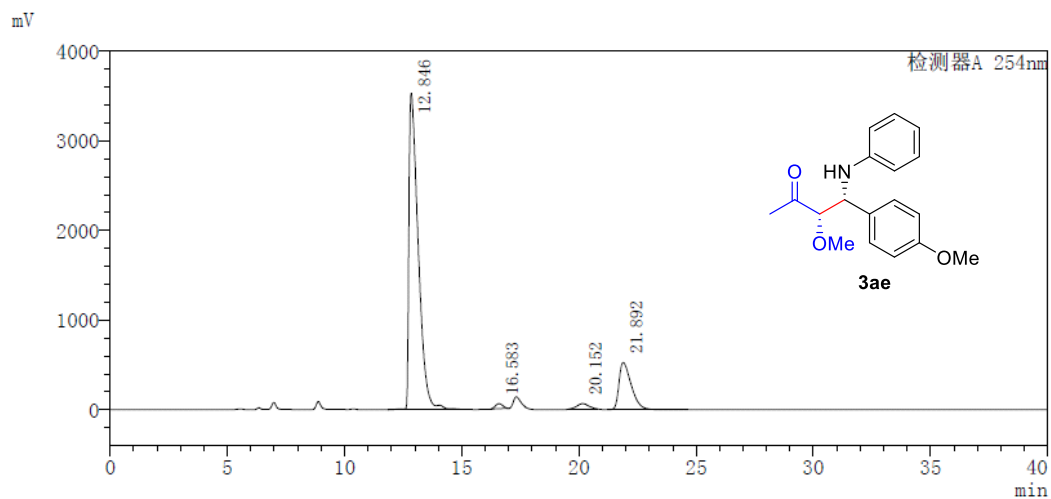

检测器A 254nm

| No. | Retention Time | Area      | Height  | Concentration |
|-----|----------------|-----------|---------|---------------|
| 1   | 12.846         | 96950854  | 3527224 | 81.377        |
| 2   | 16.583         | 1225897   | 56447   | 1.029         |
| 3   | 20.152         | 2048794   | 59828   | 1.720         |
| 4   | 21.892         | 18912538  | 526788  | 15.874        |
| 总计  |                | 119138083 | 4170287 |               |

### HPLC spectrum of *Rac*-3af

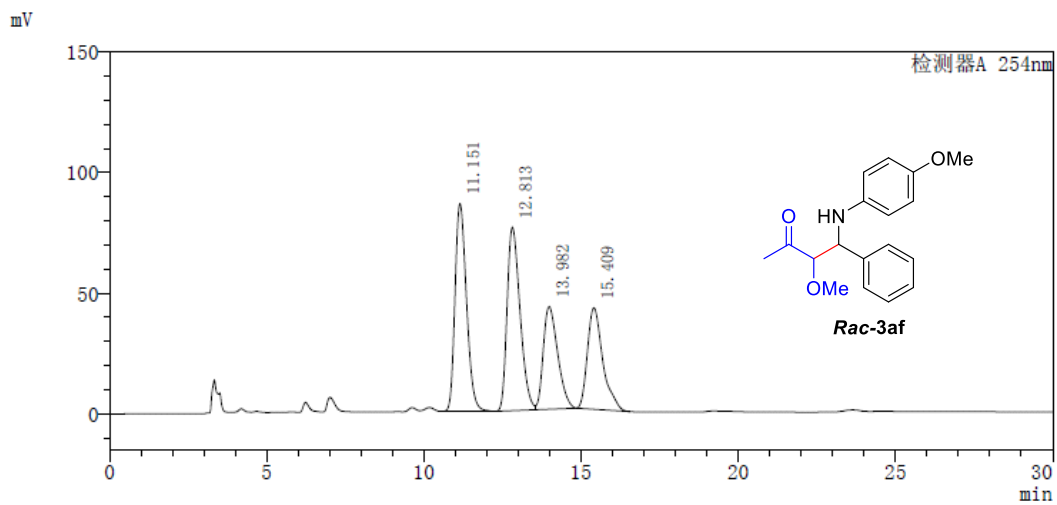

检测器A 254nm

| No. | Retention Time | Area    | Height | Concentration |
|-----|----------------|---------|--------|---------------|
| 1   | 11.151         | 2189728 | 86109  | 30.576        |
| 2   | 12.813         | 2179205 | 75999  | 30.429        |
| 3   | 13.982         | 1362001 | 42518  | 19.018        |
| 4   | 15.409         | 1430734 | 42007  | 19.978        |
| 总计  |                | 7161668 | 246633 |               |

### HPLC spectrum of 3af

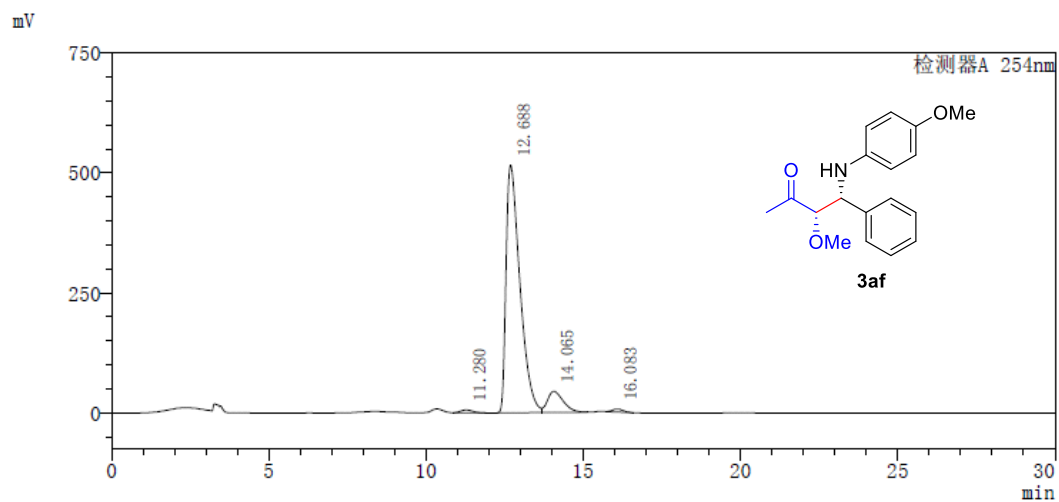

检测器A 254nm

| No. | Retention Time | Area     | Height | Concentration |
|-----|----------------|----------|--------|---------------|
| 1   | 11.280         | 153595   | 6114   | 0.868         |
| 2   | 12.688         | 15842790 | 515810 | 89.536        |
| 3   | 14.065         | 1554711  | 44235  | 8.786         |
| 4   | 16.083         | 143306   | 6410   | 0.810         |
| 总计  |                | 17694402 | 572569 |               |

### HPLC spectrum of *Rac-3ag*

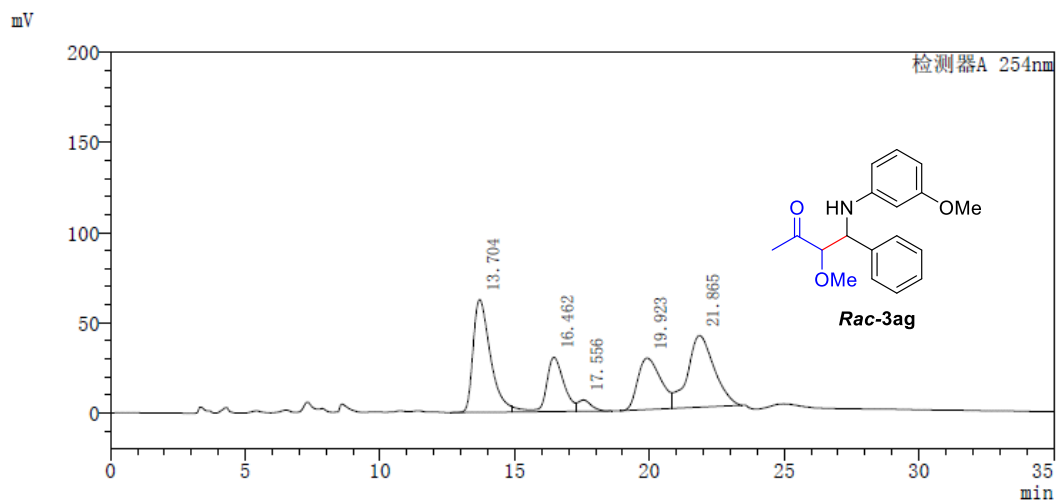

检测器A 254nm

| No. | Retention Time | Area    | Height | Concentration |
|-----|----------------|---------|--------|---------------|
| 1   | 13.704         | 2774164 | 62493  | 31.446        |
| 2   | 16.462         | 1376328 | 30133  | 15.601        |
| 3   | 17.556         | 223293  | 6345   | 2.531         |
| 4   | 19.923         | 1706228 | 28550  | 19.340        |
| 5   | 21.865         | 2742033 | 39826  | 31.082        |
| 总计  |                | 8822046 | 167348 |               |

### HPLC spectrum of *3ag*

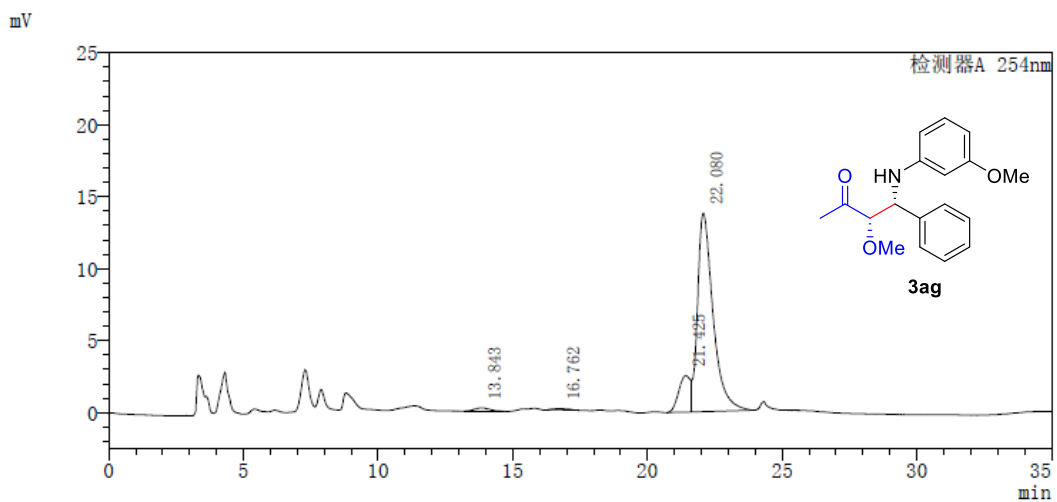

检测器A 254nm

| No. | Retention Time | Area   | Height | Concentration |
|-----|----------------|--------|--------|---------------|
| 1   | 13.843         | 8895   | 224    | 1.390         |
| 2   | 16.762         | 3800   | 95     | 0.594         |
| 3   | 21.425         | 76569  | 2528   | 11.965        |
| 4   | 22.080         | 550672 | 13772  | 86.051        |
| 总计  |                | 639936 | 16618  |               |

### HPLC spectrum of *Rac-3ah*

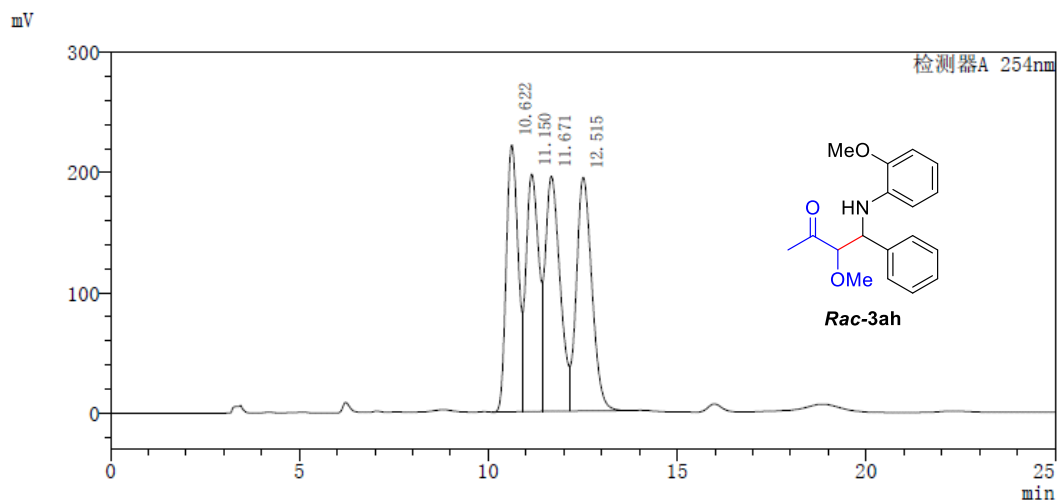

检测器A 254nm

| No. | Retention Time | Area     | Height | Concentration |
|-----|----------------|----------|--------|---------------|
| 1   | 10.622         | 4819800  | 221719 | 23.666        |
| 2   | 11.150         | 4606410  | 197412 | 22.618        |
| 3   | 11.671         | 5385490  | 195486 | 26.444        |
| 4   | 12.515         | 5554295  | 194359 | 27.272        |
| 总计  |                | 20365995 | 808976 |               |

### HPLC spectrum of *3ah*

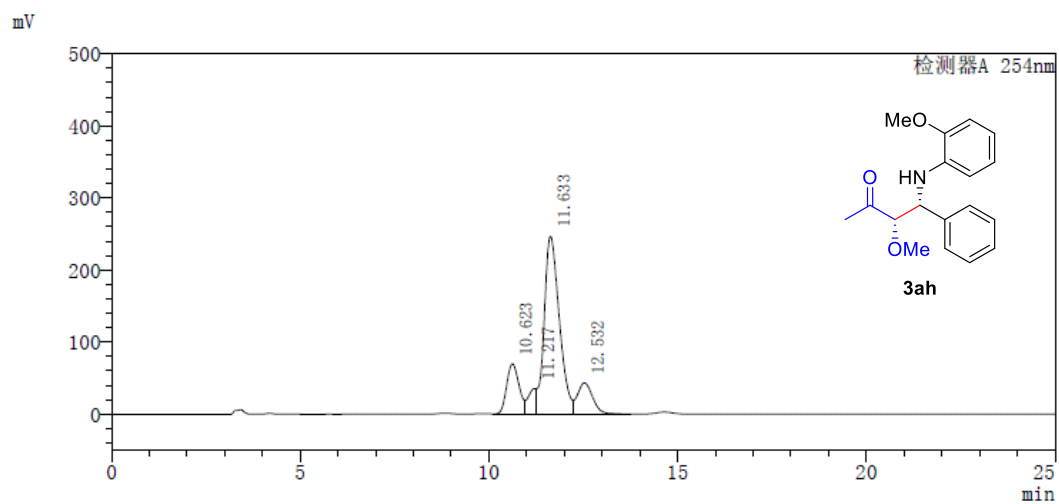

检测器A 254nm

| No. | Retention Time | Area     | Height | Concentration |
|-----|----------------|----------|--------|---------------|
| 1   | 10.623         | 1592634  | 69449  | 15.612        |
| 2   | 11.217         | 520801   | 35238  | 5.105         |
| 3   | 11.633         | 6872395  | 246428 | 67.366        |
| 4   | 12.532         | 1215742  | 43084  | 11.917        |
| 总计  |                | 10201572 | 394199 |               |

### HPLC spectrum of *Rac*-3ai

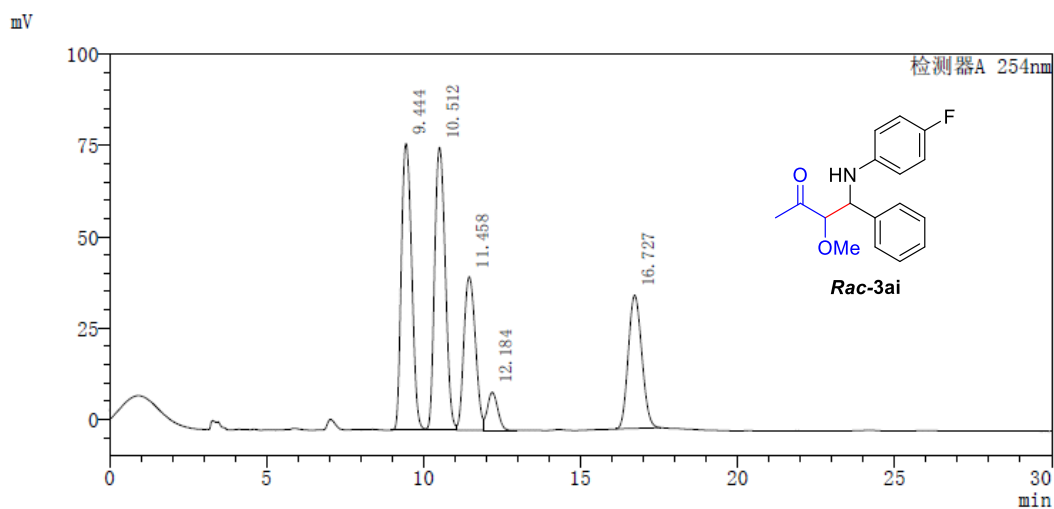

检测器A 254nm

| No. | Retention Time | Area    | Height | Concentration |
|-----|----------------|---------|--------|---------------|
| 1   | 9.444          | 1795703 | 78487  | 29.711        |
| 2   | 10.512         | 1832244 | 77469  | 30.316        |
| 3   | 11.458         | 1084629 | 42043  | 17.946        |
| 4   | 12.184         | 237274  | 10406  | 3.926         |
| 5   | 16.727         | 1094050 | 36452  | 18.102        |
| 总计  |                | 6043901 | 244857 |               |

### HPLC spectrum of 3ai

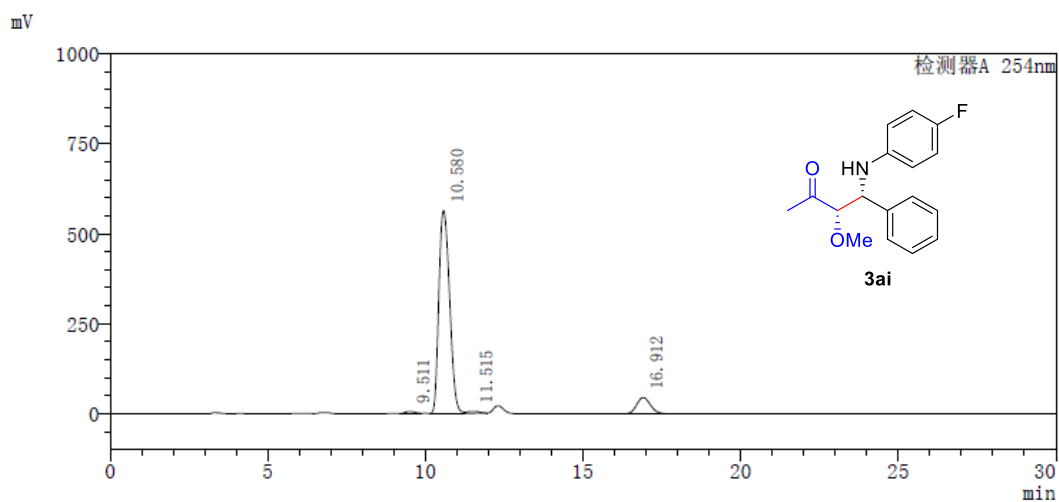

检测器A 254nm

| No. | Retention Time | Area     | Height | Concentration |
|-----|----------------|----------|--------|---------------|
| 1   | 9.511          | 98415    | 4881   | 0.661         |
| 2   | 10.580         | 13317156 | 563811 | 89.488        |
| 3   | 11.515         | 128064   | 5038   | 0.861         |
| 4   | 16.912         | 1337870  | 44678  | 8.990         |
| 总计  |                | 14881506 | 618408 |               |

### HPLC spectrum of *Rac-3aj*

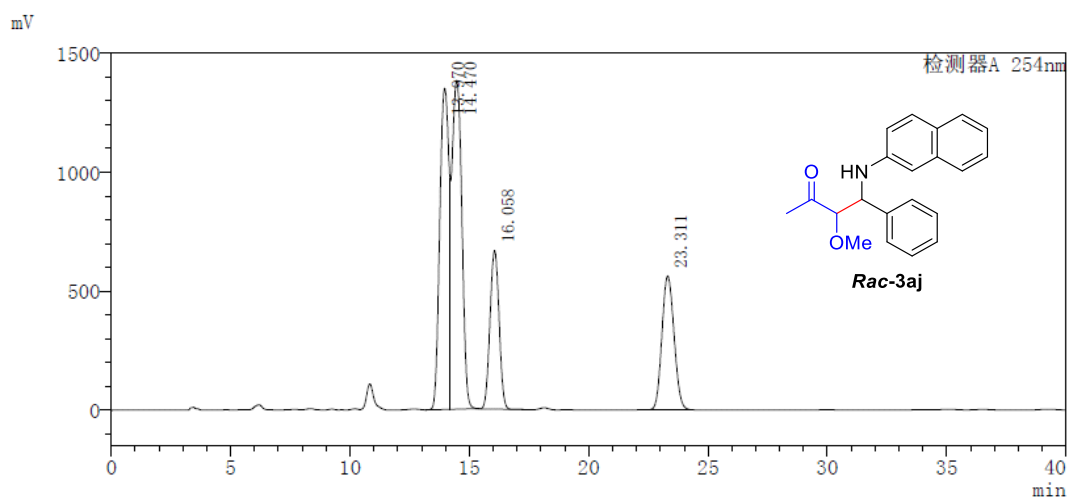

检测器A 254nm

| No. | Retention Time | Area      | Height  | Concentration |
|-----|----------------|-----------|---------|---------------|
| 1   | 13.970         | 35213422  | 1349077 | 31.127        |
| 2   | 14.470         | 40594571  | 1378470 | 35.884        |
| 3   | 16.058         | 17579209  | 666429  | 15.539        |
| 4   | 23.311         | 19739584  | 560217  | 17.449        |
| 总计  |                | 113126786 | 3954193 |               |

### HPLC spectrum of *3aj*

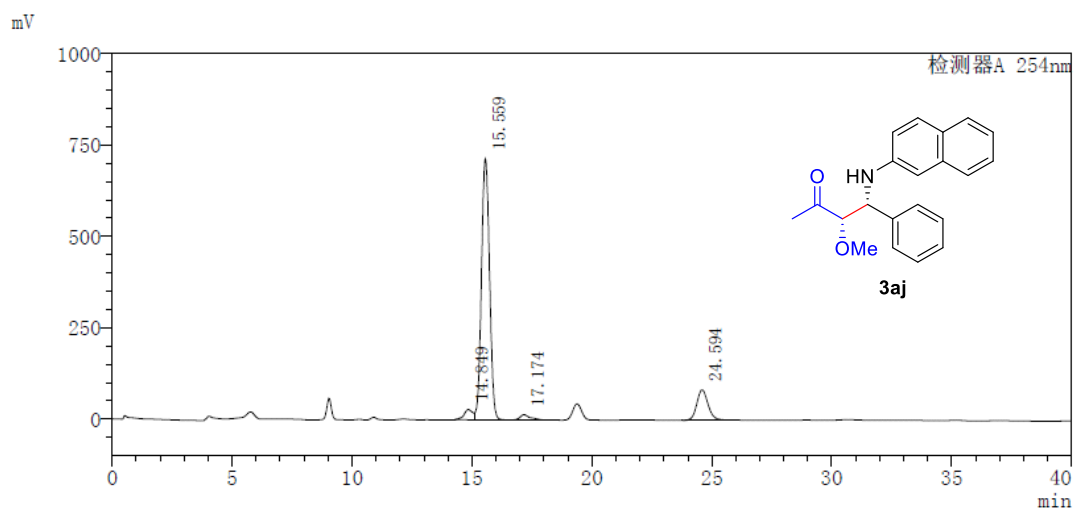

检测器A 254nm

| No. | Retention Time | Area     | Height | Concentration |
|-----|----------------|----------|--------|---------------|
| 1   | 14.849         | 697129   | 28110  | 3.396         |
| 2   | 15.559         | 16794462 | 714230 | 81.813        |
| 3   | 17.174         | 401246   | 13801  | 1.955         |
| 4   | 24.594         | 2634962  | 82447  | 12.836        |
| 总计  |                | 20527799 | 838587 |               |

### HPLC spectrum of *Rac*-3ak

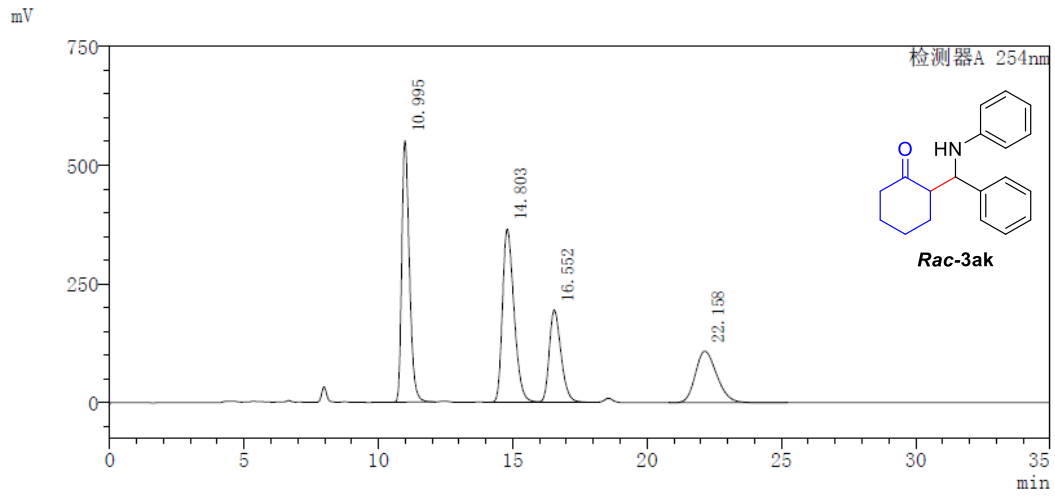

检测器A 254nm

| No. | Retention Time | Area     | Height  | Concentration |
|-----|----------------|----------|---------|---------------|
| 1   | 10.995         | 10845118 | 550533  | 32.201        |
| 2   | 14.803         | 10933003 | 364964  | 32.462        |
| 3   | 16.552         | 5908103  | 193950  | 17.542        |
| 4   | 22.158         | 5993649  | 108212  | 17.796        |
| 总计  |                | 33679873 | 1217658 |               |

### HPLC spectrum of 3ak

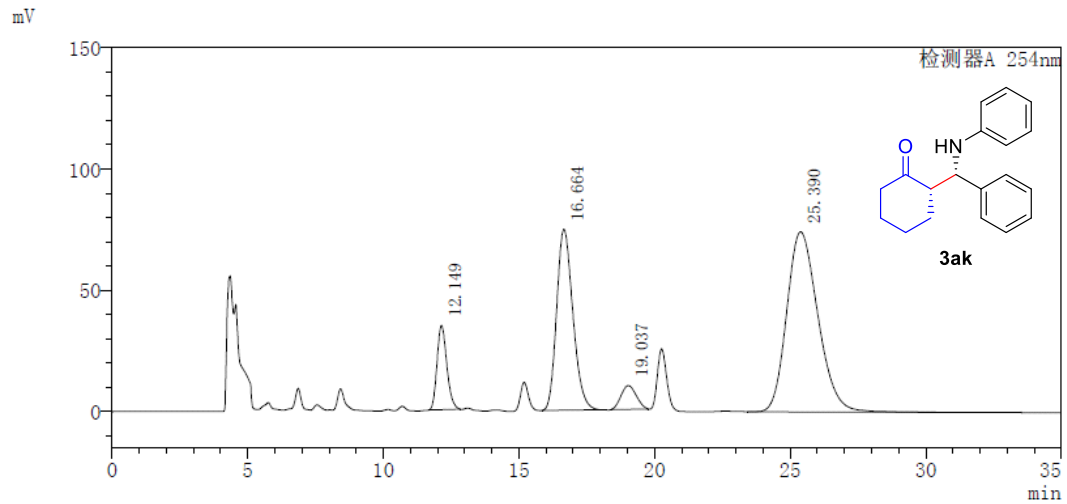

检测器A 254nm

| No. | Retention Time | Area     | Height | Concentration |
|-----|----------------|----------|--------|---------------|
| 1   | 12.149         | 871622   | 34754  | 8.463         |
| 2   | 16.664         | 3109569  | 74608  | 30.192        |
| 3   | 19.037         | 383158   | 9766   | 3.720         |
| 4   | 25.390         | 5934820  | 74283  | 57.624        |
| 总计  |                | 10299169 | 193411 |               |

### HPLC spectrum of *Rac*-3al

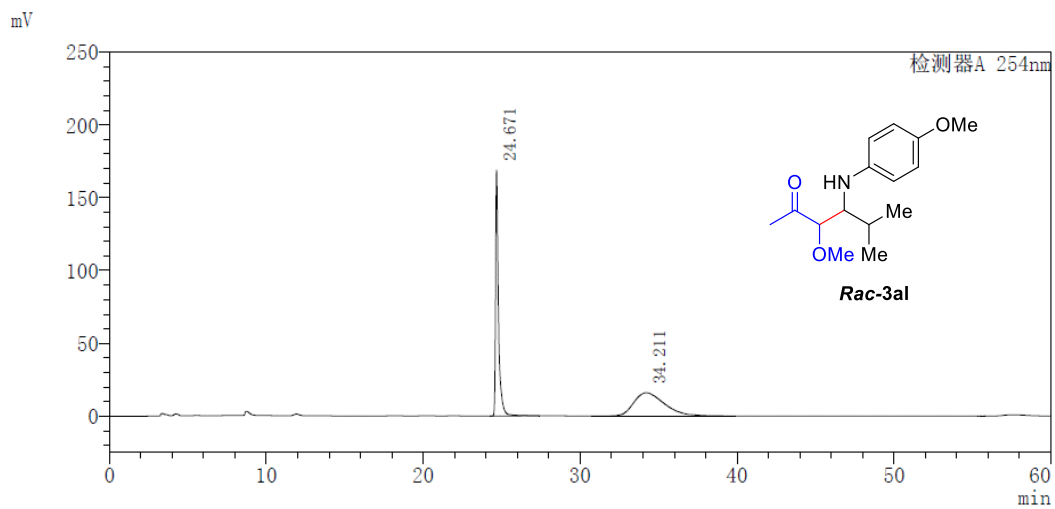

检测器A 254nm

| No. | Retention Time | Area    | Height | Concentration |
|-----|----------------|---------|--------|---------------|
| 1   | 24.671         | 2166855 | 168975 | 50.051        |
| 2   | 34.211         | 2162402 | 15862  | 49.949        |
| 总计  |                | 4329257 | 184837 |               |

### HPLC spectrum of 3al

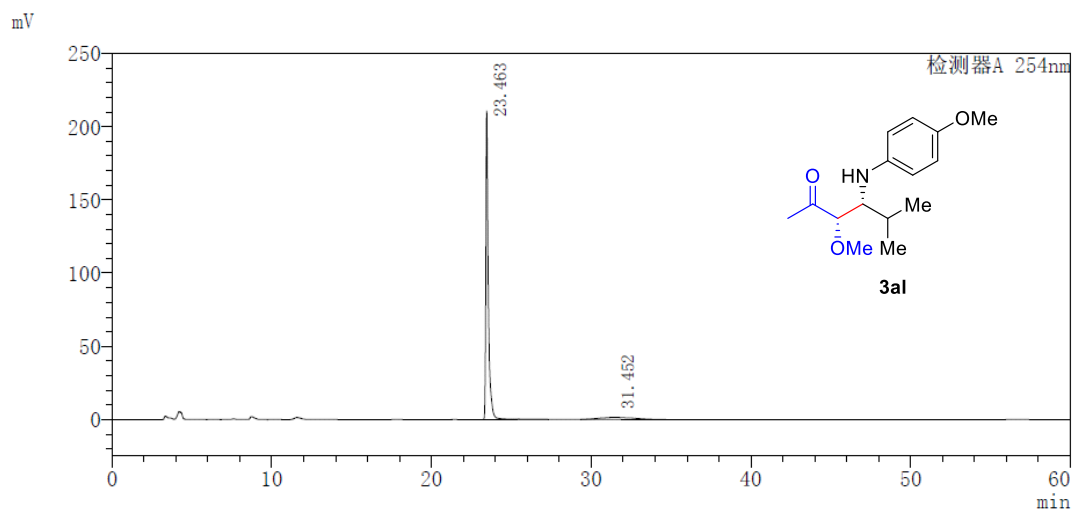

检测器A 254nm

| No. | Retention Time | Area    | Height | Concentration |
|-----|----------------|---------|--------|---------------|
| 1   | 23.463         | 2276615 | 210864 | 91.315        |
| 2   | 31.452         | 216519  | 1495   | 8.685         |
| 总计  |                | 2493134 | 212360 |               |



### HPLC spectrum of *Rac*-3am

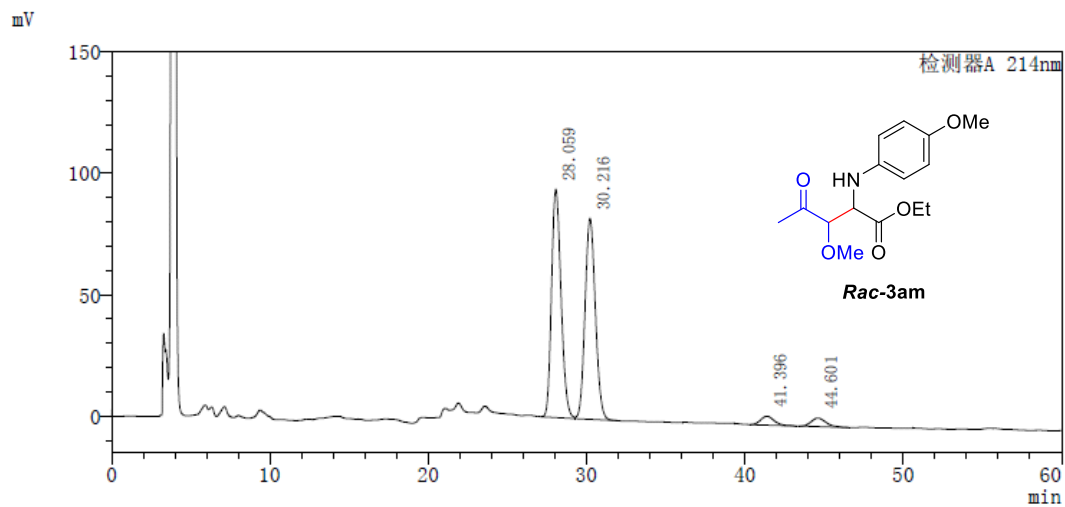

检测器A 214nm

| No. | Retention Time | Area    | Height | Concentration |
|-----|----------------|---------|--------|---------------|
| 1   | 28.059         | 3924433 | 93884  | 48.382        |
| 2   | 30.216         | 3733797 | 82751  | 46.032        |
| 3   | 41.396         | 221407  | 3691   | 2.730         |
| 4   | 44.601         | 231652  | 3536   | 2.856         |
| 总计  |                | 8111288 | 183862 |               |

### HPLC spectrum of 3am

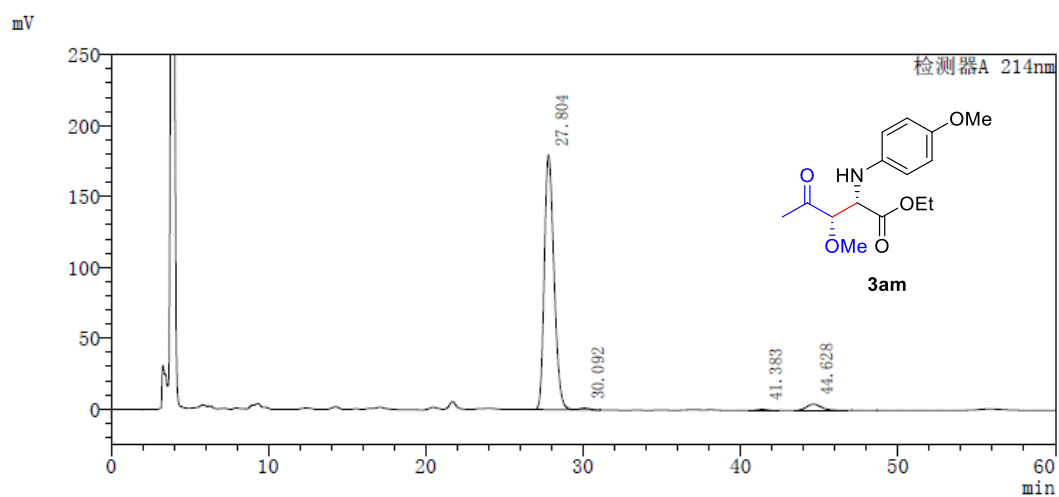

检测器A 214nm

| No. | Retention Time | Area    | Height | Concentration |
|-----|----------------|---------|--------|---------------|
| 1   | 27.804         | 7688640 | 179610 | 95.365        |
| 2   | 30.092         | 59761   | 1332   | 0.741         |
| 3   | 41.383         | 31667   | 615    | 0.393         |
| 4   | 44.628         | 282260  | 4370   | 3.501         |
| 总计  |                | 8062328 | 185927 |               |

### HPLC spectrum of *Rac-4a*

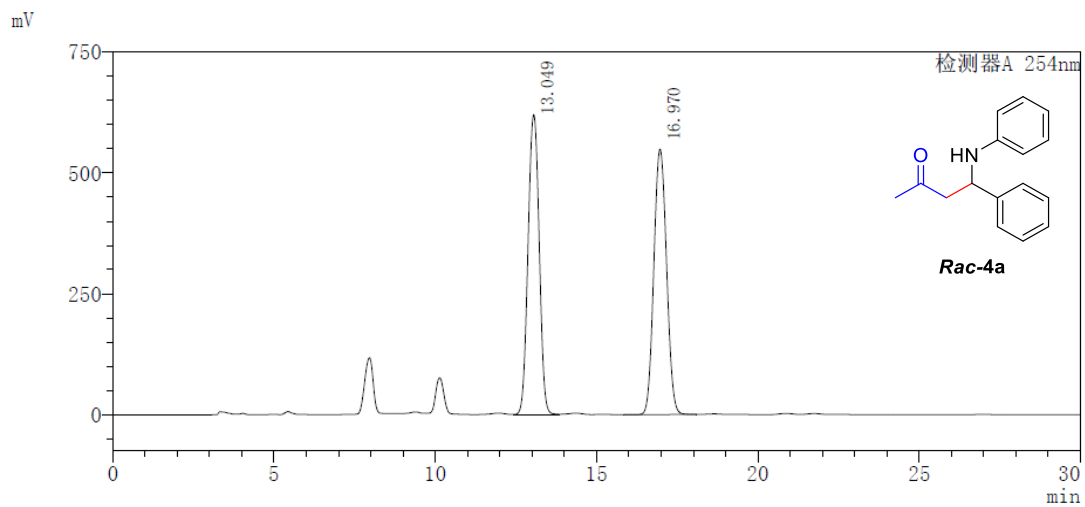

检测器A 254nm

| No. | Retention Time | Area     | Height  | Concentration |
|-----|----------------|----------|---------|---------------|
| 1   | 13.049         | 14853059 | 619249  | 49.676        |
| 2   | 16.970         | 15047056 | 548490  | 50.324        |
| 总计  |                | 29900115 | 1167739 |               |

### HPLC spectrum of *4a*

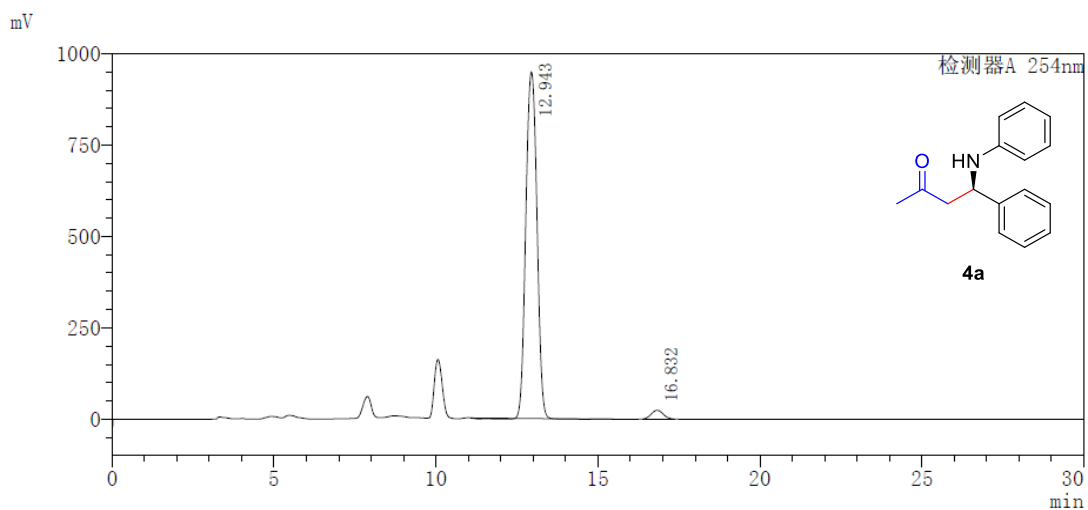

检测器A 254nm

| No. | Retention Time | Area     | Height | Concentration |
|-----|----------------|----------|--------|---------------|
| 1   | 12.943         | 22417274 | 948331 | 97.372        |
| 2   | 16.832         | 604957   | 24023  | 2.628         |
| 总计  |                | 23022230 | 972354 |               |

### HPLC spectrum of *Rac-4b*

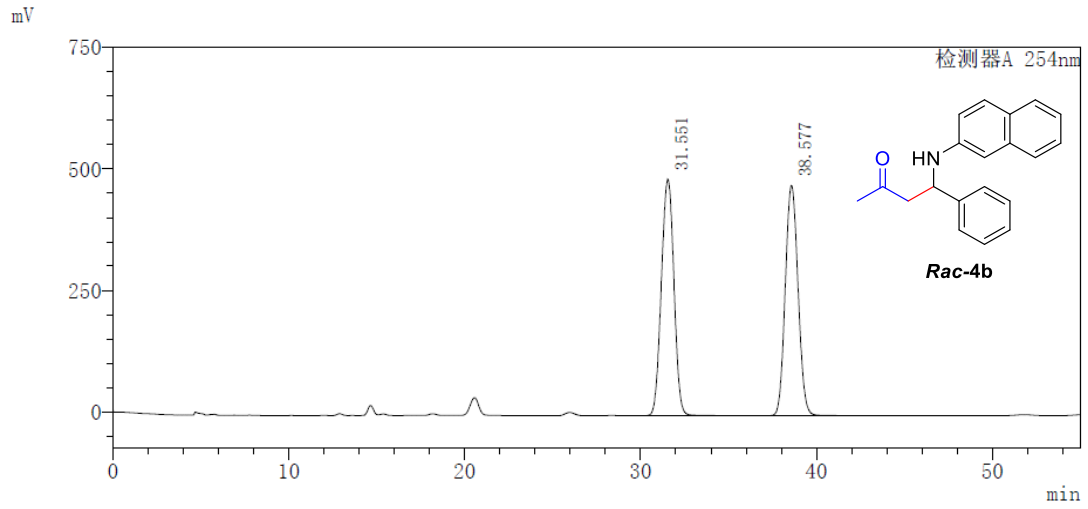

检测器A 254nm

| No. | Retention Time | Area     | Height | Concentration |
|-----|----------------|----------|--------|---------------|
| 1   | 31.551         | 24173100 | 485771 | 50.312        |
| 2   | 38.577         | 23872976 | 473308 | 49.688        |
| 总计  |                | 48046076 | 959080 |               |

### HPLC spectrum of **4b**

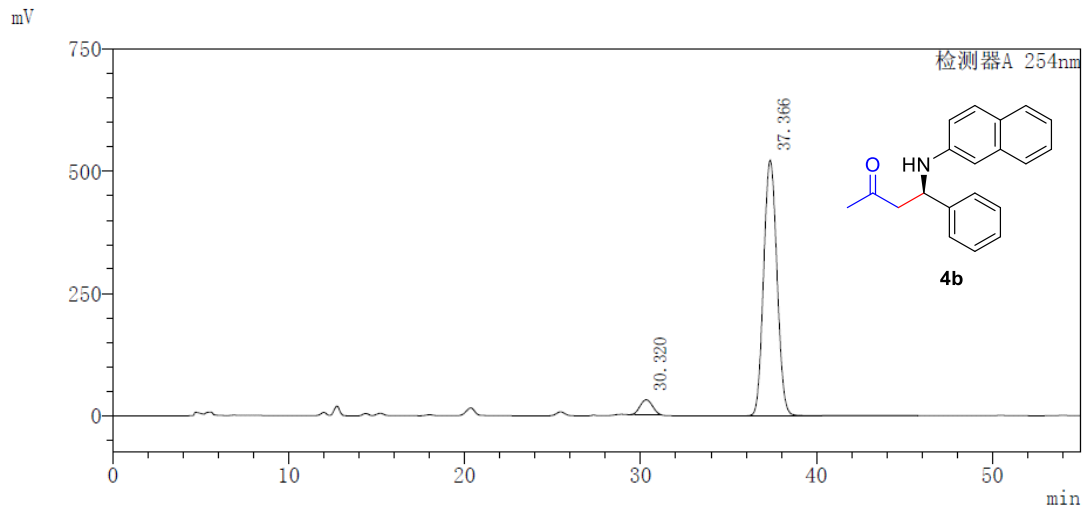

检测器A 254nm

| No. | Retention Time | Area     | Height | Concentration |
|-----|----------------|----------|--------|---------------|
| 1   | 30.320         | 1480819  | 30535  | 5.096         |
| 2   | 37.366         | 27576134 | 522405 | 94.904        |
| 总计  |                | 29056953 | 552940 |               |

### HPLC spectrum of *Rac-4c* and *Rac-4d*

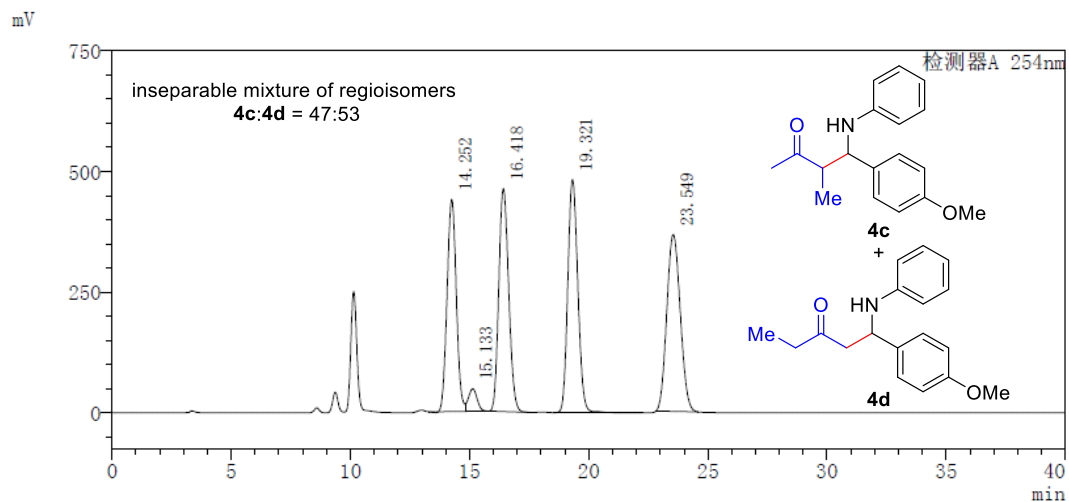

检测器A 254nm

| No. | Retention Time | Area     | Height  | Concentration |
|-----|----------------|----------|---------|---------------|
| 1   | 14.252         | 11854063 | 439571  | 21.584        |
| 2   | 15.133         | 1181434  | 46745   | 2.151         |
| 3   | 16.418         | 13325754 | 461627  | 24.264        |
| 4   | 19.321         | 14130994 | 482755  | 25.730        |
| 5   | 23.549         | 14427114 | 366662  | 26.270        |
| 总计  |                | 54919359 | 1797360 |               |

### HPLC spectrum of *4c* and *4d*

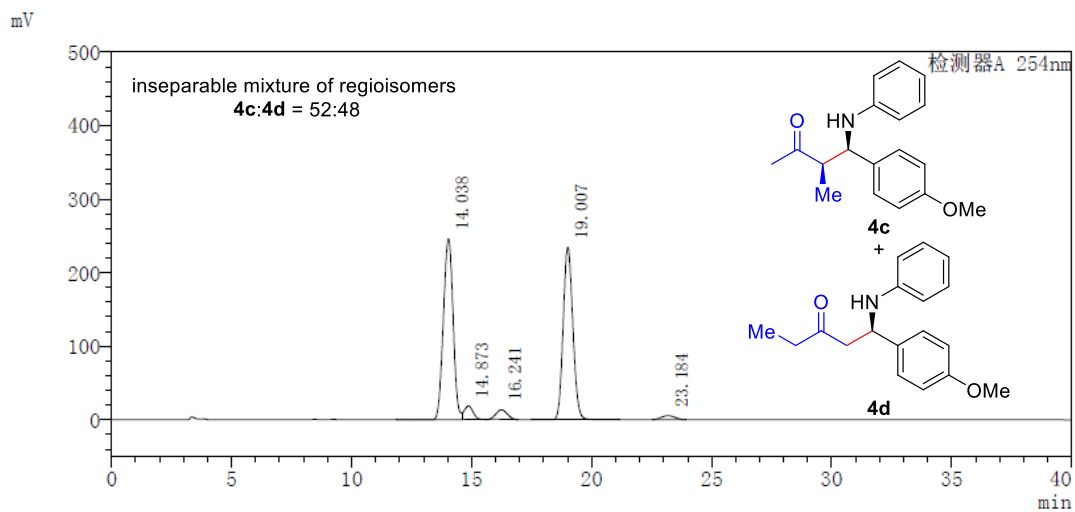

检测器A 254nm

| No. | Retention Time | Area     | Height | Concentration |
|-----|----------------|----------|--------|---------------|
| 1   | 14.038         | 6902397  | 245828 | 47.270        |
| 2   | 14.873         | 463776   | 18338  | 3.176         |
| 3   | 16.241         | 412298   | 12907  | 2.824         |
| 4   | 19.007         | 6604605  | 234504 | 45.230        |
| 5   | 23.184         | 219066   | 5428   | 1.500         |
| 总计  |                | 14602142 | 517005 |               |

### HPLC spectrum of *Rac-4e*

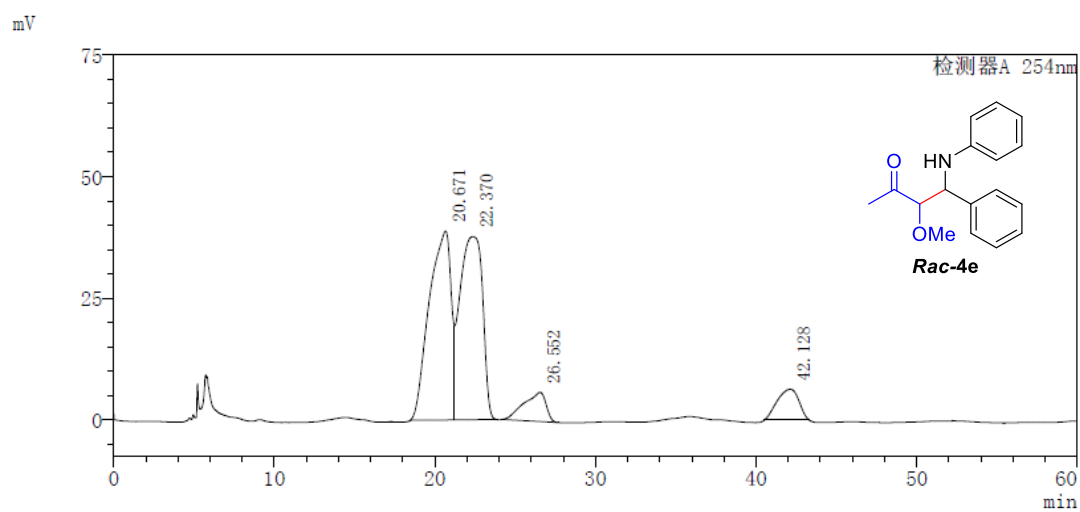

检测器A 254nm

| No. | Retention Time | Area    | Height | Concentration |
|-----|----------------|---------|--------|---------------|
| 1   | 20.671         | 3712079 | 38835  | 43.246        |
| 2   | 22.370         | 3710810 | 37636  | 43.231        |
| 3   | 26.552         | 574835  | 5995   | 6.697         |
| 4   | 42.128         | 585966  | 6304   | 6.827         |
| 总计  |                | 8583690 | 88770  |               |

### HPLC spectrum of *4e*

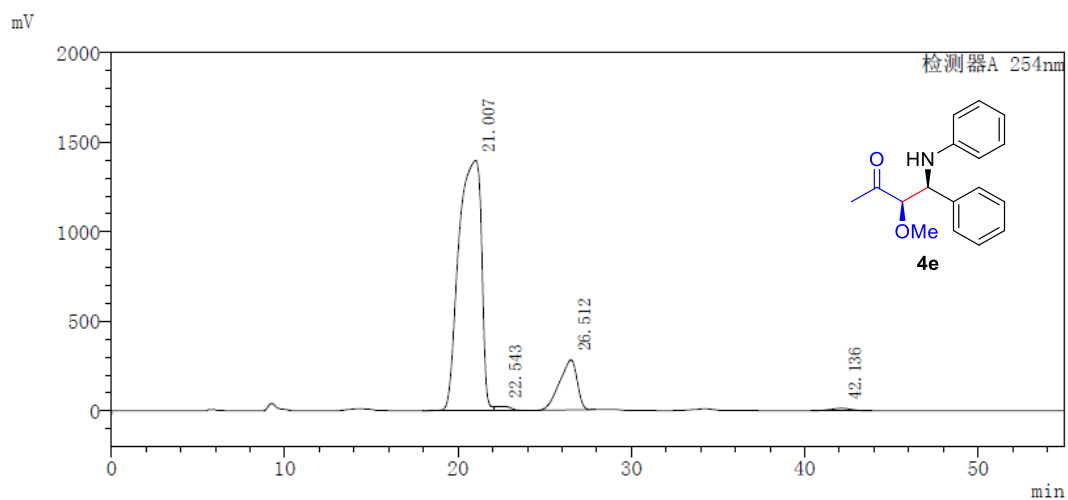

检测器A 254nm

| No. | Retention Time | Area      | Height  | Concentration |
|-----|----------------|-----------|---------|---------------|
| 1   | 21.007         | 126808201 | 1396919 | 85.162        |
| 2   | 22.543         | 1383489   | 21959   | 0.929         |
| 3   | 26.512         | 19762638  | 279239  | 13.272        |
| 4   | 42.136         | 948666    | 12365   | 0.637         |
| 总计  |                | 148902994 | 1710481 |               |

### HPLC spectrum of *Rac-4f*

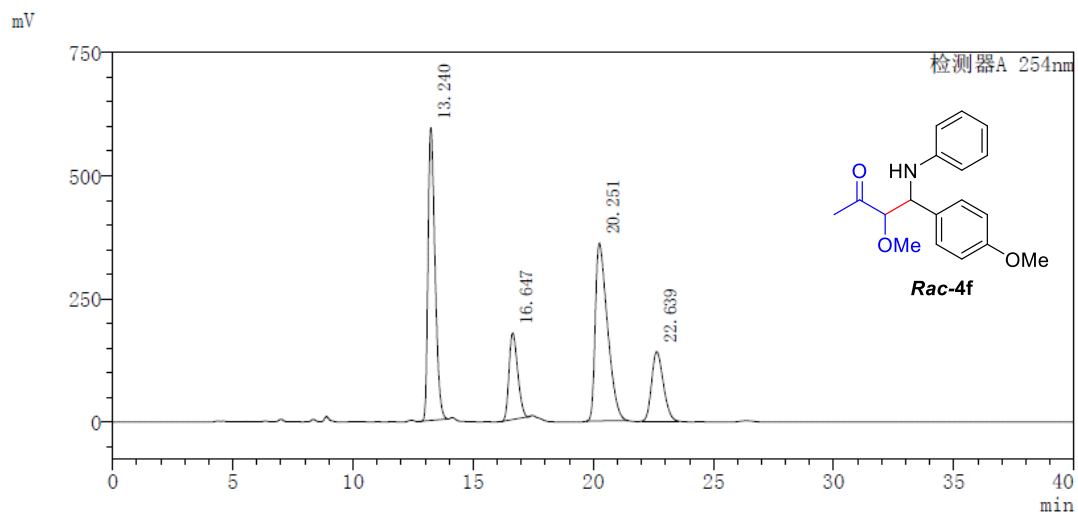

检测器A 254nm

| No. | Retention Time | Area     | Height  | Concentration |
|-----|----------------|----------|---------|---------------|
| 1   | 13.240         | 11985141 | 594082  | 35.323        |
| 2   | 16.647         | 4419346  | 176029  | 13.025        |
| 3   | 20.251         | 12750932 | 360545  | 37.580        |
| 4   | 22.639         | 4774588  | 140941  | 14.072        |
| 总计  |                | 33930008 | 1271598 |               |

### HPLC spectrum of *4f*

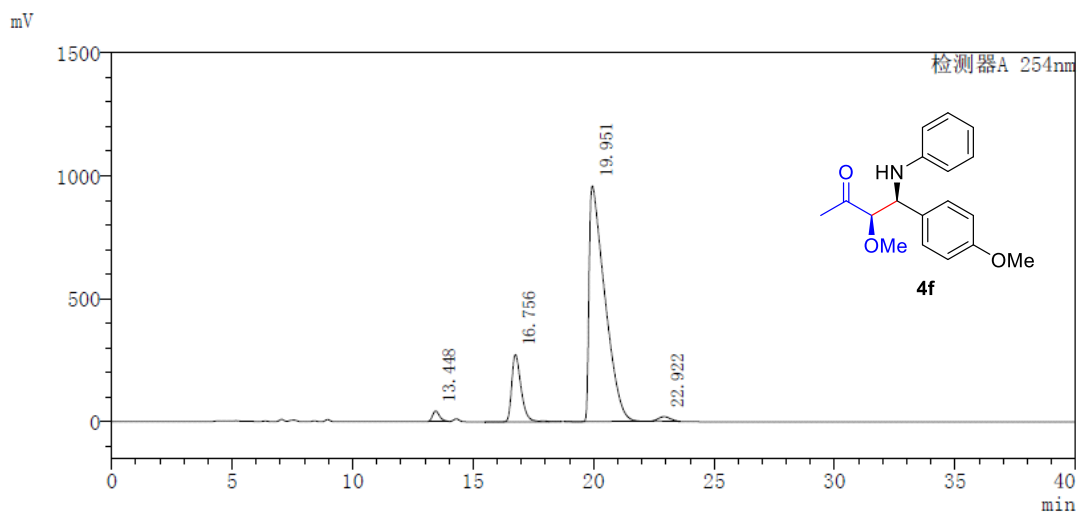

检测器A 254nm

| No. | Retention Time | Area     | Height  | Concentration |
|-----|----------------|----------|---------|---------------|
| 1   | 13.448         | 807153   | 41426   | 1.547         |
| 2   | 16.756         | 7400046  | 273727  | 14.181        |
| 3   | 19.951         | 43376115 | 958641  | 83.123        |
| 4   | 22.922         | 599813   | 17808   | 1.149         |
| 总计  |                | 52183127 | 1291602 |               |

### HPLC spectrum of *Rac-4g*

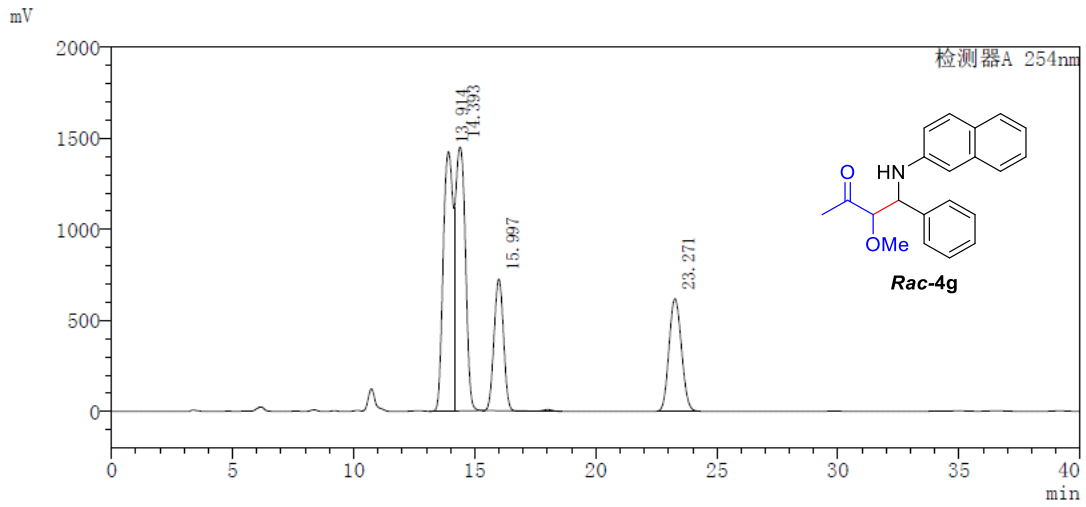

检测器A 254nm

| No. | Retention Time | Area      | Height  | Concentration |
|-----|----------------|-----------|---------|---------------|
| 1   | 13.914         | 40017783  | 1423786 | 32.564        |
| 2   | 14.393         | 41121893  | 1449377 | 33.463        |
| 3   | 15.997         | 19833856  | 721905  | 16.140        |
| 4   | 23.271         | 21915001  | 615831  | 17.833        |
| 总计  |                | 122888533 | 4210899 |               |

### HPLC spectrum of *4g*

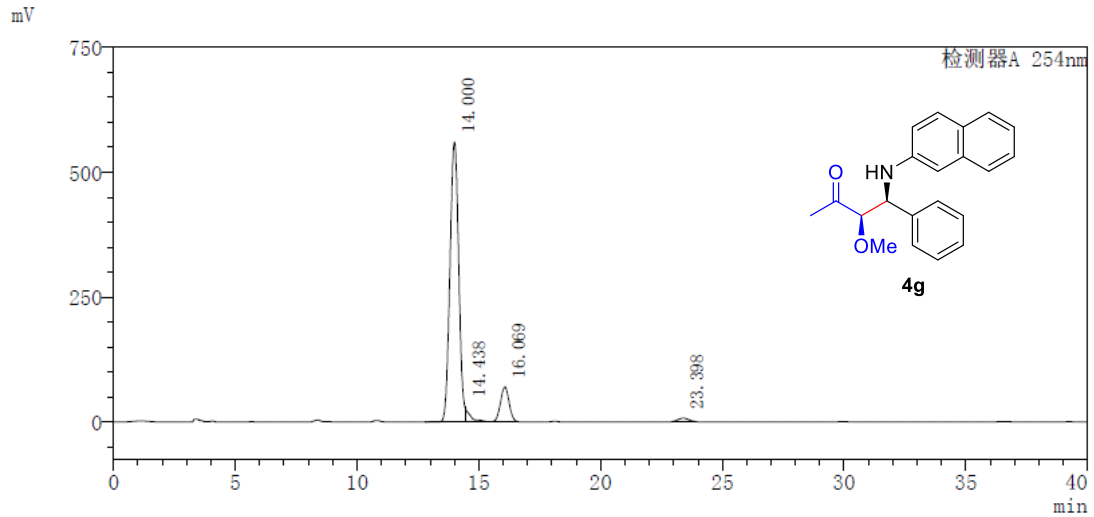

检测器A 254nm

| No. | Retention Time | Area     | Height | Concentration |
|-----|----------------|----------|--------|---------------|
| 1   | 14.000         | 13820479 | 559848 | 86.116        |
| 2   | 14.438         | 395704   | 28802  | 2.466         |
| 3   | 16.069         | 1638031  | 68564  | 10.207        |
| 4   | 23.398         | 194504   | 6742   | 1.212         |
| 总计  |                | 16048719 | 663955 |               |
